# Supplementary material for: The role of zinc transporter proteins as predictive and prognostic biomarkers of hepatocellular cancer
Source: PeerJ. 2021 Oct 15;9:e12314. doi: 10.7717/peerj.12314 (PMC8522644; doi:10.7717/peerj.12314)
Supplement: Supplemental Information 1 [file peerj-09-12314-s001.xlsx]

## Sheet: ZNT1
ID#	Area	Mean	XM	YM	% Area	Min Thr	Max Thr
1	161084	255	14080	3436	0.9012	255	255
2	181668	255	13939	3459	0.9034	255	255
3	183556	255	16345	3428	0.9556	255	255
4	188195	255	14062	3453	0.95	255	255
5	187241	255	14213	3380	0.9498	255	255
6	146678	255	11950	3516	0.8002	255	255
7	156897	255	14651	3442	0.9043	255	255
8	118257	255	14066	3245	0.79789	255	255
9	145977	255	15685	3469	0.7531	255	255
10	167345	255	14678	4234	0.70389	255	255
11	188545	255	16210	3321	0.9462	255	255
12	183900	255	17213	3329	0.9543	255	255
13	177342	255	12214	3101	0.8	255	255
14	181452	255	13521	3410	0.8048	255	255
15	167294	255	17897	4789	0.9978	255	255
16	156172	255	11690	4632	0.7969	255	255

## Sheet: ZIP14
ID#	Area	Mean	XM	YM	% Area	Min Thr	Max Thr
1	34328	255	17885	3271	0.1031	255	255
2	78985	255	15302	3779	0.30455	255	255
3	152345	255	17678	3459	0.7015	255	255
4	184195	255	14062	3516	0.9456	255	255
5	177278	255	14213	3320	0.7975	255	255
6	151421	255	12950	3236	0.7	255	255
7	36897	255	16021	3212	0.1042	255	255
8	176456	255	16356	3243	0.89598	255	255
9	149117	255	16815	4269	0.70103	255	255
10	161003	255	13338	4234	0.50255	255	255
11	38345	255	15456	3321	0.0987	255	255
12	181344	255	14317	3754	0.94566	255	255
13	90562	255	15214	3519	0.297	255	255
14	28274	255	14087	3329	0.10102	255	255
15	0.494	255	18373	3067	0.00256	255	255
16	245172	255	13560	3384	0.0966	255	255

## Sheet: znt1-zip5
	HCC									INTENSITY	H-score	AVERAGE
	ID#	Area	Mean	XM	YM	% Area	Min Thr	Max Thr
	1	161084	255	14080	3436	0.9012	255	255		2	180.24	130.224
	2	181668	255	13939	3459	0.9034	255	255		1	90.34
	3	183556	255	16345	3428	0.9556	255	255		1	95.56
	4	188195	255	14062	3453	0.95	255	255		2	190
	5	187241	255	14213	3380	0.9498	255	255		1	94.98
	Znt1
	Cirrhosis
	ID#	Area	Mean	XM	YM	% Area	Min Thr	Max Thr
	13	84562	255	13334	3519	0.414	255	255		1	41.4	53.6313
	14	78974	255	16667	3329	0.5034	255	255		1	50.34
	15	59987	255	15253	3067	0.34577	255	255		2	69.154
	Zip5
	Cirrhosis
	ID#	Area	Mean	XM	YM	% Area	Min Thr	Max Thr
	1	140567	255	13344	3201	0.7852	255	255		2	157.04	170.739
	3	154259	255	14465	4348	0.8513	255	255		2	170.26
	5	178175	255	13563	3240	0.92458	255	255		2	184.916
	ZİP5
	HCC
	ID#	Area	Mean	XM	YM	% Area	Min Thr	Max Thr
	13	95562	255	13334	3519	0.55	255	255		1	55	75.0787
	14	113204	255	16667	3329	0.70456	255	255		1	70.456
	15	78927	255	15253	3067	0.4989	255	255		2	99.78
