# Supplementary material for: The role of zinc transporter proteins as predictive and prognostic biomarkers of hepatocellular cancer
Source: PeerJ. 2021 Oct 15;9:e12314. doi: 10.7717/peerj.12314 (PMC8522644; doi:10.7717/peerj.12314)
Supplement: Supplemental Information 2 [file peerj-09-12314-s002.xlsx]

## Sheet: Zinc measurement
Sample	M3 Mean FITC-H	Zinc mean
Snu398#1 Unstained	188.595
Snu398 #1 F	239.328	3.87625
Snu398#1 Fmin	187.042
Snu398#1 Fmax	441.66
Snu398#2 Unstained	170.17
Snu398#2 F	224.456	4.26911
Snu398#2 Fmin	168.009
Snu398#2 Fmax	422.789
Snu398#3 Unstained	152.353
Snu398#3 F	211.335	4.76904
Snu398#3 Fmin	154.607
Snu398#3 Fmax	389.761
TPEN #1 Unstained	47678
TPEN #1 F	64345	24.8788
TPEN #1 Fmin	46696
TPEN #1 Fmax	74986
TPEN #2 Unstained	33809
TPEN #2 F	45533	28.2416
TPEN #2 Fmin	20575
TPEN #2 Fmax	58789
TPEN #3 Unstained	34113
TPEN #3 F	57710	26.2418
TPEN #3 Fmin	36211
TPEN #3 Fmax	69999
