# Supplementary material for: The role of zinc transporter proteins as predictive and prognostic biomarkers of hepatocellular cancer
Source: PeerJ. 2021 Oct 15;9:e12314. doi: 10.7717/peerj.12314 (PMC8522644; doi:10.7717/peerj.12314)
Supplement: Supplemental Information 4 [file peerj-09-12314-s004.xlsx]

## Sheet: GEPIA
Gene Symbol	Gene ID	Median (Tumor)	Median (Normal)	Log2(Fold Change)	adjp
AADAT	ENSG00000109576.13	1830	11500	-2143	1.43e-54
AASS	ENSG00000008311.14	3240	11160	-1520	3.01e-25
AATF	ENSG00000275700.4	29171	10640	1374	3.42e-89
ABCA8	ENSG00000141338.13	3330	13070	-1700	7.44e-40
ABCA9	ENSG00000154258.16	0.630	3270	-1389	1.23e-47
ABCB6	ENSG00000115657.12	39371	18615	1041	7.35e-24
ABCC6P2	ENSG00000255277.3	8950	3735	1071	1.61e-38
ABCC9	ENSG00000069431.10	2250	6825	-1268	5.13e-30
ABHD12	ENSG00000100997.18	35671	12070	1488	1.10e-90
ABLIM3	ENSG00000173210.19	12690	37135	-1478	6.90e-44
AC004538.3	ENSG00000230333.6	0.140	2040	-1415	5.08e-53
AC004540.4	ENSG00000225792.1	0.170	1654	-1182	3.33e-30
AC005077.14	ENSG00000230882.1	0.520	6740	-2348	4.83e-69
AC005255.3	ENSG00000256210.3	3450	0.000	2154	9.25e-53
AC005943.2	ENSG00000267059.2	1380	0.000	1251	3.14e-18
AC005943.6	ENSG00000279009.1	2240	0.000	1696	3.84e-5
AC006128.2	ENSG00000279716.1	1150	7035	-1902	1.00e-32
AC007318.5	ENSG00000172974.11	4630	1580	1126	5.07e-35
AC009065.4	ENSG00000279473.1	1340	0.000	1227	3.03e-45
AC009120.6	ENSG00000259972.2	1990	5625	-1148	1.52e-16
AC009963.3	ENSG00000233494.1	12750	43499	-1694	3.49e-25
AC012146.7	ENSG00000234327.7	5990	2170	1141	3.61e-36
AC016292.3	ENSG00000108958.4	2150	0.485	1085	1.48e-34
AC016739.2	ENSG00000218175.2	12830	4745	1267	1.38e-42
AC016747.3	ENSG00000212978.6	4320	1610	1027	1.73e-43
AC068535.3	ENSG00000225765.1	1620	9540	-2008	7.65e-29
AC092171.4	ENSG00000230733.2	2230	0.560	1050	1.05e-43
AC093673.5	ENSG00000232533.1	5260	2085	1021	8.32e-31
AC099668.5	ENSG00000259970.1	2330	10819	-1828	8.88e-35
AC104534.3	ENSG00000268083.5	5810	0.420	2262	2.16e-14
AC104809.2	ENSG00000223991.1	0.040	3375	-2073	2.01e-42
AC132217.4	ENSG00000240801.1	21110	365062	-4049	1.29e-12
AC138035.2	ENSG00000238035.8	0.600	3465	-1481	4.12e-37
AC239868.2	ENSG00000280874.1	22920	4910	2017	8.03e-30
AC239868.3	ENSG00000281134.1	22920	4910	2017	8.03e-30
ACACB	ENSG00000076555.15	8470	23610	-1378	3.15e-30
ACAD11	ENSG00000240303.7	12740	40844	-1607	4.38e-50
ACADL	ENSG00000115361.7	2900	8555	-1293	1.03e-28
ACADS	ENSG00000122971.8	39170	97480	-1294	1.57e-44
ACADVL	ENSG00000072778.19	359313	861913	-1260	4.18e-36
ACAP3	ENSG00000131584.18	7860	17300	-1046	7.23e-9
ACBD6	ENSG00000230124.6	24710	9845	1245	8.85e-69
ACCS	ENSG00000110455.13	6220	14189	-1073	2.03e-19
ACLY	ENSG00000131473.16	20910	8174	1256	3.79e-35
ACOT12	ENSG00000172497.8	13960	29518	-1029	6.74e-12
ACP5	ENSG00000102575.10	22770	9840	1133	5.98e-13
ACP6	ENSG00000162836.11	18600	8690	1016	2.38e-42
ACSL1	ENSG00000151726.13	129984	406580	-1638	4.91e-36
ACSL4	ENSG00000068366.19	33020	2355	3342	2.19e-39
ACSM1	ENSG00000166743.9	8560	1085	2197	6.52e-22
ACSM3	ENSG00000005187.11	18450	58215	-1606	4.92e-24
ACSM5	ENSG00000183549.10	28829	79263	-1428	2.95e-24
ACTN4	ENSG00000130402.11	102749	47200	1106	1.62e-39
ADAM15	ENSG00000143537.13	42241	16735	1286	1.11e-45
ADAMTS1	ENSG00000154734.14	3150	7810	-1086	3.98e-22
ADAMTS13	ENSG00000160323.18	2320	14475	-2221	5.03e-125
ADAMTS2	ENSG00000087116.13	1370	4445	-1200	1.82e-22
ADAMTSL2	ENSG00000197859.9	3150	11359	-1574	3.27e-32
ADAT2	ENSG00000189007.15	1230	3685	-1071	9.99e-21
ADCK2	ENSG00000133597.9	14490	5585	1234	4.04e-76
ADCY1	ENSG00000164742.14	0.400	4115	-1869	7.59e-41
ADGRA3	ENSG00000152990.13	8900	21525	-1186	7.36e-27
ADGRG7	ENSG00000144820.7	0.720	4425	-1657	5.97e-48
ADH1B	ENSG00000196616.12	360135	884396	-1294	1.98e-9
ADH4	ENSG00000198099.8	154032	549147	-1827	1.69e-12
ADIPOR1	ENSG00000159346.12	66791	32800	1004	9.46e-57
ADM2	ENSG00000128165.8	2800	0.750	1119	7.34e-21
ADRA1A	ENSG00000120907.17	0.750	16380	-3312	2.63e-97
ADRA1B	ENSG00000170214.3	1210	3855	-1135	1.08e-39
ADRA2B	ENSG00000274286.1	0.410	1885	-1033	4.88e-68
ADSL	ENSG00000239900.11	31910	14580	1079	5.15e-55
AF064858.6	ENSG00000205622.9	0.810	3285	-1243	8.49e-22
AFG3L1P	ENSG00000223959.8	3200	8220	-1134	3.98e-20
AFM	ENSG00000079557.4	50380	143334	-1490	5.52e-23
AFP	ENSG00000081051.7	11460	4685	1132	3.50e-16
AGAP4	ENSG00000188234.13	2280	5630	-1015	4.40e-16
AGAP5	ENSG00000172650.12	1110	3235	-1005	9.04e-21
AGAP6	ENSG00000204149.9	3380	12338	-1607	1.06e-23
AGAP9	ENSG00000204172.11	2160	10750	-1895	2.12e-30
AGBL5	ENSG00000084693.15	8210	3445	1051	5.03e-51
AGER	ENSG00000204305.13	1410	4070	-1073	1.74e-19
AGPAT1	ENSG00000204310.10	46821	21794	1069	9.03e-60
AGXT2	ENSG00000113492.13	13630	35030	-1300	1.30e-26
AHSA2	ENSG00000173209.22	10420	24350	-1150	6.81e-7
AIDA	ENSG00000186063.12	24519	10875	1104	1.87e-60
AIM1L	ENSG00000176092.13	1810	0.170	1264	2.14e-41
AIMP2	ENSG00000106305.9	27651	13260	1007	7.54e-44
AKAP17A	ENSG00000197976.10	10160	25474	-1246	6.85e-18
AKIP1	ENSG00000166452.11	12780	5335	1121	1.08e-62
AKR1B10	ENSG00000198074.9	177158	3015	5472	1.03e-35
AKR1C1	ENSG00000187134.12	481068	212636	1174	9.07e-10
AKR1C2	ENSG00000151632.16	299123	125148	1250	1.10e-5
AKR1C3	ENSG00000196139.11	351236	89588	1959	1.01e-55
AKR1C8P	ENSG00000264006.6	0.260	1740	-1121	3.41e-31
AKR1D1	ENSG00000122787.14	10960	40685	-1801	7.40e-11
AKR7L	ENSG00000211454.13	4430	14072	-1473	6.74e-44
AL158801.1	ENSG00000279392.1	2190	0.275	1323	6.71e-49
AL161668.5	ENSG00000258604.1	1630	5785	-1367	2.81e-23
AL162151.3	ENSG00000234648.1	202151	43611	2187	5.68e-5
ALDH1A1	ENSG00000165092.12	458284	217994	1068	6.85e-16
ALDH3A1	ENSG00000108602.17	2170	0.460	1119	5.70e-16
ALDH8A1	ENSG00000118514.13	27029	64679	-1229	1.24e-23
ALDOA	ENSG00000149925.16	289595	130929	1139	1.55e-26
ALG1	ENSG00000033011.11	19830	8770	1092	1.88e-73
ALG1L	ENSG00000189366.9	7270	0.325	2642	6.34e-54
ALG3	ENSG00000214160.9	57289	26005	1110	1.35e-58
ALG8	ENSG00000159063.12	45711	19841	1164	6.74e-84
ALKBH2	ENSG00000189046.10	25259	11915	1024	8.90e-45
ALMS1	ENSG00000116127.17	5000	1790	1105	4.65e-69
ALOX12P2	ENSG00000262943.7	1390	6128	-1577	1.58e-40
ALPL	ENSG00000162551.13	10670	40580	-1833	5.56e-33
ALYREF	ENSG00000183684.7	37749	13900	1379	3.46e-62
AMDHD1	ENSG00000139344.7	23480	51479	-1100	1.80e-18
AMN	ENSG00000166126.10	9840	21844	-1075	2.12e-8
ANAPC11	ENSG00000141552.17	192350	76061	1327	2.94e-80
ANGPTL6	ENSG00000130812.10	1670	11600	-2238	3.10e-116
ANK3	ENSG00000151150.20	1010	3435	-1142	3.23e-18
ANKRD29	ENSG00000154065.16	3480	0.610	1476	7.76e-38
ANKRD39	ENSG00000213337.8	14360	6270	1079	4.09e-78
ANLN	ENSG00000011426.10	2260	0.175	1472	7.60e-48
ANO10	ENSG00000160746.12	10950	4330	1165	1.84e-54
ANXA10	ENSG00000109511.10	10590	34340	-1608	1.48e-21
ANXA11	ENSG00000122359.17	86990	38454	1157	1.83e-49
ANXA13	ENSG00000104537.16	7520	2450	1304	6.99e-12
ANXA2	ENSG00000182718.16	254866	63065	1998	1.51e-55
ANXA2P2	ENSG00000231991.4	4420	0.755	1627	3.56e-50
AP000349.2	ENSG00000280178.1	1280	0.030	1146	2.60e-33
AP000355.2	ENSG00000228923.1	0.630	2280	-1009	5.61e-23
AP003391.1	ENSG00000281272.1	2060	0.000	1614	5.48e-7
AP006285.6	ENSG00000227306.1	0.470	2525	-1262	1.24e-19
AP006285.7	ENSG00000231487.1	0.060	1265	-1095	1.43e-63
AP1M2	ENSG00000129354.11	2830	0.560	1296	1.55e-18
AP1S1	ENSG00000106367.13	45540	17135	1360	1.08e-80
AP3B1	ENSG00000132842.13	16490	6325	1256	1.40e-87
APIP	ENSG00000149089.12	18439	8705	1002	3.76e-47
APLN	ENSG00000171388.11	1590	0.100	1235	4.03e-37
APOA1BP	ENSG00000163382.11	120684	38634	1618	9.12e-108
APOA2	ENSG00000158874.11	31278852	10880067	1523	1.58e-5
APOA4	ENSG00000110244.6	3030	26190	-2754	3.30e-9
APOA5	ENSG00000110243.11	97267	211834	-1115	8.01e-15
APOBEC3B	ENSG00000179750.15	2340	0.220	1453	4.84e-35
APOC2	ENSG00000234906.8	2260615	475779	2246	4.95e-19
APOE	ENSG00000130203.9	5880405	2771689	1085	2.71e-20
APOF	ENSG00000175336.9	17701	113668	-2616	5.05e-41
APOLD1	ENSG00000178878.12	4300	1215	1259	1.39e-34
AQP3	ENSG00000165272.14	24599	60915	-1274	4.82e-27
ARF1	ENSG00000143761.13	269025	132775	1013	6.68e-49
ARF3	ENSG00000134287.9	30759	14790	1008	1.32e-42
ARGLU1	ENSG00000134884.13	17771	38953	-1090	1.80e-11
ARHGAP10	ENSG00000071205.11	1860	5190	-1114	8.55e-27
ARHGEF39	ENSG00000137135.17	1810	0.400	1005	5.91e-37
ARL2	ENSG00000213465.7	24729	8940	1372	2.15e-47
ARPC1A	ENSG00000241685.8	87772	39045	1148	3.40e-73
ARPC1B	ENSG00000130429.12	99181	38330	1349	3.04e-35
ARPC3	ENSG00000111229.15	174634	81089	1097	4.33e-68
ARPC5	ENSG00000162704.15	86762	29820	1510	9.63e-73
ARRDC2	ENSG00000105643.9	15500	7085	1029	1.53e-16
ARSE	ENSG00000157399.14	49900	23000	1085	8.96e-10
ARSEP1	ENSG00000224060.3	2500	0.090	1683	1.88e-15
ARV1	ENSG00000173409.13	17670	8020	1049	1.67e-56
ASF1B	ENSG00000105011.8	3270	0.280	1738	2.51e-52
ASMTL-AS1	ENSG00000236017.7	3230	11100	-1516	3.14e-14
ASNA1	ENSG00000198356.11	43761	17964	1239	6.40e-68
ASPDH	ENSG00000204653.9	33751	71634	-1064	2.08e-11
ASPG	ENSG00000166183.15	7770	75475	-3124	3.70e-53
ASPH	ENSG00000198363.15	41040	16180	1291	1.17e-30
ASPM	ENSG00000066279.16	2960	0.125	1816	8.69e-62
ATAD2	ENSG00000156802.12	6910	1855	1470	1.02e-45
ATF3	ENSG00000162772.16	14940	36796	-1246	3.06e-15
ATF5	ENSG00000169136.8	145946	767753	-2387	5.77e-35
ATHL1	ENSG00000142102.15	9890	26485	-1336	1.89e-7
ATIC	ENSG00000138363.14	66201	32119	1021	6.32e-41
ATOH8	ENSG00000168874.12	4420	18950	-1880	1.01e-34
ATOX1	ENSG00000177556.11	347290	114178	1596	3.97e-78
ATP1A1	ENSG00000163399.15	136342	51872	1377	9.21e-39
ATP1B1	ENSG00000143153.12	97951	37295	1370	1.05e-40
ATP1B3	ENSG00000069849.10	21140	8200	1267	1.25e-20
ATP5E	ENSG00000124172.9	77471	33549	1184	5.62e-73
ATP5G1	ENSG00000159199.13	239967	89216	1417	5.98e-84
ATP5G2	ENSG00000135390.17	428751	189499	1174	1.55e-91
ATP5H	ENSG00000167863.11	378119	168709	1160	1.20e-88
ATP5J2	ENSG00000241468.7	584111	238425	1289	4.01e-93
ATP5J2-PTCD1	ENSG00000248919.7	3960	1075	1257	8.57e-47
ATP5L	ENSG00000167283.7	304183	126381	1261	2.46e-78
ATP6AP1	ENSG00000071553.16	65639	24015	1414	1.45e-89
ATP6V0B	ENSG00000117410.13	142339	68669	1041	4.21e-44
ATP6V0E1	ENSG00000113732.8	207691	99105	1060	2.08e-67
ATP6V1C1	ENSG00000155097.11	16800	6985	1157	4.28e-40
ATP6V1D	ENSG00000100554.11	38409	18475	1017	1.91e-54
ATP6V1E1	ENSG00000131100.12	67568	28939	1196	5.51e-67
ATP6V1F	ENSG00000128524.4	102047	36464	1460	6.33e-83
ATP6V1H	ENSG00000047249.16	23620	11170	1016	1.64e-54
ATRAID	ENSG00000138085.16	74109	34835	1068	2.76e-73
ATRN	ENSG00000088812.17	27481	10280	1336	1.58e-36
AURKA	ENSG00000087586.17	7350	0.990	2069	7.82e-61
AURKB	ENSG00000178999.12	5250	0.530	2030	1.84e-54
AUTS2	ENSG00000158321.15	3860	9375	-1094	1.65e-22
AVPR1A	ENSG00000166148.3	0.470	5405	-2123	1.66e-25
AZGP1	ENSG00000160862.12	569518	1221805	-1100	1.14e-17
AZGP1P1	ENSG00000214313.8	6430	19275	-1448	6.36e-37
B3GAT1	ENSG00000109956.12	0.110	1630	-1245	3.11e-12
B3GNT3	ENSG00000179913.10	2330	0.495	1155	1.07e-13
B3GNT5	ENSG00000176597.11	2300	0.450	1186	2.51e-22
B9D1	ENSG00000108641.14	10260	3880	1206	1.56e-44
BAG6	ENSG00000204463.12	179805	88398	1016	1.56e-63
BAMBI	ENSG00000095739.10	13810	6220	1036	1.02e-10
BANF1	ENSG00000175334.7	152165	69610	1117	1.23e-82
BAX	ENSG00000087088.19	78710	24245	1659	2.27e-75
BBOX1	ENSG00000129151.8	2690	11375	-1746	1.61e-10
BCAM	ENSG00000187244.10	57460	21915	1351	4.28e-31
BCAP31	ENSG00000185825.15	202657	70416	1512	1.24e-92
BCAS4	ENSG00000124243.17	1850	0.410	1015	2.98e-40
BCHE	ENSG00000114200.9	17321	38950	-1125	1.93e-11
BCL2L12	ENSG00000126453.9	19401	8030	1176	1.07e-58
BCL3	ENSG00000069399.12	31120	75011	-1243	1.12e-24
BCL6	ENSG00000113916.17	10780	24681	-1124	8.47e-20
BCO2	ENSG00000197580.11	2420	31444	-3246	3.72e-90
BEX2	ENSG00000133134.11	2480	0.685	1046	2.69e-12
BGN	ENSG00000182492.15	56790	133176	-1215	5.49e-17
BHMT	ENSG00000145692.14	58582	197176	-1734	9.48e-12
BIRC5	ENSG00000089685.14	6810	0.505	2376	4.03e-61
BLOC1S1	ENSG00000135441.7	213441	94870	1161	3.01e-91
BLVRA	ENSG00000106605.10	19460	3145	2303	4.89e-61
BMPER	ENSG00000164619.8	0.060	1515	-1246	5.62e-104
BMS1P8	ENSG00000260518.1	1920	0.110	1395	5.66e-33
BOLA1	ENSG00000178096.8	26790	11355	1169	2.85e-68
BOLA2	ENSG00000183336.7	10800	2740	1658	1.07e-68
BOLA2B	ENSG00000169627.7	84670	20260	2011	7.31e-92
BOLA3	ENSG00000163170.11	36339	13220	1393	7.42e-78
BOP1	ENSG00000261236.5	28041	9040	1532	1.32e-56
BPGM	ENSG00000172331.11	8150	3535	1013	1.99e-53
BPNT1	ENSG00000162813.17	13670	6010	1065	7.03e-46
BRIX1	ENSG00000113460.12	13000	5580	1089	8.42e-48
BRMS1	ENSG00000174744.13	30751	11850	1305	1.80e-82
BROX	ENSG00000162819.11	10950	4735	1059	4.93e-56
BSG	ENSG00000172270.18	301329	101335	1563	2.43e-75
BTF3	ENSG00000145741.15	338660	168376	1004	1.02e-59
BTG3	ENSG00000154640.14	8550	3095	1222	9.17e-34
BUB1	ENSG00000169679.14	1720	0.110	1293	1.65e-47
BUB1B	ENSG00000156970.12	1600	0.160	1164	1.52e-39
BUD31	ENSG00000106245.9	64382	29160	1116	2.43e-64
BX842568.1	ENSG00000235510.1	0.400	2485	-1316	1.34e-39
BYSL	ENSG00000112578.9	12530	4635	1264	3.98e-53
BZW2	ENSG00000136261.14	15300	6630	1095	1.43e-43
C10orf35	ENSG00000171224.8	3840	1375	1027	5.79e-19
C11orf96	ENSG00000187479.5	6790	26472	-1818	4.00e-35
C11orf98	ENSG00000278615.4	63592	30650	1029	3.50e-58
C12orf45	ENSG00000151131.9	19500	8885	1052	3.65e-70
C12orf73	ENSG00000204954.9	7320	2955	1073	1.95e-67
C12orf75	ENSG00000235162.8	6370	1335	1658	1.63e-24
C14orf105	ENSG00000100557.9	5670	19307	-1606	1.26e-30
C14orf166	ENSG00000087302.8	107940	52815	1017	3.49e-79
C14orf180	ENSG00000184601.10	0.010	1210	-1130	9.80e-59
C15orf39	ENSG00000167173.18	4460	1500	1127	7.99e-38
C15orf40	ENSG00000169609.13	15500	7065	1033	2.60e-65
C15orf48	ENSG00000166920.10	3020	0.550	1375	6.27e-15
C16orf59	ENSG00000162062.14	2190	0.370	1219	1.83e-42
C17orf49	ENSG00000258315.5	55241	23970	1171	2.43e-50
C17orf58	ENSG00000186665.8	10870	4220	1185	2.21e-73
C17orf89	ENSG00000224877.3	74470	35490	1048	3.78e-52
C19orf48	ENSG00000167747.13	26670	11515	1145	1.43e-37
C19orf53	ENSG00000104979.8	130861	56883	1188	5.86e-77
C19orf66	ENSG00000130813.17	42679	100513	-1217	2.43e-44
C1orf106	ENSG00000163362.10	1810	0.260	1157	6.98e-23
C1orf168	ENSG00000187889.12	3310	11729	-1562	3.02e-43
C1orf198	ENSG00000119280.16	12460	4765	1223	3.20e-32
C1orf228	ENSG00000198520.10	1790	6188	-1365	9.28e-42
C1orf35	ENSG00000143793.12	12700	5775	1016	9.33e-48
C1orf43	ENSG00000143612.18	182214	81021	1159	3.42e-82
C1orf54	ENSG00000118292.8	7230	2655	1171	6.43e-33
C1QA	ENSG00000173372.16	81492	39245	1035	3.53e-17
C1QTNF1	ENSG00000173918.14	4540	17865	-1768	2.97e-28
C1QTNF5	ENSG00000223953.4	11430	5080	1032	2.60e-26
C1R	ENSG00000159403.15	414692	877009	-1079	2.62e-24
C1RL-AS1	ENSG00000205885.7	1810	5113	-1121	3.80e-19
C20orf27	ENSG00000101220.17	22110	9443	1146	5.92e-57
C2orf54	ENSG00000172478.17	6440	2305	1171	5.16e-9
C3P1	ENSG00000167798.16	11360	51089	-2075	8.75e-52
C4A-AS1	ENSG00000233627.2	2720	10738	-1658	1.20e-37
C4B-AS1	ENSG00000229776.1	2720	10738	-1658	1.20e-37
C6	ENSG00000039537.13	47422	120137	-1323	3.56e-20
C6orf1	ENSG00000186577.11	20870	9290	1088	4.09e-48
C6orf47	ENSG00000204439.3	10630	4240	1150	2.15e-44
C6orf48	ENSG00000204387.12	78378	31529	1287	3.69e-47
C6orf89	ENSG00000198663.16	20281	9085	1077	3.12e-50
C7	ENSG00000112936.18	5880	49485	-2875	1.70e-35
C7orf50	ENSG00000146540.14	47619	20535	1175	7.81e-59
C8A	ENSG00000157131.10	73338	173446	-1231	5.79e-22
C8orf33	ENSG00000182307.12	18379	7305	1223	1.70e-57
C8orf4	ENSG00000176907.4	12810	58630	-2110	6.76e-46
C8orf46	ENSG00000169085.11	1620	5510	-1313	3.08e-24
C8orf59	ENSG00000176731.11	87069	34170	1324	2.20e-73
C8orf76	ENSG00000189376.11	19810	8225	1174	7.31e-64
C9	ENSG00000113600.10	23051	263854	-3461	2.29e-39
C9orf16	ENSG00000171159.4	50801	23865	1059	4.91e-45
CACNA1H	ENSG00000196557.10	1510	5300	-1328	2.19e-6
CACNB2	ENSG00000165995.18	0.740	2575	-1039	3.70e-27
CACYBP	ENSG00000116161.17	43419	15510	1428	2.85e-47
CADM1	ENSG00000182985.16	40070	14410	1414	1.57e-29
CALM3	ENSG00000160014.16	104213	50399	1033	1.09e-45
CALR	ENSG00000179218.13	813782	337302	1268	2.97e-61
CAMK2B	ENSG00000058404.19	0.240	2310	-1416	2.83e-37
CANT1	ENSG00000171302.16	14810	6460	1084	4.71e-47
CANX	ENSG00000127022.14	179830	85843	1058	6.82e-39
CAP2	ENSG00000112186.11	8860	1345	2072	2.31e-66
CAPG	ENSG00000042493.15	26600	3725	2546	3.78e-46
CAPN2	ENSG00000162909.17	26330	11385	1142	1.96e-33
CAPN3	ENSG00000092529.22	3250	13150	-1735	4.36e-41
CAPNS1	ENSG00000126247.10	328510	144006	1184	3.52e-76
CAPRIN1	ENSG00000135387.19	35170	17019	1005	8.42e-44
CASC5	ENSG00000137812.19	3480	1025	1146	2.11e-31
CASK	ENSG00000147044.20	8900	3435	1159	2.68e-35
CAV1	ENSG00000105974.11	11490	4810	1104	7.92e-31
CBFA2T3	ENSG00000129993.14	0.570	2535	-1171	6.65e-48
CBR1	ENSG00000159228.12	181056	75123	1258	1.34e-31
CBS	ENSG00000274276.4	4020	13905	-1570	2.09e-6
CBX1	ENSG00000108468.14	14330	5675	1200	1.79e-43
CBX8	ENSG00000141570.10	4540	1570	1108	3.04e-47
CCBE1	ENSG00000183287.13	0.060	1185	-1044	4.85e-72
CCDC107	ENSG00000159884.11	40179	15745	1298	6.60e-69
CCDC167	ENSG00000198937.8	49179	20844	1200	3.35e-58
CCDC28B	ENSG00000160050.14	3800	1310	1055	1.51e-28
CCDC34	ENSG00000109881.16	5740	1220	1602	2.55e-63
CCDC64	ENSG00000135127.11	4250	1510	1065	4.55e-14
CCDC80	ENSG00000091986.15	4300	1310	1198	7.04e-13
CCDC84	ENSG00000186166.8	6330	15905	-1206	1.54e-11
CCDC86	ENSG00000110104.11	12320	4795	1201	8.13e-45
CCHCR1	ENSG00000204536.13	11720	4520	1204	2.36e-46
CCL14	ENSG00000276409.4	7250	46812	-2535	1.53e-35
CCL15	ENSG00000275718.1	29421	9305	1562	1.65e-31
CCL18	ENSG00000275385.1	2040	0.510	1010	7.06e-16
CCL19	ENSG00000172724.11	2700	8890	-1418	1.12e-7
CCL20	ENSG00000115009.11	22420	1500	3228	4.75e-23
CCL21	ENSG00000137077.7	7730	17895	-1114	1.24e-6
CCL23	ENSG00000274736.4	0.220	2155	-1371	7.35e-76
CCNA2	ENSG00000145386.9	2960	0.455	1445	1.73e-40
CCNB1	ENSG00000134057.14	14800	0.900	3056	6.68e-83
CCNB2	ENSG00000157456.7	4810	0.270	2194	3.72e-65
CCNE1	ENSG00000105173.13	1550	0.220	1064	1.59e-29
CCNL1	ENSG00000163660.11	21840	60633	-1432	8.07e-33
CCNL2	ENSG00000221978.11	33029	101006	-1584	3.99e-19
CCT3	ENSG00000163468.14	185734	51090	1842	8.68e-107
CCT4	ENSG00000115484.14	57519	25355	1151	1.65e-64
CCT5	ENSG00000150753.11	82509	34429	1237	3.87e-51
CCT6A	ENSG00000146731.10	83169	34536	1244	4.26e-52
CCT7	ENSG00000135624.15	105829	49213	1089	4.47e-75
CD151	ENSG00000177697.17	152704	70965	1095	7.04e-34
CD163L1	ENSG00000177675.8	2630	0.490	1285	1.81e-37
CD1D	ENSG00000158473.6	1310	5540	-1501	3.08e-41
CD24	ENSG00000272398.5	50850	6745	2743	2.71e-16
CD248	ENSG00000174807.3	3790	1195	1126	7.71e-32
CD2BP2	ENSG00000169217.8	24970	9890	1254	5.53e-69
CD320	ENSG00000167775.10	20330	9475	1026	2.22e-45
CD34	ENSG00000174059.16	14170	1625	2531	4.55e-119
CD36	ENSG00000135218.17	16320	7178	1083	6.24e-16
CD3D	ENSG00000167286.9	4120	1295	1158	1.00e-22
CD5L	ENSG00000073754.5	1350	3725	-1008	9.99e-9
CD63	ENSG00000135404.11	685588	273832	1321	1.04e-69
CD74	ENSG00000019582.14	753727	185354	2018	1.26e-38
CDA	ENSG00000158825.5	15420	32819	-1042	1.77e-20
CDC123	ENSG00000151465.13	33160	16075	1000	2.68e-55
CDC20	ENSG00000117399.13	9320	0.310	2978	5.17e-71
CDC25C	ENSG00000158402.18	1840	0.055	1429	7.79e-58
CDC45	ENSG00000093009.9	3070	0.320	1624	1.72e-46
CDC6	ENSG00000094804.9	2440	0.365	1334	6.85e-31
CDCA3	ENSG00000111665.11	5670	0.685	1985	7.21e-54
CDCA5	ENSG00000146670.9	3890	0.275	1939	5.25e-62
CDCA8	ENSG00000134690.10	2690	0.290	1516	4.92e-49
CDH13	ENSG00000140945.15	3250	0.320	1687	8.79e-84
CDHR2	ENSG00000074276.10	1820	16165	-2606	2.83e-32
CDK1	ENSG00000170312.15	6320	0.330	2460	1.75e-69
CDK11A	ENSG00000008128.22	11850	26269	-1086	6.90e-17
CDK4	ENSG00000135446.16	47330	19380	1246	3.48e-52
CDK5	ENSG00000164885.12	12800	4670	1283	5.50e-79
CDKN2A	ENSG00000147889.16	10790	0.315	3164	4.86e-77
CDKN2AIPNL	ENSG00000237190.3	16910	6300	1295	1.12e-87
CDKN2B	ENSG00000147883.10	2030	0.370	1145	2.58e-40
CDKN2C	ENSG00000123080.10	7910	1415	1883	3.65e-64
CDKN3	ENSG00000100526.19	10960	0.450	3044	7.09e-82
CDT1	ENSG00000167513.8	3680	0.265	1887	1.67e-56
CENPA	ENSG00000115163.14	2090	0.120	1464	6.10e-50
CENPF	ENSG00000117724.12	6140	0.295	2463	2.11e-63
CENPH	ENSG00000153044.9	3040	0.590	1345	1.68e-57
CENPK	ENSG00000123219.12	1510	0.240	1017	2.52e-36
CENPL	ENSG00000120334.15	1820	0.340	1073	3.43e-49
CENPM	ENSG00000100162.14	5970	0.330	2390	1.74e-64
CENPN	ENSG00000166451.13	6100	2080	1205	1.16e-46
CENPU	ENSG00000151725.11	4690	0.885	1594	6.10e-48
CENPW	ENSG00000203760.8	8100	1100	2115	3.34e-70
CEP131	ENSG00000141577.13	5980	2185	1132	4.99e-49
CES3	ENSG00000172828.12	7320	16224	-1050	1.80e-15
CES4A	ENSG00000172824.14	1930	10081	-1919	7.21e-33
CETN2	ENSG00000147400.8	20930	9260	1096	4.53e-58
CFHR3	ENSG00000116785.13	33541	174664	-2346	3.44e-19
CFL1	ENSG00000172757.12	437093	184272	1242	6.72e-68
CFP	ENSG00000126759.12	2320	8934	-1581	6.16e-36
CGREF1	ENSG00000138028.14	9800	4105	1081	2.46e-14
CH17-13I23.3	ENSG00000277702.1	1300	0.105	1058	1.08e-11
CH17-340M24.3	ENSG00000197180.2	9380	4110	1022	1.74e-52
CHAF1A	ENSG00000167670.15	5120	1390	1357	1.06e-59
CHCHD3	ENSG00000106554.11	24450	10515	1144	3.58e-47
CHCHD6	ENSG00000159685.10	8610	3590	1066	2.38e-61
CHEK1	ENSG00000149554.12	2380	0.480	1191	2.59e-43
CHMP2A	ENSG00000130724.8	166352	74886	1141	5.81e-89
CHMP4B	ENSG00000101421.3	57181	27285	1041	7.29e-54
CHRD	ENSG00000090539.15	9550	72098	-2793	1.15e-44
CHRNA4	ENSG00000101204.15	0.330	12095	-3300	8.08e-43
CHST4	ENSG00000140835.9	0.030	1585	-1327	6.97e-19
CIDEB	ENSG00000136305.11	62721	137997	-1125	7.75e-24
CITED2	ENSG00000164442.9	16549	36750	-1105	6.08e-25
CKAP2	ENSG00000136108.14	3090	0.855	1141	2.02e-41
CKAP4	ENSG00000136026.13	32450	11110	1466	5.09e-49
CKB	ENSG00000166165.12	26379	10115	1301	5.07e-15
CKLF	ENSG00000217555.12	29829	9115	1608	4.75e-78
CKS1B	ENSG00000173207.12	71878	24695	1504	9.94e-69
CKS1BP3	ENSG00000268942.2	5440	0.475	2126	7.07e-70
CKS2	ENSG00000123975.4	31349	8620	1750	9.91e-52
CLASRP	ENSG00000104859.14	20340	45469	-1123	1.49e-9
CLDN10	ENSG00000134873.9	0.100	1760	-1327	1.08e-6
CLDN15	ENSG00000106404.13	24411	8805	1374	2.22e-19
CLDN2	ENSG00000165376.10	5480	16855	-1462	1.36e-5
CLDN7	ENSG00000181885.18	35240	14474	1228	2.04e-10
CLEC14A	ENSG00000176435.6	7720	3055	1105	7.62e-35
CLEC1B	ENSG00000165682.14	0.030	8658	-3229	8.59e-105
CLEC4G	ENSG00000182566.12	0.120	23634	-4459	2.36e-132
CLEC4M	ENSG00000104938.16	0.020	18949	-4290	1.13e-181
CLGN	ENSG00000153132.12	2200	0.600	1000	3.61e-13
CLIC1	ENSG00000213719.8	143867	43331	1708	2.75e-57
CLN3	ENSG00000188603.16	58809	19355	1555	8.03e-82
CLN6	ENSG00000128973.11	19690	9180	1023	1.38e-57
CLRN3	ENSG00000180745.4	4000	14575	-1639	9.44e-16
CLTA	ENSG00000122705.16	122402	57029	1089	1.06e-58
CMSS1	ENSG00000184220.10	13650	5695	1130	1.93e-51
CMTM7	ENSG00000153551.13	8100	3550	1000	7.49e-20
CNDP1	ENSG00000150656.14	0.490	17989	-3672	3.80e-68
CNIH4	ENSG00000143771.11	32810	10014	1618	1.16e-77
CNPY2	ENSG00000257727.5	165673	75695	1120	8.53e-85
CNTFR	ENSG00000122756.14	0.490	3555	-1612	3.75e-11
CNTN3	ENSG00000113805.8	0.080	2035	-1491	5.64e-58
COA3	ENSG00000183978.7	130119	62989	1035	2.02e-60
COA6	ENSG00000168275.14	53471	13715	1888	6.38e-113
COCH	ENSG00000100473.15	1420	0.180	1036	2.59e-26
COL15A1	ENSG00000204291.10	3030	0.170	1784	2.27e-63
COL1A1	ENSG00000108821.13	28300	10504	1349	4.25e-11
COL1A2	ENSG00000164692.17	29910	12124	1236	1.02e-11
COL27A1	ENSG00000196739.14	6030	16685	-1331	3.06e-17
COL4A1	ENSG00000187498.14	26299	4465	2321	5.10e-52
COL4A2	ENSG00000134871.17	30359	7015	1968	8.05e-45
COLEC10	ENSG00000184374.2	0.390	12865	-3318	1.03e-112
COLEC11	ENSG00000118004.17	18710	53509	-1468	1.84e-26
COMMD4	ENSG00000140365.15	110170	35546	1605	6.49e-117
COMMD5	ENSG00000170619.9	24380	9165	1320	3.17e-79
COPA	ENSG00000122218.14	47009	19744	1211	2.91e-40
COPG2	ENSG00000158623.14	6000	2180	1138	1.33e-48
COPS6	ENSG00000168090.9	83707	38084	1116	4.87e-85
COPZ1	ENSG00000111481.9	81882	40161	1010	1.89e-62
CORO1B	ENSG00000172725.13	47550	23209	1004	8.64e-45
COX20	ENSG00000203667.9	40969	18425	1111	7.59e-57
COX4I2	ENSG00000131055.4	3100	0.330	1624	7.60e-85
COX6A1	ENSG00000111775.2	639100	304795	1066	2.20e-76
COX6A2	ENSG00000156885.5	2460	6190	-1055	7.92e-11
COX6B1	ENSG00000126267.8	407285	148543	1449	4.15e-81
COX6B1P4	ENSG00000253813.1	0.000	1055	-1039	2.49e-94
COX6C	ENSG00000164919.10	582170	237502	1290	3.35e-71
COX7A2	ENSG00000112695.11	317364	149805	1078	7.89e-55
COX7B	ENSG00000131174.4	168510	73211	1192	1.60e-72
COX7C	ENSG00000127184.10	750183	309093	1276	4.27e-81
COX7CP1	ENSG00000235957.1	0.000	1532	-1340	1.13e-20
COX8A	ENSG00000176340.3	396560	187065	1080	3.66e-67
CPD	ENSG00000108582.11	16511	6295	1263	1.36e-30
CPE	ENSG00000109472.13	15740	4685	1558	1.33e-31
CPEB3	ENSG00000107864.14	1110	3710	-1158	4.94e-47
CPED1	ENSG00000106034.17	3010	7330	-1055	5.24e-26
CPQ	ENSG00000104324.15	47940	14525	1656	1.26e-79
CPSF3	ENSG00000119203.13	13290	5940	1042	4.29e-73
CPT1B	ENSG00000205560.12	5210	13954	-1268	8.77e-13
CPVL	ENSG00000106066.13	14500	2755	2045	4.04e-32
CRHBP	ENSG00000145708.10	0.560	16829	-3515	4.57e-81
CRIP1	ENSG00000213145.9	26359	7010	1772	1.43e-31
CRNDE	ENSG00000245694.8	4620	0.500	1906	3.28e-35
CRNKL1	ENSG00000101343.14	13850	5900	1106	1.04e-77
CROCCP2	ENSG00000282056.1	2910	7045	-1041	2.89e-29
CRP	ENSG00000132693.12	251671	2792323	-3467	1.20e-17
CRTAP	ENSG00000170275.14	47310	22299	1052	1.70e-33
CSAD	ENSG00000139631.18	14780	44387	-1524	1.13e-35
CSE1L	ENSG00000124207.16	21240	8830	1178	2.17e-64
CSF3R	ENSG00000119535.17	1430	6905	-1702	4.83e-39
CSNK2B	ENSG00000204435.13	182771	79873	1184	1.11e-80
CSRNP1	ENSG00000144655.14	7190	23779	-1597	1.52e-36
CSTB	ENSG00000160213.5	62012	30300	1009	1.55e-25
CSTF2	ENSG00000101811.13	4470	1560	1095	3.45e-44
CTB-25B13.12	ENSG00000267317.2	9200	3654	1132	4.70e-59
CTB-50L17.14	ENSG00000267385.1	1120	5205	-1549	8.09e-36
CTB-63M22.1	ENSG00000229119.3	136882	29105	2195	1.12e-24
CTB-79E8.3	ENSG00000253683.1	0.000	2140	-1651	4.75e-39
CTB-89H12.4	ENSG00000230551.4	1400	3940	-1041	4.53e-23
CTC-246B18.10	ENSG00000269246.1	5760	1865	1238	8.66e-28
CTC-505O3.2	ENSG00000248709.1	2900	11220	-1648	1.28e-10
CTC-524C5.2	ENSG00000263272.1	0.710	3425	-1372	1.14e-36
CTC-529I10.1	ENSG00000275413.1	0.660	3140	-1318	1.69e-54
CTD-2240E14.4	ENSG00000267387.1	0.300	2590	-1465	5.19e-74
CTD-2537I9.12	ENSG00000267523.1	1460	8730	-1984	3.84e-31
CTD-2540B15.11	ENSG00000267580.1	125400	57014	1124	1.01e-21
CTD-2619J13.27	ENSG00000273901.1	1410	6110	-1561	6.00e-32
CTD-2619J13.5	ENSG00000279611.1	1390	8145	-1936	1.01e-33
CTD-2619J13.8	ENSG00000268230.5	1950	6439	-1334	1.74e-25
CTD-3080P12.3	ENSG00000249201.2	0.440	3790	-1734	2.18e-41
CTD-3092A11.2	ENSG00000270055.1	2470	9255	-1563	1.74e-39
CTHRC1	ENSG00000164932.12	2350	0.245	1428	5.65e-29
CTNNA1	ENSG00000044115.20	88812	42721	1039	9.68e-53
CTNNBL1	ENSG00000132792.18	45379	20990	1077	5.86e-43
CTSA	ENSG00000064601.16	181974	53563	1746	1.49e-88
CTSC	ENSG00000109861.15	35961	14130	1289	5.41e-29
CTSD	ENSG00000117984.12	769138	382084	1007	3.15e-42
CTSH	ENSG00000103811.15	163460	77630	1065	3.63e-27
CTSS	ENSG00000163131.10	37281	13980	1354	9.90e-19
CUEDC1	ENSG00000180891.12	7880	3190	1084	3.15e-32
CUTA	ENSG00000112514.15	288894	108548	1404	5.23e-94
CXCL10	ENSG00000169245.5	11720	1145	2568	7.51e-32
CXCL12	ENSG00000107562.16	11660	60325	-2276	5.75e-46
CXCL14	ENSG00000145824.12	0.190	14215	-3676	8.11e-97
CXCL2	ENSG00000081041.8	18181	119784	-2655	1.12e-59
CXCL9	ENSG00000138755.5	4180	0.765	1553	2.88e-21
CXorf36	ENSG00000147113.16	2250	0.320	1300	1.21e-77
CYB5R1	ENSG00000159348.12	47698	20285	1194	1.35e-66
CYC1	ENSG00000179091.4	157324	75334	1052	4.11e-57
CYP1A1	ENSG00000140465.13	0.970	4710	-1535	5.28e-4
CYP1A2	ENSG00000140505.6	0.480	44130	-4930	6.56e-40
CYP21A1P	ENSG00000204338.8	2250	6150	-1137	1.79e-10
CYP21A2	ENSG00000231852.6	5800	14850	-1221	1.28e-14
CYP26A1	ENSG00000095596.11	0.280	4960	-2219	4.48e-51
CYP2A6	ENSG00000255974.6	132862	592285	-2148	2.24e-12
CYP2A7	ENSG00000198077.10	1970	29830	-3376	5.55e-18
CYP2B6	ENSG00000197408.8	15260	76219	-2248	9.02e-27
CYP2B7P	ENSG00000256612.7	5240	14939	-1353	6.58e-5
CYP2C19	ENSG00000165841.9	0.330	6810	-2554	3.67e-62
CYP2C8	ENSG00000138115.13	85017	509168	-2568	9.37e-30
CYP2C9	ENSG00000138109.9	134596	470368	-1798	1.48e-18
CYP2D7	ENSG00000205702.10	19040	65650	-1734	5.22e-17
CYP2E1	ENSG00000130649.9	500525	2526544	-2333	8.84e-21
CYP39A1	ENSG00000146233.7	3250	17415	-2115	3.01e-28
CYP3A4	ENSG00000160868.14	31139	386278	-3591	7.90e-16
CYP3A43	ENSG00000021461.16	0.750	2875	-1147	4.30e-15
CYP3A5	ENSG00000106258.13	100148	212607	-1078	2.12e-7
CYP4A11	ENSG00000187048.12	108217	299559	-1460	1.15e-15
CYP4A22	ENSG00000162365.11	23290	77329	-1689	6.72e-20
CYP7A1	ENSG00000167910.3	10650	1939	1987	4.74e-12
CYP8B1	ENSG00000180432.5	34489	127326	-1854	5.97e-23
CYR61	ENSG00000142871.15	14110	53815	-1859	1.21e-36
CYSTM1	ENSG00000120306.9	72781	21570	1709	3.08e-73
CYTH2	ENSG00000105443.13	23180	9760	1168	7.31e-61
DAD1	ENSG00000129562.10	207245	96907	1089	8.49e-78
DAP3	ENSG00000132676.15	95378	39351	1256	8.89e-82
DAPK2	ENSG00000035664.11	4370	1105	1351	2.22e-44
DARS2	ENSG00000117593.9	10480	3105	1484	8.61e-66
DAXX	ENSG00000204209.10	23620	10495	1099	2.88e-47
DBH	ENSG00000123454.10	0.560	10785	-2917	5.99e-119
DBH-AS1	ENSG00000225756.1	5100	20855	-1841	2.63e-30
DBN1	ENSG00000113758.13	4760	1490	1210	4.06e-26
DBNDD1	ENSG00000003249.13	11410	2120	1992	2.23e-42
DBNDD2	ENSG00000244274.7	8350	3465	1066	9.63e-27
DBP	ENSG00000105516.10	18810	6130	1474	4.07e-42
DCAF13	ENSG00000164934.13	17179	6265	1323	2.03e-54
DCDC2	ENSG00000146038.11	2380	0.620	1061	6.93e-16
DCK	ENSG00000156136.9	3950	1415	1035	3.63e-36
DCN	ENSG00000011465.16	14870	101289	-2688	6.92e-35
DCTN2	ENSG00000175203.15	55341	26620	1028	7.26e-42
DCTPP1	ENSG00000179958.8	22201	9240	1180	2.59e-64
DDAH2	ENSG00000213722.8	45041	19780	1148	9.67e-40
DDOST	ENSG00000244038.9	104220	48816	1079	1.24e-43
DDX3Y	ENSG00000067048.16	3680	8605	-1037	1.68e-4
DDX41	ENSG00000183258.11	59511	26050	1162	9.72e-77
DEFA1	ENSG00000206047.2	0.090	2755	-1784	2.72e-61
DEFA1B	ENSG00000240247.6	0.000	2350	-1744	3.16e-65
DEFA3	ENSG00000239839.5	0.000	1345	-1230	4.13e-47
DEPTOR	ENSG00000155792.9	9300	3985	1047	1.72e-37
DERL1	ENSG00000136986.9	56191	26628	1050	6.69e-50
DES	ENSG00000175084.11	0.190	2725	-1646	2.17e-51
DHFRP1	ENSG00000188985.6	2310	0.635	1018	1.85e-15
DHODH	ENSG00000102967.11	14040	49561	-1749	2.57e-53
DHRS7	ENSG00000100612.13	80309	37900	1064	7.79e-29
DHX9	ENSG00000135829.16	41550	19855	1029	1.33e-50
DIO3OS	ENSG00000258498.6	0.410	4344	-1922	1.15e-38
DIRAS3	ENSG00000162595.4	0.250	2305	-1403	2.61e-44
DLGAP1-AS1	ENSG00000177337.7	7940	2765	1248	6.20e-35
DLGAP5	ENSG00000126787.12	1410	0.070	1171	1.34e-44
DLL4	ENSG00000128917.6	3790	1165	1146	1.37e-39
DNAJB11	ENSG00000090520.10	145411	63964	1172	1.18e-68
DNAJC12	ENSG00000108176.14	6660	21085	-1528	6.04e-25
DNAJC19P9	ENSG00000258608.1	2020	0.425	1084	4.23e-29
DNASE1L3	ENSG00000163687.13	6640	39306	-2399	6.98e-38
DNASE2	ENSG00000105612.8	32070	13445	1195	2.18e-39
DNHD1	ENSG00000179532.12	1450	6529	-1620	6.02e-31
DNPH1	ENSG00000112667.12	125600	57579	1112	3.54e-61
DOCK5	ENSG00000147459.17	2040	5980	-1199	3.07e-30
DOLK	ENSG00000175283.7	10080	4420	1032	2.81e-71
DPCD	ENSG00000166171.12	7670	3150	1063	9.56e-49
DPH1	ENSG00000108963.17	10360	22265	-1034	2.71e-27
DPM3	ENSG00000179085.7	133610	60894	1121	2.94e-52
DPP3	ENSG00000254986.7	21580	10230	1008	2.92e-45
DPP4	ENSG00000197635.9	19360	5345	1682	2.12e-26
DPT	ENSG00000143196.4	0.550	6090	-2194	2.82e-31
DPY30	ENSG00000162961.13	58651	25860	1151	7.28e-91
DRAP1	ENSG00000175550.7	101391	38361	1379	3.08e-99
DRG1	ENSG00000185721.11	40159	18460	1081	3.92e-70
DSN1	ENSG00000149636.15	7320	2660	1185	5.69e-53
DTD1	ENSG00000125821.11	10720	4720	1035	6.96e-26
DTL	ENSG00000143476.17	2230	0.145	1496	1.51e-48
DTNA	ENSG00000134769.21	6140	0.990	1843	3.41e-33
DTNBP1	ENSG00000047579.19	8480	3670	1021	6.86e-37
DTX1	ENSG00000135144.7	4030	11335	-1294	2.09e-22
DTX4	ENSG00000110042.7	3770	8570	-1005	5.97e-15
DTYMK	ENSG00000168393.12	19680	7140	1345	5.06e-61
DUSP1	ENSG00000120129.5	76452	213619	-1470	4.38e-28
DUSP23	ENSG00000158716.8	131497	63760	1033	4.20e-38
DUSP9	ENSG00000130829.17	2140	0.270	1306	7.69e-30
DUXAP8	ENSG00000206195.10	1890	0.225	1238	2.36e-33
DYNC1H1	ENSG00000197102.10	65922	29810	1119	8.87e-65
DYNLL1	ENSG00000088986.10	246304	98267	1317	5.74e-69
DYNLRB1	ENSG00000125971.16	145139	51949	1465	2.07e-100
E2F1	ENSG00000101412.12	5490	0.280	2342	8.39e-64
EBF4	ENSG00000088881.20	2550	6540	-1087	2.91e-12
ECHDC2	ENSG00000121310.16	148549	458109	-1618	4.09e-56
ECM1	ENSG00000143369.14	2510	17755	-2418	8.30e-77
ECSCR	ENSG00000249751.3	6800	2270	1254	1.11e-40
ECT2	ENSG00000114346.13	3000	0.610	1313	5.57e-37
EEF1A1P5	ENSG00000196205.8	63341	26253	1239	1.20e-22
EEF1A1P6	ENSG00000233476.3	11700	3450	1513	2.31e-43
EEF1A2	ENSG00000101210.10	7090	0.450	2480	1.75e-18
EEF1D	ENSG00000104529.17	621107	280430	1144	2.14e-50
EEF1G	ENSG00000254772.9	721421	356435	1015	3.44e-57
EFCAB11	ENSG00000140025.15	4050	1510	1009	6.64e-59
EFHD1	ENSG00000115468.11	5260	17155	-1536	3.68e-10
EFNA4	ENSG00000243364.7	8270	2885	1255	3.19e-55
EFTUD2	ENSG00000108883.12	32139	14380	1107	1.74e-68
EGR1	ENSG00000120738.7	18640	44085	-1199	6.29e-11
EHD4	ENSG00000103966.9	9790	3770	1178	1.72e-28
EHMT2	ENSG00000204371.11	23360	8135	1415	1.60e-68
EIF2D	ENSG00000143486.15	30789	13130	1170	6.56e-74
EIF3CL	ENSG00000205609.12	33160	14540	1136	7.26e-49
EIF3D	ENSG00000100353.17	84829	35248	1244	3.20e-65
EIF3E	ENSG00000104408.9	194253	69545	1469	3.99e-59
EIF3H	ENSG00000147677.10	142754	54924	1362	6.77e-64
EIF3K	ENSG00000178982.9	205429	85005	1263	1.32e-87
EIF3M	ENSG00000149100.12	133963	61922	1101	3.23e-63
EIF4BP7	ENSG00000225031.1	1680	0.340	1000	3.69e-59
EIF5AP4	ENSG00000234743.1	3950	0.160	2093	5.44e-57
EIF6	ENSG00000242372.6	180305	77275	1212	1.93e-78
ELOVL1	ENSG00000066322.12	37600	17105	1092	1.35e-45
ELOVL2	ENSG00000197977.3	17600	4335	1802	1.00e-24
EMC2	ENSG00000104412.7	31990	14010	1136	1.72e-53
EMC3	ENSG00000125037.12	74279	28660	1344	2.94e-74
EMC4	ENSG00000128463.12	77299	36715	1054	1.95e-85
EMCN	ENSG00000164035.9	3890	1220	1139	6.08e-36
EMP1	ENSG00000134531.9	7720	3295	1022	5.28e-11
ENAH	ENSG00000154380.16	10650	2805	1614	9.53e-39
ENGASE	ENSG00000167280.16	5900	13544	-1076	1.64e-10
ENO3	ENSG00000108515.17	11360	58100	-2258	3.58e-37
ENPP2	ENSG00000136960.12	14990	3555	1812	3.86e-30
ENSA	ENSG00000143420.17	109949	44470	1287	2.59e-76
ENY2	ENSG00000120533.12	127009	62880	1003	6.06e-60
EPHX1	ENSG00000143819.12	1532848	505370	1599	6.26e-25
EPHX2	ENSG00000120915.13	47891	106244	-1133	2.72e-18
EPO	ENSG00000130427.2	0.190	3185	-1814	8.10e-28
EPOR	ENSG00000187266.13	2570	7270	-1212	8.67e-30
EPRS	ENSG00000136628.17	37111	13560	1388	3.34e-68
EPS8L3	ENSG00000198758.10	4760	0.130	2350	1.15e-37
ERGIC3	ENSG00000125991.18	192324	94039	1024	3.36e-80
ERICH5	ENSG00000177459.10	18920	3410	2175	3.46e-19
ERRFI1	ENSG00000116285.12	67672	160379	-1233	2.84e-23
ESM1	ENSG00000164283.12	3220	0.090	1953	5.43e-63
ESR1	ENSG00000091831.21	0.530	4470	-1838	8.03e-40
ETFDH	ENSG00000171503.11	27810	58846	-1055	6.14e-35
ETV4	ENSG00000175832.12	3970	0.460	1767	1.04e-31
EVL	ENSG00000196405.12	25860	54749	-1054	1.73e-23
EXO1	ENSG00000174371.16	1810	0.100	1353	2.40e-52
EXOC3L4	ENSG00000205436.7	17590	43365	-1255	6.61e-21
EXOC4	ENSG00000131558.14	11340	5170	1000	5.68e-65
EXOSC4	ENSG00000178896.6	41630	15195	1396	1.06e-68
EXOSC5	ENSG00000077348.8	22461	8788	1261	1.59e-73
EZH2	ENSG00000106462.10	3650	1275	1031	2.70e-29
F11-AS1	ENSG00000251165.5	2750	8870	-1396	1.82e-42
F5	ENSG00000198734.10	206614	92446	1152	2.22e-18
F9	ENSG00000101981.10	42659	138457	-1675	9.92e-26
FABP4	ENSG00000170323.8	7470	2645	1216	1.14e-12
FABP5	ENSG00000164687.10	16660	2880	2186	4.29e-54
FABP5P7	ENSG00000234964.4	8220	1645	1801	3.70e-39
FAM103A1	ENSG00000169612.3	15700	7285	1011	1.71e-65
FAM103A2P	ENSG00000235272.1	6950	2265	1284	1.89e-38
FAM111B	ENSG00000189057.10	1570	0.090	1237	7.61e-38
FAM127B	ENSG00000203950.6	33109	15435	1053	4.94e-11
FAM134B	ENSG00000154153.13	2320	9124	-1609	1.14e-22
FAM13A	ENSG00000138640.14	3100	15240	-1986	4.48e-37
FAM150B	ENSG00000189292.15	0.130	1280	-1013	6.40e-13
FAM151A	ENSG00000162391.11	0.450	2274	-1175	1.30e-5
FAM160B2	ENSG00000158863.21	9280	22195	-1174	3.72e-16
FAM163B	ENSG00000196990.8	0.090	2415	-1648	6.86e-62
FAM180A	ENSG00000189320.8	0.220	3430	-1860	9.27e-68
FAM189B	ENSG00000160767.20	12530	4445	1313	2.21e-53
FAM193B	ENSG00000146067.15	17130	46951	-1403	3.96e-12
FAM195B	ENSG00000225663.7	68721	30140	1163	6.07e-48
FAM198A	ENSG00000144649.8	0.360	3950	-1864	3.46e-47
FAM20B	ENSG00000116199.11	8970	3605	1114	5.81e-64
FAM222A	ENSG00000139438.5	4250	1125	1305	9.91e-40
FAM229A	ENSG00000225828.1	1520	4930	-1235	4.48e-23
FAM3B	ENSG00000183844.16	2720	0.600	1217	2.02e-15
FAM49B	ENSG00000153310.18	17579	7295	1163	2.93e-35
FAM50A	ENSG00000071859.14	61922	25359	1255	2.68e-43
FAM65C	ENSG00000042062.11	0.330	7740	-2716	1.54e-99
FAM83A-AS1	ENSG00000204949.8	0.450	4950	-2037	6.17e-10
FAM83D	ENSG00000101447.13	4500	0.855	1568	1.93e-42
FAM83H	ENSG00000180921.6	14960	5055	1398	1.27e-49
FAM99A	ENSG00000205866.3	1100	37310	-4189	1.17e-67
FAM99B	ENSG00000205865.4	0.230	3835	-1975	1.18e-53
FANCC	ENSG00000158169.11	2860	7004	-1052	2.43e-30
FANCD2	ENSG00000144554.10	2680	0.595	1206	9.93e-38
FANCI	ENSG00000140525.17	3080	0.565	1382	2.24e-48
FASN	ENSG00000169710.6	217896	108112	1004	3.48e-8
FAT1	ENSG00000083857.13	33420	11800	1427	6.89e-25
FAU	ENSG00000149806.10	796206	363206	1130	1.05e-78
FBL	ENSG00000105202.7	123391	47738	1352	1.44e-58
FBLN1	ENSG00000077942.17	8620	3655	1047	1.01e-8
FBLN7	ENSG00000144152.12	6200	2045	1242	2.54e-37
FBP1	ENSG00000165140.9	116403	296902	-1343	5.91e-21
FBXO32	ENSG00000156804.7	4230	1220	1236	3.97e-34
FCGR2B	ENSG00000072694.18	1640	9100	-1936	2.99e-24
FCN2	ENSG00000160339.15	0.280	30658	-4628	1.03e-122
FCN3	ENSG00000142748.12	2320	67300	-4363	6.93e-80
FDPS	ENSG00000160752.14	291630	108698	1416	6.13e-42
FEN1	ENSG00000168496.3	12590	2900	1801	1.04e-69
FGB	ENSG00000171564.11	3258516	6850767	-1072	1.01e-10
FGL1	ENSG00000104760.16	714652	1526116	-1093	1.75e-9
FHIT	ENSG00000189283.9	11090	4220	1212	1.38e-50
FIBP	ENSG00000172500.12	36801	17760	1011	1.09e-63
FITM1	ENSG00000139914.6	1310	7180	-1824	8.48e-70
FKBP11	ENSG00000134285.10	70438	29725	1217	1.59e-26
FKBP1A	ENSG00000088832.14	88560	40050	1125	7.19e-58
FKBP9	ENSG00000122642.10	17640	8315	1001	3.33e-37
FKBPL	ENSG00000204315.3	5260	2025	1049	1.27e-72
FLAD1	ENSG00000160688.18	34291	12850	1349	6.24e-85
FLJ22763	ENSG00000241224.6	0.760	6250	-2042	2.76e-31
FLVCR1	ENSG00000162769.12	3430	0.705	1378	1.21e-60
FLVCR1-AS1	ENSG00000198468.7	2930	0.710	1201	1.22e-41
FLYWCH2	ENSG00000162076.12	14310	4850	1388	1.29e-46
FN3K	ENSG00000167363.13	54059	25804	1039	9.62e-33
FNBP4	ENSG00000109920.12	9220	20065	-1043	7.59e-11
FNDC4	ENSG00000115226.9	22841	53096	-1182	1.79e-22
FOLH1B	ENSG00000134612.11	0.430	4130	-1843	7.58e-29
FOLR2	ENSG00000165457.13	10760	4165	1187	6.91e-16
FOS	ENSG00000170345.9	15560	80208	-2294	8.69e-34
FOSB	ENSG00000125740.13	1620	4380	-1038	1.10e-7
FOXM1	ENSG00000111206.12	5720	0.910	1815	1.39e-43
FOXRED2	ENSG00000100350.14	6450	2045	1291	5.95e-43
FPR1	ENSG00000171051.8	0.530	2290	-1105	4.37e-22
FST	ENSG00000134363.11	51929	24758	1039	1.14e-5
FTH1	ENSG00000167996.15	3615300	1496627	1272	5.46e-57
FTH1P20	ENSG00000226564.1	13070	1480	2504	1.33e-111
FTH1P23	ENSG00000242960.1	2400	0.630	1061	8.19e-61
FTH1P7	ENSG00000232187.1	25500	2380	2971	1.09e-98
FTH1P8	ENSG00000219507.4	9880	1330	2223	2.38e-80
FTL	ENSG00000087086.13	11550758	5723571	1013	1.20e-25
FUCA2	ENSG00000001036.13	34951	16730	1020	5.91e-41
FXYD1	ENSG00000266964.5	79340	237140	-1568	7.20e-14
FXYD5	ENSG00000089327.14	29699	13652	1067	2.60e-20
G0S2	ENSG00000123689.5	46051	133107	-1511	7.16e-20
G6PD	ENSG00000160211.15	9900	2875	1492	1.63e-33
GABBR1	ENSG00000204681.10	0.680	2665	-1125	3.14e-20
GABRD	ENSG00000187730.7	1660	0.060	1327	4.46e-77
GADD45B	ENSG00000099860.8	66472	152783	-1189	7.04e-26
GARS	ENSG00000106105.13	59231	24455	1243	1.72e-51
GAS5	ENSG00000234741.7	169388	80573	1063	4.63e-28
GBA	ENSG00000177628.15	73480	12610	2452	1.33e-128
GBA3	ENSG00000249948.6	8220	31277	-1808	6.30e-19
GBP2	ENSG00000162645.12	45972	15320	1525	3.77e-36
GBP7	ENSG00000213512.1	6710	14798	-1035	1.37e-6
GCGR	ENSG00000215644.9	4470	57661	-3423	1.44e-49
GCH1	ENSG00000131979.18	11760	29190	-1242	1.40e-37
GCKR	ENSG00000084734.8	22119	98499	-2106	2.45e-50
GDF15	ENSG00000130513.6	44510	15795	1438	7.30e-18
GDF2	ENSG00000263761.2	0.000	4840	-2546	6.71e-134
GEMIN6	ENSG00000152147.10	11220	5080	1007	4.43e-69
GGCT	ENSG00000006625.17	31260	13475	1156	1.69e-71
GGH	ENSG00000137563.11	121852	51186	1235	2.02e-23
GGPS1	ENSG00000152904.11	12930	5865	1021	3.31e-64
GGT5	ENSG00000099998.17	8170	19870	-1186	5.35e-19
GGTA1P	ENSG00000204136.10	3880	1105	1213	1.73e-39
GHR	ENSG00000112964.13	7300	26178	-1711	6.69e-33
GINS1	ENSG00000101003.9	1720	0.200	1181	6.13e-43
GINS2	ENSG00000131153.8	2400	0.410	1270	7.31e-50
GJA1	ENSG00000152661.7	4230	1415	1115	1.14e-24
GJA5	ENSG00000265107.2	2240	0.385	1226	1.94e-40
GLA	ENSG00000102393.9	19061	7165	1297	1.96e-35
GLB1	ENSG00000170266.15	33079	15252	1068	2.20e-54
GLMP	ENSG00000198715.11	123023	36071	1742	7.71e-84
GLS2	ENSG00000135423.12	7550	64115	-2929	1.02e-29
GLUL	ENSG00000135821.16	323024	144037	1160	8.32e-18
GLYAT	ENSG00000149124.10	35370	138764	-1942	6.47e-17
GLYATL1	ENSG00000166840.13	44609	140035	-1629	2.48e-25
GM2A	ENSG00000196743.8	16000	4965	1511	1.91e-85
GMNN	ENSG00000112312.9	31111	6190	2159	3.97e-73
GMPS	ENSG00000163655.15	19410	6880	1373	4.56e-65
GNAO1	ENSG00000087258.13	0.680	7760	-2382	3.81e-62
GNAZ	ENSG00000128266.8	2380	0.150	1555	1.51e-41
GNB2L1	ENSG00000204628.11	891937	427994	1058	8.48e-58
GNMT	ENSG00000124713.5	30380	90336	-1541	8.25e-11
GNPAT	ENSG00000116906.11	27720	11880	1157	5.71e-61
GNS	ENSG00000135677.10	30759	13590	1122	9.18e-55
GOLGA6L5P	ENSG00000230373.8	0.930	3465	-1210	7.25e-28
GOLGA8B	ENSG00000215252.11	7700	19393	-1229	5.96e-7
GOLGA8N	ENSG00000232653.8	1070	3665	-1172	1.38e-29
GOLM1	ENSG00000135052.16	22400	5695	1805	5.87e-22
GOLPH3L	ENSG00000143457.10	9310	3605	1163	8.49e-47
GPAA1	ENSG00000197858.10	115511	39639	1520	3.11e-78
GPANK1	ENSG00000204438.10	16020	6145	1252	5.39e-73
GPATCH4	ENSG00000160818.16	18181	7330	1203	5.38e-43
GPC3	ENSG00000147257.13	148158	0.920	6280	1.03e-75
GPD1	ENSG00000167588.12	15390	46359	-1531	1.79e-15
GPKOW	ENSG00000068394.10	14820	6730	1033	1.17e-69
GPM6A	ENSG00000150625.16	0.160	1640	-1186	1.22e-50
GPNMB	ENSG00000136235.15	12740	3525	1602	5.26e-25
GPSM1	ENSG00000160360.11	3670	1165	1109	6.01e-18
GRAMD1A	ENSG00000089351.14	18690	8595	1037	3.07e-13
GRAMD1C	ENSG00000178075.19	2240	5925	-1096	2.13e-24
GREM2	ENSG00000180875.4	0.930	6410	-1941	9.82e-26
GRK6	ENSG00000198055.10	10620	4710	1025	2.76e-52
GRN	ENSG00000030582.16	187857	59719	1637	3.65e-90
GSDMB	ENSG00000073605.18	9100	23562	-1282	2.98e-13
GSN	ENSG00000148180.16	85882	37655	1168	7.02e-20
GSTA4	ENSG00000170899.10	18010	6855	1275	3.56e-37
GSTM1	ENSG00000134184.12	1280	70601	-4973	2.71e-4
GSTM2	ENSG00000213366.12	4740	20760	-1923	2.33e-32
GSTT2B	ENSG00000133433.10	3380	10820	-1432	1.65e-9
GSTZ1	ENSG00000100577.18	29670	81055	-1420	1.36e-26
GTF2A2	ENSG00000140307.10	61158	26395	1182	2.64e-79
GTF2IP4	ENSG00000233369.7	23860	8225	1430	3.76e-40
GTF2IRD1	ENSG00000006704.10	7070	2745	1108	2.10e-39
GYS2	ENSG00000111713.2	7640	28294	-1761	5.53e-27
H19	ENSG00000130600.15	98988	321895	-1691	6.52e-3
H1F0	ENSG00000189060.5	142438	60620	1219	3.38e-36
H2AFJ	ENSG00000246705.4	110208	42105	1367	1.38e-58
H2AFV	ENSG00000105968.18	78302	31871	1271	2.77e-84
H2AFX	ENSG00000188486.3	14940	4970	1417	1.76e-41
H2AFY	ENSG00000113648.16	56539	24299	1185	6.43e-53
H2AFZ	ENSG00000164032.11	99808	32785	1577	1.80e-62
H2BFS	ENSG00000234289.5	7350	2365	1311	1.66e-37
H3F3A	ENSG00000163041.9	397496	139034	1509	2.40e-92
H3F3AP4	ENSG00000235655.3	144256	34374	2038	2.82e-25
HACD3	ENSG00000074696.12	47261	19230	1254	2.85e-46
HAL	ENSG00000084110.10	20480	54784	-1377	5.36e-21
HAMP	ENSG00000105697.7	6750	669968	-6436	1.71e-79
HAND2	ENSG00000164107.8	0.400	5020	-2104	1.55e-60
HAND2-AS1	ENSG00000237125.8	0.120	2285	-1552	4.66e-77
HAO2	ENSG00000116882.14	11130	111712	-3216	3.75e-38
HAPLN4	ENSG00000187664.8	0.310	1810	-1101	2.34e-36
HAUS1	ENSG00000152240.12	8630	3675	1043	1.47e-44
HAUS4	ENSG00000092036.16	21440	9115	1150	1.25e-32
HAX1	ENSG00000143575.14	107328	46864	1178	2.92e-81
HBA1	ENSG00000206172.8	10000	98975	-3184	3.03e-66
HBA2	ENSG00000188536.12	22150	162612	-2821	1.03e-55
HBB	ENSG00000244734.3	15860	167277	-3319	7.46e-69
HCFC1R1	ENSG00000103145.10	44622	21699	1007	1.36e-46
HCST	ENSG00000126264.9	12420	5039	1152	4.65e-23
HDAC11	ENSG00000163517.14	8490	2100	1614	5.27e-67
HDGFRP2	ENSG00000167674.14	27739	12485	1092	1.56e-74
HELLS	ENSG00000119969.14	1830	0.405	1010	7.73e-32
HEPN1	ENSG00000221932.6	0.210	5295	-2379	7.16e-8
HERC2P2	ENSG00000276550.4	4350	13429	-1431	4.25e-11
HEXA	ENSG00000213614.9	76680	33930	1153	4.79e-56
HEXB	ENSG00000049860.13	156096	62003	1318	5.34e-80
HGF	ENSG00000019991.15	0.790	6615	-2089	2.41e-45
HGFAC	ENSG00000109758.8	11260	117783	-3276	7.30e-46
HGH1	ENSG00000235173.6	22409	10215	1062	3.85e-45
HHIP	ENSG00000164161.9	0.060	1475	-1223	1.57e-52
HIGD1B	ENSG00000131097.6	2200	0.190	1427	4.31e-80
HIGD2A	ENSG00000146066.2	145804	67002	1110	3.36e-80
HIST1H1C	ENSG00000187837.3	128818	48314	1396	2.24e-29
HIST1H2BK	ENSG00000197903.7	106042	36820	1501	1.48e-31
HIST2H2AA4	ENSG00000272196.2	29590	9480	1545	1.76e-14
HIST2H4A	ENSG00000270882.2	8540	3165	1196	6.61e-26
HJURP	ENSG00000123485.11	2220	0.245	1371	8.29e-44
HK3	ENSG00000160883.10	1210	4105	-1208	9.15e-27
HKDC1	ENSG00000156510.12	8110	1010	2180	4.64e-28
HLA-A	ENSG00000206503.11	714504	165214	2106	3.97e-63
HLA-B	ENSG00000234745.9	788298	281004	1485	5.16e-23
HLA-C	ENSG00000204525.14	499658	223828	1155	3.10e-23
HLA-DMA	ENSG00000204257.14	37320	12255	1532	5.41e-31
HLA-DMB	ENSG00000242574.8	14220	4740	1407	6.29e-26
HLA-DPA1	ENSG00000231389.7	49969	17045	1498	2.23e-18
HLA-DPB1	ENSG00000223865.10	59821	17400	1725	1.78e-23
HLA-DQA1	ENSG00000196735.11	12490	3505	1582	2.63e-17
HLA-DQA2	ENSG00000237541.3	2190	0.425	1163	1.27e-12
HLA-DQB1	ENSG00000179344.16	22920	5189	1950	2.28e-22
HLA-DRA	ENSG00000204287.13	171468	42669	1982	8.26e-28
HLA-DRB1	ENSG00000196126.10	66431	27555	1240	1.56e-17
HLA-DRB5	ENSG00000198502.5	14200	5880	1144	1.73e-10
HLA-DRB6	ENSG00000229391.7	4280	0.965	1426	1.54e-22
HLA-F	ENSG00000204642.13	95709	30939	1598	5.56e-28
HLA-H	ENSG00000206341.7	36931	6175	2402	3.88e-50
HM13	ENSG00000101294.16	160162	70709	1168	2.03e-50
HMGA1	ENSG00000137309.19	36319	6900	2240	1.21e-60
HMGB2	ENSG00000164104.11	34871	11520	1519	6.59e-49
HMGN1	ENSG00000205581.10	69420	32281	1081	1.62e-41
HMGN1P37	ENSG00000229237.2	1590	0.000	1373	4.75e-51
HMGN2	ENSG00000198830.10	225736	103877	1112	1.39e-53
HMGN2P5	ENSG00000234664.1	42659	13404	1600	1.24e-49
HMGN4	ENSG00000182952.4	13390	5360	1178	1.37e-25
HMMR	ENSG00000072571.19	2540	0.200	1561	3.19e-49
HN1	ENSG00000189159.15	64208	19065	1700	1.31e-64
HNRNPA1	ENSG00000135486.17	363698	146569	1305	1.94e-53
HNRNPA1P48	ENSG00000224578.4	7860	3015	1142	2.15e-42
HNRNPA3	ENSG00000170144.18	124077	57412	1098	9.00e-58
HNRNPCP2	ENSG00000204253.4	7960	0.895	2241	1.65e-87
HOGA1	ENSG00000241935.8	7790	21020	-1325	7.78e-25
HOMER3	ENSG00000051128.18	7300	2490	1250	6.20e-30
HOOK2	ENSG00000095066.11	8220	22890	-1374	1.93e-13
HP	ENSG00000257017.8	8497954	26421961	-1636	6.17e-21
HPGD	ENSG00000164120.13	14550	40456	-1415	1.35e-14
HPN-AS1	ENSG00000227392.1	0.590	3690	-1561	4.08e-41
HPX	ENSG00000110169.10	1194589	2403131	-1008	6.90e-12
HRAS	ENSG00000174775.16	32271	15190	1039	6.53e-48
HRCT1	ENSG00000196196.2	4340	0.480	1851	7.00e-44
HSD11B1	ENSG00000117594.9	76531	189827	-1299	9.29e-11
HSD17B13	ENSG00000170509.11	6730	74827	-3294	5.86e-17
HSP90AB1	ENSG00000096384.19	400622	139516	1515	1.22e-55
HSPA4	ENSG00000170606.13	68029	27190	1292	1.66e-60
HSPB1	ENSG00000106211.8	644572	168996	1925	1.23e-47
HSPB11	ENSG00000081870.11	21910	10425	1004	7.92e-60
HSPB1P1	ENSG00000236060.2	5310	0.000	2658	1.36e-59
HSPG2	ENSG00000142798.16	22611	8685	1286	4.63e-31
HTATIP2	ENSG00000109854.13	77831	32464	1236	2.73e-36
HTATSF1	ENSG00000102241.11	19280	8460	1100	4.40e-50
HULC	ENSG00000276019.1	127221	34625	1848	7.30e-15
HULC	ENSG00000251164.1	307319	57466	2399	2.14e-28
ICAM2	ENSG00000108622.10	12490	5214	1118	3.43e-36
ID1	ENSG00000125968.8	15630	47120	-1533	4.82e-26
IDO2	ENSG00000188676.13	0.110	2540	-1673	4.92e-45
IFI27	ENSG00000165949.12	145209	26640	2403	3.29e-26
IFI27L1	ENSG00000165948.10	14550	4515	1495	1.40e-74
IFI27L2	ENSG00000119632.3	12910	4625	1306	9.36e-26
IFI30	ENSG00000216490.3	140769	51639	1429	1.76e-39
IFI35	ENSG00000068079.7	35901	15200	1188	1.78e-39
IFI6	ENSG00000126709.14	95742	36279	1376	1.17e-15
IFITM10	ENSG00000244242.1	1820	8635	-1773	5.58e-24
IFT52	ENSG00000101052.12	7390	3060	1047	4.62e-48
IGBP1	ENSG00000089289.15	20490	8450	1185	7.22e-62
IGF1	ENSG00000017427.15	4770	12475	-1224	1.95e-18
IGF2	ENSG00000167244.17	10290	89750	-3007	2.89e-8
IGF2BP2	ENSG00000073792.15	2680	0.680	1131	1.17e-17
IGFALS	ENSG00000099769.5	2830	40840	-3449	6.33e-52
IGFBP3	ENSG00000146674.14	49428	164471	-1714	1.63e-31
IGHA1	ENSG00000211895.4	21080	103500	-2243	2.41e-18
IGHA2	ENSG00000211890.3	2830	10167	-1544	3.93e-13
IGHG2	ENSG00000211893.3	10090	28674	-1420	1.85e-4
IGHG4	ENSG00000211892.3	4900	13650	-1312	7.64e-4
IGHM	ENSG00000211899.7	8760	27634	-1553	3.41e-11
IGHV2-5	ENSG00000211937.3	0.230	1725	-1148	2.75e-3
IGKC	ENSG00000211592.6	145713	295005	-1013	8.32e-4
IGKV1-27	ENSG00000244575.3	0.400	1940	-1070	9.41e-3
IGKV1-33	ENSG00000242076.2	1170	5510	-1585	9.57e-4
IGKV1-9	ENSG00000241755.1	0.570	2357	-1097	2.05e-3
IGKV2-24	ENSG00000241294.1	0.370	2074	-1166	2.43e-7
IGKV2-28	ENSG00000244116.3	2520	8890	-1490	4.79e-4
IGKV3-11	ENSG00000241351.2	8890	19145	-1026	2.74e-3
IGKV3-20	ENSG00000239951.1	6350	17302	-1316	2.59e-3
IGLC2	ENSG00000211677.2	39769	93769	-1217	2.20e-3
IGLC3	ENSG00000211679.2	24690	52180	-1050	9.12e-4
IGLV1-40	ENSG00000211653.2	1330	6649	-1715	1.18e-3
IGLV1-51	ENSG00000211644.2	1470	5900	-1482	5.63e-4
IGLV2-11	ENSG00000211668.2	1120	4605	-1403	1.08e-3
IGLV2-14	ENSG00000211666.2	2140	11483	-1991	6.25e-7
IGLV2-8	ENSG00000278196.1	0.550	2785	-1288	8.03e-6
IGLV3-25	ENSG00000211659.2	0.840	3975	-1435	7.49e-3
IGSF8	ENSG00000162729.13	46529	21859	1056	6.29e-34
IGSF9	ENSG00000085552.16	1640	7910	-1755	9.79e-25
IK	ENSG00000113141.15	56141	25390	1115	7.86e-80
IL1RAP	ENSG00000196083.9	6410	25615	-1845	2.58e-47
IL1RL1	ENSG00000115602.16	0.080	1330	-1109	1.58e-47
IL32	ENSG00000008517.16	748417	295250	1339	4.99e-25
IL3RA	ENSG00000185291.10	2950	0.600	1304	6.81e-70
IL4R	ENSG00000077238.13	17090	36155	-1038	4.91e-26
ILF2	ENSG00000143621.16	80991	27020	1549	3.36e-80
IMMP2L	ENSG00000184903.9	17520	8165	1015	3.74e-45
IMPDH2	ENSG00000178035.11	67662	29130	1188	6.27e-44
INHBB	ENSG00000163083.5	10180	4304	1076	1.91e-13
INMT	ENSG00000241644.2	1570	7730	-1764	2.10e-41
INS-IGF2	ENSG00000129965.13	0.000	4030	-2331	3.96e-66
IP6K3	ENSG00000161896.10	0.360	2394	-1319	5.02e-11
IQGAP3	ENSG00000183856.10	2350	0.120	1581	1.18e-51
IRAK1	ENSG00000184216.11	36750	13790	1352	3.34e-42
IRF6	ENSG00000117595.10	21240	9510	1081	6.81e-12
ISG15	ENSG00000187608.8	71550	30819	1189	1.10e-15
ISG20	ENSG00000172183.14	19960	9170	1043	1.43e-14
ITGA6	ENSG00000091409.14	10250	2740	1589	8.05e-53
ITGB1BP1	ENSG00000119185.12	32839	12855	1288	6.40e-60
ITGB3BP	ENSG00000142856.16	8560	3155	1202	1.98e-55
ITGB4	ENSG00000132470.13	5130	1670	1199	5.57e-30
ITIH2	ENSG00000151655.17	623739	212342	1550	7.89e-18
ITIH4-AS1	ENSG00000239799.1	0.580	3970	-1653	1.43e-49
ITPKA	ENSG00000137825.10	3460	0.555	1520	1.66e-33
JCHAIN	ENSG00000132465.10	2830	8089	-1247	8.47e-7
JMJD4	ENSG00000081692.12	14750	6215	1126	2.58e-67
KAZN	ENSG00000189337.15	0.340	1910	-1119	2.23e-42
KBTBD11	ENSG00000176595.3	0.260	2645	-1532	3.21e-66
KCND3	ENSG00000171385.9	0.840	3235	-1203	4.15e-29
KCNK5	ENSG00000164626.8	1670	4375	-1009	3.97e-17
KCNN2	ENSG00000080709.14	0.250	4350	-2098	8.85e-65
KCTD17	ENSG00000100379.17	4510	1625	1070	3.88e-19
KDELR3	ENSG00000100196.10	9840	3980	1122	1.98e-18
KDM8	ENSG00000155666.11	5660	45724	-2811	6.73e-51
KIAA0101	ENSG00000166803.10	9860	1510	2113	3.41e-56
KIAA0196	ENSG00000164961.15	15470	6095	1215	9.03e-64
KIAA0895L	ENSG00000196123.12	2040	7160	-1424	8.66e-21
KIAA1429	ENSG00000164944.11	32019	13155	1222	1.01e-76
KIAA1462	ENSG00000165757.8	3310	0.520	1504	6.46e-66
KIAA1522	ENSG00000162522.10	11990	3850	1421	1.21e-44
KIF20A	ENSG00000112984.11	2790	0.130	1746	4.94e-52
KIF23	ENSG00000137807.13	1480	0.190	1059	1.63e-35
KIF2C	ENSG00000142945.12	2210	0.170	1456	6.32e-48
KIF4A	ENSG00000090889.11	1870	0.070	1423	1.58e-50
KIFAP3	ENSG00000075945.12	9630	3710	1174	2.90e-51
KIFC1	ENSG00000237649.7	4370	0.205	2156	2.38e-64
KLHDC3	ENSG00000124702.17	61120	29215	1040	8.17e-68
KMO	ENSG00000117009.11	7170	20115	-1370	6.80e-29
KNSTRN	ENSG00000128944.13	7780	2795	1210	1.06e-45
KPNA2	ENSG00000182481.8	28430	6310	2009	1.26e-73
KRT13	ENSG00000171401.14	0.000	2740	-1903	4.33e-55
KRT17P4	ENSG00000205312.8	0.050	1340	-1156	2.10e-54
KRT23	ENSG00000108244.16	2850	0.210	1670	2.26e-16
KRTCAP2	ENSG00000163463.11	342651	102454	1732	1.70e-112
KRTCAP3	ENSG00000157992.12	1410	6480	-1634	1.53e-6
LAGE3	ENSG00000196976.6	36590	11005	1647	5.92e-76
LAMA3	ENSG00000053747.15	3810	0.880	1355	6.64e-31
LAMA4	ENSG00000112769.18	4830	1380	1293	6.98e-44
LAMC1	ENSG00000135862.5	26829	5775	2038	1.93e-58
LAMP2	ENSG00000005893.15	125756	60959	1033	9.44e-33
LAMTOR2	ENSG00000116586.11	162263	71280	1176	3.44e-79
LAMTOR4	ENSG00000188186.10	128079	55479	1192	3.76e-71
LAPTM4B	ENSG00000104341.16	34179	7560	2039	4.23e-40
LAPTM5	ENSG00000162511.7	28489	13690	1005	9.80e-18
LASP1	ENSG00000002834.17	64408	28585	1145	2.03e-47
LCAT	ENSG00000213398.7	32421	153649	-2210	5.15e-49
LCMT1	ENSG00000205629.11	12620	5335	1104	1.14e-62
LCN12	ENSG00000184925.11	6830	17900	-1271	9.28e-23
LCN2	ENSG00000148346.11	38101	5525	2583	2.57e-15
LEF1	ENSG00000138795.9	2670	0.290	1508	4.10e-38
LENG8	ENSG00000167615.16	19070	47910	-1285	3.73e-14
LGALS3	ENSG00000131981.15	30231	6845	1993	2.45e-31
LGALS3BP	ENSG00000108679.12	160385	54264	1546	3.24e-11
LGALS4	ENSG00000171747.8	224270	46120	2257	7.35e-9
LGALS9	ENSG00000168961.16	20790	8120	1257	2.67e-25
LHX2	ENSG00000106689.10	0.360	2330	-1292	1.89e-46
LIFR	ENSG00000113594.9	0.710	3515	-1401	5.90e-55
LIG1	ENSG00000105486.13	16180	6240	1247	2.05e-45
LILRB5	ENSG00000105609.16	1450	4175	-1079	1.27e-32
LINC00106	ENSG00000236871.6	0.560	2260	-1063	4.50e-22
LINC00152	ENSG00000222041.10	35260	4540	2711	9.17e-69
LINC00174	ENSG00000179406.6	1050	3635	-1177	4.88e-30
LINC00238	ENSG00000196553.13	0.190	3295	-1852	7.73e-39
LINC00467	ENSG00000153363.12	10370	4585	1026	1.23e-53
LINC00511	ENSG00000227036.6	1860	0.105	1372	3.50e-30
LINC00659	ENSG00000228705.1	1390	4703	-1255	9.25e-24
LINC00665	ENSG00000232677.6	2160	0.485	1089	1.21e-22
LINC00844	ENSG00000237949.1	5590	37984	-2565	6.05e-18
LINC00969	ENSG00000242086.8	15970	33294	-1015	8.15e-9
LINC01002	ENSG00000282508.1	3890	14567	-1671	8.14e-21
LINC01018	ENSG00000250056.5	5580	19171	-1616	3.31e-12
LINC01093	ENSG00000249173.5	0.550	23300	-3971	1.11e-100
LINC01296	ENSG00000244306.9	2280	0.150	1512	7.31e-43
LINC01320	ENSG00000228262.8	0.460	2050	-1063	3.55e-12
LINC01348	ENSG00000280587.1	1200	8645	-2132	1.69e-55
LINC01370	ENSG00000237767.1	0.530	6555	-2304	7.55e-16
LINC01554	ENSG00000236882.7	1420	69249	-4859	3.59e-35
LINC01595	ENSG00000259108.2	0.990	6505	-1915	3.70e-21
LINC01604	ENSG00000253716.5	8220	3345	1085	1.70e-38
LIPG	ENSG00000101670.11	8010	21904	-1346	8.48e-25
LL22NC03-N14H11.1	ENSG00000272872.1	1960	0.290	1198	7.89e-32
LMAN2	ENSG00000169223.14	226866	97544	1209	6.41e-83
LMCD1	ENSG00000071282.11	10450	3680	1291	3.96e-28
LMNA	ENSG00000160789.19	175520	45859	1913	8.99e-107
LMNB1	ENSG00000113368.11	7730	2210	1443	1.55e-33
LOXL2	ENSG00000134013.15	3680	1030	1205	5.02e-27
LOXL4	ENSG00000138131.3	3580	0.720	1413	6.21e-11
LPA	ENSG00000198670.11	1210	8365	-2083	1.57e-49
LPAL2	ENSG00000213071.10	1310	6390	-1678	7.56e-55
LPIN3	ENSG00000132793.11	4750	13924	-1376	1.63e-17
LRCOL1	ENSG00000204583.9	1040	7855	-2118	9.00e-36
LRG1	ENSG00000171236.9	121229	339166	-1477	2.33e-19
LRP11	ENSG00000120256.9	7820	3315	1032	4.44e-39
LRP5L	ENSG00000100068.11	2810	7535	-1164	2.26e-21
LRPAP1	ENSG00000163956.10	95259	43646	1108	8.86e-52
LRRC1	ENSG00000137269.14	2350	0.340	1322	5.08e-35
LSM2	ENSG00000204392.10	38869	13895	1420	1.16e-76
LSM4	ENSG00000130520.10	102757	45219	1167	1.21e-68
LSM7	ENSG00000130332.14	71848	34910	1021	3.11e-54
LSM8	ENSG00000128534.7	21201	8135	1281	1.28e-68
LSMEM1	ENSG00000181016.9	0.640	3055	-1306	2.06e-37
LTB	ENSG00000227507.2	7990	2180	1499	4.79e-21
LTB4R	ENSG00000213903.8	2010	5365	-1080	1.44e-17
LY6E	ENSG00000160932.10	54530	259294	-2229	1.05e-32
LY6G5B	ENSG00000240053.8	1490	4070	-1026	3.16e-11
LY96	ENSG00000154589.6	8450	3375	1111	5.32e-19
LYPD1	ENSG00000150551.10	2340	0.225	1447	3.91e-29
LYPLAL1	ENSG00000143353.11	36221	14405	1273	2.06e-61
LYRM4	ENSG00000214113.10	16000	6435	1193	6.46e-66
LYVE1	ENSG00000133800.8	0.830	7055	-2138	3.68e-48
LYZ	ENSG00000090382.6	81413	9505	2972	2.48e-36
MAD2L1	ENSG00000164109.13	3900	0.535	1675	1.56e-55
MAF1	ENSG00000179632.9	56469	23510	1229	1.60e-67
MAGED1	ENSG00000179222.17	64440	31600	1005	6.70e-19
MAGED2	ENSG00000102316.16	63711	22045	1490	2.48e-74
MAGI2-AS3	ENSG00000234456.7	1530	8760	-1948	4.63e-32
MAGOHB	ENSG00000111196.9	17950	7980	1077	1.70e-69
MALAT1	ENSG00000251562.7	13790	31885	-1153	5.69e-10
MAMDC4	ENSG00000177943.13	2660	11405	-1761	1.17e-22
MAN1C1	ENSG00000117643.14	4640	13085	-1320	4.96e-26
MAN2B1	ENSG00000104774.12	55591	17704	1597	2.17e-79
MANBAL	ENSG00000101363.12	32901	15210	1064	5.29e-74
MANEAL	ENSG00000185090.14	9160	3035	1332	5.01e-41
MAP1S	ENSG00000130479.10	14040	5995	1104	1.01e-49
MAP2	ENSG00000078018.19	3050	0.965	1043	1.07e-19
MAPK3	ENSG00000102882.11	24540	9990	1217	2.51e-66
MAPK8IP3	ENSG00000138834.12	5620	18720	-1575	1.09e-15
MAPRE1	ENSG00000101367.8	14980	6110	1168	1.94e-36
MARCKS	ENSG00000277443.1	15050	5100	1396	2.19e-36
MARCKSL1	ENSG00000175130.6	29070	13709	1032	3.05e-23
MARCO	ENSG00000019169.10	0.390	19300	-3868	1.29e-65
MAT1A	ENSG00000151224.12	220907	484649	-1130	9.27e-22
MAZ	ENSG00000103495.13	114332	43406	1377	1.33e-80
MBL1P	ENSG00000242600.6	0.220	3060	-1735	1.30e-66
MBL2	ENSG00000165471.6	12810	37715	-1487	8.80e-20
MCAM	ENSG00000076706.14	14760	3970	1665	1.33e-42
MCC	ENSG00000171444.17	1220	3825	-1120	2.81e-45
MCM2	ENSG00000073111.13	6750	0.735	2159	2.77e-58
MCM3	ENSG00000112118.17	20530	5435	1742	1.27e-52
MCM4	ENSG00000104738.16	11240	2725	1716	3.86e-45
MCM5	ENSG00000100297.15	21450	4025	2160	8.12e-70
MCM6	ENSG00000076003.4	7880	1485	1837	5.46e-59
MCM7	ENSG00000166508.17	32919	12145	1368	6.41e-43
MDK	ENSG00000110492.15	132339	3805	4794	5.26e-103
MEA1	ENSG00000124733.3	62691	22585	1433	2.97e-101
MEG3	ENSG00000214548.14	2210	22203	-2854	3.16e-25
MELK	ENSG00000165304.7	2230	0.100	1554	3.73e-51
MESP1	ENSG00000166823.5	3860	0.960	1310	8.38e-53
Metazoa_SRP	ENSG00000274012.1	343769	129247	1404	9.73e-25
METTL13	ENSG00000010165.19	18000	7735	1121	9.51e-71
METTL5	ENSG00000138382.13	34820	15849	1088	3.81e-72
MFAP3L	ENSG00000198948.11	1980	7005	-1426	2.94e-28
MFAP4	ENSG00000166482.11	3460	14005	-1750	4.49e-21
MFSD2A	ENSG00000168389.17	3810	77691	-4032	1.53e-56
MFSD5	ENSG00000182544.8	14310	5980	1133	8.46e-73
MGP	ENSG00000111341.9	34700	15225	1138	1.81e-7
MIF4GD	ENSG00000125457.13	16580	7170	1106	1.05e-50
MIR4435-2HG	ENSG00000172965.14	33100	4450	2645	1.06e-59
MIS18A	ENSG00000159055.3	4360	1595	1047	1.03e-46
MKI67	ENSG00000148773.12	2900	0.170	1737	1.09e-51
MKKS	ENSG00000125863.17	22899	10375	1071	8.45e-46
MLXIPL	ENSG00000009950.15	98700	263982	-1410	2.03e-17
MME	ENSG00000196549.10	0.910	7135	-2091	6.34e-7
MMP11	ENSG00000099953.9	5240	0.350	2209	4.07e-50
MMP14	ENSG00000157227.12	15000	5000	1415	1.67e-27
MMP9	ENSG00000100985.7	3010	0.800	1156	2.10e-19
MND1	ENSG00000121211.7	2580	0.170	1613	6.90e-73
MOGAT2	ENSG00000166391.14	5550	49036	-2933	1.21e-46
MORN2	ENSG00000188010.12	12460	5615	1025	3.54e-52
MPC2	ENSG00000143158.10	279053	110929	1323	3.79e-78
MPPED1	ENSG00000186732.13	1340	5769	-1532	3.23e-36
MPZL1	ENSG00000197965.11	21410	8445	1247	1.07e-38
MRC1	ENSG00000260314.2	1920	5135	-1071	9.52e-9
MRPL13	ENSG00000172172.7	47431	19640	1230	1.34e-71
MRPL14	ENSG00000180992.6	79710	35330	1152	2.92e-76
MRPL15	ENSG00000137547.8	50699	24155	1039	4.54e-54
MRPL17	ENSG00000158042.8	33910	14065	1212	4.04e-76
MRPL21	ENSG00000197345.12	61230	29245	1041	7.62e-57
MRPL24	ENSG00000143314.12	161735	54922	1541	6.76e-93
MRPL47	ENSG00000136522.13	30300	14075	1054	2.66e-62
MRPL55	ENSG00000162910.18	113739	49114	1195	7.73e-67
MRPL9	ENSG00000143436.10	49261	19215	1314	1.24e-75
MRPS16	ENSG00000182180.13	81452	35440	1178	3.63e-86
MRPS17	ENSG00000239789.5	16480	7290	1076	3.79e-55
MRPS21	ENSG00000266472.5	63999	22470	1470	1.50e-90
MRPS23	ENSG00000181610.12	28859	9985	1443	4.22e-61
MSH2	ENSG00000095002.12	5180	1415	1356	3.50e-57
MST1	ENSG00000173531.15	205486	472132	-1196	2.22e-34
MST1L	ENSG00000186715.10	10360	64444	-2526	7.32e-33
MST1P2	ENSG00000186301.8	9950	74230	-2780	1.28e-44
MT-ATP6	ENSG00000198899.2	11214673	31942729	-1510	8.32e-59
MT-ATP8	ENSG00000228253.1	11020483	37358527	-1761	1.34e-41
MT-CO2	ENSG00000198712.1	13276616	27014567	-1025	2.51e-37
MT-CYB	ENSG00000198727.2	6751535	15334037	-1183	2.82e-41
MT-ND1	ENSG00000198888.2	5574782	11534356	-1049	2.05e-35
MT-ND2	ENSG00000198763.3	6531958	14680362	-1168	4.92e-35
MT-ND3	ENSG00000198840.2	9254247	19245719	-1056	1.66e-33
MT-ND4	ENSG00000198886.2	9684084	23104719	-1254	1.08e-49
MT-ND4L	ENSG00000212907.2	5341391	15483027	-1535	1.41e-36
MT-ND5	ENSG00000198786.2	1410997	3065910	-1119	5.51e-21
MT1A	ENSG00000205362.10	15190	81693	-2353	6.59e-26
MT1DP	ENSG00000205361.8	0.590	4235	-1719	3.25e-26
MT1E	ENSG00000169715.14	86228	797532	-3194	1.23e-38
MT1F	ENSG00000198417.6	7000	191386	-4588	5.84e-63
MT1G	ENSG00000125144.13	40209	2587601	-5973	1.58e-63
MT1H	ENSG00000205358.3	2160	332670	-6722	1.77e-79
MT1JP	ENSG00000255986.6	0.050	4620	-2420	9.48e-67
MT1L	ENSG00000260549.1	5340	45263	-2867	2.09e-44
MT1M	ENSG00000205364.3	1780	112018	-5345	7.43e-76
MT1P3	ENSG00000229230.3	0.000	1410	-1269	5.22e-13
MT1X	ENSG00000187193.8	145290	1597997	-3450	8.20e-51
MT1XP1	ENSG00000233929.1	0.000	2030	-1599	3.13e-43
MT2A	ENSG00000125148.6	261977	2324572	-3145	3.67e-52
MT2P1	ENSG00000162840.4	0.000	7110	-3020	1.68e-87
MTATP6P1	ENSG00000248527.1	1387526	3715008	-1420	3.14e-34
MTHFD1L	ENSG00000120254.15	4120	1275	1170	2.14e-28
MTHFD2L	ENSG00000163738.18	3570	9690	-1226	1.14e-47
MTND2P28	ENSG00000225630.1	211541	441922	-1059	4.17e-18
MTND4P12	ENSG00000247627.2	39650	0.810	4489	5.89e-26
MTND4P20	ENSG00000233377.1	4000	25358	-2398	6.60e-35
MTX1	ENSG00000173171.14	58838	20895	1450	9.01e-103
MUC13	ENSG00000173702.7	5820	0.220	2483	3.29e-25
MUC3A	ENSG00000169894.17	1620	5130	-1226	3.98e-9
MUC6	ENSG00000184956.15	0.020	1580	-1339	4.74e-13
MYBL2	ENSG00000101057.15	4070	0.190	2091	1.48e-48
MYEOV2	ENSG00000172428.10	94693	41148	1183	4.50e-69
MYL12B	ENSG00000118680.12	310295	142938	1113	2.14e-54
MYL6	ENSG00000092841.18	1006338	476208	1078	4.82e-67
MYL6B	ENSG00000196465.10	27219	9079	1485	2.11e-67
MYO7A	ENSG00000137474.19	4790	10680	-1012	2.73e-22
MYOM2	ENSG00000036448.9	0.860	4635	-1599	2.46e-48
MZF1	ENSG00000099326.8	4090	11175	-1258	8.23e-21
N4BP2L1	ENSG00000139597.16	12220	28050	-1136	2.70e-43
NAA20	ENSG00000173418.11	71858	29014	1279	1.16e-73
NABP2	ENSG00000139579.12	19380	7770	1217	3.32e-69
NACA	ENSG00000196531.10	953903	425790	1162	1.40e-78
NAMPT	ENSG00000105835.11	38001	86288	-1162	8.32e-20
NAP1L1	ENSG00000187109.13	87462	40215	1102	1.21e-38
NAT2	ENSG00000156006.4	2280	27324	-3110	4.01e-68
NBPF8	ENSG00000270231.3	2650	12719	-1910	8.74e-45
NCAPG	ENSG00000109805.9	2590	0.115	1687	2.30e-53
NCAPG2	ENSG00000146918.19	2930	0.895	1052	5.22e-35
NCAPH	ENSG00000121152.9	2550	0.170	1601	8.07e-54
NCAPH2	ENSG00000025770.18	23710	10600	1091	8.81e-53
NCSTN	ENSG00000162736.15	62552	26736	1196	6.43e-44
NDC80	ENSG00000080986.12	2910	0.180	1728	2.34e-60
NDRG2	ENSG00000165795.20	83239	176349	-1074	3.07e-26
NDRG3	ENSG00000101079.20	7090	2730	1117	1.86e-52
NDUFA1	ENSG00000125356.6	183101	75371	1269	3.09e-88
NDUFA12	ENSG00000184752.12	82681	39890	1033	5.73e-78
NDUFA13	ENSG00000186010.18	306702	131338	1217	7.31e-75
NDUFA2	ENSG00000131495.8	139111	64451	1098	3.71e-76
NDUFA4	ENSG00000189043.9	120508	59309	1011	6.61e-63
NDUFA4L2	ENSG00000185633.10	14620	3170	1905	1.04e-42
NDUFA6-AS1	ENSG00000237037.9	5280	12819	-1138	4.34e-19
NDUFA7	ENSG00000267855.5	96837	42579	1167	1.07e-86
NDUFA8	ENSG00000119421.6	57432	27360	1043	4.88e-68
NDUFAF2	ENSG00000164182.10	25060	11515	1058	2.94e-48
NDUFB6	ENSG00000165264.10	61601	29350	1044	4.29e-70
NDUFB9	ENSG00000147684.7	377752	144862	1377	4.23e-82
NDUFC2	ENSG00000151366.12	323853	140872	1195	7.89e-76
NDUFS4	ENSG00000164258.11	82081	38374	1077	1.10e-60
NDUFS6	ENSG00000145494.11	89120	35605	1300	5.13e-82
NDUFS8	ENSG00000110717.10	131060	64625	1009	1.82e-56
NEAT1	ENSG00000245532.5	124507	481719	-1943	8.36e-20
NECAB3	ENSG00000125967.16	21341	8840	1183	3.29e-60
NEDD4L	ENSG00000049759.16	25941	11405	1119	3.63e-27
NEDD8	ENSG00000129559.12	160385	77409	1041	1.17e-82
NEIL1	ENSG00000140398.13	8760	20924	-1168	7.68e-20
NEK2	ENSG00000117650.12	3210	0.110	1923	5.85e-61
NELFE	ENSG00000204356.11	58618	14750	1920	4.59e-87
NENF	ENSG00000117691.9	81311	29561	1429	8.00e-90
NES	ENSG00000132688.10	5320	1630	1265	4.91e-40
NEU1	ENSG00000204386.10	55299	15570	1765	1.65e-86
NEU4	ENSG00000204099.11	9570	24385	-1264	1.54e-13
NFKBIE	ENSG00000146232.14	11850	4040	1350	2.69e-34
NFKBIL1	ENSG00000204498.10	18870	8680	1038	5.18e-59
NFKBIZ	ENSG00000144802.11	3850	18334	-1995	3.28e-46
NGFR	ENSG00000064300.8	1250	7695	-1950	6.19e-45
NGFRAP1	ENSG00000166681.13	82928	34270	1251	8.18e-8
NHP2	ENSG00000145912.8	99332	37635	1377	2.79e-80
NHP2L1	ENSG00000100138.13	81379	35463	1176	1.34e-72
NIPAL2	ENSG00000104361.9	5820	2350	1026	1.81e-27
NKTR	ENSG00000114857.17	4610	13300	-1350	3.40e-17
NMB	ENSG00000197696.9	3430	0.835	1272	8.47e-38
NME1	ENSG00000239672.7	100099	29344	1736	1.08e-71
NME1-NME2	ENSG00000243678.11	398434	162714	1287	2.99e-62
NME2	ENSG00000011052.21	15899	5455	1389	2.06e-31
NNMT	ENSG00000166741.7	269342	1779553	-2719	2.13e-28
NOL7	ENSG00000225921.6	38550	15440	1266	4.09e-75
NOMO1	ENSG00000103512.14	31299	13774	1128	1.14e-59
NOMO2	ENSG00000185164.14	83609	35690	1205	8.02e-57
NOTCH3	ENSG00000074181.8	4320	0.925	1467	2.24e-37
NPC1L1	ENSG00000015520.14	4680	13435	-1346	7.22e-20
NPC2	ENSG00000119655.8	121456	52019	1208	1.51e-57
NPIPB3	ENSG00000169246.16	8820	24769	-1392	1.08e-15
NPIPB4	ENSG00000185864.16	4310	16340	-1707	1.22e-21
NPIPB5	ENSG00000243716.10	9710	48205	-2200	1.26e-26
NPM1	ENSG00000181163.13	485355	170378	1505	2.57e-62
NPM1P27	ENSG00000249353.2	5950	1935	1244	2.69e-45
NPM3	ENSG00000107833.10	17140	5595	1460	2.08e-34
NPY1R	ENSG00000164128.6	0.400	2240	-1211	4.33e-41
NQO1	ENSG00000181019.12	11720	1285	2477	8.95e-34
NR1I2	ENSG00000144852.16	9260	30295	-1609	3.65e-32
NR2C2AP	ENSG00000184162.14	14330	4330	1524	4.03e-82
NR4A1	ENSG00000123358.19	8570	25707	-1481	2.17e-22
NREP	ENSG00000134986.13	17250	7315	1134	4.66e-24
NRG1	ENSG00000157168.18	0.450	2870	-1416	5.54e-14
NRM	ENSG00000137404.14	8470	2630	1383	5.02e-42
NSA2	ENSG00000164346.9	56629	26857	1049	2.73e-60
NSL1	ENSG00000117697.14	13840	6095	1065	2.80e-48
NSMCE1	ENSG00000169189.16	51610	24375	1052	1.29e-70
NSMCE2	ENSG00000156831.7	20920	5565	1739	1.89e-103
NSUN5	ENSG00000130305.16	17259	7330	1132	5.18e-65
NT5DC2	ENSG00000168268.10	11390	3310	1523	9.19e-28
NTF3	ENSG00000185652.11	0.230	2445	-1486	4.35e-101
NTPCR	ENSG00000135778.11	54161	16505	1656	3.21e-86
NUDCD2	ENSG00000170584.10	15300	6895	1046	2.59e-43
NUDT1	ENSG00000106268.15	15590	2595	2206	1.30e-92
NUDT14	ENSG00000183828.14	19940	9410	1008	2.97e-25
NUDT2	ENSG00000164978.17	20569	9420	1050	1.34e-49
NUF2	ENSG00000143228.12	2480	0.130	1623	3.46e-53
NUP37	ENSG00000075188.8	10300	3445	1346	2.64e-75
NUSAP1	ENSG00000137804.12	8310	1675	1799	6.66e-43
NUTF2	ENSG00000102898.11	55861	25134	1121	1.68e-64
OAT	ENSG00000065154.11	9780	26915	-1373	1.04e-9
OGDHL	ENSG00000197444.9	18450	41286	-1120	3.70e-18
OIP5	ENSG00000104147.8	1880	0.170	1300	2.68e-48
OIT3	ENSG00000138315.12	2660	15075	-2135	1.01e-53
OLA1	ENSG00000138430.15	40941	16146	1291	6.74e-61
OLFM2	ENSG00000105088.8	31021	12169	1282	1.48e-16
OLFML2A	ENSG00000185585.19	1480	0.175	1078	7.37e-52
OLFML2B	ENSG00000162745.10	2780	0.275	1568	5.43e-51
OLFML3	ENSG00000116774.11	2830	8290	-1278	2.20e-14
OPTN	ENSG00000123240.16	50569	22641	1125	2.63e-42
OR10J6P	ENSG00000158731.2	0.620	5620	-2031	1.18e-51
OR2I1P	ENSG00000237988.3	25710	1305	3535	5.68e-48
ORM1	ENSG00000229314.5	4575773	15121356	-1724	1.94e-25
ORM2	ENSG00000228278.3	1430198	3502573	-1292	1.40e-18
ORMDL2	ENSG00000123353.9	48691	19455	1281	1.03e-82
OSGIN1	ENSG00000140961.12	89492	40993	1108	4.62e-9
OST4	ENSG00000228474.5	273879	129400	1076	2.09e-86
OXT	ENSG00000101405.3	0.130	5293	-2477	5.61e-36
P3H4	ENSG00000141696.12	3910	1290	1100	1.17e-35
P4HA2	ENSG00000072682.18	15899	5810	1311	3.77e-37
PA2G4	ENSG00000170515.13	52570	23560	1125	2.87e-55
PABPC1	ENSG00000070756.13	653570	181313	1844	5.93e-75
PABPC1L	ENSG00000101104.12	11350	31315	-1388	1.95e-6
PAFAH1B3	ENSG00000079462.7	14810	3225	1904	4.49e-53
PALM3	ENSG00000187867.8	7610	18025	-1144	1.75e-23
PAMR1	ENSG00000149090.11	0.700	2855	-1181	1.08e-31
PAN2	ENSG00000135473.14	13250	46264	-1730	1.80e-28
PAPSS1	ENSG00000138801.8	6500	2495	1102	8.20e-35
PAQR4	ENSG00000162073.13	3820	0.800	1421	1.36e-34
PARP1	ENSG00000143799.12	36990	15685	1187	1.27e-39
PARPBP	ENSG00000185480.11	1500	0.190	1071	7.17e-46
PARVB	ENSG00000188677.14	16310	6394	1227	1.34e-18
PBK	ENSG00000168078.9	2100	0.100	1495	2.85e-47
PBLD	ENSG00000108187.15	29590	69384	-1202	1.10e-19
PBXIP1	ENSG00000163346.16	38369	13510	1440	6.27e-73
PCBP1-AS1	ENSG00000179818.13	8900	20050	-1088	1.20e-6
PCK1	ENSG00000124253.10	84799	405426	-2244	7.02e-29
PCNA	ENSG00000132646.10	48090	13710	1739	2.76e-70
PDAP1	ENSG00000106244.12	72978	35554	1017	1.60e-48
PDCD2L	ENSG00000126249.7	6350	2570	1042	1.58e-57
PDCD5	ENSG00000105185.11	85241	41330	1027	4.56e-53
PDCL3	ENSG00000115539.13	11290	4515	1156	6.17e-71
PDE6D	ENSG00000156973.13	11730	5080	1066	6.68e-61
PDGFA	ENSG00000197461.13	9080	1965	1765	3.52e-30
PDGFB	ENSG00000100311.16	4050	1060	1294	6.38e-47
PDGFRA	ENSG00000134853.11	0.920	3855	-1338	3.88e-23
PDGFRB	ENSG00000113721.13	10100	4260	1077	9.92e-19
PDIA3	ENSG00000167004.12	370671	173452	1091	1.58e-56
PDIA6	ENSG00000143870.12	159155	77753	1024	5.66e-37
PDXDC2P	ENSG00000196696.12	2910	11375	-1662	6.65e-31
PDZD11	ENSG00000120509.10	30370	11065	1379	1.80e-88
PDZK1IP1	ENSG00000162366.7	15740	1505	2740	9.56e-21
PEA15	ENSG00000162734.12	45819	12420	1803	3.28e-70
PECAM1	ENSG00000261371.5	11390	3285	1532	4.19e-54
PEG10	ENSG00000242265.5	5210	0.710	1861	1.29e-17
PEMT	ENSG00000133027.17	50530	119908	-1230	8.80e-30
PES1	ENSG00000100029.17	40870	19350	1041	1.69e-54
PET100	ENSG00000229833.9	68322	29180	1200	1.03e-82
PEX11B	ENSG00000131779.10	23079	10540	1061	7.34e-74
PFDN2	ENSG00000143256.4	104959	42964	1269	3.34e-68
PFDN4	ENSG00000101132.9	21780	8525	1258	1.26e-66
PFDN6	ENSG00000204220.9	118569	41236	1501	1.25e-90
PGA3	ENSG00000229859.8	0.060	2469	-1710	6.68e-64
PGA4	ENSG00000229183.8	0.050	1700	-1362	3.14e-57
PHB	ENSG00000167085.11	120250	54451	1129	6.45e-68
PHF19	ENSG00000119403.13	6200	1995	1265	3.46e-34
PHLDA2	ENSG00000181649.5	4540	1015	1459	8.06e-14
PHLDA3	ENSG00000174307.6	6770	2530	1138	7.59e-14
PHPT1	ENSG00000054148.17	99787	48509	1026	8.70e-39
PHYHD1	ENSG00000175287.18	14710	34515	-1177	2.78e-23
PHYKPL	ENSG00000175309.14	20569	47765	-1177	2.45e-42
PIGC	ENSG00000135845.9	22070	6605	1601	1.20e-88
PIGT	ENSG00000124155.16	65050	22780	1474	1.51e-91
PIGU	ENSG00000101464.10	16750	4875	1595	1.01e-100
PIGY	ENSG00000255072.1	8940	0.005	3306	6.73e-22
PIK3IP1	ENSG00000100100.12	7000	2740	1097	1.09e-25
PIK3R2	ENSG00000105647.14	16350	6970	1122	2.70e-43
PILRB	ENSG00000121716.18	7600	26129	-1657	1.92e-18
PIR	ENSG00000087842.10	23020	9200	1236	1.83e-31
PITPNA-AS1	ENSG00000236618.2	8520	3245	1165	3.68e-46
PKM	ENSG00000067225.17	38791	13675	1439	1.32e-23
PKMYT1	ENSG00000127564.16	5720	0.695	1987	6.36e-58
PKN1	ENSG00000123143.12	44609	13205	1683	2.71e-54
PLA2G2A	ENSG00000188257.10	23811	207166	-3069	1.02e-8
PLA2G4B	ENSG00000243708.8	1460	4700	-1212	1.58e-24
PLA2G4C	ENSG00000105499.13	16410	5250	1478	3.35e-33
PLAC8	ENSG00000145287.10	1030	5975	-1781	1.91e-32
PLAU	ENSG00000122861.15	2820	0.770	1110	3.03e-29
PLCH2	ENSG00000149527.17	0.570	2500	-1157	6.74e-7
PLGLA	ENSG00000240935.6	4320	22950	-2171	3.48e-52
PLGLB1	ENSG00000183281.14	29800	74586	-1295	1.94e-28
PLGLB2	ENSG00000125551.18	65348	195780	-1568	5.61e-28
PLIN1	ENSG00000166819.11	1840	8990	-1815	3.39e-33
PLIN4	ENSG00000167676.4	4270	22554	-2160	3.47e-37
PLIN5	ENSG00000214456.8	18750	68379	-1813	1.02e-32
PLK1	ENSG00000166851.14	3770	0.765	1434	1.87e-37
PLOD1	ENSG00000083444.16	76388	36346	1051	1.08e-42
PLOD3	ENSG00000106397.11	60601	23364	1338	4.16e-62
PLP2	ENSG00000102007.10	24319	8734	1379	4.59e-17
PLSCR4	ENSG00000114698.14	5390	13155	-1147	5.16e-37
PLVAP	ENSG00000130300.8	43030	2464	3668	1.58e-157
PLXNB1	ENSG00000164050.12	30890	67290	-1099	1.03e-13
PLXND1	ENSG00000004399.12	36579	15975	1147	2.07e-34
PMF1	ENSG00000160783.19	61158	26235	1191	1.40e-73
PMS2P1	ENSG00000078319.8	5080	2010	1014	2.92e-67
PMVK	ENSG00000163344.5	77262	35510	1100	2.93e-70
PNISR	ENSG00000132424.14	11810	31325	-1335	9.30e-17
PNMA6A	ENSG00000235961.5	9820	4305	1028	2.89e-11
PNN	ENSG00000100941.8	14910	32620	-1079	4.32e-20
PNPLA7	ENSG00000130653.15	1700	5100	-1176	1.80e-55
POC1A	ENSG00000164087.7	4810	1720	1095	2.15e-48
PODN	ENSG00000174348.13	1390	3865	-1025	6.35e-13
PODXL	ENSG00000128567.16	5700	1355	1508	5.17e-40
POLA2	ENSG00000014138.8	7170	2465	1238	1.05e-54
POLD1	ENSG00000062822.12	13280	4905	1274	8.33e-50
POLR2G	ENSG00000168002.11	53772	23625	1153	4.91e-75
POLR2J2	ENSG00000267645.5	5500	2205	1020	1.63e-21
POLR2K	ENSG00000147669.10	55819	19015	1505	5.45e-100
POLR2L	ENSG00000177700.5	155448	74780	1046	1.21e-60
POLR3C	ENSG00000186141.8	10380	4260	1113	1.59e-55
PPDPF	ENSG00000125534.9	190982	72223	1391	3.78e-21
PPIA	ENSG00000196262.13	1363405	530680	1360	7.07e-92
PPIAP22	ENSG00000198618.5	165466	34006	2250	3.91e-103
PPIB	ENSG00000166794.4	710208	316299	1164	7.15e-72
PPIC	ENSG00000168938.5	23640	11080	1028	1.70e-42
PPIH	ENSG00000171960.10	16360	6630	1186	1.27e-62
PPM1G	ENSG00000115241.10	39769	17025	1177	8.53e-64
PPP1R11	ENSG00000204619.7	42579	19670	1076	1.78e-57
PPP1R3B	ENSG00000173281.4	10710	24785	-1139	4.52e-22
PPP1R3C	ENSG00000119938.8	10360	28320	-1368	1.01e-23
PPP2R1A	ENSG00000105568.17	101412	44099	1183	2.36e-70
PPT1	ENSG00000131238.16	19291	7325	1285	3.23e-44
PRAP1	ENSG00000165828.13	676102	259618	1377	3.81e-7
PRC1	ENSG00000198901.13	10680	1120	2462	8.48e-69
PRCC	ENSG00000143294.14	41280	15355	1370	5.92e-88
PRDX5	ENSG00000126432.13	278165	128230	1111	5.25e-82
PRELP	ENSG00000188783.5	1250	4320	-1241	6.01e-21
PRIM1	ENSG00000198056.13	5970	1560	1445	9.36e-53
PRIM2	ENSG00000146143.17	4040	1060	1291	8.86e-72
PRKCSH	ENSG00000130175.9	198376	98155	1008	9.82e-85
PRKDC	ENSG00000253729.7	22389	9685	1130	6.65e-21
PROZ	ENSG00000126231.13	8740	32433	-1779	1.70e-35
PRPF6	ENSG00000101161.7	40029	14020	1450	1.13e-106
PRR11	ENSG00000068489.12	1370	0.140	1056	6.16e-42
PRR34-AS1	ENSG00000241990.5	7780	3390	1000	6.75e-28
PRSS1	ENSG00000204983.12	0.000	1170	-1118	1.38e-33
PRSS2	ENSG00000275896.4	0.030	1250	-1127	1.46e-32
PRSS53	ENSG00000151006.7	0.230	4550	-2174	2.57e-72
PRSS8	ENSG00000052344.15	3000	10110	-1474	7.55e-12
PSEN2	ENSG00000143801.16	14100	6110	1087	1.69e-36
PSENEN	ENSG00000205155.7	80968	34785	1196	3.37e-75
PSMA6	ENSG00000100902.10	123974	57615	1092	1.41e-71
PSMB10	ENSG00000205220.11	59112	28645	1020	2.77e-35
PSMB3	ENSG00000277791.4	225627	100068	1165	2.01e-71
PSMB4	ENSG00000159377.10	347073	134526	1361	4.05e-99
PSMB5	ENSG00000100804.18	103421	47670	1101	8.94e-89
PSMB9	ENSG00000240065.7	50011	17194	1487	7.72e-38
PSMC1P1	ENSG00000241506.1	13250	5405	1154	2.03e-30
PSMC3	ENSG00000165916.8	107507	52736	1014	4.61e-74
PSMC4	ENSG00000013275.7	71401	32394	1116	5.74e-71
PSMD10	ENSG00000101843.18	20941	8670	1182	1.94e-49
PSMD14	ENSG00000115233.11	27460	11975	1133	3.06e-48
PSMD2	ENSG00000175166.16	81480	38550	1060	1.64e-34
PSMD4	ENSG00000159352.15	242576	78784	1610	4.67e-94
PSME1	ENSG00000092010.14	221797	100384	1136	8.20e-71
PSME2	ENSG00000100911.13	253755	120229	1071	2.07e-52
PSMG3	ENSG00000157778.8	31519	11920	1332	6.26e-72
PSPH	ENSG00000146733.13	8690	2705	1387	8.15e-45
PTENP1	ENSG00000237984.3	1980	0.390	1100	1.20e-46
PTGES3	ENSG00000110958.15	137758	65443	1062	1.09e-51
PTGFRN	ENSG00000134247.9	10950	4845	1032	8.38e-18
PTGIS	ENSG00000124212.5	0.370	1815	-1039	4.46e-23
PTH1R	ENSG00000160801.13	1320	23575	-3405	7.04e-124
PTK2	ENSG00000169398.19	22721	9610	1161	1.34e-48
PTMA	ENSG00000187514.14	508498	243570	1059	1.81e-48
PTMAP5	ENSG00000214182.5	2790	0.765	1103	2.02e-33
PTOV1-AS2	ENSG00000269352.1	2390	6895	-1220	2.51e-15
PTP4A3	ENSG00000184489.11	8630	2310	1541	3.21e-35
PTPRS	ENSG00000105426.14	0.580	2840	-1281	3.48e-11
PTRH2	ENSG00000141378.14	27851	13168	1026	1.48e-61
PTTG1	ENSG00000164611.12	20589	0.870	3529	3.17e-90
PUF60	ENSG00000179950.13	112259	47770	1216	1.84e-64
PVALB	ENSG00000100362.12	0.110	1220	-1000	3.58e-43
PVT1	ENSG00000249859.7	6010	1035	1784	3.34e-25
PXMP4	ENSG00000101417.11	10380	3335	1392	4.39e-79
PYCARD	ENSG00000103490.13	16680	4764	1617	9.55e-28
PYCR1	ENSG00000183010.16	6320	2035	1270	9.76e-11
PYCR2	ENSG00000143811.16	40649	18060	1128	9.64e-55
PYGB	ENSG00000100994.11	14470	5205	1318	2.91e-43
PYGO2	ENSG00000163348.3	15310	6875	1050	6.00e-55
PZP	ENSG00000126838.9	0.180	5140	-2379	6.15e-56
QARS	ENSG00000172053.14	101447	45099	1152	3.20e-73
RAB11FIP4	ENSG00000131242.15	5220	1225	1483	9.71e-49
RAB4A	ENSG00000168118.11	37219	17995	1009	1.16e-55
RABIF	ENSG00000183155.4	6210	2225	1161	2.09e-86
RAC1	ENSG00000136238.17	116994	54913	1077	6.51e-63
RAC3	ENSG00000169750.8	14470	6250	1093	3.37e-22
RACGAP1	ENSG00000161800.12	4610	0.705	1718	1.10e-59
RAD21	ENSG00000164754.12	33499	14025	1199	4.56e-41
RAD51	ENSG00000051180.16	1750	0.235	1155	1.39e-42
RAD51AP1	ENSG00000111247.14	1720	0.290	1076	5.94e-38
RAD51C	ENSG00000108384.14	13680	5425	1192	2.31e-62
RALY	ENSG00000125970.11	63039	26163	1237	5.94e-69
RAMP1	ENSG00000132329.10	103679	31471	1689	8.10e-18
RAMP2	ENSG00000131477.10	17270	5770	1432	1.32e-45
RAN	ENSG00000132341.11	208441	81905	1337	3.62e-50
RAP2A	ENSG00000125249.6	5380	1860	1158	1.58e-39
RASD1	ENSG00000108551.4	14230	43902	-1560	3.78e-17
RASGEF1B	ENSG00000138670.16	4630	11450	-1145	2.47e-31
RASSF3	ENSG00000153179.11	6270	2210	1179	1.46e-26
RBBP4	ENSG00000162521.18	30969	14580	1037	1.18e-17
RBM3	ENSG00000102317.17	79539	36115	1118	8.60e-29
RBM34	ENSG00000188739.14	44711	15919	1434	4.59e-82
RBM42	ENSG00000126254.11	52830	21780	1241	3.64e-81
RBM8A	ENSG00000265241.6	83152	34049	1264	8.13e-69
RBP7	ENSG00000162444.11	17259	2635	2329	6.72e-74
RCAN1	ENSG00000159200.17	17179	48371	-1441	1.58e-49
RDH16	ENSG00000139547.7	39609	193762	-2262	1.83e-32
REC8	ENSG00000100918.12	2280	7140	-1311	6.04e-26
RECQL4	ENSG00000160957.12	8650	1435	1987	5.08e-54
RELB	ENSG00000104856.13	13580	4209	1485	4.47e-34
RFC3	ENSG00000133119.12	3400	1165	1023	1.89e-38
RFC4	ENSG00000163918.10	12420	3890	1457	2.12e-51
RFWD2	ENSG00000143207.19	30789	12060	1283	6.74e-78
RFX5	ENSG00000143390.17	10550	3490	1363	6.97e-48
RFXANK	ENSG00000064490.13	44099	17625	1276	2.78e-66
RGCC	ENSG00000102760.12	11910	2120	2049	1.73e-51
RGS10	ENSG00000148908.14	7600	1915	1561	5.07e-41
RGS5	ENSG00000143248.12	18010	4010	1924	1.37e-44
RHNO1	ENSG00000171792.10	6630	1770	1462	1.60e-64
RHOA	ENSG00000067560.10	154396	75585	1021	1.95e-56
RHOC	ENSG00000155366.16	174755	63284	1451	3.14e-61
RIC3	ENSG00000166405.14	0.070	1775	-1375	2.60e-55
RIPK2	ENSG00000104312.7	6290	2515	1052	2.22e-30
RMI2	ENSG00000175643.8	3390	0.470	1578	2.10e-48
RNA5SP216	ENSG00000251920.1	0.000	7302	-3054	4.89e-34
RNASE1	ENSG00000129538.13	56531	18800	1539	6.06e-37
RNASEH2A	ENSG00000104889.4	16151	2735	2199	1.93e-90
RNASET2	ENSG00000026297.15	42860	17460	1248	3.05e-43
RND3	ENSG00000115963.13	9270	21980	-1162	4.40e-28
RNF152	ENSG00000176641.10	2870	7370	-1113	1.61e-40
RNF157	ENSG00000141576.14	3300	0.580	1444	2.72e-30
RNF165	ENSG00000141622.13	0.160	1530	-1125	1.52e-80
RNF181	ENSG00000168894.9	192417	83178	1200	1.50e-82
RNF185-AS1	ENSG00000254835.1	3090	0.212	1755	1.65e-10
RNF187	ENSG00000168159.10	55749	23695	1200	1.42e-63
RNU4-2	ENSG00000202538.1	13670	5598	1153	5.22e-6
ROBO1	ENSG00000169855.19	9190	1070	2299	9.35e-47
ROMO1	ENSG00000125995.15	249154	86933	1508	1.40e-86
RP1-102E24.8	ENSG00000256433.2	0.270	2495	-1460	8.93e-68
RP1-232P20.1	ENSG00000269985.1	0.060	1595	-1292	1.14e-37
RP1-241P17.4	ENSG00000228532.4	3770	0.740	1455	1.04e-21
RP11-10G12.1	ENSG00000244538.1	2990	0.000	1996	1.66e-90
RP11-111M22.3	ENSG00000255135.3	4520	1645	1061	9.90e-47
RP11-1143G9.4	ENSG00000257764.2	17640	3005	2219	3.30e-25
RP11-115C10.1	ENSG00000254607.2	1930	7789	-1585	1.61e-4
RP11-115J16.1	ENSG00000254235.5	0.560	3090	-1391	1.26e-12
RP11-119D9.1	ENSG00000251637.6	4610	10829	-1076	1.59e-4
RP11-1259L22.2	ENSG00000271681.1	0.320	2325	-1333	9.74e-30
RP11-128M1.1	ENSG00000226644.5	1610	0.240	1074	6.85e-46
RP11-132A1.6	ENSG00000278683.1	1100	6998	-1929	5.21e-61
RP11-138I1.4	ENSG00000265401.1	198074	98400	1002	1.88e-28
RP11-159D12.2	ENSG00000264112.1	1000	3940	-1305	5.67e-23
RP11-161H23.5	ENSG00000258232.2	58602	23370	1290	1.26e-33
RP11-164J13.1	ENSG00000258461.5	0.770	2985	-1171	1.14e-33
RP11-166B2.1	ENSG00000234719.8	0.870	3453	-1252	1.56e-29
RP11-175B9.3	ENSG00000236439.4	1410	4860	-1282	6.20e-24
RP11-196G11.1	ENSG00000255439.6	0.570	2975	-1340	1.19e-64
RP11-203J24.9	ENSG00000257524.5	1670	4945	-1155	1.21e-21
RP11-215A21.2	ENSG00000236058.3	2320	0.170	1505	2.72e-74
RP11-228B15.4	ENSG00000225032.5	0.380	2354	-1281	4.61e-43
RP11-231C14.4	ENSG00000169203.16	6940	27937	-1866	4.03e-29
RP11-238F2.1	ENSG00000271239.1	0.140	2040	-1415	1.40e-6
RP11-250B2.3	ENSG00000233967.6	0.500	2480	-1214	9.73e-58
RP11-256L6.3	ENSG00000257878.1	0.830	3320	-1239	1.31e-25
RP11-258F1.2	ENSG00000279428.1	0.230	1655	-1110	3.39e-46
RP11-274B21.3	ENSG00000243679.1	4960	12679	-1199	1.96e-18
RP11-284F21.10	ENSG00000272405.1	1990	0.060	1496	3.01e-35
RP11-286N22.16	ENSG00000279878.1	0.060	1165	-1030	1.72e-38
RP11-290F5.1	ENSG00000249096.6	3190	20870	-2384	6.31e-48
RP11-295G20.2	ENSG00000233461.5	20340	5555	1703	2.77e-41
RP11-295P9.3	ENSG00000239665.8	3580	10585	-1339	6.11e-16
RP11-316M1.12	ENSG00000259357.2	78699	24778	1628	4.11e-25
RP11-326C3.2	ENSG00000255026.1	0.960	7133	-2053	7.74e-14
RP11-328K4.1	ENSG00000248740.5	3020	13645	-1865	5.66e-21
RP11-334E6.12	ENSG00000263873.1	6870	0.460	2430	1.64e-59
RP11-345J4.5	ENSG00000261740.5	18040	5385	1576	8.27e-72
RP11-345J4.6	ENSG00000260335.1	2120	0.000	1642	5.63e-6
RP11-347C12.1	ENSG00000198064.13	0.370	1890	-1077	8.70e-41
RP11-34P13.16	ENSG00000269981.1	0.850	2820	-1046	2.20e-16
RP11-35N6.1	ENSG00000148123.14	3710	1305	1031	2.20e-27
RP11-361L15.3	ENSG00000280416.1	20530	65360	-1624	3.94e-8
RP11-369J21.12	ENSG00000279399.1	1730	0.330	1038	1.05e-9
RP11-384K6.2	ENSG00000225892.3	1460	4205	-1081	1.97e-37
RP11-386G11.10	ENSG00000258017.1	69622	32095	1094	6.08e-16
RP11-390F4.3	ENSG00000225489.6	1260	4439	-1267	1.02e-41
RP11-394B2.1	ENSG00000279569.1	0.230	1495	-1020	6.88e-49
RP11-394O4.5	ENSG00000269936.3	0.480	2335	-1172	2.22e-28
RP11-404G16.2	ENSG00000244062.1	0.350	2570	-1403	5.82e-33
RP11-40C6.2	ENSG00000219928.2	389910	0.000	8611	1.13e-106
RP11-415J8.3	ENSG00000225313.5	0.740	3800	-1464	4.43e-45
RP11-419C5.2	ENSG00000226232.8	2460	11160	-1813	1.74e-31
RP11-423H2.3	ENSG00000249684.5	0.190	1485	-1062	2.95e-21
RP11-42O15.3	ENSG00000271992.1	4660	11395	-1131	1.85e-19
RP11-434D9.1	ENSG00000249364.5	1320	11964	-2482	1.19e-34
RP11-43N16.4	ENSG00000279861.1	0.690	3215	-1318	9.50e-37
RP11-443P15.2	ENSG00000171658.8	1780	0.020	1447	9.26e-34
RP11-452F19.3	ENSG00000228106.5	11780	4120	1320	3.35e-58
RP11-452I5.2	ENSG00000266036.1	7380	2750	1160	2.84e-21
RP11-452N17.1	ENSG00000277998.1	37569	5960	2470	3.33e-72
RP11-458F8.4	ENSG00000273142.1	1310	3715	-1029	2.51e-23
RP11-464D20.2	ENSG00000239246.3	2610	0.350	1419	5.09e-57
RP11-465N4.4	ENSG00000234678.1	4770	1630	1134	1.18e-23
RP11-475C16.1	ENSG00000218426.5	15420	7145	1011	5.76e-34
RP11-480I12.5	ENSG00000214796.8	3390	0.955	1167	1.13e-32
RP11-496I9.1	ENSG00000254815.5	0.650	2600	-1125	5.19e-15
RP11-499P20.2	ENSG00000240291.1	2100	7765	-1499	3.51e-28
RP11-49K24.6	ENSG00000267228.6	3590	1135	1104	1.20e-10
RP11-510N19.5	ENSG00000249007.1	0.270	1560	-1011	1.70e-23
RP11-51O6.1	ENSG00000224631.4	21640	8325	1280	6.44e-58
RP11-524F11.1	ENSG00000265511.1	0.370	2685	-1427	1.49e-57
RP11-556E13.1	ENSG00000228651.1	1140	0.000	1098	2.58e-28
RP11-575L7.8	ENSG00000235298.1	0.440	2520	-1289	3.09e-34
RP11-579D7.2	ENSG00000257653.1	1950	0.330	1149	3.02e-33
RP11-609D21.3	ENSG00000279296.1	1080	3600	-1145	1.41e-17
RP11-61N20.3	ENSG00000226268.3	6120	1490	1516	1.49e-32
RP11-620J15.3	ENSG00000257698.1	5080	1055	1565	6.54e-65
RP11-622A1.2	ENSG00000250436.1	5560	23667	-1911	4.27e-36
RP11-632K20.7	ENSG00000223509.8	1680	5815	-1346	1.52e-35
RP11-641D5.1	ENSG00000213178.3	174126	60058	1520	2.16e-66
RP11-667K14.4	ENSG00000262533.1	6330	0.655	2147	3.67e-31
RP11-66N24.3	ENSG00000258727.1	1310	5550	-1504	1.67e-25
RP11-676J12.7	ENSG00000262003.1	0.110	1625	-1242	2.33e-29
RP11-680F8.1	ENSG00000256802.2	3770	1305	1049	4.07e-24
RP11-69E11.4	ENSG00000182109.7	0.830	3935	-1431	1.00e-33
RP11-6B4.1	ENSG00000243694.2	0.170	4765	-2301	5.43e-59
RP11-713M15.2	ENSG00000272502.1	10170	3250	1394	2.13e-43
RP11-715H19.2	ENSG00000279444.1	0.000	1020	-1014	7.41e-23
RP11-73M18.2	ENSG00000256500.5	1310	0.000	1208	7.62e-32
RP11-756A22.7	ENSG00000273628.1	2130	0.000	1646	6.04e-23
RP11-817J15.3	ENSG00000281655.1	0.040	1375	-1191	9.35e-31
RP11-830F9.5	ENSG00000259881.1	0.040	1390	-1200	1.85e-69
RP11-977G19.10	ENSG00000144785.8	1010	0.000	1007	2.68e-19
RP13-516M14.10	ENSG00000275888.1	0.380	1960	-1101	2.49e-42
RP3-342P20.2	ENSG00000228477.1	0.100	3960	-2173	6.10e-63
RP3-417G15.1	ENSG00000227008.2	2940	0.940	1022	3.03e-39
RP3-461F17.3	ENSG00000268439.5	7650	1780	1638	1.10e-48
RP3-508I15.20	ENSG00000273096.1	0.000	1745	-1457	1.20e-32
RP4-564F22.6	ENSG00000275285.1	0.540	5865	-2156	2.29e-62
RP4-568C11.4	ENSG00000274173.1	1020	3250	-1073	5.68e-11
RP4-583P15.15	ENSG00000273154.3	2090	7120	-1394	1.29e-40
RP4-631H13.6	ENSG00000230953.2	0.000	1500	-1322	6.78e-8
RP4-669L17.10	ENSG00000237094.11	3090	8316	-1188	3.12e-17
RP4-706A16.3	ENSG00000226084.5	22420	9355	1177	1.34e-38
RP4-763G1.2	ENSG00000235200.1	5400	19574	-1685	3.69e-23
RP5-890E16.4	ENSG00000266341.1	4320	0.000	2411	3.45e-19
RP5-940J5.9	ENSG00000269968.1	20359	2015	2825	8.17e-7
RP5-966M1.6	ENSG00000243696.4	6860	66160	-3095	6.45e-52
RPL12	ENSG00000197958.12	922752	451379	1030	1.32e-45
RPL13AP5	ENSG00000236552.2	68802	31064	1122	4.14e-44
RPL14	ENSG00000188846.13	706917	314714	1165	1.64e-61
RPL14P1	ENSG00000139239.7	9550	3850	1121	7.29e-50
RPL15	ENSG00000174748.18	755139	377046	1000	9.06e-55
RPL15P3	ENSG00000212802.4	8690	3015	1271	7.38e-49
RPL19	ENSG00000108298.9	1450263	637353	1185	8.51e-77
RPL22L1	ENSG00000163584.17	61469	28814	1067	2.22e-24
RPL23	ENSG00000125691.12	944625	439386	1102	3.80e-58
RPL23A	ENSG00000198242.13	690213	342330	1010	5.06e-47
RPL23AP42	ENSG00000234851.4	644751	238359	1432	8.25e-71
RPL23AP65	ENSG00000243964.1	2830	0.525	1329	2.34e-37
RPL23AP82	ENSG00000184319.15	9590	4100	1054	4.55e-50
RPL24	ENSG00000114391.12	884733	404767	1126	1.96e-65
RPL24P4	ENSG00000181524.6	9020	3245	1239	1.83e-47
RPL26L1	ENSG00000037241.7	43989	19929	1104	1.74e-79
RPL27	ENSG00000131469.12	1270164	553580	1197	4.32e-69
RPL27A	ENSG00000166441.12	1599050	693570	1204	7.74e-65
RPL28	ENSG00000108107.12	1238089	565741	1129	3.02e-50
RPL29	ENSG00000162244.10	1049145	487919	1103	3.13e-61
RPL30	ENSG00000156482.10	1964708	654091	1585	2.12e-82
RPL31	ENSG00000071082.10	1529028	743015	1040	7.72e-51
RPL32	ENSG00000144713.12	1338312	560083	1255	6.04e-64
RPL35A	ENSG00000182899.14	803914	353091	1185	5.01e-66
RPL35P5	ENSG00000225573.4	5170	1380	1374	1.50e-58
RPL36	ENSG00000130255.12	739803	336869	1133	1.09e-56
RPL36A	ENSG00000241343.9	883691	296337	1573	1.20e-74
RPL37	ENSG00000145592.13	1566576	594465	1396	1.78e-82
RPL37A	ENSG00000197756.9	2021064	985047	1036	2.14e-45
RPL37P6	ENSG00000241431.1	2030	0.000	1599	1.94e-52
RPL38	ENSG00000172809.12	1230730	457934	1424	6.48e-82
RPL39	ENSG00000198918.7	1924809	846930	1183	4.11e-58
RPL39L	ENSG00000163923.9	5420	1460	1384	2.65e-17
RPL39P3	ENSG00000235174.1	319151	110798	1518	3.97e-26
RPL39P40	ENSG00000226580.1	1670	0.000	1417	2.46e-3
RPL4	ENSG00000174444.14	1141566	557933	1032	5.08e-49
RPL41	ENSG00000279483.1	2353512	831227	1500	2.95e-71
RPL41P2	ENSG00000256338.2	37139	17225	1065	7.43e-26
RPL5	ENSG00000122406.12	560899	273187	1035	3.34e-52
RPL6	ENSG00000089009.15	779064	371739	1065	8.14e-67
RPL6P27	ENSG00000235552.4	12270	4930	1162	1.72e-41
RPL7	ENSG00000147604.13	1178470	467589	1332	1.96e-55
RPL7P1	ENSG00000214485.6	20549	5000	1845	8.64e-61
RPL7P9	ENSG00000137970.7	28391	9160	1533	6.36e-64
RPL8	ENSG00000161016.15	1876722	569775	1718	2.94e-72
RPLP0	ENSG00000089157.15	1398049	655112	1092	1.08e-51
RPLP0P6	ENSG00000213553.4	13890	4415	1459	4.12e-57
RPLP1	ENSG00000137818.11	1491242	599659	1313	9.12e-80
RPLP2	ENSG00000177600.8	879597	343329	1355	3.03e-64
RPN1	ENSG00000163902.11	160362	76362	1061	1.16e-63
RPN2	ENSG00000118705.16	201829	74294	1430	1.09e-96
RPP21	ENSG00000241370.5	44901	18170	1260	4.61e-73
RPP40	ENSG00000124787.13	7110	3025	1011	1.44e-46
RPS10	ENSG00000124614.13	973069	427846	1184	1.50e-53
RPS11	ENSG00000142534.6	1591310	734489	1114	6.98e-66
RPS12P21	ENSG00000243930.1	0.070	1170	-1020	5.17e-62
RPS13	ENSG00000110700.6	649415	322018	1010	2.67e-62
RPS14	ENSG00000164587.11	955822	419331	1187	6.97e-64
RPS16	ENSG00000105193.8	1328515	622443	1093	8.82e-56
RPS18	ENSG00000231500.6	2144461	874278	1293	2.21e-61
RPS19	ENSG00000105372.6	1703043	813895	1064	2.27e-47
RPS20	ENSG00000008988.9	1550372	610077	1344	5.57e-67
RPS21	ENSG00000171858.17	1270692	486517	1383	1.44e-67
RPS23	ENSG00000186468.12	1376605	648044	1086	7.38e-56
RPS24	ENSG00000138326.18	1646514	799358	1042	1.05e-50
RPS27	ENSG00000177954.11	3269149	1428860	1193	2.19e-55
RPS28P7	ENSG00000227097.5	722222	182518	1979	2.56e-96
RPS2P55	ENSG00000216866.5	2260	0.330	1293	2.26e-66
RPS3AP6	ENSG00000234797.5	12820	5885	1005	5.76e-36
RPS4X	ENSG00000198034.10	486365	194576	1317	7.32e-55
RPS6	ENSG00000137154.12	1117066	553925	1011	2.63e-40
RPS7	ENSG00000171863.12	895903	394121	1183	3.22e-65
RPSA	ENSG00000168028.13	680380	312941	1118	8.28e-46
RRAGD	ENSG00000025039.14	8760	3255	1198	2.79e-34
RRM1	ENSG00000167325.14	13680	4735	1356	1.21e-58
RRM2	ENSG00000171848.13	9260	0.595	2685	6.26e-59
RRN3P1	ENSG00000248124.7	1240	5655	-1571	2.89e-48
RRP15	ENSG00000067533.5	4320	1655	1003	2.58e-34
RRP9	ENSG00000114767.6	12340	5515	1034	2.24e-50
RRS1	ENSG00000179041.3	16000	4470	1636	6.95e-45
RSPO3	ENSG00000146374.13	0.060	1570	-1278	3.23e-56
RSRP1	ENSG00000117616.17	16950	36530	-1064	4.67e-8
RTN2	ENSG00000125744.11	5100	1680	1187	1.25e-25
RTP4	ENSG00000136514.2	5180	1725	1181	3.04e-29
RUFY3	ENSG00000018189.12	6880	14950	-1017	7.04e-26
RUSC1	ENSG00000160753.15	10760	4850	1007	5.08e-35
RUVBL1	ENSG00000175792.11	17349	7765	1066	2.34e-47
RUVBL2	ENSG00000183207.12	50822	22285	1154	2.23e-80
S100A10	ENSG00000197747.8	241168	54345	2129	1.02e-48
S100A11	ENSG00000163191.5	77321	36376	1067	3.49e-15
S100A12	ENSG00000163221.8	0.190	3425	-1895	4.19e-85
S100A13	ENSG00000189171.13	75290	27839	1403	9.06e-24
S100A4	ENSG00000196154.11	29250	13083	1103	2.43e-15
S100A6	ENSG00000197956.9	69070	28380	1254	4.97e-16
S100A8	ENSG00000143546.9	3420	29025	-2764	1.38e-56
S100A9	ENSG00000163220.10	11290	46889	-1962	8.64e-23
S100P	ENSG00000163993.6	6050	2360	1069	3.42e-7
SAA1	ENSG00000173432.10	287157	4468423	-3955	3.13e-28
SAA2	ENSG00000134339.8	105360	2489516	-4549	5.66e-30
SAA2-SAA4	ENSG00000255071.3	2750	17052	-2267	3.44e-13
SAA4	ENSG00000148965.8	251479	770846	-1612	6.85e-26
SAC3D1	ENSG00000168061.13	13780	4470	1434	1.02e-83
SAE1	ENSG00000142230.11	33261	12505	1343	9.86e-66
SAMD1	ENSG00000141858.11	17890	7820	1099	1.54e-43
SAMD5	ENSG00000203727.3	0.480	2470	-1229	1.03e-33
SAMM50	ENSG00000100347.14	30890	14730	1020	2.99e-50
SATB1	ENSG00000182568.16	1650	4965	-1170	2.70e-32
SCAMP3	ENSG00000116521.10	85793	25355	1720	5.52e-96
SCAMP5	ENSG00000198794.11	3870	0.690	1527	1.34e-31
SCARA3	ENSG00000168077.13	3690	1065	1183	2.10e-27
SCARNA12	ENSG00000238795.1	0.370	1865	-1064	1.00e-31
SCD	ENSG00000099194.5	205457	85176	1260	9.85e-8
SCNM1	ENSG00000163156.11	33210	10825	1533	3.37e-80
SCPEP1	ENSG00000121064.12	25849	11890	1059	4.52e-14
SDC2	ENSG00000169439.11	176557	68859	1346	6.43e-39
SDS	ENSG00000135094.10	58318	343496	-2538	1.25e-16
SEC11C	ENSG00000166562.8	180330	89390	1004	5.12e-31
SEC14L4	ENSG00000133488.14	2040	5920	-1187	4.26e-16
SEC31B	ENSG00000075826.16	1220	5160	-1472	3.46e-35
SEC61G	ENSG00000132432.13	167195	79423	1064	4.23e-44
SECTM1	ENSG00000141574.7	5340	2085	1039	2.14e-23
SELM	ENSG00000198832.10	33981	12185	1408	7.51e-15
SEMA3F	ENSG00000001617.11	5440	1655	1278	6.29e-56
SEMA3G	ENSG00000010319.6	1930	0.435	1030	1.45e-36
SEP6	ENSG00000125354.22	22060	9535	1130	4.42e-21
SERF1B	ENSG00000205572.9	18650	6190	1450	1.52e-74
SERPINA3	ENSG00000196136.16	370748	888913	-1259	9.11e-15
SERPINB1	ENSG00000021355.12	26379	10953	1196	1.28e-30
SERPIND1	ENSG00000099937.10	344389	146027	1232	8.63e-8
SERPINE1	ENSG00000106366.8	20831	46290	-1115	4.62e-8
SERPINH1	ENSG00000149257.13	37121	15610	1199	2.60e-24
SERPINI1	ENSG00000163536.12	3560	0.940	1233	4.76e-39
SEZ6L2	ENSG00000174938.14	2880	0.205	1687	7.53e-28
SF3B4	ENSG00000143368.9	35839	10790	1644	1.21e-81
SFN	ENSG00000175793.11	9740	0.605	2742	8.38e-35
SFRP5	ENSG00000120057.4	0.050	4030	-2260	8.37e-23
SH3BGRL3	ENSG00000142669.13	70629	32565	1094	3.58e-30
SH3BP5-AS1	ENSG00000224660.1	0.900	3050	-1092	9.41e-30
SHARPIN	ENSG00000179526.16	59272	24240	1256	3.78e-71
SHC1	ENSG00000160691.18	58189	27290	1065	1.33e-28
SHFM1	ENSG00000127922.9	305070	97133	1641	2.23e-105
SHISA4	ENSG00000198892.6	11060	3830	1320	8.19e-28
SIK1	ENSG00000142178.7	1570	4180	-1011	3.14e-7
SKA1	ENSG00000154839.9	1330	0.040	1164	3.57e-46
SKA2	ENSG00000182628.12	14760	6375	1096	2.53e-52
SKA3	ENSG00000165480.15	1160	0.070	1013	3.53e-46
SKAP1	ENSG00000141293.15	7370	17729	-1162	1.17e-13
SLAIN1	ENSG00000139737.21	0.630	2575	-1133	2.09e-27
SLAMF8	ENSG00000158714.10	2050	0.415	1108	2.95e-27
SLC10A1	ENSG00000100652.4	33819	69567	-1019	7.54e-6
SLC11A1	ENSG00000018280.16	0.590	2335	-1069	4.45e-31
SLC12A5	ENSG00000124140.12	2370	0.515	1153	1.51e-30
SLC13A5	ENSG00000141485.15	60400	161954	-1408	4.26e-25
SLC17A9	ENSG00000101194.17	29769	90333	-1570	3.73e-15
SLC22A1	ENSG00000175003.12	56102	495588	-3120	5.42e-36
SLC25A18	ENSG00000182902.13	21470	46775	-1088	1.40e-15
SLC25A27	ENSG00000153291.15	2230	11030	-1897	2.06e-33
SLC25A37	ENSG00000147454.13	4400	12924	-1367	6.76e-49
SLC25A39	ENSG00000013306.15	125382	59779	1056	1.31e-63
SLC25A47	ENSG00000140107.10	13850	213567	-3853	2.24e-49
SLC25A6	ENSG00000169100.12	110063	52654	1050	1.24e-36
SLC27A5	ENSG00000083807.9	248413	497947	-1000	1.51e-10
SLC28A1	ENSG00000156222.11	8970	30939	-1680	4.15e-28
SLC29A1	ENSG00000112759.16	46571	22445	1021	4.68e-23
SLC35B2	ENSG00000157593.16	32739	13990	1170	6.10e-58
SLC35F6	ENSG00000213699.8	16660	7180	1110	9.62e-50
SLC38A6	ENSG00000139974.15	6790	2240	1266	2.44e-74
SLC39A1	ENSG00000143570.17	72098	29340	1269	2.27e-55
SLC39A14	ENSG00000104635.13	54681	160457	-1536	3.32e-47
SLC39A3	ENSG00000141873.10	29300	11910	1231	4.85e-71
SLC39A5	ENSG00000139540.11	52399	108891	-1041	1.66e-12
SLC39A7	ENSG00000112473.16	107157	45144	1229	6.15e-57
SLC3A1	ENSG00000138079.13	0.660	2480	-1068	8.59e-3
SLC41A3	ENSG00000114544.15	18379	6215	1425	9.47e-85
SLC43A2	ENSG00000167703.14	4480	1570	1092	4.38e-25
SLC44A3	ENSG00000143036.16	6790	1630	1567	1.13e-36
SLC46A3	ENSG00000139508.14	11350	23705	-1000	3.01e-19
SLC50A1	ENSG00000169241.17	65289	24135	1399	7.29e-58
SLC51B	ENSG00000186198.3	3870	0.415	1783	1.83e-30
SLC52A2	ENSG00000185803.8	14780	5380	1307	1.01e-48
SLC6A13	ENSG00000010379.15	2290	11890	-1970	9.84e-37
SLC6A8	ENSG00000130821.15	3290	1050	1065	5.70e-14
SLC7A2	ENSG00000003989.16	14440	46174	-1611	8.03e-35
SLCO1B3	ENSG00000111700.12	1890	30546	-3448	1.89e-32
SLX1A-SULT1A3	ENSG00000213599.9	2040	6450	-1293	8.66e-22
SLX1B-SULT1A4	ENSG00000260280.5	0.990	3245	-1093	7.40e-21
SMARCA4	ENSG00000127616.17	29769	13425	1093	1.06e-53
SMARCE1	ENSG00000073584.18	49050	20464	1221	1.44e-58
SMG1P7	ENSG00000261556.8	1050	4145	-1328	7.48e-40
SMIM11	ENSG00000205670.10	4770	1320	1314	3.20e-18
SMIM24	ENSG00000095932.6	1550	6257	-1509	1.51e-3
SMIM4	ENSG00000168273.7	34900	9335	1796	1.19e-79
SMO	ENSG00000128602.9	16500	7110	1110	9.12e-22
SMOX	ENSG00000088826.17	4760	1820	1030	9.46e-10
SMS	ENSG00000102172.15	25701	11905	1049	1.86e-49
SMUG1P1	ENSG00000267444.1	0.000	1055	-1039	2.06e-65
SMYD2	ENSG00000143499.13	30199	12820	1175	4.37e-43
SMYD3	ENSG00000185420.18	13120	3060	1798	5.03e-74
SNAPIN	ENSG00000143553.10	32479	15445	1026	1.54e-64
SNCG	ENSG00000173267.13	6780	1720	1516	4.03e-31
SND1	ENSG00000197157.10	82521	38050	1097	6.12e-72
SNF8	ENSG00000159210.9	88101	39810	1127	5.70e-70
SNHG6	ENSG00000245910.8	110921	47349	1211	5.94e-42
SNRPB	ENSG00000125835.17	126473	35895	1789	7.61e-86
SNRPB2	ENSG00000125870.10	28699	12590	1128	6.24e-69
SNRPC	ENSG00000124562.9	118742	39239	1573	1.41e-98
SNRPD1	ENSG00000167088.10	42220	14700	1461	4.71e-73
SNRPD2	ENSG00000125743.10	193165	70121	1449	3.35e-72
SNRPD3	ENSG00000100028.11	99401	46269	1087	3.26e-62
SNRPE	ENSG00000182004.12	137548	38494	1811	1.84e-100
SNRPEP2	ENSG00000256968.1	7970	1610	1781	1.43e-81
SNRPF	ENSG00000139343.10	27971	13225	1026	8.96e-55
SNRPGP10	ENSG00000235363.1	1810	5694	-1252	3.24e-26
SNRPGP15	ENSG00000224543.4	0.250	1765	-1145	1.02e-29
SNRPGP2	ENSG00000264350.1	9320	2870	1415	1.01e-48
SNX15	ENSG00000110025.12	9930	4415	1013	4.17e-56
SNX29P2	ENSG00000271699.5	0.590	3925	-1631	3.77e-59
SNX8	ENSG00000106266.8	17730	5430	1542	7.77e-68
SOCS3	ENSG00000184557.4	6840	20916	-1483	6.11e-16
SORL1	ENSG00000137642.12	6550	15000	-1084	4.73e-27
SORT1	ENSG00000134243.11	7080	1660	1603	6.84e-45
SOWAHA	ENSG00000198944.5	2790	0.565	1276	2.74e-42
SOX12	ENSG00000177732.7	4260	1510	1067	1.21e-35
SOX18	ENSG00000203883.6	4610	1780	1013	5.15e-34
SOX4	ENSG00000124766.5	3070	0.710	1251	4.25e-20
SOX9	ENSG00000125398.5	4950	1000	1573	4.61e-24
SOX9-AS1	ENSG00000234899.9	2870	0.720	1170	2.52e-26
SPA17	ENSG00000064199.6	2840	0.750	1134	8.33e-43
SPAG4	ENSG00000061656.9	6140	2210	1154	8.42e-25
SPAG5-AS1	ENSG00000227543.4	0.500	2125	-1059	3.01e-39
SPARC	ENSG00000113140.10	214881	65260	1704	9.59e-39
SPARCL1	ENSG00000152583.12	19100	4845	1782	1.24e-28
SPATC1L	ENSG00000160284.14	3810	0.410	1770	3.35e-42
SPATS2	ENSG00000123352.17	5640	2025	1134	8.10e-41
SPC24	ENSG00000161888.11	5150	0.330	2209	4.70e-74
SPC25	ENSG00000152253.8	2110	0.160	1423	5.11e-52
SPCS1	ENSG00000114902.13	167846	78948	1079	2.59e-68
SPCS2P4	ENSG00000228589.3	30960	12140	1282	1.21e-58
SPG20	ENSG00000133104.12	1550	5410	-1330	4.93e-28
SPINK1	ENSG00000164266.10	187155	23855	2920	3.51e-7
SPNS1	ENSG00000169682.17	31600	13335	1185	4.33e-69
SPON2	ENSG00000159674.11	94851	45069	1057	4.93e-21
SPP1	ENSG00000118785.13	75378	8524	3004	5.95e-21
SPRR3	ENSG00000163209.14	0.000	1315	-1211	3.55e-44
SPSB2	ENSG00000111671.9	6750	2240	1258	5.01e-63
SPTBN2	ENSG00000173898.11	8040	18735	-1126	2.04e-20
SPTSSA	ENSG00000165389.6	24609	11130	1078	1.50e-28
SQLE	ENSG00000104549.11	36309	9635	1811	3.41e-32
SQSTM1	ENSG00000161011.19	460225	152900	1583	3.64e-48
SRC	ENSG00000197122.11	8850	3365	1174	3.98e-16
SRD5A2	ENSG00000277893.1	1170	6605	-1809	3.72e-20
SRD5A3	ENSG00000128039.10	15240	6015	1211	1.18e-60
SRP14	ENSG00000140319.10	253474	113165	1156	5.62e-83
SRP9	ENSG00000143742.12	168685	79500	1076	4.64e-59
SRPX	ENSG00000101955.14	0.840	5530	-1827	9.82e-44
SRRM2	ENSG00000167978.16	123442	265349	-1098	2.93e-14
SRSF11	ENSG00000116754.13	25310	68614	-1404	6.48e-19
SRXN1	ENSG00000271303.1	30141	10395	1450	3.04e-33
SSR1	ENSG00000124783.12	43609	20554	1049	1.12e-32
SSR2	ENSG00000163479.13	259267	82939	1633	6.75e-77
SSR3	ENSG00000114850.6	89059	40774	1108	6.92e-45
ST14	ENSG00000149418.10	8050	2715	1285	8.53e-17
ST8SIA6-AS1	ENSG00000204832.9	3810	0.000	2266	2.76e-33
STAB2	ENSG00000136011.14	0.080	3505	-2060	1.19e-127
STAG3L5P	ENSG00000242294.6	5220	13125	-1183	1.17e-12
STAG3L5P-PVRIG2P-PILRB	ENSG00000272752.5	14780	42150	-1451	2.12e-16
STAP2	ENSG00000178078.11	66680	31891	1041	4.30e-25
STARD5	ENSG00000172345.13	6450	19359	-1450	1.12e-49
STAT1	ENSG00000115415.18	38620	17540	1096	7.69e-25
STC1	ENSG00000159167.11	2250	0.325	1294	8.92e-28
STEAP3	ENSG00000115107.19	19849	62630	-1610	1.44e-44
STEAP4	ENSG00000127954.12	0.770	4240	-1566	2.37e-44
STIP1	ENSG00000168439.16	52570	22525	1187	2.25e-35
STK39	ENSG00000198648.10	2720	0.525	1286	2.93e-31
STMN1	ENSG00000117632.20	56668	6280	2986	6.92e-92
STT3A	ENSG00000134910.12	76882	32829	1203	5.24e-54
STXBP6	ENSG00000168952.15	6170	1340	1615	1.91e-48
STYXL1	ENSG00000127952.16	31679	14210	1103	1.08e-45
SUB1	ENSG00000113387.11	184144	73124	1321	6.32e-78
SUCO	ENSG00000094975.13	6030	2250	1113	3.61e-39
SULT1B1	ENSG00000173597.8	1050	3175	-1026	1.87e-14
SULT1C2	ENSG00000198203.9	4090	0.350	1915	5.16e-26
SULT1E1	ENSG00000109193.10	1410	5650	-1464	4.17e-10
SUMO2	ENSG00000188612.11	146859	49280	1556	9.40e-75
SUMO2P1	ENSG00000235238.1	1160	0.000	1111	2.90e-9
SUPT4H1	ENSG00000213246.6	66192	30304	1102	3.92e-71
SUSD4	ENSG00000143502.14	3920	1295	1100	3.48e-10
SWAP70	ENSG00000133789.14	5090	1985	1029	1.21e-32
SYNGR1	ENSG00000100321.14	6500	2715	1014	2.65e-11
SYNGR2	ENSG00000108639.7	83169	40321	1026	1.80e-48
SYT7	ENSG00000011347.9	6730	21180	-1521	4.04e-17
SYT9	ENSG00000170743.16	0.010	1260	-1162	1.24e-50
TACC3	ENSG00000013810.18	10260	3130	1447	6.91e-40
TAF1C	ENSG00000103168.16	6940	14985	-1010	1.64e-15
TAF9	ENSG00000273841.4	33171	15970	1010	3.83e-42
TAGLN2	ENSG00000158710.14	252545	76164	1716	4.27e-52
TALDO1	ENSG00000177156.10	149955	65534	1182	9.21e-64
TAP1	ENSG00000168394.10	22079	9690	1110	8.84e-26
TAP2	ENSG00000204267.13	17289	7240	1150	1.47e-25
TARBP1	ENSG00000059588.9	14100	5620	1190	5.37e-40
TAT	ENSG00000198650.10	98250	345525	-1804	1.65e-18
TATDN1	ENSG00000147687.16	22869	8720	1296	1.71e-69
TATDN3	ENSG00000203705.10	7830	3265	1050	1.47e-59
TAX1BP1	ENSG00000106052.13	42499	18625	1148	6.04e-57
TAX1BP3	ENSG00000213977.7	26981	11990	1107	1.11e-19
TBC1D16	ENSG00000167291.15	5070	1810	1111	1.07e-31
TBC1D7	ENSG00000145979.17	15920	6430	1187	3.11e-73
TBCAP1	ENSG00000226781.1	1640	0.260	1067	3.67e-39
TBCB	ENSG00000105254.11	58351	26444	1113	4.16e-51
TBCC	ENSG00000124659.6	11020	4930	1019	3.37e-55
TBCE	ENSG00000116957.12	16950	7400	1096	1.89e-59
TBX15	ENSG00000092607.13	2270	7885	-1442	1.53e-16
TCEB1	ENSG00000154582.16	67911	26575	1321	1.04e-63
TCEB2	ENSG00000103363.14	295517	138164	1091	3.82e-66
TCF19	ENSG00000137310.11	4270	0.440	1872	9.63e-54
TDO2	ENSG00000151790.8	76478	213996	-1472	2.27e-18
TDRKH	ENSG00000182134.15	4090	1165	1233	1.59e-42
TEAD2	ENSG00000074219.13	7460	3145	1029	1.32e-15
TECRP1	ENSG00000235043.3	6040	1785	1338	2.72e-50
TENM1	ENSG00000009694.13	0.120	1300	-1038	2.21e-38
TESC	ENSG00000088992.17	7240	2130	1397	1.90e-18
[truncated: 208 more rows]

## Sheet: RCodeTCGA-LIHC0.01
BiocManager::install("DESeq2")
BiocManager::install("gplots")
BiocManager::install("biomaRt")
BiocManager::install("PCAtools")
BiocManager::install("DT")
BiocManager::install("IHW")
BiocManager::install("apeglm")
BiocManager::install("EnhancedVolcano")
BiocManager::install("ComplexHeatmap")
BiocManager::install("TCGAbiolinks")
knitr::opts_chunk$set(echo = TRUE)
getwd()
knitr::opts_chunk$set(root.dir = "/Users/Sena/OneDrive/Belgeler/210821_verda_HCC")
library(knitr)
library(DESeq2)
library(gplots)
library(biomaRt)
library(PCAtools)
library(DT)
library(IHW)
library(apeglm)
library(EnhancedVolcano)
library(ComplexHeatmap)
library(TCGAbiolinks)
mrna_query <- GDCquery(project = "TCGA-LIHC",
data.category = "Transcriptome Profiling",
data.type = "Gene Expression Quantification",
workflow.type = "HTSeq - Counts",
experimental.strategy = "RNA-Seq")
GDCdownload(mrna_query, method = "api", files.per.chunk = 100,
directory = "/Users/Sena/OneDrive/Belgeler/210821_verda_HCC")
mrna_df <- GDCprepare(mrna_query, directory = "/Users/Sena/OneDrive/Belgeler/210821_verda_HCC/")
mrna_meta <- mrna_df$sample
mrna_meta <- cbind(mrna_meta, mrna_df$definition)
mrna_df <- assay(mrna_df)
## tidy matrix colnames
delim_fn = function(x, n, i){
do.call(c, lapply(x, function(X)
paste(unlist(strsplit(X, "-"))[(n+1):(i)], collapse = "-")))
}
colnames(mrna_df) <- delim_fn(x = colnames(mrna_df), n = 0, i = 4)
mrna_meta <- as.data.frame(mrna_meta)
mrna_df <- as.data.frame(mrna_df)
## fix the levels that R thinks are there but are not
mrna_meta[,2] <- as.character(mrna_meta[,2])
## Rename conditions
mrna_meta[,2] <- gsub("Primary solid Tumor", "Tumor", mrna_meta[,2])
mrna_meta[,2] <- gsub("Solid Tissue Normal", "Normal", mrna_meta[,2])
mrna_meta[,2] <- as.factor(mrna_meta[,2])
levels(mrna_meta[,2])
colnames(mrna_meta) <- c("cases", "Condition")
## filter for protein coding genes in matrix (currently > 50,000 rows)
mart <- useMart(biomart = "ensembl", dataset = "hsapiens_gene_ensembl")
mrna_attributes <- getBM(attributes=c("external_gene_name",
"ensembl_gene_id",
"gene_biotype"),
filters = c("ensembl_gene_id"),
values = rownames(mrna_df),
mart = mart)
mrna_attributes <- mrna_attributes[which(mrna_attributes$gene_biotype == "protein_coding"),]
mrna_df <- mrna_df[which(rownames(mrna_df) %in% mrna_attributes$ensembl_gene_id),]
mrna_df$Gene_id <- mrna_attributes$external_gene_name
rownames(mrna_df) <- make.names(mrna_df$Gene_id, unique = T)
mrna_df <- mrna_df[,1:424]
## DESeq2 Analysis
mrna_dds <- DESeqDataSetFromMatrix(mrna_df, colData = mrna_meta, design = ~ Condition)
mrna_dds$Condition <- relevel(mrna_dds$Condition, ref = "Normal")
mrna_dds <- DESeq(mrna_dds)
resultsNames(mrna_dds)
## DESeq2 results
mrna_res <- results(mrna_dds, filterFun = ihw, alpha = 0.05, name = "Condition_Tumor_vs_Normal")
summary(mrna_res)
mrna_res2 <- results(mrna_dds, filterFun = ihw, alpha = 0.05, name = "Condition_Recurrent.Solid.Tumor_vs_Normal")
summary(mrna_res2)
mrna_res_df <- as.data.frame(mrna_res)
mrna_res_df2 <- as.data.frame(mrna_res2)
## Function to grab results
get_upregulated <- function(df){
key <- intersect(rownames(df)[which(df$log2FoldChange>=1)],
rownames(df)[which(df$pvalue<=0.01)])
results <- as.data.frame((df)[which(rownames(df) %in% key),])
return(results)
}
get_downregulated <- function(df){
key <- intersect(rownames(df)[which(df$log2FoldChange<=-1)],
rownames(df)[which(df$pvalue<=0.01)])
results <- as.data.frame((df)[which(rownames(df) %in% key),])
return(results)
}
mrna_upreg <- get_upregulated(mrna_res)
mrna_downreg <- get_downregulated(mrna_res)
mrna_counts <- counts(mrna_dds, normalized = T)
mrna_upreg2 <- get_upregulated(mrna_res2)
mrna_downreg2 <- get_downregulated(mrna_res2)
write.table(mrna_counts, "/Users/Sena/OneDrive/Belgeler/210821_verda_HCC/mRNA_norm.counts.txt", quote = F, sep = "\t")
mrna_upreg$Gene_id <- rownames(mrna_upreg)
mrna_downreg$Gene_id <- rownames(mrna_downreg)
mrna_upreg <- mrna_upreg[,c(8,1,2,3,4,5,6,7)]
mrna_downreg <- mrna_downreg[,c(8,1,2,3,4,5,6,7)]
write.table(mrna_upreg, "/Users/Sena/OneDrive/Belgeler/210821_verda_HCC/mRNA_upreg.txt", quote = F, sep = "\t", row.names = F)
write.table(mrna_downreg, "/Users/Sena/OneDrive/Belgeler/210821_verda_HCC/mRNA_downreg.txt", quote = F, sep = "\t", row.names = F)

## Sheet: mRNA_downreg
Gene_id	baseMean	log2FoldChange	lfcSE	stat	pvalue	padj	weight
A1BG	516837670575318	-122675726468182	0.223794721515581	-548161840625189	4.21453e+06	1.4099e+07	111379738450868
A1CF	924652009619791	-100879724958519	0.131923583085503	-764683027849054	2.05994	23.4071	0.6669467798541
AADAT	596512695860675	-279853079367518	0.213101679357348	-131323732507164	2.14817e-25	1.44341e-23	0.946377764541293
ABAT	157347255391366	-161006382061551	0.18428876678514	-873663570874434	0.000240155	0.00285508	0.95943424924746
ABCA8	140040311563789	-148380896393258	0.252245483656569	-588240051882469	404358	2.34808e+06	0.709370283899155
ABCC9	138091783858172	-155587950502079	0.217440579279864	-715542384118762	83.4148	449.071	121207511092582
ABHD6	170043141816269	-106974700101922	0.137331630048148	-778951652029596	0.672661	0.517245	105912715634988
ABLIM3	327339626998505	-104473665766749	0.148120771791156	-705327581698349	174.754	1086.58	0.995031561367341
ACAA1	108835420412494	-15297875360419	0.143038856337108	-10694908888509	1.07525e-12	2.34974e-11	111379738450868
ACAA2	163037453240692	-158653251545897	0.154707790550481	-10255026652593	1.12345e-10	3.3212e-09	0.6669467798541
ACACB	451831701721675	-120645930551792	0.152881861955485	-78914482731065	0.2987	2.26979	111281493908931
ACAD11	107357561081609	-171755271674923	0.186261958679364	-922116748329627	2.93883e-06	4.45023e-05	0.896246230775245
ACADL	580969495680095	-143110562051172	0.283624531593496	-504577517491629	4.51686e+06	1.54324e+08	0.946412670017622
ACADM	534103594340756	-128327003321363	0.144009726124594	-891099558166906	5.05763e-05	0.000910181	0.6669467798541
ACADS	537720606017407	-178011174328865	0.141316287305059	-125966495245231	2.20306e-22	1.72377e-20	0.6669467798541
ACADSB	125252012163841	-176923594440393	0.161132888041068	-109799803498402	4.77028e-14	1.91036e-12	0.6669467798541
ACAT1	154745707310323	-139875319905445	0.136057389888695	-102806117344948	8.61789e-11	1.81957e-09	0.95943424924746
ACOT12	192397579672306	-116872581429662	0.237338445486954	-492430045161336	8.46627e+07	2.25431e+07	118876714947973
ACOT2	164892583457892	-10857355487975	0.130212892057158	-833815708755555	0.00754573	0.0706707	105912715634988
ACOX2	53732728787193	-114350300762311	0.171846680764412	-665420479776829	2848.36	22675	0.6669467798541
ACSL1	310281617041729	-183595713547576	0.188119651015045	-975951808101601	1.67951e-08	2.55578e-07	111383846496267
ACSM2A	108163204661481	-118751165467434	0.233833262264027	-507845480654286	3.80517e+06	1.12693e+08	111281493908931
ACSM3	158572522304745	-205706263455472	0.208960530033608	-984426405419182	7.25684e-09	1.18648e-07	105912715634988
ACSM5	52855927937246	-185874046687304	0.248188379409905	-748923245839471	6.92775	45.3712	111281493908931
ACVR1C	8444708613643	-166835905804886	0.19981241550088	-834962659285558	0.00684791	0.0908211	0.740277061123834
ADAMTS1	140291108235274	-155810664779087	0.183046984010451	-851205856361947	0.00170872	0.0149252	121940613765583
ADAMTS13	505119632374296	-280819869698882	0.144919163633585	-193776904763893	1.19072e-69	9.0147e-67	115299650756476
ADAMTSL2	126265433138033	-151534511554017	0.244428916014841	-619953293679937	56631	238677	111379738450843
ADGRA1	104894064652441	-172793066832414	0.552833210121209	-312559129352104	0.00177447981528328	0.00373950931324864	0.928448540372894
ADGRA3	264119918550254	-118741619253519	0.163524939335799	-726137674998199	38.317	262.9	0.978648097738888
ADGRB3	1445043940519	-189649563924553	0.311611359130016	-608609276805675	115699	561324	0.916910653286286
ADGRE1	461955891417212	-204073453791698	0.246277834140099	-828631023592681	0.0116816	0.134124	0.843887822532013
ADGRG4	0.784531479576221	-200948349150935	0.589954989334282	-340616407664743	0.000658825718284083	0.000639158811835344	229346620018431
ADGRG6	304892080337817	-132802657255887	0.180930704690112	-733997347124379	21.3636	150.581	0.978648097738888
ADGRG7	266344867749562	-269203038031134	0.256296758952037	-105035677833723	8.31757e-12	1.89074e-10	0.972157883339661
ADH1A	244774681939125	-179321251261999	0.237801313131702	-754080155826077	4.67091	35.945	0.95943424924746
ADH1B	95042162155417	-181133873236067	0.268308421575298	-675095743072805	1468.73	12121.1	0.6669467798541
ADH1C	274065585378167	-154337077629164	0.29842676505806	-517169020007765	2.31986e+07	7.05199e+07	111281493908931
ADH4	429572414513165	-237087995010128	0.317849140915751	-745913593873676	8.70917	56.5871	111281493908931
ADH6	126079817990646	-153154265555919	0.204627226866163	-748454972984071	7.17928	76.8474	0.6669467798541
ADK	245556208699266	-111138234933084	0.115979377404917	-958258592344991	9.4645e-08	1.48961e-06	0.998495350515408
ADM	100903674685748	-133237363894776	0.18037622986987	-738663647593132	15.059	87.48	121940613765583
ADRA1A	502807874063565	-311484518947606	0.306056720326615	-101773461669196	2.50294e-10	5.11932e-09	0.945542994669583
ADRA1B	200917355288164	-15693504302731	0.218978530850053	-716668626911066	76.8348	57.2446	0.864675952044456
ADRA2B	124827595337038	-223562429013675	0.169065502774058	-13223420824794	6.4273e-26	4.62143e-25	0.896246230775245
ADRB1	291760007506639	-133729841522915	0.290478172866425	-460378279728473	4.14885e+08	1.28733e+09	0.916910653286286
ADRB2	368393456242942	-101544215030836	0.213046061185314	-476630332735933	1.87637e+08	6.44596e+08	0.864675952044456
AFM	928607614147244	-190224242942287	0.243982634704245	-779663041072069	0.635821	0.538577	0.95943424924746
AGBL4	169694799670179	-203525696011823	0.365083618763717	-557476932821644	2.47858e+06	1.0171e+07	0.922866740464942
AGL	186710852499278	-149891401305595	0.138547508917309	-108187727427894	2.80508e-13	6.49195e-12	111379738450843
AGTR1	194529672123125	-145332816601512	0.173171629041664	-839241493573674	0.00476257	0.00408154	118876714947973
AGXT	655162017854258	-12028189240022	0.223006631291732	-539364644465977	6.9042e+06	2.25031e+07	111379738450868
AGXT2	236725873793681	-179151285274298	0.238225641245827	-75202351995951	0.546778	36.2304	111383846496267
AHSP	24225261214091	-166186487007005	0.398470612336336	-417060836764375	3.03788e+09	3.69923e+09	22004558832929
AKAP3	310107915434473	-130732838248913	0.200498787633029	-652038048669859	7012.93	42797.1	0.843887822532013
AKR1D1	397739986053491	-191105269005988	0.299515692409038	-638047601008505	17653.8	87329	0.998495350515408
AKR7A3	387488664381303	-146414495310497	0.252026912005307	-580947860470608	626677	2.57319e+06	0.998495350515408
ALAS1	145045725734311	-125690050012705	0.17266269284529	-727951405954996	33.5025	204.875	111281493908931
ALAS2	848332368063314	-180112437029318	0.277285516777147	-649555876999063	8272.58	45813.9	0.92693109113931
ALB	311537853590658	-182188165724668	0.197048561503062	-92458510904601	2.33376e-06	2.89694e-05	111379738450868
ALDH1B1	705579007986827	-134141235363789	0.159297930463976	-842077702912306	0.00373995	0.0561167	0.6669467798541
ALDH2	439597566891853	-168040748193585	0.15298063762995	-109844455348699	4.54018e-14	1.12147e-12	111383846496267
ALDH4A1	149818314464456	-105808459229242	0.149958985777959	-705582654352644	171.578	960.185	111379738450868
ALDH6A1	11960622580612	-174954344623446	0.177791788323921	-984040636931412	7.54056e-09	1.17341e-07	111379738450868
ALDH8A1	49471361719376	-190334000043864	0.206307071142021	-922576230617121	2.81551e-06	5.6692e-05	0.6669467798541
ALDOB	214095595212721	-154808691088174	0.256609099879414	-603286053226181	161082	737302	0.95943424924746
ALKAL1	907033116648074	-102631401584404	0.516441068592058	-198728195385782	0.0468911603403616	0.0763924706759633	0.92693109113931
ALKAL2	394975982809548	-125955749143029	0.361446725658853	-348476663921728	0.000492566422132492	0.0013883511159379	0.745029512844227
ALLC	137845422605225	-119921938968234	0.349357976158922	-343263778565291	0.000597740073050003	0.00136162188579464	0.922866740464942
ALPL	269963949593992	-156306879303932	0.24699666698906	-632829913088889	24787.8	120725	0.998495350515408
AMBP	307100628127319	-102252548106776	0.172310079249274	-593421746146677	295250	113605	111281493908931
AMDHD1	377163966207057	-137240902976476	0.203519532760854	-674337745938818	1547.46	8873.72	0.978648097738888
AMHR2	100336074383856	-296091222881586	0.386449358292709	-766183761281645	1.83291	15.2506	0.92693109113931
AMN	194051504290813	-124927471329298	0.295779857825146	-422366391842513	2.40362e+09	5.3004e+09	118876714947973
AMOTL2	129603503249791	-103644779053886	0.149412667426475	-693681337995579	401.043	2029.02	118876714947973
AMPD1	411981244111509	-220315937212229	0.397512618420824	-554236336163278	2.98416e+06	5.12879e+06	229346620018431
ANG	236902325070324	-115488505094391	0.212988133832217	-542229761895411	5.88378e+06	3.13851e+06	0.6669467798541
ANGPTL1	389759769860537	-110250766058511	0.295394740203636	-373231987754785	0.00018972435784351	0.000496441718386896	0.864675952044456
ANGPTL3	175405013561004	-115450768309231	0.196073127914288	-588814844427328	390546	1.48321e+06	111281493908931
ANGPTL6	272598546585587	-296820075020437	0.188021250406404	-157865174483664	3.85271e-42	5.99264e-40	0.972157883339661
ANK3	408780260361765	-109591317313076	0.246844508427077	-443969031401206	9.00884e+07	2.59791e+09	0.947962011920702
ANKRD30B	129325344865641	-130078231279058	0.456448502463189	-284978985749984	0.00437481229570512	0.00343646601559504	250720538287654
ANKRD55	370139128928123	-222038729617512	0.231698901464969	-958307217745192	9.42004e-08	1.73859e-06	0.843887822532013
ANO1	343717939768305	-111684436822674	0.254913555626109	-438126707496425	1.17991e+09	3.25142e+09	0.978648097738888
ANTXR2	149862521509725	-126032565782143	0.123910482732519	-101712593642464	2.66441e-10	7.17718e-09	0.709370283899155
ANXA10	960750635700718	-18573184730137	0.265497376927296	-699561891913648	264.09	1361.87	118485111424296
ANXA8	194230618283705	-151189518719478	0.377083717450567	-400944171606395	6.08625e+09	0.000160081058705906	0.928448540372894
AOC1	176291285970536	-206055475481851	0.365909347890832	-563132580978302	1.7883e+06	7.94978e+06	0.864675952044456
AOX1	397921193334879	-145273553918896	0.242878209516179	-598133336902826	2213.18	864675	111383846496267
APCS	44071666542808	-115671456327011	0.233758514043207	-494833126401678	7.48524e+06	2.13314e+08	111383846496267
APOA1	403298662342976	-134002138259854	0.244924662638967	-547115740881434	4.47106e+06	2.42813e+07	0.6669467798541
APOA5	133596746974794	-15023013236353	0.247542954373794	-606885107045626	128829	595801	0.95943424924746
APOBEC3A	15100780716279	-180164961296715	0.237650268306184	-758109648185179	3.42647	27.7281	0.928448540372894
APOC3	208269355563319	-117711331374076	0.230502790536079	-510672044795271	3.27798e+07	1.58712e+08	0.6669467798541
APOF	548779913286343	-286061768213761	0.286995827381762	-996745391121111	2.11583e-09	3.45451e-10	111383846496267
APOH	21720084963976	-101228603166159	0.193241486860705	-523845085290241	1.6193e+07	5.0297e+07	111379738450868
APOL1	108615055631907	-101647453588904	0.144511296639094	-703387596353528	200.874	1115.35	111281493908931
APOL6	537169744986908	-111042300229427	0.130293155810423	-852249679108193	0.0015615	0.0244623	0.6669467798541
AQP3	315438521774413	-154520166841882	0.164854400693511	-937312963389786	7.04131e-07	1.03655e-05	0.978648097738888
AQP7	558723957196568	-124785265128735	0.158013396891306	-789713198904092	0.285394	2.53668	0.946377764541293
AR	437171632414201	-114799256024174	0.229077621268916	-501136930741089	5.40441e+07	1.56788e+08	111383846496267
ARG1	185411232648481	-107742554944858	0.24166177068084	-445840294231528	8.25726e+07	2.36719e+09	0.95943424924746
ARHGAP10	32110408191941	-147408484572085	0.176174899453798	-836716723148994	0.00590199	0.0655248	0.896246230775245
ARHGAP20	605095694701954	-134340698748139	0.230253117639397	-583447903443949	53958.9	2.61928e+06	0.843887822532013
ARHGEF26	124490852016081	-128405253550221	0.172716548309335	-743444995903039	10.5004	6.20514	121940613765583
ARID3C	191832286156746	-15865307287956	0.214756760257457	-738757060263722	14.9536	11.6429	0.896246230775245
ARL5B	223545891267468	-104129003294908	0.102796024549562	-101296722077714	4.08015e-10	7.00693e-09	111379738450843
ART4	103735808687362	-111056154789447	0.213356777966738	-520518522297711	1.93803e+07	5.46684e+07	121940613765583
ASCL1	163701617364722	-12569752377554	0.519057580278624	-242164893744672	0.0154502683596382	0.0285171139546405	0.896246230775245
ASPA	185852690580257	-192828779030536	0.218234914248615	-883583544340041	9.93529e-05	0.000973116	122009024194229
ASPDH	260528280635324	-159489978710094	0.257717819887986	-618855067062938	60719.9	282697	0.998495350515408
ASPG	193320421407887	-205802358773036	0.341019441312445	-603491572154907	159046	805900	0.862329573726731
ASS1	506994340617995	-175344762322348	0.199953907273388	-876925911143147	0.000179846	0.000187478	111379738450868
ASXL3	338390240916877	-109365589418231	0.330500219844541	-330909278879372	0.000935988115784356	0.0022484838604634	0.843887822532013
ATAD3C	171210750632056	-123312990133481	0.282366862211679	-436711975221224	1.25896e+09	2.80756e+09	122009024194229
ATF3	222158169396266	-173657708734228	0.173556420560871	-100058360372396	1.43673e-09	2.36826e-09	111379738450843
ATF5	331099758781089	-127765502158002	0.262381329708648	-48694585967635	1.11904e+07	5.06391e+08	0.6669467798541
ATOH8	865283046589393	-165536348744436	0.254431873882216	-650611679341198	7711.83	33548	119634206973591
ATP11C	135777071972095	-128191086612274	0.154517621337198	-829621149373813	0.0107484	0.145855	0.709370283899155
ATP13A4	144677544071839	-189978761424364	0.339917547340864	-558896599809414	22842.6	9.37868e+06	0.92693109113931
ATP13A5	0.396416332943688	-126461553336715	0.529525603954023	-238820469477611	0.0169309088013559	1	0.00845978674471172
AVPI1	126770581606267	-103430685797356	0.137903524354901	-750022062751437	6.37105	39.3732	118876714947973
AVPR1A	160768620069458	-248226904358591	0.36894332848994	-672804968108698	1719.52	11061.1	0.862329573726731
AXL	602584032132852	-135087428493966	0.157858379804489	-855750760024738	0.00115334	0.0130789	0.945542994669583
AZGP1	471489728012961	-156348075449408	0.211587373338798	-73892913826696	0.147613	1.52562	0.6669467798541
AZU1	376647438089893	-10267236500449	0.245063751838723	-418961858839325	2.79424e+09	3.28381e+08	229346620018431
BACH2	151302183838777	-170915750097511	0.199580355498833	-856375617080764	0.00109249	0.00130776	0.896246230775245
BBOX1	874086928149948	-175571061900224	0.316347114247277	-554994984917065	2.85752e+06	9.19995e+06	118485111424296
BCHE	264837855315916	-189289986597732	0.267672117668364	-707171102640788	15.3035	958.947	0.995031561367341
BCKDHB	15815571881953	-151682723385915	0.140424116954805	-108017573245438	3.37678e-14	1.45844e-11	0.572985601436948
BCO2	549833121210515	-310573345567501	0.269427252283267	-115271689458116	9.62572e-17	2.95255e-16	115299650756476
BDH2	122999764166198	-130326955068173	0.13950016287331	-93424231473143	9.41542e-07	1.86735e-06	0.709370283899155
BEND2	0.340878382601667	-153299234292972	0.482223447752527	-317900830014479	0.00147779859414088	0.233144649195384	0.00848142972677847
BEND4	738075121958232	-119789881765383	0.38279749550552	-312932772998396	0.00175206774030221	0.00370361127932993	0.926079317758803
BGN	11901140891381	-121623572636993	0.208043336823608	-584606911684527	50332.5	1.88617e+06	111379738450868
BHLHA9	220149960702684	-255912536701984	0.614424322352063	-416507822675918	3.11246e+09	4.54295e+09	181201088751161
BHLHE40	752733222743451	-138587936860569	0.148284284991046	-934609738779383	9.09415e-07	1.17031e-05	111281493908931
BHMT	196357484557673	-161726348083888	0.293933383109983	-550214291322511	375203	1.26032e+07	111379738450868
BLK	291027918643711	-133059888343353	0.287535822993298	-462759342325336	3.69939e+07	1.2496e+09	0.843887822532013
BLNK	107501582794715	-102653062144078	0.128797777873954	-797009574532703	0.158551	1.13293	121940613765583
BMP10	109364851876311	-496245328699556	0.661226715269	-750491952669627	6.14663	48.1455	0.92693109113931
BMP5	453359770561673	-248347547807187	0.365585104678064	-679315280161328	1097.09	6948.72	0.896246230775245
BMPER	965613496535492	-449681647250856	0.300682794745387	-149553501267553	1.43724e-36	1.38784e-34	122009024194229
BMPR1B	228626240045319	-144116164098836	0.350904946947603	-410698581916418	4.00856e+09	0.000108227244388528	0.928448540372894
BNC1	52907388692375	-115234634540341	0.309985651406311	-371741833912494	0.000201269012885813	0.000496575240551586	0.916910653286286
BRINP1	183773779572363	-123552678735034	0.368687036054785	-335115332660286	0.000804757310189599	0.00178677270711842	0.928448540372894
BRINP2	532999719667426	-19231924641945	0.316405009725109	-607826173759181	12149.2	581296	0.928448540372894
C10orf82	0.612088402855366	-110894106280058	0.474284359143534	-233813542745351	0.0193802239222749	0.0188492716159519	176514789994648
C11orf54	463502301710322	-115752036977933	0.127921083107333	-904870676249754	1.44672e-05	0.000194084	0.95943424924746
C11orf96	100897484245352	-188229881537769	0.230913347246905	-815153752617443	0.0359326	0.00461244	0.709370283899155
C14orf180	396682782485983	-27914300059535	0.49715644082138	-561479199855406	1.96799e+06	8.23372e+06	0.916910653286286
C1orf162	378382883098227	-119349501313363	0.161064170869482	-741005902610566	12.6243	98.2421	0.90593063721884
C1QB	608392971105671	-104180762473964	0.198932116433407	-523700065840493	1.63207e+07	5.83201e+07	0.95943424924746
C1QC	470229817086265	-105390728835275	0.185299068905504	-568760164083825	1.28836e+06	5.28113e+06	0.95943424924746
C1QTNF1	156977312243922	-161333063232709	0.244360836092113	-660224714454218	4049.72	18330.4	118876714947973
C1QTNF7	356606698560181	-121831770481597	0.246399721423566	-494447679476737	7.63486e+07	2.61285e+08	0.916910653286286
C1R	656162006508182	-176431265841467	0.160802822329927	-109719010702109	5.21639e-15	1.28234e-12	111281493908931
C1RL	717510329816555	-164538262413147	0.120526890433834	-136515811385239	1.97545e-28	1.3691e-26	111281493908931
C1S	102726036531838	-133090046132975	0.150543589055948	-8840631937074	9.51787e-05	0.00101893	111281493908931
C21orf62	570843024257852	-279437544038742	0.255268204002195	-109468214081351	6.88204e-14	1.97705e-12	0.928448540372894
C21orf91	349177549231995	-169384137636308	0.119918976546174	-141248818589682	2.66847e-31	2.6844e-29	0.896246230775245
C2CD4B	48985463917579	-149592003387882	0.265747117985661	-562911103314219	1.81141e+06	7.77978e+06	0.896246230775245
C3orf85	994033858656433	-173096591602583	0.352240802540734	-491415504263069	8.91662e+07	3.45779e+08	0.794886437342711
C5AR1	407116697827077	-109966839528089	0.157026252008703	-700308630699496	250.384	1609.28	0.945542994669583
C5orf52	0.401313035836392	-196169157235055	0.482511534609113	-40655848236659	4.79122e+09	0.0102489842470951	0.00845978674471172
C6	157100371389849	-19543909866697	0.233263762874556	-837845948545691	0.00536249	0.0485863	111379738450868
C7	487825288593215	-204090886251619	0.327947335833438	-622328233687117	4868.6	207218	111379738450868
C8A	132675237017277	-182794466472293	0.212986959615331	-858242527159559	0.000928935	0.0104811	0.95943424924746
C8B	178592133645068	-155782035210798	0.189986320428271	-819964484072492	0.0241098	0.205262	111281493908931
C9	223559879356616	-258995387400786	0.376421103559015	-688046937198837	596.557	5170.74	0.6669467798541
CA2	317823622165915	-133084993406607	0.199117421032898	-668374433117125	2329.13	13039.8	0.978648097738888
CACNG7	0.555339856029917	-10167818958553	0.51790478930121	-196326026879807	0.0496159395355939	0.0351660513791647	229346620018431
CALML3	216300973309842	-118782534992961	0.373277956563945	-318214705433893	0.00146187572390052	0.00315908802556547	0.916910653286286
CALN1	108888906848915	-264308539671974	0.459875777674699	-57473898931667	906316	3.96038e+06	0.916910653286286
CAMK2B	233099981843218	-159766043710192	0.330021007779969	-484108708063552	1.29131e+08	4.53212e+08	0.864675952044456
CAMK4	691733043767901	-171384555603148	0.180287597624818	-950617556953652	1.97801e-07	3.29054e-06	0.916910653286286
CAMP	210329993669192	-132102561129037	0.346838949830633	-380875796082143	0.000139666588899947	0.000149445616866714	229346620018431
CAND2	883914369865755	-136824370767227	0.248818766362674	-549895704280577	3.82044e+06	1.1811e+07	121585773816799
CARMIL3	869307180550668	-118686490523926	0.207933351890564	-570791022434874	1.14372e+06	5.63334e+06	0.794886437342711
CASS4	832858383014061	-106405956809111	0.161499879786844	-658860904104396	4439.66	26098.6	0.896246230775245
CAT	190444030607692	-14255177960826	0.140909467677098	-101165508576702	4.66568e-10	7.97192e-09	111281493908931
CBFA2T3	18752735009415	-194521951357678	0.192493254520123	-10105390541742	5.22868e-10	8.13226e-09	122009024194229
CBLN2	383913806979592	-153516299801684	0.563551809168773	-272408494310607	0.00644799202796169	0.00557770320422643	22004558832929
CBR4	151611871050535	-118496631514883	0.123149293017527	-962219340536674	6.44421e-08	8.74818e-07	118876714947973
CBSL	110470514038685	-176255027365393	0.361631060476919	-487389073087218	1.09422e+08	3.74356e+08	0.896246230775245
CCBE1	99155967745561	-350857576925778	0.313802840708923	-11180828578006	5.06152e-15	1.68931e-13	0.896246230775245
CCDC141	207641022019172	-12272877148886	0.280693364608534	-437234316742837	1.2292e+08	3.59613e+09	0.916910653286286
CCDC196	38538250946392	-19939126370349	0.385410999025884	-517347102722669	2.29785e+07	1.02882e+08	0.740277061123834
CCDC3	725543791676958	-121953936461068	0.185124542952923	-658766982031556	4467.83	2056.34	116063127897958
CCDC38	564842854076954	-101677876475917	0.201427250021112	-504787095416629	4.46761e+07	1.92744e+08	0.740277061123834
CCDC42	398880774391862	-144794549564649	0.202648996697581	-714509086767059	89.9364	263.219	229346620018431
CCDC71L	132373596691672	-174746996396271	0.165766841866136	-10541734066297	5.54666e-12	1.73996e-10	0.709370283899155
CCL14	174177977695109	-186984128549645	0.181421670097813	-103066038609849	6.57851e-11	1.10537e-09	121585773816799
CCL2	781916725795556	-136217058471582	0.228981509777506	-594882349251432	270077	975550	119634206973591
CCL23	241713709838032	-29816544897447	0.177952189011656	-167553684296033	5.17394e-50	1.40383e-47	0.745029512844227
CCL3	208384898298792	-159059124939179	0.193317214194172	-822788211604461	0.0190552	0.208476	0.864675952044456
CCL4	252457235561856	-134842266385017	0.201377215082842	-669600412983895	214.196	130.907	0.896246230775245
CCN1	30760669743189	-199219630832195	0.184611470907346	-107912921040632	3.78431e-14	9.6101e-12	0.995031561367341
CCN5	831892326574525	-101722782642351	0.322078267311002	-315832494665423	0.00158678576495371	0.00340966732948931	0.916910653286286
CCN6	156598454786016	-144168536425482	0.195695371987986	-736698752560856	1.74527	130.844	0.926079317758803
CCR1	251142516309113	-149422963177553	0.179190057526035	-833879765655204	0.00750497	0.0825514	0.896246230775245
CCR9	274360847395859	-134631645396698	0.354078632500217	-380230923413926	0.000143353640094223	0.000159171463936276	22004558832929
CD14	203326674294153	-14181043834812	0.187700575719319	-755514136302798	0.418405	2.81911	111379738450868
CD160	295308404855746	-166752402483409	0.179855981870818	-927144044634444	1.83649e-06	2.83506e-05	0.896246230775245
CD163	165768725003782	-197343850044707	0.191153292201975	-103238530590512	5.49718e-11	1.06263e-09	105912715634988
CD180	108032869511714	-100573756124266	0.181348108336235	-554589496670095	2.92454e+06	1.2244e+07	0.896246230775245
CD1D	336658406796736	-159339155936379	0.210749896195477	-75605805180842	4.01274	30.8555	0.972157883339661
CD200R1	395965207993175	-122688339243929	0.178344450416255	-687929111096952	601.511	3927.08	0.896246230775245
CD226	814167873154074	-142156759286308	0.193931780473796	-733024566365574	22.9731	185.914	0.843887822532013
CD244	565267219686111	-166862279974719	0.200887809855369	-830624218039178	0.00987805	0.129617	0.740277061123834
CD274	104799010290048	-100725597208263	0.191723518399991	-525369021228372	1.49082e+07	4.28358e+07	121585773816799
CD300A	274560710824442	-126273450516312	0.164069692853071	-769633003637014	1.4003	12.187	0.896246230775245
CD300E	514553818734732	-168933416716412	0.190984374500524	-884540513632172	9.11968e-05	0.00120623	0.896246230775245
CD302	142117197283272	-169068607690484	0.146468995560242	-115429621841673	8.01178e-17	3.92924e-15	0.709370283899155
CD4	280874630137521	-195467198137819	0.16067863511039	-121651019753515	4.76849e-20	2.12297e-18	0.998495350515408
CD5L	104491912829835	-300873921660347	0.345905675236947	-86981493279706	0.00033734	0.0032227	118876714947973
CD69	126979366938085	-137544581904029	0.213967843161738	-642828286118019	12905.3	53910.3	121585773816799
CD81	256012676678933	-103006699973536	0.133159503852301	-773558754678074	1.02927	12.0425	0.6669467798541
CDA	961181202509011	-134743170835976	0.229928255650754	-58602267239674	462236	1.62646e+06	119634206973591
CDC37L1	149532393768871	-158247367446466	0.113288145505097	-139685725051741	2.42437e-31	2.90409e-28	0.709370283899155
CDH19	893678872654226	-20208772862058	0.369890422387501	-54634485347358	466973	1.90916e+07	0.896246230775245
CDHR2	195012720788855	-189116350983532	0.348193957869212	-543135073741193	5.59291e+06	1.84489e+07	111379738450843
CDKL2	213876115674697	-10177153685519	0.35381000849319	-287644595721348	0.0040218105759283	0.0034514744276294	229346620018431
CDNF	118528232220663	-101227312126821	0.137207961000712	-737765588735017	16.1101	140.509	0.794886437342711
CEACAM3	64034255132711	-153950213469597	0.262703469061684	-58602276558993	462233	206713	0.926079317758803
CEACAM4	114443696627137	-115095816373307	0.194644649207253	-591312511502723	335677	1.53486e+06	0.922866740464942
CELA1	0.595622344103696	-153202444987883	0.366907743812786	-417550317678915	2.97328e+09	3.48357e+09	229346620018431
CES3	187457447835336	-113761990423163	0.219668602482722	-517880066324505	2.23317e+07	1.27354e+08	0.572985601436948
CES5A	122165084199774	-144808468972511	0.276780283395911	-523189250317279	1.67783e+06	4.7721e+07	122009024194229
CETP	465629834765133	-277928897189591	0.211545365438357	-131380281772506	1.99354e-26	1.34391e-23	0.946412670017622
CFAP251	513223777005418	-157989356295371	0.179971734972563	-877856494073672	0.000165574	0.00226572	0.843887822532013
CFAP74	284961790489145	-142967901447699	0.277668598052931	-514886819936497	2.62063e+07	1.1639e+08	0.740277061123834
CFHR3	677398807761201	-157088309112819	0.304982498363581	-5150731925789	2.59472e+07	1.27169e+08	0.6669467798541
CFI	202020151278934	-136528131013683	0.153201369050443	-891167826109502	5.02658e-05	0.000553435	111379738450868
CFL2	348971156346896	-106364021235611	0.115026714880111	-924689724004294	2.31104e-06	3.23925e-05	0.978648097738888
CFP	414042989967205	-338055314463643	0.214378937253703	-157690544973444	5.08046e-42	6.61085e-40	115299650756476
CFTR	228258137840948	-176539283491345	0.45293961963925	-389763394140597	9.71371e+09	0.000265848932296192	0.864675952044456
CHRM2	141251272744881	-377724350087426	0.476140187612575	-793304912953015	0.21383	1.96631	0.92693109113931
CHST4	196878925854692	-189831478059441	0.504379357239601	-376366469671485	0.000167441361896443	0.000321384272169052	121585773816799
CHST7	313775041086245	-103695145325106	0.177139289284435	-585387610755293	480246	2.21249e+06	0.896246230775245
CILP	665562739398982	-13894088634206	0.266131621665993	-522075826511279	1.78192e+07	6.74465e+07	0.896246230775245
CISH	181587743175218	-12143087135709	0.1650463518701	-735737991062429	18.7555	221.886	0.572985601436948
CITED2	18066366762102	-112843969989285	0.137579503516175	-820209167101825	0.023624	0.256887	0.862329573726731
CLC	111962194540573	-147852066455513	0.556315628369162	-265770111274674	0.00786756331315298	0.00644534563243721	229346620018431
CLDN34	103328615441565	-131742394988083	0.269963861393703	-488000113452059	1.06085e+08	1.37629e+08	250720538287654
CLDN8	158121699158135	-119715687758233	0.547766892053839	-218552251870065	0.0288505566935908	0.0271476242524241	176514789994648
CLEC12A	454615995981735	-166476751265347	0.204796732091581	-812887732949283	0.0433285	0.529944	0.740277061123834
CLEC12B	200500893820122	-103889196184514	0.270749297797441	-383709937679092	0.000124496101517631	0.000167376745850775	181201088751161
CLEC17A	434204006945465	-103095610275248	0.315039442796379	-327246675400839	0.00106613410250145	0.00103937147410262	22004558832929
CLEC1B	149818071472939	-519653878197939	0.453272810864606	-11464483766558	1.98942e-16	5.62114e-15	121585773816799
CLEC4C	114513911530429	-188431762617839	0.348571941322332	-540582130343049	6.45121e+06	1.10503e+07	22004558832929
CLEC4D	28058416406166	-166985448020083	0.300295235535092	-556070920414484	2.68681e+06	579471	181201088751161
CLEC4G	529936328523821	-538223506356498	0.381328201078455	-141144427512657	3.09452e-32	2.93421e-29	0.946412670017622
CLEC4M	215897067127061	-557203272267025	0.521176177318163	-106912651904822	1.11835e-12	2.98128e-11	0.900484214151191
CLEC9A	152447400664084	-122951834797407	0.242136105560506	-507779847672008	3.81833e+07	1.33975e+08	0.928448540372894
CLIC6	111507088196954	-130970260641528	0.381141782484617	-343626090500361	0.00058980268681082	0.00103736593396954	122009024194229
CLRN3	632338336997486	-154229366441848	0.346855785875688	-444649830627659	8.72814e+08	2.52549e+09	0.946377764541293
CLSTN2	107165748697072	-137478172386333	0.272579116865147	-504360620018983	4.56839e+07	1.22683e+08	122009024194229
CLTRN	345523753444169	-244457836553019	0.267768140427995	-912945939581472	6.88422e-06	1.01451e-05	0.896246230775245
CMBL	842574115791075	-10753742862642	0.186201654744398	-577532078187156	768066	4.57407e+06	0.6669467798541
CMPK2	375951085963152	-101318510394871	0.204353814820915	-495799456857024	7.12246e+07	2.48887e+08	0.900484214151191
CMTM5	152900839383019	-18871263800687	0.357998772431945	-527132081277581	1.35445e+07	1.97496e+07	250720538287654
CMTM6	404774621234005	-102599815482622	0.100939972898178	-101644385803549	2.85764e-10	5.64138e-09	0.978648097738888
CNDP1	76181656650617	-327136691509907	0.381145908076359	-858297792467364	0.000924481	0.000842704	119634206973591
CNGA1	656340421398462	-126069968527467	0.245164392903675	-51422625869247	2.71449e+06	9.56313e+07	0.945542994669583
CNTN3	931135680310437	-12894327007673	0.399572916784697	-322702727487931	0.00125083536363835	0.0020972885337414	121585773816799
CNTN4	860391405241852	-134122888692464	0.219636523662393	-610658402600776	101786	609111	0.740277061123834
COBLL1	391116621116713	-10955874025978	0.15113105312767	-724925407402733	4.19073	253.087	111379738450843
COL25A1	1978360261052	-265982281122487	0.29990477983302	-886889102836508	7.38779e-05	0.00095208	0.928448540372894
COL6A6	204327465142388	-334810557899242	0.266196162367373	-125775877053094	2.80464e-22	1.58906e-20	0.926079317758803
COLEC10	255009441064823	-393646058335219	0.303938863595136	-129514881275459	2.30443e-24	1.3921e-22	0.972157883339661
COLEC11	217217386125388	-141175720195295	0.237161170708169	-59527333152278	263701	1.06966e+06	105912715634988
COX6A2	921217033856742	-116530458105704	0.379399240987265	-30714467905226	0.00213024128231466	0.00458467192963527	0.896246230775245
CP	413134891572359	-153241950337441	0.199144519064448	-769501219804342	1.41481	9.99753	111379738450868
CPB1	110483474628305	-100690425084728	0.314739097611429	-319917118174617	0.00137823307237428	0.00295988362724133	0.92693109113931
CPB2	264650651571926	-105039165573392	0.169242994484419	-620641143188133	54208.1	3709.28	0.6669467798541
CPEB3	725416667548311	-227414926163506	0.167094744288888	-136099389080922	3.49536e-28	2.31937e-26	114845450627745
CPED1	775516620837911	-201551153172592	0.214700416686218	-938755295790399	6.14104e-07	7.56909e-06	118485111424296
CPN2	120930524825984	-110292213113467	0.197337533668291	-55890134564497	2.28363e+06	7.8843e+06	111379738450868
CPS1	807427204971182	-117024194981435	0.287962842810458	-406386441525939	4.82669e+09	0.000108569156326555	111383846496267
CPT2	31458163923884	-119116635718525	0.127359409456242	-935279428721365	8.53622e-07	1.24818e-05	0.978648097738888
CR1	56704472761388	-204697151460358	0.256020953174033	-799532807462102	0.129229	1.32589	0.843887822532013
CR1L	673908370158255	-103830816577533	0.362494287312643	-286434352792934	0.00417874551457093	0.00829655349517577	0.92693109113931
CRHBP	637413749219756	-445442242161932	0.320093989353555	-139159827106258	5.06588e-30	3.68454e-28	115299650756476
CRISPLD2	895631423495444	-105985947193333	0.226589821161184	-467743637601181	2.90484e+08	7.45793e+08	114845450627745
CRP	113278230755432	-113591498675728	0.384038774626417	-29578132777407	0.00309829739586596	0.00531752789839402	111281493908931
CRYBG1	733355465521731	-10076408353113	0.163619294933646	-615844748457043	73461.5	293459	116063127897958
CSDC2	274273932369824	-109247751784819	0.342936519947679	-318565522859703	0.00144426600217388	0.00378830077282656	0.745029512844227
CSF1R	137832887361542	-102701666437393	0.170322419704273	-602983838626243	164124	600268	121207511092582
CSF3	242195938125219	-288238029527072	0.396520445146944	-726918455415977	36.1664	141.895	176514789994648
CSRNP1	196163872078445	-224594090218608	0.137501686389455	-163339153224984	5.66305e-46	9.59644e-44	105912715634988
CTBS	122319686896523	-106139637924286	0.103141699167521	-102906621454719	7.76406e-11	2.19632e-09	0.709370283899155
CTNNA3	120711599238546	-219245198730666	0.331373555784727	-661625512667933	3684.12	21873.3	0.896246230775245
CWH43	122844296045185	-280944982424652	0.451530584523906	-622205874981602	49067.3	247538	0.928448540372894
CXCL12	330134231712256	-266669038485099	0.223198106196683	-119476389396472	6.6796e-19	2.48745e-17	111379738450843
CXCL14	414248647855421	-354796755487268	0.390853178130565	-907749444904725	1.11103e-05	0.000152739	0.946412670017622
CXCL2	205799162816956	-155169957886356	0.232715623034462	-666779289946415	2596.79	12036.1	118876714947973
CXCR1	213797505405429	-224276376073418	0.264380045631789	-848310527889744	0.00219262	0.0246479	0.928448540372894
CXCR2	205229304917485	-22527829088758	0.257243582159147	-875739207939533	0.00019982	0.00250303	0.916910653286286
CYP1A2	696801426861475	-32445245559249	0.475536473569506	-68228721375894	892.381	46.6241	111281493908931
CYP26A1	258687258594349	-387011523039668	0.358533833745829	-107942817835716	3.66315e-13	9.53385e-12	0.972157883339661
CYP2A6	407171145971596	-148037101136317	0.381808618817211	-387725928227902	0.000105639761322198	0.000261047099528657	0.95943424924746
CYP2B6	878935386960153	-264424681628789	0.288713294861182	-91587289652154	5.25122e-06	6.31805e-05	111383846496267
CYP2C18	256097790215923	-12060998044517	0.227824694162993	-52939818876211	1.19681e+07	4.27389e+07	0.978648097738888
CYP2C19	124516839755851	-371401993925559	0.340175109454173	-109179650010693	9.45914e-14	2.06212e-12	122009024194229
CYP2C8	216403687490685	-267354652295264	0.275942987295054	-968876415074078	3.36577e-08	5.73842e-07	0.95943424924746
CYP2C9	233549389079569	-181664680751265	0.262566580612466	-691880437820806	455.471	2438.76	111281493908931
CYP2E1	160873087408487	-155032750762916	0.364670687336694	-425130826651215	2.12525e+08	5.02546e+08	111281493908931
CYP2J2	392493547076498	-112417984512411	0.176216411752762	-637954112186425	17761.9	88101.6	0.995031561367341
CYP39A1	107987932032974	-243842910944971	0.293959145510124	-829512926096642	0.0108467	0.0875109	121940613765583
CYP3A4	691763612494843	-1675066587592	0.428528761064929	-390887786254841	9.27258e+09	0.000230644546078005	0.95943424924746
CYP3A43	225841788804103	-14230326675894	0.300080495469556	-474216981467819	2.11441e+08	6.97549e+08	0.896246230775245
CYP4A11	206855535383646	-223664578858568	0.240659432985873	-929382140078828	1.48846e-06	1.88042e-05	111281493908931
CYP4A22	554166113003231	-216729774961965	0.251449397819437	-861922028214979	0.000674116	0.00666052	111383846496267
CYP4F2	57401493053075	-160978881728353	0.245146767516834	-656663285259508	5146.57	24437.8	111383846496267
CYP4V2	482433158741143	-142826300086729	0.148026278426418	-964871248571764	4.97767e-08	7.25483e-07	111379738450868
CYP8B1	189701016912575	-150342216471642	0.325752906727795	-461522256184411	3.92674e+08	1.65012e+09	0.6669467798541
DACH1	365440489906477	-261555949382567	0.214991859406052	-121658536330238	4.7248e-20	2.32733e-18	0.896246230775245
DAO	282353852413039	-103124763411433	0.235452371543632	-43798566451187	1.18757e+09	2.89455e+09	111379738450843
DBH	448900492843977	-321018312877596	0.239765123201591	-133888660949111	7.0245e-27	5.15105e-25	0.945542994669583
DBT	172336496369539	-111203966279898	0.106079334327584	-104830942788997	1.03307e-11	2.1432e-11	105912715634988
DCN	466867572725352	-230771607609972	0.295728761341939	-78034887970582	0.602188	4.43317	111383846496267
DCUN1D3	469417902327761	-118894941432676	0.08884841806655	-13381773589218	7.7281e-27	4.68062e-25	115299650756476
DCXR	348861893350246	-101712289406656	0.220901812539274	-460441171747164	4.13633e+08	1.23021e+08	0.95943424924746
DEFA3	173134537634629	-31320834787294	0.439608840254714	-712470540154432	104.304	379.09	181201088751161
DEPDC7	128041127535876	-122948372601994	0.172437967047584	-713000592079969	100.365	535.23	121207511092582
DGAT2	8474062351393	-105794212018808	0.188093395200329	-562455751868008	1.85984e+06	6.50102e+06	111281493908931
DHODH	307041316647165	-176130780424676	0.172696600096902	-101988562789219	2.00621e-10	3.54052e-09	111379738450843
DHRS1	350012699877373	-101251492741385	0.162524393984004	-622992587508745	46665.6	199004	111383846496267
DHRS7C	0.505877759466849	-310513378125698	0.682345818761198	-455067459326469	5.34742e+07	6.3433e+08	250720538287654
DHTKD1	75634503493567	-105013963619605	0.142233433651395	-738321229571011	15.4515	112.628	0.95943424924746
DIRAS3	101399431630064	-284783326128619	0.284651772199284	-100046215742245	1.45447e-09	2.20045e-08	121585773816799
DLC1	166974091130385	-126272946073322	0.129187141612587	-977442061935209	1.44984e-08	2.83725e-07	0.862329573726731
DLG2	728205819323399	-114911719477185	0.190638396191798	-602773217634367	166276	857828	0.843887822532013
DLGAP2	101087391527907	-163839555090062	0.387389404347482	-422932463436972	2.34394e+09	6.55791e+09	0.92693109113931
DMD	172001928464539	-130557383462854	0.155267682479104	-840853559338882	0.00415161	0.0718349	0.572985601436948
DMGDH	497797378867799	-161369718736677	0.201352168152946	-801430251369837	0.110764	0.876818	111383846496267
DNAH6	182935681568453	-105883935971632	0.27700816905129	-38224120369543	0.000132152626816732	0.00025781859345091	121585773816799
DNAJC12	84815469141696	-14114687558499	0.239456253670586	-589447439444044	375876	1.37443e+06	116063127897958
DNAJC25	103461070278986	-12492021146046	0.120103596308137	-104010383785649	2.45246e-12	4.30579e-10	121940613765583
DNASE1L3	135335544509967	-288729419805601	0.235335910896103	-122688211376746	1.33178e-20	5.17172e-19	118876714947973
DNMT3L	311684731844671	-117194239329113	0.337848433173278	-346884069369075	0.000522709304141537	0.00120942896058977	0.916910653286286
DPEP3	549046650612395	-100828126238325	0.279779704662078	-36038398982552	0.000313550240864673	0.000742173710255461	0.928448540372894
DPF3	990296999047273	-179301966632883	0.214850488800486	-834542977462741	0.000709554	0.0877748	0.794886437342711
DPPA4	921146379782869	-191082663340341	0.314871206577603	-606859755190879	129032	616952	0.926079317758803
DPT	369610844101318	-199108231697627	0.347486363682477	-572995813670449	100455	4.1333e+06	0.972157883339661
DPYD	238109245162066	-101335062041162	0.151194816563912	-670228413540393	2051.87	10254.5	111379738450843
DPYS	125698881417228	-121656367922099	0.223997761090942	-543114213863536	5.59945e+06	2.12511e+07	0.95943424924746
DSCAM	514470932406613	-20729572730383	0.311233940011764	-66604473566088	2729.95	15991.7	0.926079317758803
DSE	360557317694524	-140188066298707	0.16283557730624	-860917918662575	0.000735856	0.00889126	0.900484214151191
DTX1	105159565030516	-183081186709423	0.247952746123255	-738371280705296	1.53935	91.4921	118876714947973
DUSP1	124281201916079	-166841371601428	0.176605221817615	-944713694670532	3.48225e-07	4.71259e-07	111383846496267
DUSP10	18611257439831	-114006121960583	0.141529063883369	-805531520045476	0.0792743	0.812813	0.862329573726731
DUSP5	107126131718603	-154381268010953	0.198093261634624	-779336292093084	0.652489	7.37233	0.709370283899155
DUSP6	364292384844788	-173429041779603	0.138617606342061	-125113285646875	6.47324e-22	2.97619e-20	111383846496267
DYNLT5	686159787189873	-208315188649224	0.289429113409024	-719745108553856	6.13485	44.7269	0.896246230775245
ECHS1	28319764666178	-120465992002157	0.131114514785198	-918784561720827	4.00788e-06	5.62169e-05	0.95943424924746
ECM1	706315447856815	-305642439855006	0.1912311987242	-159828752784117	1.68205e-43	2.33878e-41	116063127897958
ECRG4	177485772158289	-127599034432714	0.270627343553907	-471493503786682	2.41788e+08	7.70621e+08	0.922866740464942
EDNRB	113867472909962	-145142621420222	0.153557845470671	-945198345127493	3.3247e-07	4.50467e-06	111379738450843
EFHD1	108639671836522	-135021927240334	0.253102744740087	-53346686294923	9.57192e+06	3.06193e+07	111379738450843
EFNB3	43985396012407	-190423094500041	0.246030352974951	-773982121301222	0.0995567	9.33115	0.843887822532013
EGR1	771637223150852	-259411446273336	0.214230224233067	-121090031624629	9.46373e-21	3.68336e-18	111379738450868
EGR2	203440045741991	-253971951216395	0.222778853420976	-114001821679401	4.17245e-16	1.54537e-14	0.896246230775245
EGR3	784191700539686	-21196680354931	0.219811453236468	-964311915636542	5.2566e-09	9.22845e-07	0.916910653286286
EHD3	352600338450243	-214712808275815	0.159195360038758	-134873785406523	1.85583e-27	1.49297e-25	0.900484214151191
EHHADH	112845927843022	-130097040198739	0.188898540358783	-688713845811831	569.258	3018.17	111379738450868
EIF4E3	499304315428782	-114548781245279	0.181476955662597	-631202903018985	27540.1	140484	0.946377764541293
ENO3	201210782012161	-158695595471953	0.266795429142824	-59482126804728	271086	1.96829e+06	0.572985601436948
ENPEP	22278015647737	-105848934651975	0.179767540875434	-588810049559062	39066	148266	111379738450843
EPB41L4B	277178401151046	-157656591563159	0.164553476526099	-958087272851713	9.62283e-08	1.3622e-06	111379738450843
EPHA2	146328547266116	-208042835699454	0.167122151507023	-124485493887812	1.4241e-21	6.41102e-20	111379738450843
EPHB1	502521850366861	-204412876488299	0.212475298658511	-962054778973766	6.54815e-08	1.16342e-06	0.896246230775245
EPHX2	645969633665266	-152302955695643	0.167854871881521	-907349033057231	1.15264e-05	0.000155992	0.95943424924746
EPM2A	254360170817656	-102116130951612	0.106289565881889	-960735234021797	7.44384e-08	1.3106e-06	0.896246230775245
ERICH3	141334645676528	-119372621490491	0.26045100474699	-458330431884696	4.57685e+08	1.39504e+09	0.928448540372894
ERLIN1	348411480961465	-129472216559174	0.107528440204489	-120407416226771	2.16996e-19	9.31578e-18	0.998495350515408
ERN2	758284377743444	-138746767312708	0.499471505736837	-277787152458326	0.00547162479415234	0.0106930345264787	0.922866740464942
ERRFI1	150076520214593	-13522428141495	0.175511790414541	-770456965287424	1.31285	9.33115	111281493908931
ERVFRD.1	502548057466975	-208073632618279	0.315706155947424	-659073726306849	4376.48	24882.6	0.928448540372894
ESR1	596096761205782	-24684828029839	0.281557873895331	-876723058329938	0.000183115	0.00184507	115299650756476
ETFDH	301764232604452	-167194004084122	0.13766467740934	-121450184049012	6.09689e-20	2.67109e-18	0.998495350515408
ETFRF1	126595747556121	-103113825810353	0.107741423493668	-957049038955872	1.064e-07	1.50003e-06	111379738450843
ETS2	97963931872231	-168538475907334	0.129258828052908	-130388367623407	7.35709e-25	4.06557e-23	111383846496267
EVA1A	264656065774943	-104448293703725	0.171490381558649	-609062110390159	112473	453929	111383846496267
EXPH5	333944576705806	-147041502611571	0.276185051793115	-53240210379567	1.01498e+07	3.68091e+07	0.972157883339661
EYA2	700648477471127	-131590618546498	0.303731879505581	-433245989063458	1.47453e+09	4.35912e+09	0.896246230775245
F11	323387402328618	-122015565228552	0.185505372211658	-657746801474489	4785.27	22792	111379738450843
F8	690114255128233	-129720274803186	0.154013995937745	-84226289963687	0.00368129	0.0338881	111379738450843
F9	125930577648452	-187226476348186	0.283810225195738	-659688974275186	4198.73	20153.5	111383846496267
FABP1	656973448346438	-103219114080018	0.272230350786947	-379160934045884	0.00014967422541789	0.000506964466487547	0.6669467798541
FAH	927739626193224	-100145236733379	0.129419500580513	-773803300771339	1.00967	7.27514	111281493908931
FAHD2A	160609442129648	-114636321149965	0.106610471035486	-107528200594675	5.7477e-13	1.20586e-11	118876714947973
FAM110C	786515466098437	-119535872014554	0.227089009272431	-526383343683317	1.41082e+07	4.29087e+07	114845450627745
FAM13A	110199902021449	-187624826093093	0.201729693059707	-930080362723601	1.39388e-06	1.61648e-05	121940613765583
FAM149A	855019226564495	-136318354811347	0.155414548004808	-877127376821438	0.000176656	0.00173529	118485111424296
FAM151A	269733160661118	-132034655497209	0.394673696980917	-334541309712851	0.000821601013554832	0.00187538401928616	0.900484214151191
FAM160A1	235315243992045	-117947153753785	0.248901926368951	-473869991584358	2.15094e+08	6.93927e+08	0.916910653286286
FAM163B	511555342221471	-231309012425404	0.382457827948097	-604796125278405	146690	762313	0.843887822532013
FAM167B	268329948866411	-101122157078167	0.143553342862999	-70442216852222	18.6501	1277.96	0.896246230775245
FAM180A	11892221228609	-24602861664684	0.339564075298341	-724542537165273	4.31084	23.9409	121585773816799
FAM83E	908416842258852	-11511597690224	0.383530708212207	-300148004937708	0.00268670644051863	0.00557770320422643	0.916910653286286
FAM83F	935814893137051	-173389093601429	0.387843287603532	-447059673696543	7.80017e+07	2.47306e+09	0.864675952044456
FANCC	815554480567243	-104777331837926	0.144878340804963	-72320908188049	47.5614	277.302	114845450627745
FAT4	314586650675337	-123572248705478	0.201593320428877	-612977892534264	88001.3	438210	0.90593063721884
FAXDC2	407971593510866	-116378918393151	0.168396886705091	-691098990428264	481.283	2569.02	111383846496267
FBP1	163839172263769	-201758167508097	0.227205715700443	-887997763991567	6.68738e-05	0.000729488	111281493908931
FBXO15	199510924265007	-108410588777968	0.181344208183706	-597816659620833	225663	10514.6	0.922866740464942
FCAR	564660932267432	-20366127810578	0.276828165487985	-735695653463482	18.8151	14.0803	0.926079317758803
FCGR2B	330323371410867	-169118845325727	0.293062773088907	-577073790516619	789252	3.51558e+06	0.90593063721884
FCGR3A	155868170893672	-116161825613148	0.195702596005769	-593563028717944	292719	2.113e+06	0.572985601436948
FCN1	177036856698879	-128486021876487	0.208621644597593	-615880591509674	73295.5	373132	0.896246230775245
FCN2	474303047676711	-488645830365263	0.369340425141849	-132302287294328	5.87084e-26	4.03822e-25	0.946412670017622
FCN3	130640812932799	-407594118636915	0.303416417047548	-134334892819277	3.84842e-28	2.30257e-25	118876714947973
FCRL6	384242980177905	-118915825478501	0.195395256475699	-608591158369754	115830	689814	0.740277061123834
FERMT2	267213592860211	-107364688683235	0.0991849791335039	-10824692369872	2.62961e-13	6.8031e-12	0.995031561367341
FETUB	510622550234004	-120670089498421	0.284777539426918	-423734574507723	2.26178e+09	5.32712e+09	111281493908931
FEZ1	230667220852757	-14423611737947	0.171734313724296	-839879429168873	0.00451086	0.0524249	0.864675952044456
FGA	580299452667052	-137191306541772	0.196821219491801	-697035141312528	316.15	1719.51	111383846496267
FGB	383793741937191	-157649142611946	0.212290676596685	-742609826956516	11.1848	82.8551	0.95943424924746
FGF23	892992309797054	-358604602860076	0.661336211657761	-542242503190877	5.87959e+06	2.32654e+07	0.916910653286286
FGG	325612837938945	-138167320549699	0.20320811175964	-679930143306125	1051.28	5433.26	111383846496267
FGL1	780010501270032	-128752337340636	0.243455177511441	-528854381560997	1.23294e+07	389119	111281493908931
FGL2	8386501388478	-127190382755732	0.171736329097079	-740614309298731	13.0026	78.2274	118485111424296
FHL1	946242191707827	-106641964406432	0.174071219051461	-612634098776003	89923	345327	119634206973591
FHL2	60674142643005	-119434106305183	0.194784763446982	-613159387785955	87003	416655	0.945542994669583
FITM1	127369599163351	-205802980585208	0.224584968571307	-916370235703747	5.01466e-06	7.745e-05	0.864675952044456
FLT3	247232851169932	-112064461883608	0.239300809281313	-468299552434316	2.82713e+08	1.08944e+09	0.745029512844227
FMO3	181781122194194	-113771828604623	0.228238042108246	-498478814284014	6.20297e+07	1.78609e+08	111379738450868
FNDC4	252939896842971	-107307369614413	0.193454962702469	-554689154082083	2.90793e+06	9.90484e+06	111379738450843
FNIP2	220471819114531	-126155120332842	0.167022822406351	-755316659815019	0.424801	2.688	118876714947973
FOLH1	632717564551324	-131452207069505	0.197301795507869	-66624942125406	26.9219	12811.5	115299650756476
FOLR3	264071875967747	-136965320120372	0.384077899789974	-356608178172368	0.000362358335147934	0.000335975353241377	250720538287654
FOS	598943884275712	-309277480361961	0.241289892647374	-128176724258378	1.30561e-24	7.59683e-23	0.95943424924746
FOSB	197789701771102	-322213576966116	0.298222497791203	-108044691246503	3.27848e-13	7.93659e-12	105912715634988
FOSL1	956933583173437	-166219941082642	0.241700068370704	-68771160142042	610.764	4474.14	0.794886437342711
FOXD3	124420752956579	-177408666175449	0.550745867353885	-322124371132965	0.00127635561237899	0.00118275508345848	229346620018431
FOXF1	101024132596965	-134480665893085	0.198233261349981	-678396072269928	1169.25	7383.94	0.896246230775245
FOXO1	15825097965238	-172538155036875	0.151376793106269	-113979264256015	4.28196e-16	1.35026e-14	105912715634988
FOXP2	142189922511813	-123242180695208	0.340232899401108	-362228875902783	0.000292007895128254	0.000742173710255461	0.864675952044456
FPR1	138072374400385	-191636546198037	0.234740338569544	-816376713801419	0.0324735	0.250565	121585773816799
FPR2	169362392919533	-277078805077072	0.280839655044238	-986608550823876	5.83993e-09	1.09494e-07	0.92693109113931
FREM1	41421639895575	-107709900223651	0.357497537041914	-301288509887055	0.00258776875663849	0.00652221978731892	0.745029512844227
FREM2	201044299008196	-225729104754565	0.472526407061187	-477706856974313	1.77869e+08	6.6356e+07	0.794886437342711
FRMD4B	948140699541705	-136153697389128	0.112032279559626	-121530774812687	5.52462e-20	2.1335e-18	114845450627745
FRMD6	487032111883449	-110759729963651	0.162511549658908	-68154989719883	939.371	5685.68	0.947962011920702
FTCD	177372932848793	-138580126253434	0.224112593639866	-618350463946364	62693.9	42495.3	0.6669467798541
FXN	635594206023928	-118494407133356	0.110087279092348	-107636784295446	5.10893e-13	1.33937e-11	0.946412670017622
FXYD1	117455140097355	-182656290012221	0.301066295966546	-606697901622696	130339	49103.6	118876714947973
G0S2	498386432604857	-149011505419537	0.267978982687777	-556056687449816	2.689e+06	9.20458e+06	111379738450868
G6PC1	277931073414773	-104562289598822	0.247665005238456	-422192426815195	2.42226e+09	5.68878e+09	111281493908931
GABARAPL1	469791826357482	-106544996651775	0.160533262573512	-663694208563074	3202.57	1561.61	111379738450868
GABRA4	0.617752067362454	-117893647025296	0.528020528610309	-223274741487	0.0255656057667252	0.0191065528803636	229346620018431
GABRP	764900388323418	-175178774679175	0.40183018587463	-43595225256131	1.30347e+08	4.65117e+09	0.740277061123834
GADD45B	757724585490776	-193567352708864	0.184161996583695	-105107110207124	7.711e-12	1.54956e-10	111379738450868
GADD45G	387859147628142	-136751643834876	0.217622818959712	-628388348651035	3302.18	161794	0.978648097738888
GAREM1	565655243997721	-131520749296653	0.152196503230317	-864150926632161	0.000554752	0.00646217	0.946377764541293
GAS1	818729286450961	-113369261413241	0.253618446451205	-447007159769241	7.81934e+08	2.53659e+09	0.843887822532013
GASK1A	230187852528787	-1835634752518	0.300706106851243	-610441461179262	10317.8	514143	0.896246230775245
GATA3	744034814000811	-129335917079147	0.221038930840868	-58512731936918	487824	2.67822e+06	0.745029512844227
GATD3A	113667953619035	-111786006296892	0.325844873676788	-343065106519904	0.000602134597107463	0.00106103388056971	121585773816799
GATM	487919029972926	-119983807029999	0.177348320155938	-676543239453861	1329.12	6783.8	111383846496267
GBP1	258946920501674	-103911022335513	0.167117758754	-621783245001937	50406.9	213804	111379738450843
GBP7	141396293876794	-12428102646076	0.272328893592515	-456363718227861	5.02749e+08	1.20805e+09	118876714947973
GC	134436811742199	-123181006456157	0.157864174508369	-780297409718042	0.60465	0.445159	111281493908931
GCDH	36120677734664	-129555199726611	0.153308183334379	-845063824440731	0.00289715	0.0305813	0.978648097738888
GCGR	210026640088995	-143453951262695	0.353375717387271	-405953052811156	4.91715e+09	0.000140498370785587	0.862329573726731
GCH1	213604963369791	-151145579691824	0.173390296947384	-871707254401266	0.000285487	0.00553721	0.572985601436948
GCKR	256611926315887	-110964620235191	0.183593608997149	-604403502068062	150307	598517	111379738450843
GDF2	138960224766003	-475522055378799	0.649675250696604	-731938079631213	24.9118	141.453	122009024194229
GDF6	173404323706127	-11059138575125	0.300710947266815	-367766410755657	0.000235379637146081	0.000575446298336886	0.916910653286286
GGT5	142380954936585	-137972888197033	0.221050109484744	-624170187106626	43283.5	170890	121207511092582
GHR	366398818840962	-246588681870324	0.214027779368928	-115213400147123	1.02997e-16	3.24642e-15	111383846496267
GIPC2	68728214508896	-129807821451375	0.188451731247873	-688812040047737	565.344	2911.44	114845450627745
GJB2	14509655715118	-108689273108527	0.178631747739614	-608454401212937	116823	443011	118876714947973
GJB3	470928588399457	-154395096607918	0.363684183406637	-424530688031841	2.18294e+09	6.3294e+09	0.896246230775245
GJC3	362537280659818	-108501721766644	0.215287621849111	-503984952013123	4.65898e+07	1.63805e+08	0.916910653286286
GLOD5	872946470922719	-148345074958183	0.230776925765456	-642807223755766	12923.2	80822.6	0.794886437342711
GLP2R	246004635453533	-22704962895499	0.339930807197096	-667928955386923	2401.03	15461	0.843887822532013
GLS2	495256424432311	-199047057201041	0.348087085418044	-571831204142463	1.07587e+06	4.51893e+06	0.946412670017622
GLUD1	252735644011771	-106390169276753	0.155072157554692	-686068801481859	685.297	5888.5	0.6669467798541
GLYAT	471002034405855	-196283524840235	0.320343375341984	-612728528038676	89391.1	594851	0.6669467798541
GLYATL1	531841177209253	-205420973532965	0.240116160480687	-855506656118998	0.00117801	0.0114401	111281493908931
GLYATL3	463316945464618	-144429237209129	0.406515003476351	-355286363292939	0.000381061947837612	0.000900186581116588	0.916910653286286
GNA14	116094269738935	-175814621327549	0.183911646955758	-955973285203861	1.18061e-07	2.10778e-06	0.864675952044456
GNAO1	579610201629344	-224298237099394	0.288898737734441	-776390505747282	0.823536	6.97756	0.947962011920702
GNE	418235047303429	-157388879304493	0.146636193561272	-107332900208384	7.10216e-13	1.78445e-11	0.978648097738888
GNG5P2	294007469327874	-110557471567689	0.291651738815491	-379073589674812	0.000150201601079947	0.000166372864098232	22004558832929
GNMT	472490540984259	-15408087219077	0.294811622375911	-522641783756758	1.72826e+07	8.67711e+07	0.6669467798541
GNPNAT1	20216392813948	-108876839408209	0.104272981971792	-104415196870137	1.60225e-11	3.99127e-10	0.862329573726731
GOLGA6A	564665038299898	-101652930673636	0.394950364446651	-257381534046836	0.0100583940701139	0.0187248024260618	0.922866740464942
GOLGA6B	603325963302555	-121734586638082	0.416935396331108	-291974698500788	0.003503156763458	0.00703955415968935	0.92693109113931
GOT2	135290655264997	-100464400469123	0.133898828087854	-750300819684593	6.23697	41.034	111281493908931
GP5	709104976316801	-114250182257342	0.321961165377474	-354857027938115	0.000387328620453088	0.000908470351931017	0.922866740464942
GP6	470907465968918	-136329045365934	0.246298353995266	-553511800442461	3.11019e+06	1.25426e+07	0.928448540372894
GPAT3	781557768007856	-106797511917344	0.211188646268508	-505697222859036	4.25965e+07	1.25182e+08	111379738450843
GPD1	440789618212264	-161392419860212	0.240872734583792	-670031915978721	2079.65	10384	111383846496267
GPHN	141390522640123	-122060028397763	0.145068179671531	-841397670213662	0.000396339	0.0341295	118876714947973
GPM6A	115619183648957	-313615934714688	0.294222188257104	-106591530901346	1.5803e-12	3.11613e-11	121585773816799
GPR142	0.797574477424908	-103443443492159	0.348730223714404	-296628845043484	0.00301417645285565	0.00263535143576102	229346620018431
GPR146	882504495692345	-122043825278441	0.170082939280338	-717554775304554	7.20183	388.337	122009024194229
GPR15	234292861992465	-141170723024744	0.357867279821952	-3944778720619	7.98737e+09	9.19388e+09	22004558832929
GPR180	529265520462679	-101372471304547	0.164131774179423	-617628559804209	65627.2	319512	0.947962011920702
GPR182	697328583078091	-337107147022345	0.286642688032639	-117605353667336	6.23378e-18	2.82588e-16	0.843887822532013
GPR65	933536960737173	-116523669971043	0.170290659512688	-684263425278244	777.5	5196.47	0.864675952044456
GPR82	137652303298755	-131778152185431	0.21175964121074	-622300601908781	48771.9	249083	0.916910653286286
GPR83	698233388524606	-183742437894238	0.230001175660362	-79887608124911	0.136302	1.27993	0.922866740464942
GRAMD1C	534768928639768	-158720166787727	0.180201439651196	-880793000849222	0.000127478	0.00157564	0.947962011920702
GRAPL	152117763054901	-164146388329827	0.254568283042002	-64480298318524	11331.3	32598.1	181201088751161
GREM2	103328494104078	-103072531834159	0.361650161931654	-285006181895856	0.00437107325011899	0.00686560305519794	118876714947973
GRHPR	16898056157013	-119733509593872	0.146355644767509	-818099703527474	0.0281505	0.237693	111379738450868
GRIK3	370394786364692	-113704493933502	0.403016976792457	-282133261081099	0.00478245886720523	0.00505639600988913	181201088751161
GRIN2B	527321927770307	-226995829415791	0.336831967904634	-673914150215275	1593.25	11807.9	0.745029512844227
GRM8	610693322429385	-147019429168822	0.397417058548025	-369937389466778	0.000216131997894528	0.000648636994919034	0.740277061123834
GSPT2	37413111769649	-109698012438747	0.247670663224428	-442918878685862	9.45882e+07	2.85401e+09	0.900484214151191
GSTA2	8859692026114	-116599457690744	0.350018018151603	-333124158311878	0.000864595332599633	0.00161293329981335	111383846496267
GSTM1	300709424362694	-14260521705003	0.462351780204315	-308434450035019	0.00204001221603208	0.00398005986675367	0.998495350515408
GSTM5	591126115907751	-176073245883489	0.30652252884978	-574421875430172	923463	4.93128e+06	0.740277061123834
GSTZ1	25418297862032	-201562054144255	0.18328648043805	-109971042961012	3.946e-14	1.09422e-13	0.995031561367341
GYS2	280154604005955	-217916940865667	0.287457881789478	-758083025969209	3.43351	26.0276	0.995031561367341
H3C14	188524529020955	-132016642325278	0.55149889388721	-239377891394787	0.0166757971296798	0.0128871546602159	229346620018431
HAAO	758961268883479	-136544620361352	0.178069313745643	-766806012159929	1.74617	19.9125	0.6669467798541
HABP2	179937924679915	-11088978819771	0.214405060765248	-517197624915783	2.31631e+07	1.14283e+08	0.6669467798541
HAMP	639353906703646	-358675492459092	0.41550496005145	-863227944173466	0.000601412	0.00688664	0.95943424924746
HAND2	135086650959069	-153806966210483	0.352161968388768	-436750643217352	1.25673e+09	4.19943e+09	0.794886437342711
HAO1	993840248765342	-145190077750125	0.204433222939319	-710207840304022	122.894	1136.72	0.6669467798541
HAO2	356376385160635	-235656710499167	0.333206810387981	-70723857722107	152.292	858.389	111379738450843
HAS2	682414780749252	-106254583744573	0.355906211434525	-298546584270898	0.00283146758378566	0.0071182196752711	0.740277061123834
HBA1	113755591825933	-140308376909172	0.347113022263246	-404215249529774	5.29628e+09	0.000141313764081418	0.922866740464942
HBA2	516416864330688	-146311007180051	0.287628968479782	-508679664476619	3.64162e+07	1.2572e+08	0.947962011920702
HBB	113265281022999	-20631272711133	0.25894012669209	-796758423450759	0.161806	1.94598	0.709370283899155
HBD	447870977931682	-194978331103145	0.447652883935876	-435556964112119	1.32721e+09	3.86452e+09	0.916910653286286
HBM	127331483739875	-124293707653569	0.580543657448314	-214098812481876	0.0322749957146472	0.0245895245302857	22004558832929
HEMGN	173640809107965	-171369246019045	0.381711078032419	-448950150732829	7.139e+08	9.40439e+08	22004558832929
HERC5	511075134978856	-138520061094248	0.203654880359867	-68017059473103	1033.87	6245.76	0.946377764541293
HGF	567420845527068	-204812021427708	0.274863944198068	-745139643634453	9.23574	69.8914	0.947962011920702
HGFAC	50697770044983	-176009388986676	0.353489993435315	-497919013990092	6.38509e+07	1.83662e+07	111383846496267
HHIP	199157563056771	-330986819345834	0.412485664210628	-802420176175678	0.102188	1.03349	0.864675952044456
HIVEP1	810137894117142	-115787098581039	0.116377159183501	-99492975591945	2.53969e-09	3.83878e-08	119634206973591
HK3	181444322517158	-13850641149639	0.198498822575503	-697769436106886	300.064	2083.23	0.864675952044456
HMGCL	816277382853245	-127839240433175	0.134020303335616	-953879652943611	1.44499e-07	2.00592e-06	111383846496267
HMGCLL1	839015107940404	-282995384784305	0.290038410030553	-97571692230175	1.71886e-08	3.11285e-07	0.92693109113931
HMGCS2	641760125519668	-118871032371215	0.2002241688761	-593689728060617	290467	1.11815e+06	111379738450868
HMGN5	252060378737478	-101096186060178	0.211531913638504	-477924036715072	1.75959e+08	5.8709e+07	0.896246230775245
HMOX1	364444300247882	-136194687798348	0.199762529717366	-681782954946771	924.262	5435.06	0.978648097738888
HOGA1	120431563106069	-180834001723203	0.218597612954159	-827246003647462	0.00131223	0.176475	0.709370283899155
HP	507933623226346	-200537281556396	0.261287452232429	-76749679268183	1.6546	18.9207	0.6669467798541
HPGD	450204229584587	-107062038351895	0.332556424385078	-321936461007666	0.00128475013535779	0.00258440756898837	0.998495350515408
HPS5	164442338540901	-152186323880349	0.148026792845429	-102809985243188	8.58337e-11	2.01045e-09	0.862329573726731
HPX	13625193401653	-172797353333655	0.21537678583719	-802302591070695	0.103172	1.33876	0.6669467798541
HRG	11845982404349	-117616584598667	0.279605335397433	-420652146825046	2.59331e+09	9.80071e+09	0.6669467798541
HS3ST3A1	174619731644446	-154531281602754	0.243923060919228	-633524690205183	23696.2	124708	0.922866740464942
HS3ST3B1	168985695168154	-154486135151807	0.19155663517076	-806477598722136	0.0733703	0.622284	105912715634988
HSD17B13	926648543213125	-224722327070305	0.385833047389188	-582434108718606	573384	2.1307e+06	111281493908931
HSD17B6	228823402032746	-138106189357978	0.225025614311622	-613735417545509	83907.2	346023	111379738450868
ID1	152058449942782	-179086456233177	0.208529952488556	-858804474350059	0.000884618	0.00907743	105912715634988
ID2	807721978721373	-144972550200952	0.131871047608415	-109935086457674	4.10646e-14	1.02169e-13	111379738450868
IDNK	780280896280303	-117203516681538	0.14213772913169	-824577101361659	0.0164099	0.138028	114845450627745
IDO2	100433331410778	-183335844796035	0.362543051575087	-505693996890914	4.26037e+07	1.72149e+07	0.794886437342711
IER2	337380052809581	-132561955466548	0.122807519717283	-107942865202165	3.66296e-14	8.39847e-12	111379738450843
IFIT1	234605563556054	-110167936452831	0.220811831933804	-498922251982665	6.06228e+07	1.83446e+08	105912715634988
IFNL1	0.756166764947939	-122138020385656	0.378943124186619	-322312274824405	0.00126801203314133	0.00108071310779243	250720538287654
IGF1	456848199796896	-129884405869828	0.254831753102661	-509686898467095	3.45317e+06	1.19822e+08	0.946377764541293
IGFALS	241089429271653	-317229209384905	0.321526470269136	-986634814605983	5.82467e-09	9.14615e-08	111383846496267
IGFBP1	381224545076213	-138339850961784	0.252421306571776	-548051402001783	4.24092e+06	1.41791e+07	111379738450868
IGFBP3	107520946516213	-196422956251114	0.187395766369264	-104817179201403	1.04822e-12	2.07026e-10	111379738450868
IGFBP4	464351205832178	-104189026239775	0.136513122625031	-76321619662864	2.30849	26.0976	0.6669467798541
IGLON5	440849918892994	-112400512650247	0.288682250847915	-38935719920468	9.87789e+09	0.000261270138047499	0.896246230775245
IGSF10	320171960585085	-113759973862845	0.29224653880038	-389260294851767	9.91744e+09	0.000313367387763402	0.740277061123834
IL10	141603674253056	-156040742786736	0.227435416171183	-686088144993605	684.369	4351.43	0.916910653286286
IL13RA2	953508408608537	-164927216335817	0.363244005780918	-454039746591962	5.61483e+08	1.31131e+09	121585773816799
IL18R1	226082054650832	-148007514272776	0.181297915465865	-816377363702469	0.0324717	0.309877	0.972157883339661
IL1B	694222671441845	-179689401422978	0.225662690322171	-796274302882953	0.168267	1.94005	0.740277061123834
IL1RAP	190059182052064	-204987412297421	0.166720764478266	-122952538598839	9.60545e-21	7.64687e-19	0.572985601436948
IL1RAPL2	202379059756481	-205855207253009	0.314521067276971	-654503715872648	5948.06	33414	0.92693109113931
IL1RL1	812569467339894	-335095418271745	0.313671004623409	-106830218073251	1.22227e-12	3.45524e-11	0.843887822532013
IL1RN	330371967770285	-213151933270315	0.200367594486959	-106380442314582	1.98247e-12	4.20955e-11	111379738450843
IL2RB	376958496863331	-113951134124064	0.196233728228499	-580690868755125	636368	2.98867e+06	0.864675952044456
IL33	526015129695226	-159806280326739	0.217589494503188	-734439319745733	20.6695	124.779	115299650756476
IL5RA	352772302709708	-133071994399407	0.249844697683495	-532618845359622	1.00295e+07	2.0717e+07	176514789994648
IL6	400825045642554	-195132618116518	0.31790069162669	-613816274252281	83481.3	445741	0.843887822532013
IL6ST	101932933524481	-100404181742202	0.0974299544494854	-103052682626736	6.67053e-12	1.22171e-09	111379738450868
INHBA	633440654698134	-10114957337854	0.21145872810362	-478341917052363	1.72338e+07	5.46748e+08	0.946412670017622
INHBC	240856891712113	-138502394572479	0.22334772433053	-620120016837562	56034.2	267142	0.978648097738888
INMT	616854240370388	-244503107209774	0.250783596216959	-974956539813908	1.8526e-08	3.27454e-07	0.946412670017622
INMT.MINDY4	0.939863427597488	-192480945118921	0.378207626722134	-508929306336635	3.59401e+07	6.89858e+07	176514789994648
INS.IGF2	784582771178691	-413548560022083	0.612610571848827	-675059457060976	1472.41	9195.41	0.896246230775245
INSYN2B	152904484216288	-120909386911937	0.402876157628624	-300115518435303	0.00268957458342492	0.00237110496510431	229346620018431
IRF8	864471717094559	-156288803837555	0.160531306251806	-973572118029137	2.12306e-08	3.10595e-07	114845450627745
ITGA9	65788584556092	-182502320940935	0.173245452583749	-10534321000588	6.00148e-12	1.16963e-10	116063127897958
ITGAD	806554523188838	-106225083948226	0.273015782204153	-389080378762845	9.99127e+09	0.000313648254900052	0.745029512844227
ITIH1	842130186833622	-10846269063318	0.187135046086573	-579595820779621	679322	4.07762e+06	0.6669467798541
ITLN1	419234536758927	-263059831452728	0.375206319492414	-70110714501984	236.5	1913.39	0.745029512844227
IVD	834267073206088	-121633901284426	0.116002684779184	-104854384634253	1.00777e-11	2.30006e-10	0.95943424924746
IYD	114615306503281	-161125275422568	0.240454884368826	-670085267119897	2072.07	9724.97	118876714947973
JCHAIN	105746083869852	-183209352590956	0.327151650498429	-560013535960552	2.14184e+06	6.98155e+06	118876714947973
JDP2	530130913318839	-118972476915717	0.125843248135039	-945402146550213	3.26057e-09	4.2829e-06	115299650756476
JUN	786869774455455	-15497398484988	0.148021605504912	-104696867947927	1.19036e-11	2.33751e-10	111383846496267
JUNB	539069003254301	-154223025449724	0.150460454951686	-102500703922001	1.18257e-11	2.4631e-09	0.95943424924746
KANK4	969760099065598	-112826193704983	0.386558905957432	-291873222854701	0.00351457981012227	0.00814721076303307	0.794886437342711
KAZN	126466771089306	-17373609428273	0.213496790201659	-813764432330002	0.0403043	0.461483	0.794886437342711
KBTBD11	361229556370813	-233566334299544	0.267873754482885	-87192690732405	0.000280003	0.00353338	0.896246230775245
KCNA3	136046622169866	-14368243328895	0.251349252997612	-571644560607924	1.08775e+06	4.65329e+06	0.92693109113931
KCND3	813180193539684	-188810252015336	0.295491624059046	-638969895057356	16621.3	74495	111379738450843
KCNE1	114006842963268	-143294686931257	0.254081173404939	-563972076368217	1.70326e+06	7.11306e+06	0.92693109113931
KCNE1B	137592815936735	-194216546255711	0.381788215755437	-50870230730254	3.63728e+06	6.97548e+07	176514789994648
KCNH7	946967444410065	-108622976662793	0.375275770226883	-289448414421004	0.00379782089723221	0.00762020312862156	0.922866740464942
KCNJ10	749810236227393	-10780227017574	0.318727831469005	-338226723655991	0.00071890172335023	0.00175854497961348	0.843887822532013
KCNJ13	323229307953817	-187418143116055	0.513509158555476	-364975268685121	0.000262492912233201	0.000281120356451042	22004558832929
KCNJ15	826627099667716	-141503805732099	0.224898305871675	-629190180795935	31360	177480	0.843887822532013
KCNK17	379040332665695	-167538688735026	0.285130579051641	-587585832751676	420658	2.06532e+06	0.843887822532013
KCNN2	191695442646314	-346052228125789	0.30478708834823	-113539005212193	7.09265e-16	1.89553e-14	121585773816799
KDM6B	117233772377006	-103058210597518	0.102452565110905	-100591147216233	8.3748e-10	1.2855e-08	121940613765583
KDM8	133115321543083	-241584707804121	0.220262597980046	-109680313416627	5.44449e-14	1.23231e-12	121207511092582
KHK	104616865904525	-101429225804988	0.176059372224911	-576108073788966	835770	3.51558e+06	0.95943424924746
KIAA0040	988519817520989	-109467989188108	0.140707848553874	-777980690580991	0.726353	5.15307	114845450627745
KIF19	257017419595569	-239965914673504	0.220887786503625	-108637022658365	1.71646e-13	4.88451e-12	0.916910653286286
KIR2DL1	223975480383479	-157751056444796	0.28856688828991	-546670677913369	4.58474e+06	7.70102e+06	229346620018431
KIR2DL3	273206689970379	-10050976955264	0.293178124815981	-342828338968766	0.000607411041101475	0.000592229449268972	229346620018431
KIR3DL1	29945767359052	-146830167226915	0.286540127512657	-51242444994176	2.98733e+07	4.71537e+07	22004558832929
KIR3DL2	15721510431827	-102470041470902	0.316395251695358	-323867191185176	0.00120087625687741	0.00116010474591282	22004558832929
KLF10	268797629537901	-144681868185243	0.142679686364758	-101403270410454	3.65873e-10	6.30811e-09	111383846496267
KLF11	153027870587272	-123870402288333	0.124137294035036	-99785002767478	1.89306e-10	3.09678e-08	111379738450843
KLF4	569672579298125	-114601286133042	0.202102850168666	-567044383774898	1.42428e+06	5.88008e+06	0.946412670017622
KLF6	662589525631819	-133627614527707	0.139767839202983	-956068400926205	1.16981e-07	2.68394e-06	0.6669467798541
KLF9	521357471074333	-100047430448529	0.162238458749691	-616669014360441	69734.2	290423	111379738450868
KLHL15	610024500048556	-135951864809257	0.115431198352636	-117777400520379	5.08379e-18	2.08169e-17	0.945542994669583
KLHL33	156599578608254	-133764358908932	0.261354912715016	-511811151814045	3.0861e+07	4.85985e+07	22004558832929
KLK10	154320887662754	-174989815729416	0.41421883120841	-422457412713261	2.39393e+09	6.68874e+09	0.92693109113931
KLK12	0.47946065553888	-163679138761564	0.757111022341581	-216189084469197	0.0306265908601881	1	0.00843043967012994
KLKB1	510558241364816	-16221336257612	0.187713262039123	-864155045914187	0.000554552	0.00055363	111383846496267
KLRC3	0.574166395282085	-111849646374263	0.399903817148659	-279691369719245	0.00515933126407198	0.00452668555000733	22004558832929
KLRD1	917319860705672	-127010610227901	0.197567342099325	-642872495414994	12867.9	80539	0.794886437342711
KLRF1	187624907113223	-180096548097222	0.186161718452289	-967419884144324	3.8812e-08	6.80863e-07	0.92693109113931
KMO	130949896334277	-180499708400386	0.235307759693002	-767079286445451	1.70936	11.2618	118876714947973
KRTAP1.1	155702102342303	-221546434735424	0.559065969901497	-39627959250401	7.40771e+09	8.24174e+09	229346620018431
LARP1B	132762757790599	-111819430030689	0.101035652712228	-110673239622825	1.80717e-14	4.67152e-13	111379738450843
LCAT	363267031851038	-255141532911014	0.220614200492638	-115650548487484	6.19517e-17	2.23071e-15	0.995031561367341
LDHD	45971199269406	-131285596452122	0.178825425641779	-734155089976478	21.1133	21.4742	0.6669467798541
LDLR	51942453129985	-152013664619669	0.141048264828116	-107774218140802	4.40047e-13	9.9701e-12	111379738450868
LEAP2	556641669095946	-115219559496274	0.204470635908817	-563501741871905	1.75041e+06	6.13465e+06	111281493908931
LECT2	447454591297277	-112557006807228	0.29907679663136	-376348175702727	0.000167563955978272	0.000393455249282849	0.978648097738888
LGI1	104637118797138	-251428753562451	0.416498388300261	-60367281272933	157270	743367	0.928448540372894
LHX2	537232763403396	-214984035366876	0.227508941984857	-944947629272455	3.4053e-07	5.65189e-06	0.896246230775245
LIFR	872737936611628	-2814360621959	0.208292640259531	-135115701565467	1.3364e-27	8.82842e-27	111379738450843
LILRA1	337169325336666	-172385355057448	0.165015229661334	-104466330417647	1.5182e-11	4.38092e-10	0.740277061123834
LILRA2	592346925416883	-195543042430865	0.169423194510818	-115416925643188	8.13094e-17	3.11898e-16	0.916910653286286
LILRA4	134469660273511	-10005630631166	0.239225206646345	-418251520039762	2.88302e+09	7.94567e+09	0.928448540372894
LILRA5	757165793283732	-213831779356553	0.194647385886818	-109855972831246	4.48264e-14	1.62282e-12	0.745029512844227
LILRB1	177437082575372	-114273377611374	0.183211005385059	-6237255091265	44531.6	175095	121585773816799
LILRB5	355736135727782	-191794687866609	0.179592917277181	-106794126836637	1.27073e-12	3.12993e-11	0.972157883339661
LIPG	206088491119765	-111246389872143	0.197019594199282	-564646325276759	1.63782e+06	1.07865e+07	0.572985601436948
LIPJ	346897404350484	-117329692951847	0.247296760343923	-474448968877203	2.09033e+08	2.84695e+07	229346620018431
LIPN	10956315296444	-155296504671587	0.476275261523374	-326064604268692	0.00111158706793916	0.00107985934065208	22004558832929
LPA	176525553260955	-232517376640029	0.254597570391496	-913274138015088	6.67863e-06	0.000102222	0.862329573726731
LPIN2	903601248217006	-106095234826152	0.145361920155431	-729869519559919	29.0572	178.604	111383846496267
LRAT	140451179693821	-290466867371533	0.207993033825639	-139652209513436	2.54116e-30	2.41999e-28	0.896246230775245
LRCOL1	351764567601488	-137034950277906	0.341823855158682	-400893466649049	6.09933e+09	0.000164162168770613	0.90593063721884
LRG1	324464299594815	-163794814434482	0.205948438626014	-795319525252242	0.181762	1.41101	111281493908931
LRRC19	342837752965218	-219238394610017	0.334664221720848	-655099590516997	5715.46	32502.3	0.916910653286286
LRRC4	391990599639452	-188644394984942	0.164715957225148	-114527091462721	2.27909e-16	1.03609e-14	0.745029512844227
LRRC4C	210409800814785	-17051907383114	0.269503780559334	-632714960351357	24973.1	131849	0.916910653286286
LRRC55	242992641457262	-27565634395038	0.266245783721553	-103534538687256	4.03655e-11	9.8244e-11	0.843887822532013
LRRK2	31304282411787	-123377918932478	0.177187105408484	-696314320661451	332.763	2299.56	0.864675952044456
LRRN1	23541827974543	-100854028043499	0.404144328830121	-249549531810681	0.0125781415137447	0.0281357812330899	0.740277061123834
LRRN3	202173298481755	-258831570622461	0.254772201032115	-101593333014317	3.01128e-11	6.24497e-09	0.92693109113931
LTK	71510160128433	-138892022408732	0.242969186963112	-571644594710764	1.08775e+06	5.71156e+06	0.745029512844227
LY6E	862596451434661	-198469719993067	0.256767698011986	-7729543923543	1.07933	7.74083	111383846496267
LYPD2	113212476252113	-177417106081953	0.49068184444482	-361572591467472	0.000299507142637622	0.000713152494229856	0.926079317758803
LYVE1	420395879011702	-296921270294882	0.249652151504475	-11893399215891	1.28085e-18	5.41707e-17	0.947962011920702
MAFF	132585210806399	-12335370457963	0.161019324123571	-766080128897854	1.84777	19.8187	0.709370283899155
MAG	692638053915306	-2914599743209	0.383965922994177	-759077712022169	3.17993	26.1301	0.916910653286286
MAN1A1	776757405364858	-117472860198135	0.130171639662492	-902445882242229	1.80586e-05	0.000208454	111281493908931
MAN1C1	107316592556482	-167927738265749	0.20816720036264	-806696434275947	0.0720676	0.893318	0.709370283899155
MAP2K1	19937743184429	-127365314274964	0.0752278234984585	-169306126844909	2.6758e-50	5.4514e-48	105912715634988
MAP2K3	299264049782101	-124980226322455	0.108831057959039	-114838749770763	1.58992e-16	5.48006e-16	0.998495350515408
MARCO	778777912988995	-483458007574716	0.359788208206627	-134372944011846	3.6556e-28	2.2724e-25	114845450627745
MASP1	61229331793253	-161499258972704	0.163911778914715	-985281595026392	6.66499e-09	1.20186e-07	0.95943424924746
MAT1A	497647668758042	-181513551214569	0.186311886693471	-974245682526975	1.98692e-08	3.00247e-08	111379738450868
MBL2	514036606138366	-182399066239835	0.262676327692767	-694387148784771	381.498	2057.58	111383846496267
MBNL2	271348432671242	-136633174997725	0.133301144561686	-102499626276275	1.18389e-10	2.37185e-09	0.998495350515408
MCC	788562075837454	-172480454134922	0.192996081594989	-893699253940712	3.99905e-05	0.000434507	114845450627745
MCL1	163579992239952	-124910729705502	0.0945169188296531	-132157005594551	7.12201e-27	4.76769e-24	0.95943424924746
MEFV	204143130537707	-106924880507599	0.172471397726861	-619957175026398	56617	286841	0.916910653286286
MEGF10	13197172265141	-190966446499982	0.311719108227137	-612623485246313	89983	438029	0.92693109113931
MEP1B	360807824001274	-188185200442028	0.412853664840111	-455815744096416	5.16043e+08	1.58106e+08	0.916910653286286
MFAP3L	114313887586607	-188258919337875	0.245562967672685	-766642141207581	1.76861	19.0074	0.709370283899155
MFAP4	916628337507052	-149759509572194	0.313914565087742	-477070917465503	1.83578e+06	4.97836e+08	111379738450843
MFSD2A	314871883929899	-225710014946391	0.340628000653504	-662629068994213	3442.27	16718.7	111379738450843
MIDEAS	826338180734368	-101212206125127	0.107685351006255	-939888343023068	5.51451e-07	7.25808e-06	111379738450843
MIP	205259305036809	-168540685355387	0.219367590660622	-768302577640704	1.55374	13.043	0.92693109113931
MLIP	777939156698395	-106796701628104	0.2376961876648	-449299177564889	7.02295e+08	1.66002e+09	118485111424296
MLYCD	142456486846836	-127072242662803	0.125678105391424	-101109292081574	4.94134e-10	7.91131e-09	118876714947973
MMAA	901614646265523	-117728407655615	0.111590763016416	-105500136815353	5.07897e-12	1.00985e-11	114845450627745
MMP27	0.618078481159412	-150166158799733	0.598730879000801	-250807439646907	0.0121391105914864	0.0122512020978359	176514789994648
MMRN1	174579317341776	-194824820457813	0.209230934923393	-93114730156487	1.26072e-06	2.21514e-05	0.794886437342711
MMUT	589534616057355	-133609620308263	0.129227705966243	-103390847426452	4.68995e-11	1.00293e-09	0.95943424924746
MOGAT2	193036463613163	-222048543755454	0.31374412783821	-707737688304907	14.6909	1055.71	0.862329573726731
MPC1	421611477648871	-152487764966028	0.137116578878495	-111210304554895	9.91205e-15	2.9105e-13	0.998495350515408
MPDZ	257131069767397	-11198901204408	0.177235924113802	-631864068213239	2638.74	130560	0.978648097738888
MPEG1	122505150882096	-111335326737071	0.15887718814902	-700763451532411	242.381	125.338	118876714947973
MPIG6B	513171392764265	-122873098884445	0.241122401398837	-509588068846422	3.47124e+07	1.22683e+08	0.92693109113931
MPO	743376903051243	-111765741668921	0.276640310194563	-404011048101831	5.3426e+09	0.000141982491753418	0.926079317758803
MPPED1	554163509621904	-145121513850716	0.286953097403707	-505732522714498	4.25178e+07	1.45695e+08	0.946377764541293
MRC1	156115659879318	-108640866793411	0.261461409975515	-415513963623103	3.25089e+09	7.50054e+09	111379738450843
MRO	142365176104913	-232442671122891	0.203929302522941	-113981987015693	4.2686e-16	1.62334e-14	0.864675952044456
MS4A3	0.472304847699996	-215600881140121	0.591998386873246	-364191669978796	0.000270615647218987	0.240296316246396	0.00149917233926717
MS4A6A	11891700593232	-180464856379589	0.169880018527709	-106230772720427	2.32759e-12	4.49772e-11	121940613765583
MS4A7	757929494237232	-147348154602706	0.170446841120937	-864481580495575	0.000538922	0.00507838	118485111424296
MSRA	149586560601716	-13823245031591	0.13937230908163	-991821483239884	3.46905e-09	5.21311e-08	118876714947973
MST1	121608963123112	-100463968975178	0.167124844722627	-60113126293051	184027	1.17883e+06	0.6669467798541
MT1A	811424058791623	-116909652397707	0.331372358664975	-352804479132508	0.000418641310721672	0.00081925014547558	111379738450843
MT1E	996743873282018	-256447891898285	0.345770260894096	-741671337596124	12.0062	76.9949	111281493908931
MT1F	30561902405028	-290651873163111	0.366133476033886	-793841296107571	0.204785	1.79077	0.978648097738888
MT1G	191647100150379	-247793404730913	0.438336778064068	-565303705122126	1.57637e+06	5.54894e+06	111383846496267
MT1H	208662140789207	-291580155201308	0.472679390997598	-616866655823353	68868.3	287164	111379738450843
MT1HL1	121943661466853	-271565911177404	0.587706851983871	-462077156767363	3.82316e+08	4.62323e+08	250720538287654
MT1M	214052475024291	-224091841224614	0.43222157490742	-518465190620374	2.16419e+07	6.59854e+07	111379738450843
MT1X	13997771937693	-252403251433748	0.321641543203614	-784734611455227	0.424933	3.16886	111383846496267
MT2A	384354825803389	-243525107541479	0.285242229976368	-853748435361952	0.00137176	0.0152201	0.95943424924746
MTHFD1	125657279168162	-122691987762779	0.168879606069969	-726505648716082	37.2882	261.056	0.95943424924746
MTHFD2L	411039328082765	-140014712504315	0.134447470432144	-104140830656223	2.13848e-11	4.8109e-10	0.946377764541293
MTTP	854445678450994	-108074001226596	0.202468013647242	-533783086423184	9.40651e+06	3.01784e+06	111281493908931
MTUS2	364514068155237	-203469401882228	0.385334335705138	-528033406392117	1.28949e+07	5.95856e+07	0.740277061123834
MUCL3	118674818339039	-157048701047541	0.522759257656955	-300422610881047	0.00266257368449521	0.00549877790902146	0.922866740464942
MXRA5	431893092958776	-101739126131107	0.25149195603674	-404542267412498	5.22288e+09	0.000113372725006583	115299650756476
MYC	274828397220882	-11906445022712	0.198605092647432	-599503510408398	20344.1	885444	0.998495350515408
MYD88	230073248908013	-104337316741597	0.0840646276478676	-12411559970104	2.26202e-21	1.27855e-20	0.862329573726731
MYH6	0.938767532764241	-108043204561296	0.451579891313032	-239256013475589	0.0167312860700458	0.0134233001647187	22004558832929
MYO16	12970436992823	-108761488370421	0.207928898064413	-523070575484551	1.68864e+07	6.4097e+07	0.896246230775245
MYO1B	117173238493751	-115751618950128	0.125372848139582	-923259068193602	2.64164e-08	3.24859e-05	111383846496267
MYOM2	103056615053294	-205934314283415	0.244854063571258	-841049200000241	0.00408294	0.00343572	121585773816799
MYOT	462165962571892	-160422245070123	0.300526781215585	-53380349139348	9.39594e+06	3.59281e+07	0.922866740464942
N4BP2L1	126781317490965	-144975533155823	0.131003438995358	-110665440745383	1.82296e-14	4.4351e-13	118876714947973
NAAA	103692032850409	-163958268209	0.140120191672877	-117012592012275	1.25576e-17	3.88537e-16	121940613765583
NAALADL2	158585686120309	-127951127117966	0.210632577123932	-607461243009348	124288	689487	0.794886437342711
NADK2	987242137097776	-105023300048414	0.137551676043558	-763518868466252	2.2549	15.588	111379738450868
NAMPT	860277970523638	-150715493041865	0.177638404428588	-848439804031531	0.00216838	0.0204189	111379738450868
NAT1	2427448027678	-129758836841456	0.125122442252215	-103705486006975	3.37581e-11	7.76147e-11	0.90593063721884
NAT2	583868577658071	-293878274692133	0.318206775537684	-923544994274738	2.57203e-06	3.70061e-05	0.947962011920702
NCAM1	151374542273196	-113765856914175	0.323003846042454	-352212081398011	0.000428108994795674	0.001026194707471	0.896246230775245
NCKAP5	132810631848379	-127294323655187	0.204576389980159	-622233697972343	48980.4	19172.9	121585773816799
NCOA7	18701403136062	-104441313880036	0.155675041348591	-670893117967242	1960.55	10298	105912715634988
NCOR1	277385368185407	-114280317704073	0.102897917079442	-111061837739478	1.17056e-14	3.4111e-13	0.998495350515408
NCR1	958008014425807	-108206387971255	0.261341636642371	-414041900714538	3.46672e+09	9.49075e+09	0.922866740464942
NDNF	779454103872371	-135967251727984	0.3248084399802	-418607508278639	2.83819e+09	7.84226e+09	0.92693109113931
NDRG2	998891336015187	-150473717735119	0.136362126775374	-110348614599558	2.59451e-14	6.59408e-13	111281493908931
NDST3	131161157075341	-434036408063272	0.347921882282027	-12475110942043	1.02064e-21	5.64024e-20	0.916910653286286
NEGR1	137986307749354	-107892842435832	0.285180499169012	-37833176795125	0.000154751692539259	0.000385888440614008	0.922866740464942
NEUROD6	0.287610480617505	-244806752989435	117194413673032	-208889438768333	0.0367172311694315	1	0.00846725544273538
NFAM1	237563985746982	-126019889564254	0.175647560422569	-717458809340011	72.5252	518.165	0.90593063721884
NFIL3	240428281431368	-142211691440265	0.135918195699128	-104630355567012	1.27698e-11	2.50199e-10	111379738450843
NGFR	650209809649512	-201560722242837	0.24934299523071	-808367293640387	0.0628447	0.494905	115299650756476
NIPAL1	400175199372498	-167387026910602	0.211940082783986	-789784663249407	0.283763	2.62904	0.90593063721884
NKX3.1	109805264433723	-155415215545752	0.193594351555051	-802787965131087	0.0991717	0.0724672	122009024194229
NLRP12	658886472381143	-135795788100421	0.173608176956575	-78219695915814	0.520032	4.57911	0.928448540372894
NLRP14	874866374306612	-121319906895974	0.289725117424947	-418741419364173	2.82151e+08	7.83257e+09	0.922866740464942
NMUR1	360719319047401	-101840030869175	0.19275570176061	-528337319928693	1.26827e+07	4.90087e+07	0.896246230775245
NNMT	322038435863167	-221512427082732	0.30593955995345	-724039830339158	44.7369	269.326	111379738450868
NOCT	333762518043783	-176514814525007	0.195569359549147	-902568863199905	1.78569e-05	0.000234071	0.972157883339661
NOL4	225810839447708	-202584254040331	0.435809465098732	-464845925258726	3.34424e+08	1.04412e+09	0.922866740464942
NPAP1	0.868775845491613	-143109785076665	0.381303959063083	-375316808743097	0.000174613684775028	0.000230029281631041	181201088751161
NPAS4	110105614851092	-152828497997372	0.278322860272505	-549105085538925	3.99549e+06	7.03304e+06	22004558832929
NPY1R	178748264056555	-236550245671455	0.255960283349686	-924167775468065	2.42662e-06	2.76733e-05	121585773816799
NPY5R	125906855629144	-121936225628128	0.363224886616046	-335704490857265	0.000787803156612224	0.00176160028204437	0.922866740464942
NR0B2	332420182933571	-106191572418105	0.212480123500809	-499771793561204	5.80128e+07	1.67596e+08	111383846496267
NR1I2	176124426644957	-136751977167392	0.259277970349937	-527433846318771	1.33236e+07	4.3916e+07	105912715634988
NR3C2	374502653576684	-136624060678917	0.162759424734031	-839423344621529	0.00468944	0.0525255	0.896246230775245
NR4A1	158094769433374	-214343356369652	0.21838718678066	-98148320663579	9.71997e-09	1.92583e-07	0.862329573726731
NR4A2	517568936408123	-189296360736227	0.23082933700621	-820070633964239	0.0238979	0.237598	0.946377764541293
NR4A3	228047523842415	-220180927324771	0.237700060221423	-926297314016949	1.98817e-06	3.02118e-06	0.90593063721884
NRBF2	112510934786946	-110834708414883	0.0806097639052444	-137495388952097	5.12552e-29	3.62187e-27	111379738450843
NRG1	329342215932551	-188934930989083	0.357048304799282	-529157899504086	1.21265e+07	4.65601e+07	0.90593063721884
NRK	147110126214878	-108998170297835	0.310440393677311	-351108207945173	0.000446286578608589	0.00103354450001759	0.92693109113931
NRXN1	500381868203681	-222478171558775	0.467084847066894	-476312115359445	1.90621e+08	6.13708e+08	0.926079317758803
NSUN6	115433406015902	-113297961480575	0.115747555658488	-978836752413676	1.26319e-08	2.99973e-07	0.709370283899155
NT5C1B	10257095128974	-10701341739687	0.176206982677621	-607316553355075	125413	59992.8	0.92693109113931
NTF3	59645589972167	-348827531430241	0.250505795508254	-139249285918715	4.46988e-30	4.94491e-28	0.745029512844227
NTN4	729743391011559	-127366215697017	0.165603435602299	-769103703880218	1.45947	9.71858	118485111424296
NUDT10	100247518552423	-296153216066209	0.361665285245403	-81885994633203	0.00264283	0.269616	0.916910653286286
NUGGC	832354532272923	-117935248332747	0.243718934802392	-483898587643056	1.30503e+08	3.46546e+08	116063127897958
NXF3	136785162866304	-292819968077773	0.303816087467941	-963806658555143	5.52182e-08	9.66975e-07	0.916910653286286
NXPE4	0.461682173557126	-154234933328193	0.577940883534056	-266869740007076	0.00761460184372255	1	0.00846725544273538
OAS2	185475088181724	-113007286511946	0.214071245838872	-527895682902716	1.29921e+07	4.08255e+07	111379738450843
OASL	12876312971527	-108652070961301	0.227023057055641	-478594872126451	1.70182e+08	4.27177e+08	121207511092582
ODF3L1	295986373269494	-147138024076528	0.233758978800179	-629443304517101	30852.5	161384	0.916910653286286
OGDHL	499031503106521	-141205224786501	0.23326150823032	-605351589543342	141718	921154	0.6669467798541
OIT3	105632740413944	-326461932113274	0.1838639444648	-177556253926541	1.55924e-56	4.12932e-54	118876714947973
OLFML3	545098887959286	-151381448962257	0.220182729651507	-687526443158623	618.75	3163.21	115299650756476
OMG	925174030147188	-169899447503883	0.2015054229902	-843150744941218	0.000341241	0.0376397	0.926079317758803
OR13C5	0.339232472504784	-175525036168839	0.560166984126799	-31334412977311	0.00172769473048756	0.26847789267597	0.00845978674471172
OR1L8	0.592206589681143	-120605907439255	0.331678273387656	-363623176783407	0.000276655435331624	0.00026146676602345	250720538287654
OR2W3	0.671670118563594	-110858867431141	0.446926599277581	-248047146019805	0.0131208767080968	0.0103451714126753	229346620018431
OR6T1	0.517015662192522	-113337373120846	0.318586862071172	-355750304278169	0.000374396765883749	0.000376390436066103	229346620018431
ORM1	149953541138516	-182455759555228	0.216959453085581	-840967088367693	0.00411163	0.0377019	111281493908931
ORM2	427073450733634	-155123933750284	0.209082780193395	-741925918561058	11.7777	75.6419	111281493908931
OTC	52797776636557	-113717621503149	0.252434422133236	-450483814933642	6.64235e+08	1.66943e+09	111383846496267
OXT	701418778185334	-161872534637707	0.470711029374778	-343889402491192	0.000584095837668132	0.00136931154797551	0.896246230775245
P2RX3	250333315279348	-133721502842272	0.253099588298724	-528335520974636	1.26839e+07	5.83513e+07	0.745029512844227
P2RY12	164315912702708	-241470431122867	0.249559467211337	-967586739229493	3.8184e-08	6.77741e-07	0.916910653286286
P2RY13	107596510735279	-191304103500565	0.191108828352787	-100102180076903	1.37449e-09	2.07623e-08	122009024194229
P3H2	211661574971236	-134391666109385	0.210411820630834	-638707776523519	16908.6	86063.3	0.972157883339661
PADI4	612088485965904	-222687958699202	0.273668588260856	-813713989297665	0.0404725	0.399586	0.928448540372894
PAIP2B	785154887096025	-138903044976468	0.222207905510818	-625103974843528	40772.9	163339	119634206973591
PALM2AKAP2	218163175902825	-158305946567601	0.244279555585783	-648052376663215	9140.48	50268.9	0.928448540372894
PAMR1	215903808247615	-194126064285641	0.215072095798478	-902609255584397	1.77911e-05	0.000261157	0.864675952044456
PANK1	253483118670666	-158235779315704	0.139361474135919	-113543416713128	7.05694e-16	2.04833e-14	111383846496267
PBLD	532962750896172	-176475927887551	0.180852483168408	-975800413662103	1.70477e-08	2.59202e-07	111379738450868
PCDH19	111940921750689	-111258980013976	0.25546413622211	-43551702269959	1.32964e+09	3.82878e+09	0.928448540372894
PCDH9	971750123546173	-168789235375118	0.29651643720796	-56924073742576	1.25261e+06	5.66824e+06	0.864675952044456
PCK1	489768692522739	-221073701280694	0.290532902446345	-760924836461583	2.75695	30.8884	0.6669467798541
PCK2	222107719072933	-124612298565225	0.181035663029498	-688330113967216	584.812	3099.57	111281493908931
PCSK2	337532647368343	-287987285624921	0.51745793141254	-556542412711277	2.61516e+06	5.6487e+06	181201088751161
PDCD1LG2	696171870446875	-107988854970804	0.215260869633026	-501665050201189	5.25801e+07	2.24899e+08	0.740277061123834
PDE11A	330942304462138	-108417908107308	0.256358303675121	-422915530930897	2.3457e+09	6.77565e+08	0.896246230775245
PDE2A	474555002804364	-148606531174438	0.169603229716554	-876201068946582	0.000191798	0.00233736	0.946377764541293
PDE6G	520531901659364	-101083743849867	0.172771377263352	-585072281363988	489441	2.38757e+06	0.843887822532013
PDE7B	156768918931149	-167201717242875	0.183977655094558	-908815351282414	1.00735e-05	0.000151783	0.864675952044456
PDGFRA	672299562512389	-157708771162774	0.299412839108911	-526726815163087	1.38469e+07	4.05461e+07	119634206973591
PDK4	84133545988769	-12126260478973	0.244232128264656	-496505540247051	6.86815e+07	3.19226e+08	0.6669467798541
PDLIM5	409688302196915	-108269577161588	0.103069016974292	-105045706595411	8.22964e-13	1.86049e-10	0.978648097738888
PDZRN4	143473435312592	-227740975532906	0.353668315875182	-643939435087201	11995.1	65158	0.92693109113931
PELI2	10493241675529	-145308566341051	0.212681084358534	-683222801780024	836.058	537.323	0.896246230775245
PEMT	316415666395859	-131883452632251	0.161344924281254	-817400691219476	0.0298313	0.279058	0.998495350515408
PEX11G	429424800843448	-111296242592817	0.157698447115612	-705753573535344	169.481	1107.87	0.945542994669583
PF4	76870649251408	-117668430693849	0.367369247216725	-320300165529184	0.00136003199321474	0.00292590793439043	0.926079317758803
PGA3	0.189378434468146	-136651999217539	0.638241055793665	-214107190343012	0.0322682400481873	1	0.00843043967012994
PGLYRP1	260261016757098	-208522274408401	0.227979533319859	-914653483897786	5.8789e-06	3.50115e-05	229346620018431
PGLYRP2	830693572537976	-155034053011658	0.265874386570562	-5831101484103	550627	2.04999e+06	111383846496267
PGM1	876758739544601	-125642801137142	0.119443600045147	-1051900655118	7.06142e-12	1.42693e-10	111281493908931
PHACTR3	769995833683381	-291399793166225	0.257772545156629	-113045317913575	1.24617e-16	4.2234e-14	0.922866740464942
PHGDH	419661358504961	-150058185092232	0.222726404453781	-673733253406742	1613.21	9082.47	0.995031561367341
PHLDA1	46038135864252	-247605227220644	0.190808879722778	-129766092427346	1.66071e-24	8.92021e-23	111379738450868
PHLDB2	145828402655616	-10133895426646	0.119459424663803	-848312760183303	0.0021922	0.0318215	0.709370283899155
PHOSPHO1	114388470606242	-118141065247809	0.16508394648852	-715642361118523	82.809	580.834	0.916910653286286
PHYHD1	109952973962078	-12381051619759	0.251594629059358	-492103176687366	8.60892e+07	2.29002e+08	118876714947973
PI16	139225227859683	-182046809790293	0.347510258064166	-523860247477007	1.61797e+07	5.97537e+07	0.926079317758803
PIK3C2G	474212160602425	-121708127364265	0.253643442210824	-479839440371193	1.59943e+08	5.0957e+08	0.946412670017622
PIM1	207532228538818	-138921250098335	0.153329508023216	-906030756175782	1.30083e-05	1.5206e-05	111379738450843
PINK1	177170147858836	-102297812858582	0.13765662238991	-743137606331973	10.7474	88.2533	0.862329573726731
PITPNM3	816154140546174	-250799083169925	0.278968151859276	-899024069587841	2.4669e-05	0.000366916	0.843887822532013
PLA2R1	763877358813811	-103680158971357	0.224978767764348	-4608441943284	4.05698e+08	1.36237e+09	0.843887822532013
PLAAT3	277588346047427	-100654964644531	0.173273256285929	-58090305914511	628356	2.32541e+06	111379738450843
PLAC8	148678971903217	-22653807892863	0.26887291767676	-842547032576091	0.00359304	0.030544	121585773816799
PLCXD3	916131069235055	-175673907120522	0.316108245052069	-55573971849923	2.73827e+06	8.59077e+06	122009024194229
PLCZ1	455901155787542	-115723167491868	0.270943823387027	-427111295785341	1.945e+09	5.48545e+08	0.928448540372894
PLEK2	529352667275361	-117143938804959	0.284812473174156	-411301996360702	3.90517e+09	0.000103668303334972	0.946377764541293
PLG	717533379674052	-170444170781999	0.209804940827976	-812393502790528	0.0451307	0.608946	0.6669467798541
PLGLB1	132968972809521	-123102941175215	0.211437815285454	-582218185564482	580843	2.74298e+06	0.864675952044456
PLGLB2	180545231947964	-189423105879073	0.229815224228898	-82424089402539	0.0168778	0.134364	121585773816799
PLIN1	523888111778452	-164660593446707	0.247298547671383	-665837284517791	2768.76	15894.2	0.945542994669583
PLIN2	185096381855901	-165526081459734	0.174511077305391	-948513320848208	2.42074e-07	3.83031e-06	0.95943424924746
PLK3	395157751420917	-159812570655488	0.140587901901212	-113674483006215	6.07373e-16	2.15303e-14	0.90593063721884
PLP1	832507611794698	-185049407691109	0.555164939435579	-333323296458966	0.000858430311398564	0.00190927081439363	0.922866740464942
PLPBP	223273931208256	-10821186423956	0.107309092490111	-100841281692446	6.49391e-11	1.151e-09	105912715634988
PLPP3	540504319308967	-167374545891011	0.139432110759285	-120040172224005	3.38461e-19	1.28819e-17	111383846496267
PLPP4	197524310422144	-206404668341231	0.362314366896446	-569683918717538	1.22049e+06	5.18366e+06	0.92693109113931
PLSCR4	102977348997393	-19301427549534	0.147641117743225	-130732060584252	4.68486e-25	2.6226e-24	111379738450843
PMP2	306951387578724	-146045269507373	0.682077208711542	-214118383728516	0.0322592159146969	0.021804645345358	250720538287654
PNPLA7	570662170997189	-137261056668567	0.158398284766586	-866556458429038	0.000449281	0.00527936	0.947962011920702
PNRC1	499810543380868	-144019202140872	0.116951689409724	-123144182754231	7.57595e-21	5.2312e-19	0.6669467798541
PON1	16494754977206	-136262837795563	0.234228522531347	-581751685588705	597282	3.60623e+06	0.6669467798541
PON3	767762043924377	-152054848224343	0.184030688735728	-826247237724013	0.0142686	0.124676	111281493908931
POU6F2	236951389632686	-168662727911861	0.471247810096333	-357906656112381	0.000344823643218915	0.00088616674405423	0.843887822532013
PPARGC1A	299156098211408	-107191088387012	0.246150066241488	-435470483610805	1.33246e+09	3.58022e+09	0.998495350515408
PPBP	829350635429706	-254352609762857	0.352847415421059	-720857227930473	56.5416	405.139	0.916910653286286
PPM1K	463047947429765	-127968510346749	0.168325366449617	-760244953246852	2.90577	23.2776	0.946412670017622
PPP1R17	0.32715765933513	-134884733389574	0.623090679494174	-216476891451937	0.0304053864995322	1	0.00149917233926717
PPP1R1A	388574137832911	-113300842498388	0.276660567007995	-409530146358422	4.21619e+09	9.56013e+09	111379738450843
PPP1R3B	46152884486665	-166118893608972	0.175921655855054	-944277683162792	3.63029e-08	5.63284e-06	0.95943424924746
PRAM1	616402654432763	-152221013168785	0.167546937985511	-908527574415886	1.03436e-05	1.58937e-05	0.843887822532013
PRELP	101877766698359	-110563024324067	0.274747785947785	-402416434194958	5.7178e+09	0.000117744001725667	121207511092582
PRG4	794445078420902	-134017676190004	0.272949470542585	-490998117430289	9.10851e+07	2.56857e+08	111383846496267
PRIMA1	143598371969583	-137467399548888	0.502499401734854	-273567289979429	0.00622528727740868	0.0121125156499896	0.916910653286286
PRKAR2B	86669842821967	-187783070423822	0.230980275403782	-812983143671267	0.0429888	0.438423	0.896246230775245
PRKCB	194770402520565	-114828303203307	0.199426545911841	-575792468742191	851543	381639	0.896246230775245
PRODH2	435238036791742	-103219933934796	0.219576624723926	-470086167252888	2.59066e+08	7.78149e+08	0.978648097738888
PROK2	372411652523266	-289554248601334	0.303291771790789	-954705255904762	1.33439e-07	1.17167e-06	181201088751161
PROS1	935317431381299	-121938842520183	0.130120035289109	-937125802719401	7.16731e-07	9.31927e-06	111383846496267
PROZ	126948157702654	-159739092609996	0.233317376585346	-684642931220189	75.716	3640.99	121940613765583
PRR18	197675961597102	-146805531362393	0.216295068138626	-678728057120116	1142.67	7220.33	0.896246230775245
PRSS48	0.327784312436687	-102184563806971	0.467153930571466	-218738529464943	0.0287144087723778	1	0.00848142972677847
PRUNE2	835974138383778	-104535559886358	0.233647727096045	-447406705751462	7.67457e+07	2.35559e+09	0.896246230775245
PSAT1	447133803920717	-129946059740891	0.178615235150512	-727519461771504	3.45921	211.053	111379738450843
PTCRA	852210368373193	-109577994141518	0.245384305600764	-446556652729861	7.98572e+08	2.37937e+09	0.922866740464942
PTGDR	171518925735889	-117546254752938	0.196629281959419	-597806458842673	22580.4	1.04894e+06	0.926079317758803
PTGER2	498572683525247	-118867039198858	0.205857038920631	-577425187023542	772957	3.40749e+06	0.916910653286286
PTGIR	141617766214019	-109310470077331	0.189867364432323	-575720163410673	855197	2.86358e+06	121585773816799
PTGIS	341631292603518	-161861607000465	0.290197324052455	-557763954333389	2.43804e+06	1.02863e+07	0.896246230775245
PTGS2	696089909983041	-242791681224162	0.257661101049708	-942290785202079	4.38765e-07	7.58723e-06	0.843887822532013
PTH1R	284802774197975	-323405537118756	0.226559919374734	-142746138863087	3.15028e-32	3.29275e-30	0.896246230775245
PTPN3	219120611722324	-102167573234138	0.103856779861825	-983735230093457	7.77295e-09	1.20631e-08	111379738450843
PTPRD	399881156114127	-104651674274909	0.271906156675243	-384881591334846	0.000118690157799776	0.000320414031590751	0.864675952044456
PVALB	15099336503713	-364915801013817	0.32102966038952	-113670431751087	6.10198e-16	2.14073e-14	0.916910653286286
PXDC1	546218912971915	-134250859278134	0.12153739219676	-110460539634412	2.29064e-14	5.85089e-13	111383846496267
PXMP2	3447343014963	-105925911895516	0.152896715918525	-69279389854234	427.016	229.212	111383846496267
PZP	100654303811099	-431675975396013	0.362144825207796	-119199818787503	9.31288e-19	3.42371e-17	111379738450843
QDPR	591121682645364	-107553977350448	0.1394453231178	-77129856309049	1.22908	14.2817	0.6669467798541
RANBP3L	111954581828107	-233308934505179	0.296794772666424	-786095160669832	0.381226	3.94441	0.794886437342711
RASD1	25877154917313	-122690776850612	0.250799070603654	-489199487682728	9.9819e+07	2.80158e+08	111383846496267
RASGEF1B	104402821211017	-183444631882985	0.165725910686505	-110691581734613	1.77056e-14	7.03853e-13	0.709370283899155
RASGRP4	532261134069896	-103863531677163	0.142401889360555	-729369056432848	30.1578	241.226	0.843887822532013
RBMS3	196522574618039	-151853604421271	0.1620173398623	-937267606975479	7.07164e-07	8.42591e-06	122009024194229
RBP4	262168526522079	-102518174713362	0.182959391357481	-560332945757637	2.10273e+06	7.30481e+06	111383846496267
RBP5	532889733802596	-101792236672435	0.209032554999445	-48696834171455	1.11777e+07	3.11876e+08	111281493908931
RCAN1	33626192240574	-239129603791813	0.157001855894015	-152310049094731	2.20181e-38	2.63625e-37	111383846496267
RCL1	179601376043103	-146387587660561	0.163392997504361	-895923264132866	3.26946e-05	0.000693532	0.572985601436948
RCVRN	13431347995548	-198003950400353	0.258130099134729	-76707036902739	1.71055	6.27247	22004558832929
RD3L	198646457175971	-42499179726742	0.699402097745562	-607650160955093	122833	260826	22004558832929
RDH16	106300530029611	-201442052841867	0.275953400042048	-729985761404541	28.8072	177.357	111281493908931
RDH5	436330553399183	-153764736024404	0.199695859211876	-769994613965731	1.36124	11.2706	0.945542994669583
RET	118611452640583	-220781607144347	0.344982670387294	-639978833999073	15559.2	64501.9	121585773816799
RETREG1	102273022813053	-227697783399387	0.292848049975446	-777528767627028	0.752761	5.03396	121940613765583
RFPL1	130148431197144	-401138134657256	0.418632087252231	-958211629906823	9.50765e-08	6.75241e-07	229346620018431
RGN	760489198837976	-108902974582358	0.175970476192336	-618870715922409	60659.7	254837	111383846496267
RGS18	468949350710513	-124045514751256	0.185177399356746	-669873943484219	2102.25	12598	0.916910653286286
RHOB	27850884440702	-147383576651276	0.153643764975516	-959255174948114	8.59329e-08	1.40986e-06	0.95943424924746
RIC3	409404344229666	-126348788876779	0.341124465521142	-370389114963519	0.00021231739120825	0.000638296562282858	0.740277061123834
RIDA	150613861777028	-122318251902394	0.18214111625536	-671557605537593	1873.25	9396.91	111383846496267
RIPK4	117537201765155	-138143318819897	0.133071082484406	-1038116743629	3.02059e-12	5.28816e-10	121207511092582
RIPOR3	149453351174655	-242770919445066	0.234119008534076	-103695518345633	3.41121e-11	7.91044e-10	0.896246230775245
RIT2	0.369842067277152	-122975848863466	0.508828837352997	-241684118186392	0.0156558463816659	1	0.00843043967012994
RMDN2	496877763113146	-11548023158324	0.120339100550732	-959623522651776	8.29179e-08	1.14611e-06	115299650756476
RNASE3	0.664806075898601	-113571636152514	0.399664510699276	-284167428210733	0.00448773155031025	0.00382077848041306	229346620018431
RNASE4	103142462292138	-103942019718574	0.180363024322293	-576293395551181	826641	2.7825e+06	121207511092582
RND1	293706299493899	-101982063177394	0.199081091191875	-512263935097195	3.01288e+07	1.00219e+08	0.998495350515408
RND3	234282116536859	-248214187279168	0.16448595174475	-150902970525014	1.87596e-37	2.1945e-35	105912715634988
RNF125	603796627233039	-188337380136793	0.186054912790767	-101226770802119	4.38261e-11	8.77046e-09	0.946377764541293
RNF152	182567995115992	-180455733853841	0.153818600080313	-117317238461161	8.76551e-18	3.15975e-16	105912715634988
RNF165	785250647806225	-176577934212235	0.231353279411506	-763239382909968	0.230434	19.1443	0.916910653286286
RNF180	158895092408442	-115178967095788	0.184772224633109	-623356499195116	45593.8	247160	0.864675952044456
RPS6KA6	291920328006537	-126007597445333	0.428041825069827	-294381506818352	0.00324193653020839	0.00662632069239567	0.916910653286286
RSAD2	329463150650036	-162739760149653	0.225719554620655	-720982107301932	56.0254	424.385	0.864675952044456
RSPH10B2	0.645758913044898	-128080629692153	0.35361484079047	-362203773478064	0.000292291471138612	0.000372281551855995	181201088751161
RSPO3	741023370925895	-288829543748637	0.364387487524142	-792643967308292	0.225518	2.55919	0.740277061123834
RTL5	254765709522279	-107082002129495	0.212202779003744	-504621111147682	4.50657e+07	1.60583e+08	0.90593063721884
RUNDC3B	390622683190778	-104254214662414	0.205327364644423	-507746324231827	3.82507e+06	1.4355e+07	0.864675952044456
RXFP1	220392643875355	-177910940133966	0.196800993026448	-904014443209935	1.56465e-05	0.000215964	0.92693109113931
S100A12	117600994658409	-296862469194233	0.263016993999397	-11286817048594	1.52458e-15	5.11101e-14	0.92693109113931
S100A8	221700471760224	-150301908413946	0.277448424834525	-541729182652916	6.05085e+06	2.43293e+07	0.900484214151191
SAA1	727939802884984	-201274685345348	0.407244088392861	-494235990360605	7.71826e+07	2.19592e+08	111383846496267
SAA2	276552472856074	-226350492504561	0.428677791192661	-528020105438193	1.29042e+07	4.05773e+07	111383846496267
SAA2.SAA4	275257116854071	-223965312642079	0.413340795144564	-541841781099173	6.01288e+06	1.97391e+07	111383846496267
SAA4	577167831904174	-182999025231308	0.254769349259902	-718292941293431	68.2333	402.764	111379738450868
SAMD11	106291512451505	-111800722399436	0.274999387549748	-406548986874422	4.79317e+08	9.89554e+09	122009024194229
SAMD12	130449275453022	-113540904103801	0.277966484517523	-408469763183423	4.41342e+09	0.000126771671097763	0.864675952044456
SAMD5	395942359556318	-160068623417183	0.286737617576165	-558240752539782	2.37212e+06	9.93173e+06	0.90593063721884
SAMSN1	161255138959871	-101245650341259	0.190301718490204	-532026989270047	1.03613e+07	4.05209e+07	0.896246230775245
SARDH	573053391012345	-148568940819134	0.165788864784067	-8961334104835	3.20774e-05	0.000588676	0.6669467798541
SATB1	533082265111292	-10969420055146	0.174978245596773	-626901933879505	36332.9	182946	0.946377764541293
SCARA5	801410445772297	-172929580954554	0.395263616754423	-437504423944981	1.21408e+09	3.8442e+09	0.843887822532013
SCGB2A2	0.735524639763096	-226637735127548	0.76973903124579	-29443451082472	0.00323638897376834	0.0029296629679606	22004558832929
SCGB3A1	244472529259511	-217550480267836	0.238174185023275	-913409151569368	6.59582e-07	9.54037e-05	0.916910653286286
SCIMP	130254973386846	-165200837230317	0.172542572361845	-957449717881042	1.02354e-07	1.9926e-06	0.794886437342711
SCN11A	102325730603303	-128731041768851	0.243480542234637	-528711824720663	1.24258e+06	4.7087e+07	0.916910653286286
SCN7A	403381203594743	-156696262874825	0.345076822141854	-45409095256595	5.60121e+08	2.09192e+09	0.740277061123834
SCP2	211181446249486	-138096359472507	0.156291711575596	-883580825114398	9.93771e-05	0.00173527	0.6669467798541
SDC4	207230063178825	-12696536839067	0.127726943287088	-994037476535345	2.7778e-09	7.3447e-08	0.6669467798541
SEC24B	182909735432923	-10610634790117	0.115776530812905	-916475447624517	4.96599e-06	6.28791e-05	105912715634988
SELE	146567203145128	-105362615414446	0.277860816212849	-379192060436961	0.000149486709391217	0.00028823885840772	122009024194229
SELP	111020316507475	-147646670597872	0.246321884578116	-599405411544132	204673	985963	0.896246230775245
SEMA6D	125773404986056	-115130290285579	0.209956408220664	-548353304675404	4.16914e+06	1.7153e+06	0.896246230775245
SERPINA1	107009549582638	-107869525411335	0.159512331031641	-676245684040177	1356.71	6916.71	111379738450868
SERPINA10	124170027358186	-115494628371238	0.164262182525184	-703111492832691	204.89	1135.18	111379738450868
SERPINA11	954799124831528	-197037903516677	0.252791531817722	-779448196305695	0.0646733	4.74305	111379738450868
SERPINA3	109494580525969	-111476752698372	0.229582081100953	-48556382172245	1.2e+08	3.32962e+08	111379738450843
SERPINA4	12691796590618	-11648659601196	0.21612058541283	-538988897283659	7.05012e+06	2.29744e+07	111379738450868
SERPINB2	199778286534461	-151081514859519	0.453988266927373	-332787267569821	0.000875118527313185	0.00106188806815263	176514789994648
SERPINB8	546250962428116	-145994156237327	0.178692143388009	-817014970380193	0.0308007	0.302084	0.946377764541293
SERPINB9	615244552101294	-159367766317428	0.150463627339004	-105917801621492	3.25345e-12	7.93249e-12	0.945542994669583
SERPINE1	9149874025504	-220000203240248	0.237530020996732	-926199569709443	2.00646e-06	2.50912e-05	111281493908931
SERPINF2	61726358409392	-126007544542597	0.179762795682085	-700965647894377	238.904	1515.66	0.95943424924746
SERPING1	125564489266701	-121899326692108	0.147113634391062	-828606588347013	0.0117056	0.16777	0.6669467798541
SERTAD1	867417788143406	-154726066619499	0.140622979167073	-110029006308898	3.70034e-14	8.91177e-13	116063127897958
SERTM2	293122474366882	-149962874454176	0.49176802879702	-304946368353837	0.0022925034821866	0.00491119873911443	0.896246230775245
SFRP1	989496464489379	-24082335253716	0.308023383235635	-781834645173455	0.535217	3.62488	122009024194229
SFRP5	450431836711303	-159068233801875	0.552655336974862	-287825382583992	0.00399883245922203	0.00781789298289515	0.945542994669583
SGCA	777939658357691	-116074673724943	0.263270974648463	-440894306255878	1.03876e+08	3.31585e+09	0.843887822532013
SGK1	32352640930516	-11265671650583	0.181659724442557	-620152413263474	55918.9	266658	0.978648097738888
SGMS2	783220794617489	-178496630910524	0.145031155791589	-1230746800136	8.25732e-21	3.30017e-19	116063127897958
SH2D1B	176000983542994	-144363143732917	0.176804797878194	-816511460465984	0.032113	0.320787	0.92693109113931
SHBG	186150487786163	-177778996659995	0.28636671121466	-620808877910156	53632.9	288711	0.862329573726731
SHMT1	136800932034456	-127663020584156	0.177916406634614	-717544958326056	72.07	423.967	111383846496267
SIGLEC1	571721863981336	-135183625219941	0.178535248772465	-757181711451424	0.368039	29.1492	0.946412670017622
SIGLEC11	476534497226753	-232722617252154	0.20986475407611	-110891711319831	1.41594e-14	5.42309e-13	0.745029512844227
SIGLEC14	570440019628748	-170203097122671	0.300040684075549	-567266728000841	1.40591e+06	6.11917e+06	0.896246230775245
SIGLEC5	951102313026981	-116659109482738	0.198828007227735	-586733786197022	442848	1.99378e+06	0.922866740464942
SIGLEC7	704632664588397	-203351910633128	0.179396145365681	-113353556297777	8.76752e-17	3.01526e-14	0.916910653286286
SIGLEC8	362016043775787	-122686422093612	0.248416365667484	-493874152630641	7.86283e+07	2.90662e+08	0.843887822532013
SIGLEC9	901828193809768	-13866627229985	0.169680302498445	-817220798513846	0.0302796	0.323937	0.864675952044456
SIK1	23699420530822	-152086979123741	0.383403763979943	-396675759113562	7.2857e+09	0.000196071117957701	0.896246230775245
SIK1B	814500180498389	-113079392885636	0.220528344269334	-512765800062101	2.93369e+07	8.55677e+07	114845450627745
SIRPB1	422872900910132	-108670001089879	0.220402256677539	-49305303279571	8.20067e+06	3.39733e+08	0.745029512844227
SIRPD	0.842738452984987	-106298549506596	0.308893000971602	-344127413610023	0.000578981619957215	0.000520996670476641	250720538287654
SKAP1	464472359728651	-152032358247233	0.218474099985852	-695882753411402	343.116	2172.96	0.945542994669583
SLAIN1	133668591792152	-158290958136796	0.265024924967786	-597268193382328	23338.5	1.15519e+06	0.864675952044456
SLC10A1	824268111116515	-15105084762912	0.310713885475395	-486141285247073	1.16551e+08	3.24095e+08	111281493908931
SLC13A5	143456959393409	-111665177410135	0.259060191983566	-431039506900462	1.62963e+09	3.9054e+09	111281493908931
SLC16A2	363337276553882	-117845206559533	0.185386809023574	-635672015610064	20610.7	101553	0.995031561367341
SLC16A4	213777919000428	-160532205959977	0.246914362481861	-650153374418512	7950.52	42139.7	0.972157883339661
SLC17A8	878057299891922	-241220373146013	0.372294952772832	-64792813157798	9216.05	50630.7	0.928448540372894
SLC19A3	811284061135095	-145689661812037	0.200532359620148	-726514474212568	0.0372639	21.1592	119634206973591
SLC1A1	205439916392103	-141263169584397	0.247649706191816	-570415252077794	1.16923e+06	3.94331e+06	118876714947973
SLC22A1	147671948330625	-23667842032554	0.33713008195894	-702038865681423	221.252	1223.04	111383846496267
SLC22A10	141376111824681	-230517023181239	0.272705783281012	-845295689764309	0.000284017	0.0249086	118876714947973
SLC25A25	428776896229102	-101250980579583	0.187903112854556	-538846744162004	710610	2.57191e+07	0.998495350515408
SLC25A47	857440671826531	-264043493643708	0.348450398253047	-757764935748351	3.51872	23.9444	111281493908931
SLC27A2	806181513884665	-132378704873677	0.202572140916421	-653489192910763	6365.55	2993.68	111383846496267
SLC27A5	255791591658118	-151508889853463	0.245774494155865	-616454894450437	70684.3	294097	111379738450868
SLC27A6	119564402116528	-199491033418455	0.557057918818945	-358115425127442	0.00034207960928663	0.000431289312490468	181201088751161
SLC28A1	211999202895942	-124278110142375	0.273214598069972	-454873608585682	5.39691e+07	1.7482e+09	0.862329573726731
SLC2A2	19750054361522	-117454532745549	0.204779479009851	-573565932062454	971337	3.51769e+06	111379738450868
SLC31A1	538133705216128	-10449774246956	0.104621349100596	-998818533386362	1.71696e-09	2.81385e-08	111281493908931
SLC35D1	377180848429731	-136365641161512	0.120827435272449	-112859832581919	1.53911e-15	4.80545e-15	0.998495350515408
SLC38A2	118754784211097	-162938227668949	0.141320875530074	-115296644644884	9.35074e-17	3.40298e-15	0.95943424924746
SLC38A4	149613864245984	-150845547797612	0.206343329231276	-731041552734373	26.6318	267.842	0.6669467798541
SLC39A14	176367422057842	-164377964810811	0.143440825803739	-114596359780944	2.10397e-16	6.47771e-16	111383846496267
SLC39A2	185835858580923	-137597905447429	0.315579751484015	-436016267838396	1.29966e+09	2.03918e+08	176514789994648
SLC39A5	591116778512653	-114071111610192	0.264444798470369	-431360768939356	1.60612e+09	4.43176e+09	0.95943424924746
SLC3A1	606298556654309	-105401246604048	0.38164719237967	-276174563074454	0.00574932516492161	0.010936063774558	0.946377764541293
SLC41A2	255424907141122	-136922650259916	0.15170785662769	-902541590815179	1.79014e-05	0.000229565	0.995031561367341
SLC46A3	241795569537796	-135926014956799	0.230025667608087	-590916728425227	343841	131302	111383846496267
SLC4A1	861221979327099	-153004259344256	0.367844632579779	-415948054675155	3.18972e+09	8.75396e+08	0.926079317758803
SLC4A10	109366026150698	-128582862051999	0.266947012018343	-481679345574255	1.45884e+08	4.78666e+08	0.922866740464942
SLC4A4	145989735746109	-124621658819876	0.23028605243573	-541160254829834	624632	2.04594e+07	111379738450843
SLC5A1	124438335554247	-192021301693484	0.458911517685109	-418427723631994	2.86075e+09	9.12156e+09	0.794886437342711
SLC5A7	0.769435009773206	-219202173216679	0.603824820048645	-363022793927251	0.000283171040046231	0.000267145633647086	250720538287654
SLC5A8	0.548880736200809	-125054301523564	0.555549746282936	-225100096544504	0.0243854762297222	0.0190050847114365	22004558832929
SLC6A12	267492484128286	-116195272040657	0.223431316346581	-520049176367103	1.98762e+07	6.0912e+07	111383846496267
SLC7A2	104089489668584	-1717518642241	0.20829575554188	-824557676546448	0.0164365	0.142268	111379738450868
SLC7A4	141228333714326	-112875169941812	0.408595113971904	-276251883789226	0.00573572518162984	0.0111315930316308	0.926079317758803
SLC7A8	36313006371568	-142242919932883	0.198052294380956	-718208897187915	68.6542	492.167	0.90593063721884
SLC8A1	159638839273451	-132025192427988	0.162392813275417	-812998985392747	0.0429326	0.32535	122009024194229
SLC9A9	20387595423059	-119726957008455	0.160946795194675	-743891525541953	10.1515	6.0069	122009024194229
SLC9B2	129934569923371	-144007524262326	0.14831148849904	-970980237065438	2.73868e-08	3.82717e-07	118876714947973
SLCO1B1	660890984571606	-129812049292446	0.218133888453506	-595102623497747	26646.6	1.03058e+06	111281493908931
SLCO1B3	1296490431691	-201915104563933	0.423892975758755	-476335103695718	1.90404e+08	5.15212e+08	111379738450843
SLCO4C1	240191785335608	-148914413646229	0.371723396309238	-400605437066293	6.17414e+09	0.000167074834533189	0.900484214151191
SLITRK2	272070346769029	-184765737807829	0.369958172178806	-49942331782991	5.907e+07	1.10397e+08	176514789994648
SLITRK3	139826245505123	-274727184312944	0.537161114035621	-511442800185134	3.14693e+07	1.29299e+08	0.794886437342711
SLITRK6	107730533335788	-282687460701196	0.445509693779124	-634525947804288	22205.1	11673.2	0.92693109113931
SMIM14	927099150985876	-108714629337124	0.126534448910418	-859170212327632	0.000856903	0.0137381	0.6669467798541
SMIM24	830395181817276	-154388027173857	0.40768436803301	-378694988769734	0.000152507842515266	0.000319777122781649	111379738450843
SMIM35	0.219255606558531	-147737338234318	0.618937374354435	-238695131940306	0.0169887406752159	1	0.00846725544273538
SMPD3	129080977353362	-193437619044472	0.222163413089298	-870699708627181	0.000312031	0.0040574	0.864675952044456
SOCS2	109030076102013	-219053418464573	0.206222275192735	-106221996755611	2.34958e-13	4.64583e-11	118876714947973
SOCS3	233205907844675	-231095465599516	0.221931044659713	-104129400171957	2.16432e-11	7.85902e-10	0.572985601436948
SOCS6	13803177576126	-107924830110272	0.0897208512088778	-120289574447988	2.50301e-19	1.48926e-17	0.709370283899155
SORD	101935294333053	-109638924642393	0.178568835337589	-613986894382316	8258.96	340997	111379738450868
SORL1	486760005705294	-134338535102336	0.166906099412152	-80487493012826	0.0836444	0.672943	111281493908931
SOWAHC	196024703602649	-117215047265458	0.114609256784715	-102273630031156	1.49536e-10	2.66903e-09	111379738450843
SOX6	413536159717171	-137116814685958	0.223451034089588	-613632491094149	84452.3	405517	0.946377764541293
SPART	427549626839088	-134699210366543	0.19725180140343	-682879494170239	856.309	5230.57	0.945542994669583
SPATA18	237934974444228	-110891794208827	0.272040164837841	-407630227231071	4.57575e+09	0.000126788223233921	0.896246230775245
SPATA22	184164541589477	-217177376031038	0.431488686336689	-50332113658613	4.82331e+07	8.89942e+07	181201088751161
SPIC	994264638581786	-184824079107011	0.264035864434229	-699996114175807	256.034	1672.18	0.928448540372894
SPP2	519094670471976	-159716390321802	0.304419161271378	-52465945196998	1.54936e+07	4.82289e+07	111379738450868
SPRY2	631982146962586	-154367432309353	0.118638515597853	-130115781988212	1.05148e-24	5.54213e-23	115299650756476
SPRYD4	302305577392478	-131302179865534	0.128927630475314	-101841769201425	2.33326e-10	4.53746e-09	0.998495350515408
SPSB4	871287781865506	-266112934886478	0.329479247717123	-807677377954171	0.00665028	0.0646664	0.922866740464942
SPTBN2	170069875739662	-123699742475852	0.213790667895443	-578602161139928	720729	2.49156e+06	118876714947973
SRD5A1	25710051058386	-133280080948192	0.167272513559639	-79678411062241	0.016147	1.25748	111379738450843
SRD5A2	132595420428327	-199814664671079	0.309824734313691	-644928059451739	1123.82	48422.5	118876714947973
SRGN	164216875866143	-110126359270964	0.161659258747092	-681225190097226	960.827	6362.63	0.862329573726731
SRPX	225070640855367	-200355705328255	0.275098490229397	-728305361331443	32.6347	242.991	0.90593063721884
SSC5D	147218768765109	-107160527401496	0.239646967300892	-447159956199025	7.76367e+08	1.78181e+09	121585773816799
ST3GAL6	135027794685061	-139324399635615	0.169045437721384	-824183139832771	0.0169594	0.1465	111379738450843
ST6GAL2	675573867816082	-21239282763255	0.320741720453626	-662192705495755	354.546	22331.2	0.843887822532013
ST6GALNAC1	148753570010296	-101283587943129	0.291126662252355	-347902137026989	0.000503248453508524	0.00115461965566157	0.92693109113931
ST8SIA6	943310024519761	-243444706082869	0.282839535894372	-860716679204933	0.000748884	0.00880049	0.92693109113931
STAB1	279842243373457	-109757449399869	0.143252218842942	-766183241602732	0.183299	14.2324	0.998495350515408
STAB2	245736153131415	-484116888831497	0.290958185233988	-166387100758884	3.65405e-48	8.07174e-46	0.896246230775245
STARD5	272638730105605	-15012869548393	0.169756891107175	-884374675483113	9.25613e-05	0.00122352	0.896246230775245
STEAP3	621815933598981	-170717003778802	0.182254113915935	-936697669593045	7.46399e-08	9.69932e-06	111281493908931
STEAP4	97058875949623	-165728187697526	0.264151029188122	-627399363943037	35190.3	145968	116063127897958
STX11	118935333544147	-13298010014219	0.187698783418613	-708476089829591	139.285	726.895	122009024194229
SUCLG2	668854231831696	-105406153440434	0.11631759665439	-906192669657916	1.28166e-05	0.000150119	111383846496267
SUCNR1	176027196493074	-115295608485722	0.200543345353604	-574916152328214	896871	4.14721e+06	0.864675952044456
SULT1A1	462946368989636	-111252921676401	0.180907900333124	-614969945875994	77629.9	321443	111379738450868
SULT1A2	866553428850747	-101621534148787	0.218096437255861	-465947703811267	3.17014e+08	8.00819e+08	116063127897958
SULT1E1	433206427204228	-110454341812161	0.313943845246896	-351828339636014	0.000434348239480776	0.000820876836485533	115299650756476
SULT2A1	273605377313051	-112156652931263	0.250145106477976	-448366368266883	7.33723e+08	1.83498e+09	111383846496267
SVEP1	330468539073315	-146949595848808	0.272091316913207	-540074551131974	6.63645e+06	2.65487e+07	0.900484214151191
SYDE2	10311105506912	-126452147288403	0.157791751363731	-80138629678375	0.111161	0.112066	0.864675952044456
SYNE1	117334370801329	-130236277246872	0.126034985198009	-103333433206869	4.97942e-12	8.46495e-10	121207511092582
SYNPO2	492324764528148	-107799262106513	0.192403609783095	-560276713248985	2.10957e+06	8.53729e+06	0.946412670017622
SYT10	256808598428472	-320874202458257	0.585614675780406	-547927187840112	4.2708e+06	9.22094e+06	176514789994648
SYT9	987547086922775	-231928891401684	0.520436077297611	-445643377772705	8.33343e+08	2.84929e+09	0.794886437342711
SYTL5	970930108697643	-163813385243935	0.236429867085632	-692862485028611	424.951	2809.47	0.896246230775245
TACSTD2	293367888638056	-148397654177757	0.342165484104657	-433701413706496	1.44431e+09	3.95988e+09	0.972157883339661
TAGAP	11866103749427	-108980613858475	0.197818194789806	-550912993490178	3.60612e+06	1.11315e+07	122009024194229
TAPT1	162335498315468	-103533228103747	0.0962573180075051	-107558812407047	5.56e-13	1.168e-11	118876714947973
TAS2R60	115816598246825	-121274197842367	0.596189039371171	-20341567830613	0.0419357903270675	0.0312671125079847	22004558832929
TAT	503750047088963	-131533149171765	0.314859157565278	-417752337867116	2.947e+08	6.84045e+09	111383846496267
TBX15	939381713229027	-176904928359175	0.26877185502103	-658197370946199	4642.44	21325.5	116063127897958
TBX20	232736390237715	-277518262038245	0.35876595667319	-773535662668922	1.03114	0.371198	229346620018431
TBXA2R	182908855434857	-178782450397435	0.146959250051543	-12165443844789	4.74857e-20	1.75261e-19	121585773816799
TCEAL2	48548456115133	-109777162754196	0.429527116171278	-255576792759275	0.0105953757115801	0.0197536166094789	0.916910653286286
TCF21	512172254108226	-172241621989396	0.210963657035773	-816451631572679	0.0322726	0.332456	0.896246230775245
TCHH	151714417969523	-168484633406962	0.249571112864902	-675096694777196	1468.63	8874.41	0.928448540372894
TCIM	236481550976481	-225042289515721	0.18936668937216	-118839427494795	1.43439e-18	5.76739e-17	0.995031561367341
TDO2	119096102429212	-180776019622673	0.26953110217417	-670705600075262	1985.9	9936.37	111379738450868
TECTA	403151309591923	-106134141557428	0.162222114820724	-654251990702501	6049.08	42115.7	0.740277061123834
TEK	313649362642012	-13685947484613	0.199934438968622	-684521763994889	76.3597	4887.32	0.90593063721884
TENT5A	138569576694968	-139875013906686	0.14837562516593	-942708842845737	4.2163e-08	5.21896e-06	121207511092582
TENT5C	565327132236918	-115929070580474	0.187488296827433	-618326970494467	62787.3	307009	0.946377764541293
TERB2	208943834150023	-130689444555941	0.397662812799215	-328643866988709	0.00101462865748667	0.00222998313197552	0.922866740464942
TEX26	239304879182853	-379836772912751	0.472199221453293	-804399405284328	0.0869567	0.320987	250720538287654
TF	372997389018295	-103355372233408	0.192710312270993	-536325072672124	8.17374e+06	2.64609e+07	111379738450868
TFPI2	140825455897601	-199287759761997	0.263682920422408	-755785621013097	4.09767	33.9001	0.896246230775245
TFR2	379626098622345	-102532945620013	0.176530120445927	-580824084643503	631327	2.3354e+06	111379738450868
TGFBR3	122308564513382	-114661930587197	0.175051458488991	-655018424735995	5746.61	2548.98	118876714947973
TH	827213968415814	-197599569374375	0.427573391213159	-462141876541297	3.81125e+07	1.17767e+09	0.926079317758803
THBD	554728506729314	-125090082392183	0.176747772557123	-707732157426508	146.967	966.702	0.946377764541293
THBS1	604604667343268	-165915690749463	0.218079782148207	-760802716854819	2.78311	3.11452	0.6669467798541
THRSP	322889699930156	-153763762235686	0.396757464581096	-387551025405488	0.000106401498732902	0.000253805123655974	0.995031561367341
TIMD4	774344440385216	-344240958105458	0.318100946820149	-108217520741957	2.71536e-15	9.30527e-13	0.740277061123834
TJP2	302130093689512	-104031852260159	0.106808344339804	-974004914159023	2.03456e-08	3.4145e-07	0.995031561367341
TKFC	846268558235486	-108385021717588	0.195190774693005	-555277378698125	2.81172e+06	1.56023e+07	0.6669467798541
TLCD4	574997377317829	-140000814027147	0.158686057263306	-882250252111601	0.00011193	0.00137362	0.95943424924746
TLR3	393686838765549	-117095250238527	0.160506523250099	-72953577130364	29.7867	232.939	0.864675952044456
TLR4	39583654675832	-147489460784899	0.154880493113515	-952279127086724	1.68589e-07	2.65786e-06	0.972157883339661
TM6SF2	81713822390295	-113127037088756	0.216931022443976	-521488516553561	1.83931e+07	5.30074e+07	119634206973591
TMEM132C	426019977069581	-187577486843608	0.53186148855192	-352681084983834	0.000420597121141205	0.000523494999906689	181201088751161
TMEM132E	342032429231602	-147798319125184	0.263223456428345	-561493725257793	196634	8.40977e+06	0.896246230775245
TMEM154	173761106865157	-175831840378179	0.262052232296186	-670980128035866	1948.9	8956.29	122009024194229
TMEM220	213726416378178	-149605968978634	0.16083814098171	-93016474864408	1.38286e-06	1.75189e-05	111379738450843
TMEM235	0.336072004886031	-146347293080487	0.57254166170398	-255609858407392	0.0105853124504148	1	0.00845978674471172
TMEM25	393445509191841	-105829263802964	0.205787932080514	-514263702118156	2.70909e+07	9.30539e+06	0.972157883339661
TMEM256.PLSCR3	307809635907005	-119524103025551	0.186668263140621	-640302218570016	15233.1	44383.8	176514789994648
TMEM26	44335310900466	-218793256548503	0.17657310261979	-123910863717236	2.9206e-21	1.90844e-19	0.740277061123834
TMEM45A	195700580470088	-118652667483805	0.269043374999587	-441016871290687	1.0329e+09	3.23116e+09	0.862329573726731
TMEM47	850134486956561	-105583128516954	0.182389208267858	-578889121344798	708526	2.53156e+06	114845450627745
TMEM71	322363649503521	-111058710624998	0.150698357530305	-736960325547436	17.1137	158.109	0.745029512844227
TMEM82	994444712330083	-173241369977925	0.283279892194346	-611555478350265	96221.6	367231	119634206973591
TMIGD3	148595344603969	-121767271302845	0.199116813558374	-611536861838877	9633.4	498260	0.864675952044456
TMPRSS2	191381855803006	-128320106446097	0.168171295383323	-763032158095764	2.34169	16.1695	111379738450843
TNFSF11	662355590059286	-119584087253433	0.29226868318309	-409158059464484	4.28443e+09	0.000142384233990146	0.740277061123834
TNR	443167576223813	-162849645721034	0.438060367682422	-37175160716455	0.000201191191436993	0.000496441718386896	0.916910653286286
TNXB	438792229601927	-13779626989768	0.228582537759568	-602829381667899	165700	766037	0.947962011920702
TPO	129700954994699	-108646676393786	0.337381867704613	-322028795243107	0.0012806189332992	0.00109060835613138	250720538287654
TPPP2	902733416461969	-21427498484694	0.249470323190908	-858919738853931	0.000875789	0.0118802	0.794886437342711
TRAPPC3L	324761587566694	-181779228811632	0.221407608577451	-821016179071567	0.0220891	0.121742	176514789994648
TREH	236710989018444	-106166999837265	0.303483148997617	-349828318929494	0.000468263639263796	0.00110267664873382	0.90593063721884
TRIB1	582798751070115	-198591525169203	0.142832079194269	-139038461310287	6.00271e-30	4.46539e-28	111379738450868
TRPC5	247509169629439	-108214664294313	0.353282437585407	-306312040400118	0.00219041907867475	0.00562660265077885	0.740277061123834
TRPM8	120811929491325	-14733020590856	0.250656453633711	-58777742911761	415819	1.4796e+06	118876714947973
TRPV4	374664037050779	-126958897000939	0.261951841239486	-484665030030724	1.25563e+08	4.22091e+08	0.90593063721884
TSC22D2	120140291344152	-100086381120086	0.0976781131666511	-102465514407845	1.22641e-10	2.07892e-09	118876714947973
TSLP	125176127093913	-233283209731862	0.279909825583766	-833422725498606	0.0078006	0.0886628	0.864675952044456
TSPAN11	447386958867511	-11043428942354	0.250901943104048	-440149199553004	1.07509e+09	3.8542e+09	0.745029512844227
TSPAN7	629125874050814	-104794172699905	0.161230191264795	-649966187336447	8050.07	36198.7	115299650756476
TTC36	115996792363148	-276163724514563	0.347218320235986	-795360464640431	0.181162	2.16912	0.709370283899155
TTC39B	454115945209695	-115888502505838	0.14967924650519	-774245629983312	0.975143	0.00679854	115299650756476
TTPA	275304994595675	-105848119894546	0.217156732229817	-487427301045067	1.0921e+08	3.4415e+08	0.978648097738888
TTR	125545624562911	-149250679527593	0.250333655755846	-596207006512776	249062	966752	111379738450868
TUBB1	872718416325204	-104025197909132	0.187123862653072	-555916260140458	2.71072e+06	1.10668e+07	0.922866740464942
TUBE1	570645918206413	-180521736908129	0.136422231870047	-1323257466423	5.69041e-26	3.921e-24	0.947962011920702
UGP2	143685642169122	-112023212092528	0.136220161605533	-82236880922903	0.0197339	0.169428	111281493908931
UGT1A1	414157293657292	-130644024233376	0.285560714130904	-457499991310034	4.7622e+08	1.3566e+09	0.995031561367341
UGT2A1	124513414588738	-121136272981913	0.410711774616882	-294942294008762	0.00318367957295386	0.00687418391855527	0.864675952044456
UGT2B10	11476580261686	-160625362506563	0.262073353144101	-612902306089252	88420.3	362726	111379738450868
UGT2B7	173013669819576	-180858231196442	0.254312143304352	-71116632043794	114.653	65.9306	111281493908931
UPK1B	724982716970225	-121149383418695	0.494305091556656	-245090300480567	0.0142498346240363	0.0257736486528238	0.922866740464942
UROC1	301700186675686	-228802621651853	0.342570183399701	-667899988788261	2405.78	11909.4	111379738450843
USH2A	519264650815386	-123421541380473	0.272998324894276	-452096332196435	6.15589e+08	1.81434e+09	0.945542994669583
USP38	124015627567217	-100229897444577	0.0991608719124371	-101078071936563	5.10133e-10	1.34341e-08	0.709370283899155
VIPR1	31883761887195	-347076376244852	0.246484153110917	-140810827740584	4.96433e-31	4.83428e-29	0.900484214151191
VKORC1	335398839949132	-101800325032315	0.129743467237878	-784627751975127	0.428568	3.1947	111379738450843
VMO1	157547099122279	-139222152507446	0.154969319039968	-898385263418109	2.61448e-05	0.000271627	122009024194229
VNN1	718595867454828	-144845444243375	0.283500115836044	-510918465822226	3.23552e+06	9.66635e+07	111383846496267
VNN3	824777407738462	-100560748180186	0.247551598387714	-406221364899809	4.86096e+09	0.000103150164487191	118485111424296
VSIG4	501497909137705	-189142700470402	0.213504445580029	-885895841449842	8.07655e-05	0.00101822	0.945542994669583
VSTM1	132348016193225	-163811677675571	0.305296039377624	-536566664964005	8.06508e+06	1.36725e+07	22004558832929
VWA2	466207722050365	-118222706946483	0.353738910679022	-334208941616142	0.000831502701805442	0.00184501777141128	0.92693109113931
WDR17	582265384150657	-169130451897541	0.23261693622863	-727077119317353	35.7441	260.252	0.922866740464942
WDR72	128333796681258	-130051699880254	0.268716505665083	-483973619552588	1.30012e+08	5.50033e+08	0.709370283899155
WEE1	16330097333903	-116943737539612	0.128349865723805	-911132527331681	8.13817e-07	9.67708e-06	111379738450843
WFDC1	920615443030711	-106390583699116	0.215154072569792	-494485567613898	7.62003e+07	1.9986e+08	121585773816799
WNT11	234098556243156	-147782984280457	0.275769780546327	-535892598484446	8.37181e+06	3.27792e+06	0.90593063721884
WNT2	279655654347224	-175438004879029	0.430668379317284	-407362168444178	4.62876e+09	0.000135618456627936	0.843887822532013
WNT7A	609707956041678	-148050590577422	0.425568746654769	-347888776469583	0.000503499413486343	0.00115356289449433	0.928448540372894
X.122	116883225688842	-119377765201643	0.20487145422046	-582695942955441	564463	2.4974e+06	0.928448540372894
X.135	201904278990369	-127446727129386	0.286279654218257	-445182622137101	8.51431e+08	1.36616e+09	176514789994648
X.141	571478414082048	-135948191187425	0.156782041217339	-867115838854065	0.000427746	0.00634023	0.745029512844227
X.143	491091377925822	-140601527826241	0.209346707649258	-67162043962882	1865.19	1126.12	0.916910653286286
X.161	0.60911086888563	-106430874763718	0.318636686771656	-33401952500212	0.000837195079941049	0.00079832925317413	229346620018431
X.192	0.562972826993108	-119174203615838	0.418033453667095	-285082934321194	0.00436053660812095	0.00475166660732669	176514789994648
X.224	341894259380636	-14129893051508	0.267115391398622	-528980863945113	1.22444e+07	1.79668e+07	250720538287654
X.229	0.645102628595923	-125478888421711	0.313327407761648	-400472111003976	6.20907e+09	8.7101e+09	181201088751161
X.305	586896420373772	-12268559089738	0.303201019889025	-404634492793869	5.20236e+09	0.000138256926541252	0.928448540372894
X.324	244334118786999	-251329296380953	0.23587601520397	-106551442359928	1.64989e-12	4.6012e-11	0.843887822532013
X.84	395789564761055	-14569536250169	0.21253421216402	-685514868492099	712.384	1874.03	229346620018431
XCR1	305643075652748	-104665673360209	0.287858019027711	-363601728774952	0.000276885757727153	0.000811028593151243	0.745029512844227
XDH	330238320690707	-127887701239403	0.233877467446804	-546814973821673	4.54758e+06	1.71379e+07	0.978648097738888
XG	435035662679343	-123011363711911	0.325609492698081	-377788014386829	0.000158168963229197	0.000428345177401649	0.843887822532013
YPEL2	126069534584521	-105601563046906	0.11668208381399	-90503665682944	1.42489e-05	1.55741e-05	118876714947973
ZADH2	117246199782192	-106086272051242	0.0913324247859643	-116154008064335	3.44171e-17	1.06512e-15	118876714947973
ZAN	259695303806832	-148507938671426	0.318666826320732	-466028862765763	3.15766e+08	4.35972e+08	22004558832929
ZBTB21	672023676123407	-143724147758609	0.11999999944659	-119770123684525	4.6892e-19	1.69038e-17	116063127897958
ZC2HC1C	196980666110221	-140583639913073	0.121062318640057	-116125018496512	3.56043e-17	1.07525e-15	121585773816799
ZCCHC24	190544219607887	-11002200772741	0.108420156422448	-10147744788222	3.39109e-10	5.87037e-09	111379738450843
ZDBF2	125117824945936	-113533213761483	0.246203979802984	-46113476253444	4.00067e+08	9.52502e+08	121585773816799
ZEB2	633777900192431	-114644226637825	0.156983063221543	-73029678670515	28.1488	202.553	0.946377764541293
ZFP1	390698868290314	-171330361751007	0.128124762210961	-133721506127681	8.79603e-27	6.65986e-25	0.896246230775245
ZFP36	752071937790226	-215750929849552	0.149491434578311	-14432327207117	3.23963e-33	3.35981e-32	0.95943424924746
ZFP36L1	110689117261807	-110243486516903	0.0961780528953833	-114624369279777	2.03701e-16	7.26787e-15	0.95943424924746
ZFPM2	907808358650433	-135298457142858	0.183537497872935	-737170652923066	16.8458	13.5116	0.864675952044456
ZG16	708314424417462	-174706452455225	0.288418173564611	-605740097081944	138338	537338	114845450627745
ZNF330	107004728437786	-101586151983259	0.08799633799906	-115443613101654	7.88248e-17	2.36688e-15	118876714947973
ZNF536	136613477671997	-105356024367058	0.414965860120844	-253890824503916	0.011119898248229	0.0113033164095457	176514789994648
ZNF878	678364538399868	-11507950896126	0.255361597526032	-450653152534138	6.58959e+07	1.97468e+09	0.926079317758803
ZPBP	0.381605453324214	-24572073220418	0.558756236667696	-439763739675832	1.09436e+09	0.00260569963319336	0.00843043967012994

## Sheet: mRNA_upreg
Gene_id	baseMean	log2FoldChange	lfcSE	stat	pvalue	padj	weight
2002-01-01	613183314876566	216147251133866	0.405492693579986	533048448359351	9.79511e+06	4.60662e+07	0.740277061123834
AACS	677639414769785	100738554452327	0.127632190442908	789287985286037	0.295292	2.24488	111379738450843
AANAT	460128657418492	164854134999819	0.296060674477096	556825506430347	257303	1.04991e+07	0.926079317758803
AATK	140870355722516	133082389988126	0.251238390516669	529705630236061	1.17684e+07	3.41318e+07	122009024194229
ABCA12	693898141342923	14218308896441	0.351227742679418	404817364026358	5.16188e+09	0.000138836226130977	0.916910653286286
ABCA3	394001661130194	139933031605072	0.207639799023612	673922014291488	1592.39	9857.7	0.900484214151191
ABCA4	110958301560217	116771163404867	0.203325935084601	574305306188709	929846	309974	121585773816799
ABCB5	252735338822794	532156083161047	0.561909815695359	947048918343787	2.78536e-07	5.61873e-06	0.740277061123834
ABCC10	607714308201084	13655072887966	0.0981290132007337	139154287224239	5.10529e-30	4.46539e-28	0.946377764541293
ABCC12	235326332301331	163725067297167	0.533896312099566	306660794590082	0.00216502619064791	0.00247291259809939	176514789994648
ABCC4	544918452343243	160256980717498	0.224159183263842	714924895710701	87.254	491.637	115299650756476
ABCC5	688576805021269	10956842213742	0.0933032160229662	117432631808158	7.64776e-18	2.4602e-16	119634206973591
ABCC8	164952949318926	191619117372723	0.343853616550595	5572694546446	2.50829e+06	1.0225e+07	0.928448540372894
ABLIM2	231235227074973	146579690408454	0.201244274794534	728367008493082	32.4859	252.801	0.864675952044456
ABRA	0.756273176826695	102445362152248	0.466202853381952	219744176615573	0.0279889111601615	0.0207634153043582	229346620018431
ACAN	768280663150542	363469508315467	0.319089044185003	113908488849506	4.64443e-16	1.69824e-14	0.896246230775245
ACBD6	136048705361064	108592822716254	0.0903542705510708	120185600585281	2.83875e-19	9.95691e-18	121940613765583
ACBD7	849131587845597	161805780913419	0.270339445881463	598528196230629	216015	1.01509e+06	0.916910653286286
ACE	302491288390114	100922987665001	0.152010570640276	663920852608527	3153.72	18705.3	0.90593063721884
ACLY	421874050224285	105124884031123	0.0928130895669537	113265148829344	9.69875e-16	3.05796e-14	0.998495350515408
ACP4	150547469189562	367992490029581	0.404510014716046	909724052908554	9.2656e-07	0.000131512	0.926079317758803
ACP7	220305512179009	115798626895011	0.401583489158635	288355049500721	0.00393219599129411	0.00420950331626148	181201088751161
ACRV1	519338498555254	188479836651582	0.282223145680483	667839755655504	2415.69	14211	0.926079317758803
ACSBG2	311210173034945	207940542218539	0.34287718148129	60645780311247	132301	279705	22004558832929
ACSL4	123512674877565	217908070714693	0.270728249269855	804895947513361	0.0835009	0.672102	111281493908931
ACSL6	659418995908105	134012602450283	0.282661903525115	474109177002607	2.1257e+08	5.55218e+08	114845450627745
ACSM1	195946334825548	125393542903692	0.321931177593796	389504191053873	9.81818e+09	0.000222000604804158	105912715634988
ACSM4	313854087732258	124617096605124	0.32804695357006	379875792928253	0.000145423039326943	0.000198511418485332	176514789994648
ACSM6	318394174861022	124216742647028	0.34021462236327	365112886048719	0.000261090192668659	0.000247625881304792	250720538287654
ACTA1	123271793393222	125573571320335	0.233335498497658	538167454711547	7.37961e+06	2.85238e+07	0.926079317758803
ACTBL2	127938356590818	123952440909359	0.568651238599335	217976208430797	0.0292751018219152	0.0199424890881191	250720538287654
ACTC1	762065107771677	139598981341438	0.413454541076347	337640459766193	0.000734398360688201	0.00164443732873041	0.926079317758803
ACTG2	279394322271325	190122759116352	0.212522470975505	894600736776986	3.68572e-05	0.000468519	0.972157883339661
ACTL6B	741435733228027	141484216262636	0.289771050972439	488262080659302	1.04685e+08	3.48338e+08	0.926079317758803
ACTL8	378894156313334	64925768349345	0.65915127195103	984990412855768	6.86094e-09	1.58914e-07	0.740277061123834
ACYP1	116594889524437	113467346237934	0.105446589859983	10760646350783	5.27985e-13	1.50917e-11	0.864675952044456
ADAM11	370690226883015	231008011870281	0.259868880575491	88894065098793	6.14362e-05	0.000825848	0.896246230775245
ADAM12	116867196024787	190312633952175	0.284058347835982	669977261369073	2087.44	13208.3	0.864675952044456
ADAM15	367681032391669	133260597925538	0.117104684757679	113796128823787	5.28337e-16	1.73109e-14	0.998495350515408
ADAM21	877919890795005	160846992311857	0.285582944151523	563223384329687	1.7789e+06	7.4268e+06	0.926079317758803
ADAM22	682255014440125	172212078249136	0.246535358401877	698528922445331	284.27	1871.09	0.916910653286286
ADAM23	108794304299537	268742157989482	0.329890448685479	814640614968829	0.0374899	0.397628	0.864675952044456
ADAM32	840656807796023	17473791138516	0.318268043779234	549027509360528	4.01308e+06	1.59874e+07	0.928448540372894
ADAMDEC1	646967008591525	238007899506572	0.325593490166756	730997107419666	26.72	242.002	0.745029512844227
ADAMTS14	539438674700777	147522333118697	0.235682863600504	625935763275329	38656.6	20010.7	0.916910653286286
ADAMTS16	155047404724955	370161092639084	0.392364015480642	94341243853782	3.94273e-07	4.88423e-06	121585773816799
ADAMTS18	131785579241678	316230249824888	0.397442764492403	795662364689828	0.0176797	1.64461	0.922866740464942
ADAMTS19	15410961243472	192696754457364	0.770293960105486	250160022585373	0.0123633442594867	0.0097847480615328	229346620018431
ADAMTS6	35637076548473	12968447824781	0.220964947359232	586900681749204	438413	243537	0.740277061123834
ADCK5	687300699930664	100713735076883	0.123742669898574	813896573909656	0.0398669	0.330631	111379738450843
ADCY6	131927939071022	11695746933955	0.0915430161879542	127762306956782	2.22599e-23	1.00448e-22	121940613765583
ADCY8	33678746473385	235665136241947	0.578580913922275	407315779990637	4.638e+09	0.00015252586372981	0.745029512844227
ADGRB1	269250268064317	100411922494612	0.271263073102905	370164362388243	0.000214207346903322	0.000643381913117096	0.740277061123834
ADGRB2	320795843962463	204939569388742	0.275906975756885	742785023200442	11.0377	10.4139	0.745029512844227
ADGRF1	127985342167673	141404309243376	0.510313932166013	277092786087947	0.00558968091356102	0.0108438174597693	0.928448540372894
ADGRF4	514461013034279	18100372486304	0.58240521775826	310786578389085	0.00188443627122652	0.00400082028839318	0.916910653286286
ADGRG1	114542724217167	107925683583088	0.202093988986157	534037079106198	9.27567e+06	4.55569e+07	0.709370283899155
ADGRG2	233639967561734	143109607318955	0.30652837944418	466872292798636	3.03078e+08	1.01099e+09	0.864675952044456
ADGRG5	30786377104353	114674781000149	0.289167936035733	396568107004709	7.31867e+08	0.000203739981565392	0.864675952044456
ADGRL1	487103289673843	186132712262855	0.238203064311405	781403517208836	0.553856	4.78267	0.945542994669583
ADIG	553949704515805	244290978206425	0.457170469783408	534354238413872	9.11475e+06	3.47448e+07	0.92693109113931
ADIPOQ	149855989638078	200938646126954	0.781055398211976	257265549392465	0.0100921609923666	0.0100894671306436	181201088751161
ADM2	738270850740903	21936863616371	0.205366936246942	106817893947607	1.23861e-12	2.61179e-11	114845450627745
ADORA1	135872799811196	156110546533957	0.311468331039936	501208408613267	5.38437e+07	2.14907e+08	0.794886437342711
ADRA1D	374572289045647	202275704223557	0.394237118962135	513081327187219	2.88493e+07	1.04141e+08	0.916910653286286
ADRA2C	252796031143252	333252111035047	0.30062861882441	110851758670951	1.48059e-15	4.69846e-13	0.90593063721884
AGO2	123986227552027	102260662678155	0.109135628267262	937005305249442	7.24961e-07	1.45163e-05	0.709370283899155
AGPAT4	198634425636347	136461188102413	0.200879399857595	67931897546066	1096.81	718.995	0.864675952044456
AGTR2	0.719603321767599	148974276407864	0.755857118243886	197093171198786	0.0487316872588056	0.0359444894101691	22004558832929
AHNAK2	225071633760861	176123982182704	0.329572355107423	534401564491951	9.09097e+06	3.58011e+07	0.896246230775245
AICDA	116776405190453	110525635664939	0.555695594403346	198896008494742	0.0467056088524462	0.0413011261846571	181201088751161
AIF1L	405412411110895	119381773102362	0.19541873747039	610902386576166	100242	462985	0.972157883339661
AIFM3	943436529411571	127520363460693	0.190601737072305	669040930158565	2225.47	10197.3	121585773816799
AIRE	459996111872208	291655999488038	0.462449684698361	63067617762195	28493.4	147980	0.926079317758803
AJM1	228547474206037	190259068921965	0.149141436732055	127569556181614	2.85128e-23	1.72098e-21	0.896246230775245
AK8	31362850858747	1828782869987	0.28988568294238	630863467082816	28150.8	150911	0.896246230775245
AKAP14	257223500089613	298019376078807	0.482415862099152	617764463179187	65065	176133	176514789994648
AKNAD1	124432526875039	106714342517012	0.402949532349363	264833022375836	0.00808904677451149	0.00821868424974109	181201088751161
AKR1B10	255667656509629	363682783463398	0.369925423906039	983124597447981	8.25905e-09	1.27829e-07	111379738450868
AKR1B15	269349675144541	388484210805563	0.417024284304017	931562562247219	1.21236e-07	1.89893e-05	0.896246230775245
AKR1C2	15154828360689	103226334144622	0.241182234513891	428001400487385	1.86882e+09	5.11782e+09	0.95943424924746
AKR1C3	162284481341671	160831437498714	0.143429358309528	112132857173935	3.5092e-15	9.59726e-14	111281493908931
ALDH3A1	555299555598941	513228456131123	0.457995893099922	112059619717845	3.8119e-15	1.03666e-13	111379738450868
ALDH3B2	977344715414798	16472939903628	0.578790726736454	284609603137763	0.00442588454442826	0.00875503742478755	0.926079317758803
ALDOA	184237559336566	113782431504612	0.14980394449415	759542293020563	3.06789	34.0936	0.6669467798541
ALKBH6	124645534677622	122906295242152	0.119565487050659	102794124185751	8.72579e-11	2.03566e-09	0.864675952044456
ALOX15	101647378284379	108017139546221	0.262221459581511	4119309675059	3.80009e+09	0.000104080087305627	0.916910653286286
ALPG	130668526007343	205365580054146	0.723680242281769	283779448512547	0.00454264210045095	0.00401670928617874	22004558832929
ALPK3	76803260474322	207215043922465	0.223983405692288	925135696021788	2.2166e-06	2.59773e-05	118485111424296
ALPP	10967847731697	15633035491544	0.557079738385887	280624736717942	0.00501221983236717	0.00440602922548658	22004558832929
ALS2CL	135793354626509	140747028283968	0.173743649208825	810084448697185	0.054579	0.447265	111379738450843
ALX1	390986798689767	413040242836087	103356856114235	399625393384234	6.43527e+09	7.22898e+08	229346620018431
ALX3	805166993941657	498689721834814	0.71735770082776	695175811536387	360.762	2324.07	0.92693109113931
ALX4	167990482895754	177092509509981	0.439582496557416	402865243490991	5.60975e+09	8.12021e+09	176514789994648
AMBN	550990938894371	444853730157464	0.760547355399014	584912598800736	494163	2.21141e+06	0.922866740464942
AMH	281304514392898	247755857318867	0.321469204156981	770698574280484	0.128824	11.9171	0.843887822532013
AMIGO3	157322501927926	101782510849217	0.309411744594836	328954904354059	0.00100348067046965	0.000869084617573111	250720538287654
ANGPT2	323010802551877	104317744277151	0.166449213281273	626724165411764	36750	1949.13	0.896246230775245
ANKFN1	712075708774627	693429617134008	0.708183672914165	979166342935521	1.22268e-08	2.79456e-07	0.740277061123834
ANKLE1	169973292331318	115421793386001	0.201811303029497	57192928073573	1.06968e+06	4.58072e+06	0.92693109113931
ANKRD1	12508289993564	180333065554708	0.333697610565874	540408620993434	6.51396e+06	2.70921e+07	0.864675952044456
ANKRD13B	103919136528588	173393843739006	0.173863489571368	997298766788127	2.00117e-09	4.16931e-08	0.864675952044456
ANKRD2	147020736157634	143849496871562	0.309273125026749	465121231788634	3.29989e+08	1.03043e+09	0.922866740464942
ANKRD22	93161197118081	126766779700496	0.337948942605917	375106306659818	0.00017608639744399	0.000463528109248402	0.864675952044456
ANKRD23	27571670793149	118139656710433	0.136540817307426	865233261673234	0.000504573	0.00658623	0.843887822532013
ANKRD29	370075155897275	1683258639224	0.203511980832703	827105427570738	0.013278	0.132471	0.972157883339661
ANKRD33	209743504959977	4357993158501	0.565988585389219	76997898385249	1.3629	11.6225	0.916910653286286
ANKRD34A	284608467088578	110980558720299	0.14044812936524	790188941795658	0.0274707	3.07464	0.745029512844227
ANKRD34B	362422058691362	222259423708758	0.556516976316062	399375819907658	6.50342e+09	6.71607e+09	250720538287654
ANKRD34C	0.973920525623594	15797968959796	0.626558840066185	252138633270695	0.0116893434766598	0.0118368111113686	176514789994648
ANKRD45	144476455599208	182414091472897	0.287626113110605	634205599415621	22671.9	119095	0.92693109113931
ANKRD52	137134516160468	142839439275393	0.0997143464228462	143248634122989	1.53029e-33	1.21105e-31	121940613765583
ANKRD65	330905381638995	250499948194037	0.279839768860452	895154928172321	3.50528e-05	0.0004827	0.896246230775245
ANKRD7	233068051770778	273286463523491	0.549878348156663	496994406925859	6.69722e+07	1.2124e+08	181201088751161
ANKS1B	610749784081663	26632342803717	0.305197419775512	872626735288469	0.000263216	0.0035297	0.843887822532013
ANKS3	498195980049272	107961098615036	0.104721469470288	103093567308724	6.39278e-11	1.37394e-10	0.945542994669583
ANKS6	517138393074777	138689954520506	0.210391989420773	659197885348824	4340.02	24247.4	0.947962011920702
ANLN	494101426099471	36357047779475	0.204166242331592	178075706170987	6.17317e-57	2.12504e-54	0.945542994669583
ANO2	493880604087983	306814273888767	0.304672503408791	100702974655085	7.47517e-10	1.85449e-08	0.745029512844227
ANO4	120249139088547	182667027979573	0.311282968886639	586819859219782	440555	1.98475e+06	0.922866740464942
ANO9	212255293531564	164735726471149	0.274110731723195	600982403846573	185725	890726	0.90593063721884
ANXA13	124142427679324	111889908137023	0.309581053670981	361423629806292	0.00030123423559171	0.000568360656098606	118876714947973
ANXA2	14256353129498	118121100022925	0.138167427582597	854912782915582	0.00124022	0.0195783	0.6669467798541
ANXA2R	101307383628601	153552390227896	0.165877683162015	925696496965894	2.10326e-06	3.61148e-05	0.794886437342711
AP1M2	799699863082649	311981042597543	0.391126591838378	797647230097975	0.150575	1.17528	111379738450843
AP3B2	102983924003818	142734679937154	0.39611640081719	360335193500426	0.000314139727694013	0.000744400459150648	0.92693109113931
AP5Z1	16432618786824	11333043595028	0.0869284019644553	130372160754341	7.51513e-25	4.33961e-23	105912715634988
APC2	128541159791786	104990745544931	0.132808937637094	790539758941696	0.26708	1.87084	122009024194229
APCDD1	468923523092401	11222586240587	0.346664449812271	323730519430659	0.00120664290871955	0.00212987707099653	115299650756476
APELA	246132287268276	310555922298829	0.783639414763198	39629951792646	7.40153e+09	0.000102713959685947	181201088751161
APLN	359643172442119	38947971307712	0.219673651851289	177299239027894	2.46368e-56	8.51444e-54	0.896246230775245
APLP1	156524977311146	270858323388934	0.306650140157101	883281263951712	0.000102076	0.00138827	0.864675952044456
APOBEC2	676106057487071	162578049777668	0.28452267245789	571406307881246	1.1031e+06	4.7054e+06	0.928448540372894
APOBEC3B	172826947135235	188890763934876	0.253488633701764	74516462997355	9.21826	54.8601	121585773816799
APOD	105963897997891	117370740790927	0.256088394492905	458321202033929	4.57887e+08	1.44368e+09	0.896246230775245
AQP10	22748415154019	411153885531604	0.548969000454886	748956471478197	6.91024	54.0131	0.926079317758803
AQP5	739611311956994	180911976904768	0.326712748165617	553734061252671	3.07099e+06	1.24643e+06	0.922866740464942
AQP8	16489663887515	410427171874789	0.401069338861187	102333220744366	1.40611e-10	2.31827e-09	121585773816799
ARFGEF3	364358235336284	2972777168997	0.298118940505104	997178228246825	2.02561e-09	3.77489e-08	0.972157883339661
ARG2	188174938796905	124745218944275	0.260523725098901	478824793776148	1.68244e+08	4.20004e+06	122009024194229
ARHGAP11A	345172136719961	254711923585777	0.16693363364599	152582746821372	1.45033e-38	2.16294e-36	0.900484214151191
ARHGAP22	750501122208412	14314864282226	0.175591848839237	815235124913571	0.0356916	0.358357	0.916910653286286
ARHGAP28	629215278276756	132583853847304	0.250738125807997	528774207831602	1.23835e+06	4.69352e+07	0.916910653286286
ARHGAP33	256485878682602	15583991716088	0.136057865486794	11453943996792	2.24685e-16	8.45984e-16	0.90593063721884
ARHGAP36	66859770168146	229000473871741	104596621757376	218936778286142	0.0285701193243869	0.0491240075741109	0.916910653286286
ARHGAP39	18704902846491	156345228946177	0.145228911337449	107654342035862	5.01247e-13	1.03537e-11	122009024194229
ARHGAP4	132178494251915	107961345940842	0.17446479359941	618814511016666	60876.3	234693	121940613765583
ARHGAP40	151534201784324	264574775091955	0.492691589283775	536998765244941	7.8742e+06	3.03497e+07	0.926079317758803
ARHGDIG	333599950103833	190312024596593	0.431765723500179	44077612982753	1.04445e+09	1.61712e+09	181201088751161
ARHGEF11	232757153656684	11406203082542	0.101058275909676	112867580412085	1.52561e-15	5.48871e-14	0.862329573726731
ARHGEF16	693207658720898	104210192933322	0.235149480435187	443165737557499	9.35115e+08	2.177e+09	118485111424296
ARHGEF2	125392521886808	104843299939332	0.145043337061281	72284120086837	48.8674	449.366	0.709370283899155
ARHGEF37	403855442337936	145199528056323	0.200202304002099	725264021211266	40.8725	313.777	0.864675952044456
ARHGEF39	218457652262955	294407526834753	0.153102178098811	192294799780539	2.0972e-68	1.70987e-65	0.90593063721884
ARID3A	783984376614923	252910971154245	0.242329524172727	10436655294795	1.68648e-11	3.14953e-10	116063127897958
ARL16	936329352944356	118538707749844	0.115128214851797	102962343246994	7.32737e-11	1.25807e-09	118485111424296
ARL2	908909365318446	102215556128014	0.149768217700161	682491637395666	879.765	4595.23	111379738450843
ARMC12	246591761314308	105168725830584	0.191680097870556	548667947267045	4.09559e+06	2.00815e+07	0.745029512844227
ARMC3	267397650088779	148691978165371	0.486488524477353	305643341382234	0.00223987224142903	0.00199757577095116	229346620018431
ARMC9	137289626473014	104932729029918	0.154315369214388	679988840801312	1047	4985.53	121585773816799
ARMH2	209107832002685	153718422313537	0.462642599899388	332261712058004	0.000891772259047731	0.00107985934065208	176514789994648
ARMS2	237070871946251	129050939802439	0.346559677887931	372377249970121	0.000196267801293668	0.000263390120644835	176514789994648
ARNT2	210865460456618	109316854813753	0.302135655157863	361813817560314	0.000296729972151922	0.00075265158314376	0.864675952044456
ARR3	630962656087445	136074172881968	0.217228231410458	62641108845955	37495.9	192476	0.92693109113931
ARTN	193481783919338	179062132290506	0.22762776079526	786644527297194	0.36486	3.25994	0.928448540372894
ARX	220299967362247	247294156388904	0.623204411982189	396810663779401	7.24459e+09	0.000103171914247765	176514789994648
ASB11	458166145129694	155359194371604	0.441768781894248	351675357650769	0.000436859153578315	0.0010132141540683	0.92693109113931
ASB15	324162016570291	263514261554659	0.487736532831018	540279933563961	6.56088e+06	1.38601e+07	176514789994648
ASB16	38519481589144	20873043564022	0.17619850263877	118463228979956	2.24842e-18	1.05281e-16	0.843887822532013
ASB5	0.88078596221934	111843253175789	0.526665728603758	212360985538771	0.0337027807640467	0.0226862870881565	250720538287654
ASCL5	289338093680546	21786997787004	0.411391054375963	529593377280713	1.1841e+07	1.89396e+07	229346620018431
ASF1B	39638844467744	298957243048082	0.187173207536004	159722241758653	1.99542e-43	3.54624e-41	0.900484214151191
ASIC1	134995806909855	334411368267737	0.291731388628762	114629889447133	2.02407e-16	7.71708e-15	0.896246230775245
ASIC3	679621371703039	200571743197007	0.185976268568374	107848030687457	4.06112e-13	1.13601e-11	0.896246230775245
ASIC4	214879971611183	181595785125402	0.402816229965796	450815462775225	6.53939e+08	7.67642e+08	250720538287654
ASIC5	458934220372754	152175332271607	0.328213046840911	46364802903575	3.54392e+08	1.09801e+09	0.926079317758803
ASNS	446104716334916	175357070605726	0.241440171875828	726296163738283	37.8705	222.569	115299650756476
ASPHD1	30133710680938	277950843070988	0.331159882873647	839325224598656	0.00472876	0.0524271	0.90593063721884
ASPM	826733633408692	371907886709122	0.193649146441503	192052427569809	3.34556e-68	2.05023e-65	116063127897958
ASPSCR1	441250610496868	121349891296391	0.174283601543013	696278308584537	333.615	1812.28	111379738450843
ASRGL1	31609295917212	121862926760249	0.211785276148424	575407927200968	871153	3.6077e+06	0.972157883339661
ASZ1	0.955170344995364	17729433870469	0.845136600089316	209781872759923	0.0359211615233507	0.0261162223588153	229346620018431
ATAD2	207302234595235	170933518504393	0.150124833332831	113860921414266	4.90498e-16	1.85142e-14	0.862329573726731
ATAD5	132751176758461	16481280290132	0.144587391731466	11398836435712	4.23745e-16	1.56276e-14	0.896246230775245
ATAT1	303012895469297	108596171967578	0.11021965887033	985270441594624	6.6724e-09	1.27082e-07	0.90593063721884
ATF7.NPFF	415196570611087	101385441671869	0.143004098052392	708968785179323	1.34415	93.6053	0.896246230775245
ATP10A	160236373192683	134843912740197	0.255432234162573	527904840132176	1.29857e+07	3.74824e+07	122009024194229
ATP1A2	122819090527548	146567173816373	0.294885195496598	497031305927542	6.68449e+07	1.75794e+08	122009024194229
ATP1A4	37802449698701	114730231831544	0.347252349688127	330394400310278	0.000953348725761141	0.000936060393760383	22004558832929
ATP2A1	395180032647839	15588926755788	0.188415826604755	827368222547957	0.0129884	0.147934	0.843887822532013
ATP4A	530300513059165	286078769263434	0.602279151654395	474993644521161	2.03481e+08	6.50709e+08	0.928448540372894
ATP5MF.PTCD1	594203997316543	163337915137851	0.229154116370936	712786301745734	101.939	702.347	0.92693109113931
ATP6V0A4	181624295329441	106410364642569	0.463383549069021	229637769524528	0.0216542951655813	0.0170239753215959	22004558832929
ATP6V0D2	398473351457729	256955866204806	0.332172221118113	773562176090089	1.02899	9.62445	0.843887822532013
ATP6V1B1	265167924650751	198216178124834	0.309607881488779	6402168354749	15318.6	84661.6	0.896246230775245
ATP6V1C1	327144752480471	101772236678236	0.107810648394071	943990581581854	3.73115e-07	5.66689e-06	0.978648097738888
ATP6V1C2	64348332690959	100089467490684	0.128603336100231	778280490427371	0.70934	0.765948	0.740277061123834
ATP6V1FNB	258644398692182	216022300856719	0.211819345698087	101984216854594	2.01521e-10	4.37489e-09	0.896246230775245
ATP8A2	126960458866285	170081209331346	0.273461861662938	621955867253563	49855.5	25197.4	0.926079317758803
ATP8B3	113874140180447	111317525879349	0.180429035452887	616960156107559	68462.3	261995	122009024194229
AURKA	801250302009939	269692917429297	0.158501661698276	17015147635656	6.34132e-51	1.22642e-50	119634206973591
AURKB	360119185372603	358649936533385	0.206372422355271	173787724367536	1.19484e-53	3.57619e-51	0.972157883339661
AVPR2	122731672165862	168427060043493	0.255486027462242	659241766434309	4327.21	24643.1	0.928448540372894
AXDND1	811393835957488	193714306446438	0.293115566364019	660880310279617	38.744	22447.1	0.916910653286286
AXIN2	498998164114818	197956430548358	0.307235141732364	644315716724881	11701.3	6229.91	0.947962011920702
B3GALT1	181766134049664	392314123736109	0.520820097622862	753262259898797	4.97312	39.8006	0.916910653286286
B3GNT3	663209897603475	189501341256837	0.319942332804362	592298429519525	316151	1.17662e+06	114845450627745
B3GNT4	184277644954448	141537714606277	0.213386760969375	663291921032488	3291.12	19052.9	0.926079317758803
B3GNT5	452675914069496	167425254621275	0.240296160168562	696745443222355	322.727	2049.63	0.946412670017622
B3GNTL1	264360128988923	148219961292503	0.140664828187938	105371017902549	5.82669e-12	1.46023e-10	0.896246230775245
B4GALNT1	334414336247981	423117936327828	0.279890626393072	151172599733158	1.24621e-37	1.71541e-35	0.90593063721884
B4GALNT2	166314944765698	716630884882085	0.59499860307031	120442448298891	2.07972e-19	1.11408e-17	0.794886437342711
B4GALNT4	123278305070989	349652910091313	0.440426156557555	793896785840921	0.203871	1.44155	122009024194229
B9D1	452123751424809	108550177733116	0.155415643282468	698450782948702	285.856	1823.92	0.947962011920702
BACE2	167940931309051	134994180646121	0.295293819551775	457152069254372	4.84197e+08	1.57762e+08	0.862329573726731
BAIAP2L2	572958095502889	30240525241769	0.253930110156017	119089954409853	1.0625e-18	4.54858e-17	0.946377764541293
BANF2	103188793729588	497807629866945	0.48561556351119	102510641600447	1.17048e-11	2.51142e-09	0.928448540372894
BARD1	163646830270645	12697888609834	0.145057201489663	875371128040059	0.000206449	0.000295654	0.794886437342711
BARX1	180579089069841	121785028995723	0.420702789342225	289479965621657	0.00379400593963643	0.00761475124628681	0.922866740464942
BATF	221482423214405	105478718941766	0.260702778721099	404593765587009	5.21141e+09	0.000142384233990146	0.900484214151191
BCAM	833199084922487	101900050862296	0.174596594612158	583631376595017	533684	1.99121e+06	111383846496267
BCAN	141368156341354	463646831779845	0.306514808196733	151264088840451	1.08454e-38	1.12697e-35	121585773816799
BCAS1	140348824550897	248042277083294	0.327261365614859	757933270299938	3.47337	30.063	0.864675952044456
BCAS4	193902418297721	171574373554365	0.180520190165697	950444232287146	2.01123e-07	3.53949e-06	0.864675952044456
BCAT1	25705668529068	145117359830564	0.185611004995032	781835968370778	0.535161	4.82125	0.90593063721884
BCL11A	534604071244565	104703310681314	0.287246017868931	364507440200926	0.000267314454842617	0.000661407182236886	0.896246230775245
BCL2L14	665623223034427	111809838195166	0.28364542088451	394188765136775	8.08428e+09	0.000257420396405057	0.745029512844227
BCL2L15	172598569776899	112460207054564	0.252982413432213	44453764800808	8.77381e+08	2.59028e+08	0.926079317758803
BCL9	879253429166454	134464830575086	0.129561150214959	103784838550747	3.1067e-11	5.5394e-10	118485111424296
BDKRB1	292006766121623	248709481336213	0.273907322662839	908005959527988	1.08515e-05	0.000157106	0.896246230775245
BDKRB2	274968279253281	13993339916539	0.242277124603081	577575779779628	766075	3.41665e+06	0.90593063721884
BECN2	120789957391172	238877987576514	0.522035504432254	457589542374725	4.74187e+08	7.6984e+08	181201088751161
BEGAIN	512830328088335	151578877402875	0.329214287377587	460426182017502	4.13931e+08	1.56125e+09	0.745029512844227
BEND3	165263999221225	116110693508947	0.146241864791522	793963436355729	0.202778	1.93195	0.896246230775245
BEND6	932183965409011	126044148627078	0.326933628917908	385534363792006	0.000115567177962801	0.000296009186388583	0.916910653286286
BEST3	316488470342827	133619503936194	0.546743945799976	244391373626802	0.0145289000129344	0.0144393006363855	176514789994648
BEST4	185962734347331	231792930958378	0.250053297121575	926974103627522	1.86598e-06	2.78926e-05	0.92693109113931
BEX2	329044357143966	259437198687617	0.351957805617675	737125855846024	16.9025	121.063	0.972157883339661
BFSP1	534476404976494	146713509763518	0.157800533031061	929740267319882	1.43918e-06	2.19538e-05	0.916910653286286
BFSP2	111119950260218	303281657983866	0.363548324078604	834226533026991	0.00728807	0.078601	0.916910653286286
BGLAP	301826136874235	182062860939577	0.186695724688901	975184949965814	1.81138e-08	4.04738e-07	0.740277061123834
BICD1	154086506191633	122705308515799	0.165797241954525	740092579763511	13.5238	118.638	0.794886437342711
BICDL1	548829561820293	228497995002731	0.203560155643229	11225084510311	3.07093e-16	9.86006e-14	0.946377764541293
BIK	742810929102045	186788305454637	0.274763725289406	679814285011222	1059.76	6724.23	0.896246230775245
BIRC5	10410669666017	410436868031307	0.208516537225683	196836602742486	2.97705e-73	3.36915e-69	121207511092582
BIRC7	165782928618138	139176486398064	0.37072068322959	375421422904185	0.000173886100462197	0.000430506638877532	0.922866740464942
BLACAT1	285692519656398	203184149700405	0.532690313382019	381430156689731	0.000136568619442536	0.00014630720765077	229346620018431
BLM	144294850468945	247016902938047	0.189064714677363	13065203803871	5.20451e-25	4.04302e-23	0.794886437342711
BLVRA	913363935304111	127356818290782	0.160151739436771	795225944711409	0.18314	1.41919	111379738450843
BMP4	517994599878309	170944214674944	0.250643815170458	682020478178119	9.09108	5524.84	0.945542994669583
BMP7	285660071985925	407579171065677	0.546512130931712	745782477638368	8.79625	83.7892	0.745029512844227
BMP8A	93459395409293	103952328081145	0.223784264240186	464520275516664	3.39743e+06	1.06649e+09	0.916910653286286
BMP8B	142979454110892	147746089497821	0.272666243366608	541856915156057	6.00779e+06	1.81679e+07	121585773816799
BNIP5	817654762361353	284020764685541	0.489142701703307	580650112322061	637918	2.83426e+06	0.916910653286286
BNIPL	310991775232347	148080237482725	0.169274987906754	874791009078645	0.00021734	0.00293352	0.843887822532013
BOLA2B	236912863588526	173870671289793	0.198349556094301	876587146013726	0.000185337	0.00285508	0.740277061123834
BOLL	0.778110170187246	110535414816817	0.518512291643195	213178002910064	0.0330249341539449	0.0251126538355065	22004558832929
BOP1	373154057576172	168812108341555	0.164655912520834	102524170409122	1.15421e-10	2.36173e-09	0.978648097738888
BORA	718542369681972	104091761545542	0.135887086667122	766016581108493	1.85693	15.588	0.916910653286286
BPIFA1	333708721132838	372491748111368	0.900151195986879	41381020185502	3.50191e+09	3.73891e+09	250720538287654
BPIFA2	97229153095406	520981915497648	0.626534660765019	831529280218134	0.0091526	0.097172	0.922866740464942
BPIFB1	185126682806545	192653470799337	0.508644881739046	378758300173313	0.000152119875181484	0.000378160977634241	0.92693109113931
BPIFB2	364005889004306	384634794923019	0.478676691421901	803537756936666	0.0932912	0.910552	0.900484214151191
BPIFB4	104099002142143	441873817483094	0.506393250338569	87259025902826	2.64066e-05	0.00323338	0.92693109113931
BPIFB6	253536926326264	338036068894526	0.879844296331523	38419987525515	0.000122036456686737	0.000121190351154202	250720538287654
BRCA2	138626191916952	131956472278961	0.148038719388965	891364589099504	4.93814e-05	0.000670533	0.896246230775245
BRDT	77379175108591	418155709693133	0.725409911599718	576440579328439	819460	3.56622e+06	0.926079317758803
BRICD5	923529056393148	14056849379125	0.156592411098823	897671175792414	2.7898e-05	0.000403911	0.864675952044456
BRINP3	130185103933609	545748081428273	0.6642110261902	821648632601885	0.0209552	0.215778	0.916910653286286
BRIP1	215787673095196	138383711881821	0.16281491976618	849944907263755	0.00190493	0.0221511	0.900484214151191
BRME1	111004875999703	135820818088623	0.167914983001443	808866580342364	0.0603218	0.0452403	121585773816799
BRS3	0.763201234145184	135090802001546	0.504072200323684	267998913478663	0.00736245498995495	0.00629895052890799	22004558832929
BRSK1	111224412743416	180129314538774	0.16806345727995	107179346095877	8.38549e-13	2.28306e-12	0.896246230775245
BRSK2	467144643878929	347683287539186	0.356758048781402	974563261366593	1.92576e-08	4.26815e-07	0.745029512844227
BSG	201783677174371	103056415712803	0.119792237487314	860292936123814	0.000777068	0.00764101	111281493908931
BSN	190467932287517	128390869825746	0.208590596027173	615516098381635	75001.3	381272	0.896246230775245
BSND	571221602300635	385384931339189	0.533539405288526	722317653615071	50.787	361.486	0.928448540372894
BSPRY	158865936240791	123460396841322	0.278729617465955	442939641519802	9.44972e+07	2.86434e+09	0.896246230775245
BTN1A1	141225354206266	10361322650409	0.436674709276988	23727782787248	0.0176548583512515	0.0135736245587222	229346620018431
BTNL3	240254067292089	24620612650572	0.612901892542524	40170560656025	5.89297e+09	0.000191138993344169	0.745029512844227
BTNL8	235770470736729	363219832803506	0.406709451613032	893069564434652	4.23338e-05	5.75781e-05	0.900484214151191
BUB1	333431415161794	350805341032454	0.188324276403858	186277280726229	1.91482e-63	9.49673e-62	0.900484214151191
BUB1B	259639282324073	35197156987681	0.203432817467238	173016121124849	4.57408e-53	1.3426e-50	0.896246230775245
C10orf95	684460378121569	122949130277976	0.192745410412675	637883568873248	17843.9	95655.9	0.916910653286286
C11orf16	236084165042018	126081725140194	0.264274275106204	47708663694007	1.83435e+08	3.14169e+07	181201088751161
C11orf53	725969499831403	191971204282685	0.719131870943927	266948541761478	0.00759675717691985	0.0144393006363855	0.922866740464942
C11orf80	23530884860797	127574386466378	0.147495941082481	864934896039189	0.000517941	0.00637449	0.896246230775245
C11orf91	322707144827504	108765841682369	0.299442821964235	363227413397006	0.000280934442340449	0.000288209139897553	229346620018431
C12orf56	244661805821487	447451863076421	0.506597667054258	883248961011297	0.000102371	0.00134655	0.896246230775245
C12orf75	55465070726721	217932663320752	0.260119434087127	837817689730002	0.00537538	0.0568615	0.945542994669583
C13orf42	116621804158882	128588457636087	0.56092458236887	229243755181915	0.0218804072078139	0.0171955419812414	22004558832929
C15orf48	304770786251389	230881974446556	0.305210503178894	756467985347242	3.88821	32.1275	0.900484214151191
C16orf74	398753007933317	115850371149697	0.234512582849767	49400492605513	7.81028e+07	2.72827e+08	0.896246230775245
C17orf50	0.698686892298737	125633722815009	0.481213421343257	26107693019932	0.00903388126948595	0.00731777775041806	229346620018431
C17orf78	152920180677046	108539140897603	0.371324086097241	292302990733488	0.00346643219166392	0.00276361610419001	250720538287654
C17orf99	272992225442781	259944745677194	0.44608796199235	58272082599183	563623	1.32271e+06	181201088751161
C18orf54	626252859140213	142223606116059	0.169012840502753	841495863231421	0.000393034	0.0471238	0.843887822532013
C19orf33	538451736014734	151138273210644	0.324097064861565	46633644545717	3.11081e+08	1.20064e+09	0.740277061123834
C19orf67	456372854108667	264559186193857	0.35826382879801	738447939557461	15.3051	115.305	0.92693109113931
C19orf81	14719074906733	487066299009423	0.561697364726928	867132960907184	0.000427103	0.000516422	0.922866740464942
C1orf100	346256043239545	183344772388951	0.335889233423328	545848911322138	4.80203e+06	1.02863e+07	176514789994648
C1orf105	249369587939901	114164893076883	0.218125084852491	523391856347415	1.65954e+07	6.17257e+07	0.916910653286286
C1orf116	230969550185898	112825484657193	0.341139240462552	330731476403045	0.00094194985460935	0.00213787053566374	0.896246230775245
C1orf158	275396025522444	303937426261806	0.633629711776263	479676726979507	1.61247e+08	2.78281e+08	181201088751161
C1orf194	167099141642325	20651400978223	0.389643908216689	530007028025658	1.15758e+07	1.70346e+07	250720538287654
C1orf198	233503441352028	115582085446558	0.123794487749483	933661001776231	9.94678e-07	1.62878e-05	0.862329573726731
C1orf35	857286242034366	131283141318566	0.102582524032236	127978076730995	1.68645e-23	7.84678e-22	119634206973591
C1orf87	114051898343568	136233328033392	0.686567839697705	198426608641289	0.0472261847222107	0.0335945520799343	229346620018431
C1QL1	362665709940085	395397164835361	0.34855840003605	113437852823076	7.96242e-17	2.79751e-14	0.900484214151191
C1QL4	18425602585792	423879430224666	0.442649887853819	957595250458186	1.00923e-07	1.69438e-07	0.928448540372894
C1QTNF12	386170401404342	143785133422115	0.230141856242849	624767418536812	4166.1	232254	0.843887822532013
C1QTNF3	750019728598044	343639108031005	0.321522315985464	106878773555034	1.15995e-12	2.42639e-11	116063127897958
C1QTNF3.AMACR	187428784271919	110700355691434	0.298200546213789	371227877000832	0.000205401574124063	0.000268022761106618	181201088751161
C1QTNF6	833666944417702	120816882250193	0.145978321060816	82763578435636	0.0127	0.111266	111379738450843
C1QTNF9B	500808301274696	185022414046678	0.442680539460379	417959222404982	2.92032e+09	8.04205e+09	0.928448540372894
C20orf144	5410722497825	239627882644447	0.280694784521157	853695529303235	0.00137805	0.0158343	0.922866740464942
C20orf203	137172107484132	107771022243175	0.387928028850489	277811898672346	0.00546745928944835	0.0042296875139878	250720538287654
C20orf204	264889203577349	511402743301582	0.33625117683048	152089502889503	3.08449e-38	4.14497e-36	0.972157883339661
C20orf96	222534283684521	10273307393329	0.103918120950642	988596339055103	4.78952e-09	9.23829e-08	0.90593063721884
C21orf58	16970738571699	228168076723957	0.154679845713415	147509894176322	3.03187e-35	3.60913e-33	0.896246230775245
C22orf23	18628476778141	112669358235469	0.162672408233235	692615050451128	43.2446	2797.18	0.916910653286286
C2CD4D	128589049522632	137055512370219	0.213019868145103	643393095506289	12434.5	67258.2	0.928448540372894
C2CD6	869922075074363	141642590770146	0.281097687035225	503890986311802	4.68191e+07	1.62675e+08	0.928448540372894
C2orf66	184196235875718	158396108974145	0.391872181911638	404203503809468	5.29893e+09	5.53186e+08	250720538287654
C2orf92	629772957853035	101062989636189	0.145443823129757	694859275983319	368.948	2927.97	0.745029512844227
C3orf22	207982187340342	172540191254621	0.358168184023043	481729530849453	1.45517e+08	2.5245e+08	181201088751161
C4orf46	157710583899478	116556906289183	0.112302809292696	103788059286566	3.09623e-11	8.06939e-10	0.794886437342711
C4orf48	823922153711543	195415889261785	0.258755398480427	755214733332672	4.2814	41.9931	0.745029512844227
C4orf54	801283060647523	213448133317807	0.443114754504392	481699449517407	1.45737e+08	4.80911e+07	0.916910653286286
C5orf34	677011211918978	240824235983997	0.151052300537758	159431028277387	3.18156e-43	5.63403e-41	0.896246230775245
C5orf46	276981386657409	385495892526601	0.344840762930885	111789537075077	5.16959e-15	1.68913e-13	0.916910653286286
C5orf58	435959480461409	317119467602195	0.38494323955401	823808382684172	0.0174991	0.181618	0.916910653286286
C6orf132	166532247816892	110271912849797	0.352831230917328	312534444763012	0.00177596969916191	0.00386530871879824	0.896246230775245
C8orf33	238957266901381	128922023988424	0.111756823826227	115359420189757	8.69303e-17	3.07339e-15	0.998495350515408
C8orf34	157161740004801	110969526760572	0.453781927136003	244543733728985	0.014467658713217	0.0104247770718771	250720538287654
C8orf76	455158637793992	103843190138849	0.123309535274019	842134307846418	0.00372193	0.040088	0.946377764541293
C9orf152	127790117542312	180667359034439	0.31668494907653	570495565265337	1.16373e+06	3.8296e+06	122009024194229
C9orf50	311549665024765	157747561698753	0.332355397609717	474635173170845	2.07118e+07	3.52057e+07	181201088751161
CA10	186659203999741	226495360143391	0.486269462421932	465781583353598	3.19582e+08	4.24152e+08	229346620018431
CA12	108151347805818	28781416478527	0.35869035569449	802402853090404	0.102333	0.812717	111379738450843
CA4	625831224371476	32513875644963	0.362924052129519	895886493446282	3.28038e-06	0.000453771	0.896246230775245
CA5B	175862963013339	112589974659309	0.183789433209128	612603089815272	900.983	452119	0.896246230775245
CA7	0.927600672669165	129998226487359	0.502106450223313	258905708997647	0.00962391376204811	0.00965047565097161	181201088751161
CA8	202781978209755	203903211883565	0.294647090627942	692025200211595	450.841	2883.72	0.926079317758803
CA9	382431717243222	226791359706941	0.438284822984025	517452003386408	2.28498e+07	7.90082e+07	0.972157883339661
CABP1	13592906183085	175354210676716	0.243684514082391	719595216532423	62.0264	43.727	0.928448540372894
CABP7	146848383155808	122546064675477	0.191323556284615	640517388737937	15019.8	80595.1	0.92693109113931
CABYR	294856092057284	42767236186347	0.334845324761216	1277223632041	2.34324e-23	1.40714e-21	0.90593063721884
CACNA1B	281145960413175	225378178395703	0.522347415613492	43147179761768	1.59807e+09	1.93594e+09	229346620018431
CACNA1C	137147429511202	121248295995354	0.192394376740645	630207067635877	29369.5	117676	121585773816799
CACNA1E	232844093653621	392418072366223	0.42624292205777	920644196205648	3.37114e-06	4.93606e-05	0.922866740464942
CACNA1G	544214088162127	217801801808283	0.408170729483793	533604656276391	9.4995e+06	3.61782e+07	0.926079317758803
CACNA1I	409119967540126	270537035016122	0.40327716268054	67084640552887	1966.84	11837.3	0.916910653286286
CACNA1S	476177741707199	24756297697539	0.371670429149301	666081984359168	2723.04	15941.1	0.92693109113931
CACNA2D3	303995841469512	153610395936779	0.278634046909925	551298011281575	3.52808e+06	1.46392e+07	0.896246230775245
CACNB1	569138107216355	107375532284293	0.163906136855432	655103795039723	5713.85	32502	0.916910653286286
CACNB3	131948733129641	1115876328458	0.1663418289314	670833268833534	1968.61	9044.23	122009024194229
CACNB4	44735668159511	303415816862185	0.307134275636369	987893051771969	5.13783e-09	9.98088e-08	0.896246230775245
CACNG1	110260753448573	494413702252154	0.631111735113116	783401218428521	0.472543	4.18379	0.92693109113931
CACNG4	241004491807675	395085351524229	0.444481057011105	888868817449645	6.18346e-05	0.000830162	0.896246230775245
CACNG8	893881877954493	124539573932539	0.231894433960362	537052881371987	7.85061e+06	3.05226e+07	0.916910653286286
CACYBP	241472470176267	105631090543216	0.0980974362618187	107679766738542	4.87599e-13	1.21634e-11	0.998495350515408
CAD	14336237513424	127526553242391	0.100756958251078	12656848266956	1.02534e-22	4.5001e-21	121207511092582
CADPS	300364517397163	147194100900734	0.43094691635002	341559703332884	0.000636423502804508	0.00145232172790173	0.916910653286286
CAGE1	418285558941651	208543784724215	0.407397990188845	511892031248232	3.0729e+07	4.65963e+07	229346620018431
CALB1	907694863131128	100045753614765	0.303119029710195	330054347661434	0.000964977610992486	0.00212156800469953	0.926079317758803
CALB2	665678179898107	10581416819554	0.377887833809959	280014752337208	0.00510792571492219	0.00999457127865144	0.926079317758803
CALCA	100519051997211	251899948212968	0.417839814803403	602862482914629	165361	600680	122009024194229
CALCB	908948115507559	129195191894891	0.262699539616828	491798318654588	8.74404e+07	2.94214e+08	0.926079317758803
CALCR	578313438928955	106066207635395	0.367804719541205	288376418246348	0.00392952891380273	0.0079143196896907	0.916910653286286
CALML6	232060143636922	180802605238893	0.236402984723972	764806778772278	2.04022	16.8965	0.926079317758803
CALY	16023313864003	363158266627041	0.40399075138091	898927179361664	2.48874e-05	3.3864e-06	0.926079317758803
CAMK2A	280947684597574	150008461713329	0.357081669458291	420095665904382	2.65789e+09	7.45116e+09	0.916910653286286
CAMK2N2	104900950731244	237619644895005	0.264516389607338	898317284791843	2.63069e-05	0.000368179	0.896246230775245
CAMKV	277253431565775	310666500930389	0.570354464033677	544690224274365	5.12546e+06	1.06762e+07	181201088751161
CAP2	130870698354704	22658394424369	0.161792647079641	1400458848616	1.46124e-30	1.77392e-28	0.709370283899155
CAPG	138054544999028	135098159263056	0.208698401836169	647336817505244	9584.2	41564.7	118876714947973
CAPN11	268845714786383	21130406807862	0.169521141624402	12464761979175	1.16218e-21	6.372e-20	0.916910653286286
CAPN12	6447849139393	154247272446185	0.2170207572435	710748936670224	118.173	790.024	0.945542994669583
CAPN13	494387249206308	234296496685345	0.478926826683129	489211469543263	9.97583e+07	4.08416e+08	0.745029512844227
CAPN14	494209494150904	204215680144283	0.365777051891359	558306430346916	2.36317e+06	9.72423e+06	0.922866740464942
CAPN9	195849437867894	24055903431862	0.300103683830637	801586409230415	0.109365	1.03586	0.922866740464942
CARD18	584559915520075	458555749130007	0.628672177834915	72940359904144	30.0805	220.057	0.92693109113931
CASKIN1	125132780526459	360046017595541	0.398193917152965	904197683806481	1.53864e-05	0.000212994	0.926079317758803
CASP14	244597432834626	285433839717434	0.768439317969774	371446167631757	0.000203636726390522	0.000265916302223555	181201088751161
CASQ1	748661405343772	131144965853349	0.264988366046451	494908390922943	7.45636e+07	2.52831e+08	0.92693109113931
CASQ2	481385158844379	120607091135413	0.214970885459496	561039188528333	2.01869e+06	8.61649e+06	0.896246230775245
CASTOR2	418176755740958	157398049644307	0.162737483673037	967189894373337	3.96943e-08	8.61252e-07	0.745029512844227
CATSPER2	65785807617509	124467918539676	0.147768841213863	842315047727391	0.000366493	0.00498555	0.740277061123834
CATSPERB	263191568422221	152334433396663	0.316679069262046	481037265114004	1.50649e+08	6.07128e+08	0.740277061123834
CAVIN3	388039556162378	12461963555847	0.188236734332476	662036748567674	3583.07	21320.5	0.896246230775245
CAVIN4	169137394577374	173074845591056	0.223247609050327	775259570874234	0.900329	7.75978	0.926079317758803
CBFA2T2	796129162904344	119420577301738	0.0924599678459682	129159224347432	3.66031e-24	1.79135e-22	119634206973591
CBLN1	109038826033934	153022129346417	0.260482081436579	5874574116672	423932	2.03442e+06	0.864675952044456
CBLN4	111721911210149	158269352954332	0.443554828473712	356820268418546	0.00035943841591375	0.000656170822483574	121585773816799
CBR3	697280463522961	194742703326261	0.227262128477897	856907856274003	0.00104316	0.0149216	0.745029512844227
CBX2	225413663830252	271388834620311	0.203509764417472	133354208038684	1.4404e-26	1.07136e-24	0.90593063721884
CBX8	500501165557873	119804585379434	0.110382096910092	108536247030184	1.9167e-13	5.27018e-12	0.946377764541293
CBY2	586261657237438	453657694565598	0.646037326006638	702215918962145	218.465	1453.03	0.916910653286286
CCDC102B	143966951549723	129916486747144	0.163584475655224	794185916645049	0.199173	1.41451	121585773816799
CCDC112	108580720387287	104763236992002	0.158185722709183	662279978229162	3524.58	21708	0.864675952044456
CCDC13	41448961638776	104710400585799	0.25868980988827	404772034240641	5.17189e+09	0.000170068789647215	0.740277061123834
CCDC137	993318596127171	101310462235628	0.100524572803956	100781788382433	6.8993e-10	1.11809e-08	116063127897958
CCDC154	4048623323925	191862228170893	0.217369247553448	88265580495105	0.000107946	0.0016894	0.745029512844227
CCDC163	980081535949668	143745663554593	0.140212838412387	102519616022475	1.15966e-10	2.57494e-09	0.896246230775245
CCDC169	303190620779822	17055990217633	0.579878309958523	294130508500187	0.00326832460213641	0.00354355609011598	181201088751161
CCDC170	37751127634414	249584167237338	0.26782505440619	931892528840162	1.17525e-06	1.90662e-05	0.864675952044456
CCDC180	248049668936957	177296071826986	0.205838687562799	861335028542169	0.000709559	0.00913299	0.843887822532013
CCDC183	705610632080718	154210779501774	0.210827069217383	731456259740385	25.8221	234.282	0.745029512844227
CCDC185	480157008744207	378375061780582	0.597903583374599	632836250361661	24777.7	129619	0.926079317758803
CCDC187	120233336712225	375717519701884	0.426376225120527	881187781039332	0.000123067	0.00120135	121585773816799
CCDC188	906592786520297	138163798999786	0.179998583494811	767582701581476	1.64355	13.7705	0.926079317758803
CCDC192	724051956296834	154960838177966	0.270764385871458	572308790460839	1.04605e+06	4.49345e+06	0.92693109113931
CCDC197	154840499230908	242873307428159	0.635883690244383	38194611869164	0.000133743501279289	0.000143427436721632	229346620018431
CCDC28B	252400635191558	238923514631602	0.205954146567277	116008110841097	4.08191e-17	1.63325e-15	0.900484214151191
CCDC34	499389851559473	166932842893684	0.141835177405733	117694951243412	5.6059e-18	1.89009e-16	115299650756476
CCDC60	217259009717312	180897502440311	0.552151331650626	327623048376117	0.00105202668607923	0.00122974556304292	181201088751161
CCDC74B	856378391556676	146384980463227	0.318435860452527	459700048402843	4.28617e+07	1.31862e+09	0.922866740464942
CCDC78	372469448474357	234019231293683	0.246811099673376	948171421801444	2.5014e-08	4.47862e-06	0.843887822532013
CCDC80	132008225753882	180662570459642	0.284010543659717	636112195454618	20028.5	82082.3	121207511092582
CCER2	223178541857483	179519649871322	0.219348043827317	818423755867408	0.0274033	0.276525	0.926079317758803
CCHCR1	137796375019038	141385199082612	0.114842360308945	123112411397904	7.88019e-21	3.08983e-19	118876714947973
CCIN	216535709740139	138876005598808	0.36506379650174	380415716183309	0.000142287825580196	0.000139868714850526	250720538287654
CCKBR	161816322562254	256687389909478	0.714546634272298	359231123061536	0.000327758067294687	0.000332527356191153	229346620018431
CCL13	1986632039665	191413474657123	0.30724698337027	62299545648084	46657	236732	0.926079317758803
CCL20	172700672217953	135211041519474	0.317156869648531	426322285464962	2.01499e+09	4.77099e+09	111379738450843
CCL25	240311464717751	468874972311532	0.411210648273474	114023061970834	4.07187e-16	1.49594e-14	0.90593063721884
CCL26	168108378550437	317756103932676	0.385517325787732	824233005049517	0.00168889	0.173623	0.928448540372894
CCN3	119499560292691	113558380326723	0.2052599076485	553241895252078	3.15844e+06	9.86287e+06	121585773816799
CCNA2	561218689555431	350419515153671	0.214226224921853	163574518143845	3.849e-46	7.49996e-44	0.946377764541293
CCNB1	91457524124046	328471830560469	0.174492928691335	18824363429736	4.76905e-65	2.34548e-62	114845450627745
CCNB2	425255023228621	373463731867139	0.192420365371408	194087424762074	6.51009e-70	6.611e-67	0.945542994669583
CCNE1	249352100820531	360563929538462	0.252291640199841	142915527939356	2.47039e-32	2.57968e-30	0.90593063721884
CCNE2	947914247709714	210580945167508	0.187889413677752	112077067592895	3.73751e-15	1.30107e-13	0.864675952044456
CCNF	364019726722189	219296966287998	0.146438610181398	149753515153105	1.06404e-36	1.3902e-34	0.896246230775245
CCNI2	119477714218896	161762083831718	0.283606657306556	570374776699499	1.17201e+06	5.05082e+06	0.916910653286286
CCNJL	605394848861508	104468291554813	0.268595024211201	388943510259028	0.000100477832898895	0.000315345514062226	0.745029512844227
CCNO	744996853319038	324205198986997	0.33801307077183	959149888040413	8.68145e-09	1.82062e-06	0.740277061123834
CCNP	172763067335259	147532496620457	0.285122663883617	517435178989058	2.28704e+07	6.40135e+07	121585773816799
CCR10	224846630669615	119694401122863	0.225474180384617	530856353125163	1.10493e+07	4.16289e+07	0.928448540372894
CCR3	155147481128867	329618926372368	0.468440671791758	703651382600054	197.109	1301.31	0.928448540372894
CCR8	470265673400721	138224559841177	0.360504184830889	38342012563881	0.000125972970714198	0.000320662199125763	0.916910653286286
CCSAP	364098467090485	102612147501408	0.128174405178221	800566597978201	0.118822	1.14231	0.90593063721884
CCT3	155086718831116	118017102715594	0.0953584761072396	123761523393969	3.51808e-21	1.53178e-19	111379738450868
CD109	568517224295602	246779103464773	0.230351404261221	107131581965492	8.82972e-13	2.28158e-11	0.945542994669583
CD177	131518101440132	100517190188584	0.336540304563137	298678015160964	0.00281932388768451	0.00579317788083951	0.922866740464942
CD200	139913012581624	187759407453893	0.167023900143999	11241469471855	2.551e-15	9.00738e-14	0.864675952044456
CD24	559483808712367	206202774823323	0.283989483398603	726092995964573	38.4438	379.481	0.6669467798541
CD248	587863803201562	113992119871463	0.171344631237896	665279787571493	2875.73	16419.7	0.947962011920702
CD34	186960826372852	209127197411164	0.122810613382069	170284303328541	5.05418e-51	1.9697e-48	0.572985601436948
CD70	12281869283249	10848021254316	0.268997787305901	403275482782307	5.51268e+09	0.000146277386931162	0.926079317758803
CD8B2	140417494462586	11475689583254	0.567116039768848	20235170191856	0.0430198707071565	0.0308090335968231	229346620018431
CDC20	801096467954641	42897542699957	0.221593657380347	19358650968212	1.7234e-69	1.25295e-66	114845450627745
CDC20B	158987452229417	382556647163136	0.465643268377398	821565935004731	0.0211002	0.217163	0.916910653286286
CDC25A	18108122662256	215454936628738	0.192818822409127	111739577047919	5.46886e-15	1.88897e-13	0.864675952044456
CDC25B	234466002416134	103019893132403	0.137069747100365	751587387528849	5.6532	70.6981	0.572985601436948
CDC25C	196654876639131	436287655397101	0.212656033973429	205161192581826	1.5457e-79	6.10342e-76	121585773816799
CDC45	258165119427787	308625652350294	0.187881945311148	164265731781297	1.2344e-46	2.6617e-44	0.864675952044456
CDC6	557310580915278	321981507768954	0.187912194875844	171346786716898	8.18036e-52	1.76948e-49	115299650756476
CDC7	183453137591128	206757879159496	0.160869259025924	128525412755322	8.32304e-24	3.88932e-22	121585773816799
CDCA2	102179852869244	319976789781107	0.215016153442457	14881523302236	4.34493e-36	5.44441e-34	0.896246230775245
CDCA3	321741446765161	331163147616913	0.183815380827886	1801607385222	1.45726e-58	6.47298e-56	0.864675952044456
CDCA4	28301310081644	141194420288735	0.124196766634424	113686067773684	5.99366e-16	2.2186e-14	0.864675952044456
CDCA5	534711288153088	344653454646696	0.176674402479645	19507831910534	9.41931e-71	1.12533e-67	0.945542994669583
CDCA7	182662369223032	372982992101191	0.315813675496165	118102229586863	3.45643e-18	1.51146e-16	0.896246230775245
CDCA8	355266553042832	317397536863319	0.177636378460436	178678229996685	2.10032e-57	8.03642e-55	0.896246230775245
CDH10	738547462790718	406266620376941	0.822390556718742	494006913209102	7.80949e+07	2.64156e+08	0.92693109113931
CDH11	346605440510751	157638720785048	0.254642225433391	619059625781832	59937.1	307786	0.900484214151191
CDH13	398643756322076	232799696467748	0.137516276329305	169288830880115	2.75559e-50	6.80003e-48	0.864675952044456
CDH16	129242003008515	249869168562634	0.407248137410657	613555092360492	84864.6	321825	121585773816799
CDH17	342755848691448	313069525716278	0.456224168067551	686218634673301	678.145	528.93	0.740277061123834
CDH24	14483581508796	219800613629691	0.163110102625484	134755977766977	2.17715e-27	1.29803e-25	122009024194229
CDH7	737887158839516	37003974134818	0.686872222877035	538731555919136	715178	2.77259e+07	0.926079317758803
CDH8	100436047737383	381470824911878	0.396572878870869	961918591099849	6.63542e-08	1.14284e-06	0.926079317758803
CDH9	205364258481351	820370245491882	0.872474350182923	940280072783667	5.31296e-08	8.33887e-06	0.92693109113931
CDHR4	366500966741971	187051870722428	0.388618126370354	481325645999762	1.48491e+08	1.89372e+08	250720538287654
CDK1	629262010664711	34911243798476	0.187082835916335	186608480823375	1.03082e-64	4.18758e-62	115299650756476
CDK3	249426600739648	102184936007408	0.168754664738816	605523623098426	140212	730314	0.843887822532013
CDK5R1	902351269731235	127423224046238	0.1514753187389	841214430886123	0.00402582	0.0339308	121585773816799
CDK5R2	128281630050914	22925211024391	0.644625732569729	355635989475663	0.00037602886943683	0.000483515154971704	176514789994648
CDKL4	222548014021348	189268481641242	0.392717151207664	481946054709385	1.43947e+08	1.83914e+08	250720538287654
CDKN2A	690333404561085	407268237476764	0.228822505246999	177984345131238	7.26721e-57	2.07318e-54	116063127897958
CDKN2AIPNL	102237955797394	101475540551131	0.118676565352442	855059634138987	0.00122454	0.0108586	121940613765583
CDKN2B	351083925869391	133592748624147	0.158870086852434	840893029461448	0.00413767	0.0465162	0.900484214151191
CDKN2C	77540011924791	229599994516513	0.160806213190089	142780549309437	2.99854e-32	2.45616e-30	116063127897958
CDKN3	369118361106878	392102801269773	0.189011025835073	207449697464694	1.3611e-81	9.61758e-78	0.90593063721884
CDRT1	188277580980568	320712084018138	0.377666253703388	849194443171031	0.00203208	0.00230189	0.922866740464942
CDS1	240740170924238	121306701615894	0.302082016746683	401568762425266	5.92727e+09	0.000160659389456164	0.900484214151191
CDT1	545021524949224	343637083512421	0.198598368125783	17303117178424	4.45612e-53	1.03083e-50	115299650756476
CDX1	519691640480421	186512720478962	0.302374618905034	616826640921008	69042.7	34276.6	0.926079317758803
CDX2	785411494931952	399885870247899	0.528224070862817	757038333362418	3.72124	30.1658	0.922866740464942
CEACAM16	36352007159641	121640850291307	0.349435287102791	348106945065122	0.000499415978564809	0.000493193280782147	229346620018431
CEACAM20	818881059064872	459523871464505	0.473391500822127	970705791435759	2.81341e-08	6.20615e-07	0.740277061123834
CEACAM5	111296236499993	22232825205255	0.655796040647692	339020424449299	0.000698405686899107	0.00156560105722609	0.928448540372894
CEACAM7	298565885496931	253301727494925	0.847230707870515	29897609369187	0.00279195865762866	0.00623324125242429	0.843887822532013
CEL	435622063828615	291107599638032	0.289910575748181	100412894178407	1.00354e-09	2.46826e-08	0.745029512844227
CELA3A	374449672662367	371224965416146	0.62526388369071	593709272355437	290121	70521.7	181201088751161
CELA3B	135423304258663	210267392854917	0.563385459688537	373221192061225	0.000189805710376084	0.000183447496387498	250720538287654
CELF3	219054474461056	283916246268304	0.40205628669434	706160444853705	164.591	486.267	22004558832929
CELF4	142259271618283	138898093606201	0.303316077531118	457931853585808	4.66493e+08	1.42406e+09	0.926079317758803
CELF5	737331023159997	179870147471412	0.35514873852419	506464272459074	4.09167e+07	1.47871e+08	0.896246230775245
CELF6	16576136217151	160526075042282	0.425487946433969	37727525864753	0.000161456376515527	0.000178138482971541	22004558832929
CELSR3	294300009560511	349024658943499	0.205101651074609	170171550114209	6.12765e-51	1.55572e-48	0.900484214151191
CEMIP	256928560667176	262455890926597	0.284815170732493	921495474597114	3.1141e-06	4.70566e-05	0.896246230775245
CEND1	108565576723084	234925446242313	0.279599895058104	840220080173824	0.00438188	0.0482709	0.916910653286286
CENPA	133222312937389	411548879137259	0.221795245033213	185553517648961	7.38226e-63	2.59111e-61	121585773816799
CENPE	222233006355219	314920601752164	0.185867871219642	16943251121654	2.15858e-50	5.25594e-48	0.896246230775245
CENPF	990908892253703	389403726238335	0.19178590994508	203040841920997	1.18329e-78	3.40037e-75	111379738450843
CENPH	188620846868654	186517040887902	0.135780043376765	137367050598408	6.11982e-29	6.03475e-27	0.794886437342711
CENPI	884393463869258	310457417229763	0.192567976133544	161219650049426	1.78831e-45	3.6927e-42	0.794886437342711
CENPJ	226812950885024	126077897686478	0.118610443632026	106295781236279	2.17092e-12	5.65896e-11	0.896246230775245
CENPK	113145155477072	263858949635637	0.184844438945664	14274649058455	3.14869e-32	3.29275e-30	0.896246230775245
CENPL	185906835775821	237370753817066	0.140788976566849	16860038307357	8.85317e-50	1.53662e-47	121585773816799
CENPM	296896141123776	355981638730598	0.208779587293248	170505959584349	3.45988e-51	8.99834e-49	0.900484214151191
CENPO	28106277605687	156785622197894	0.140649002854763	111472971024042	7.38146e-15	2.41811e-13	0.900484214151191
CENPP	124562911776409	110242168939032	0.106697481998178	103322184248841	5.03817e-11	8.49945e-10	122009024194229
CENPU	418336633582028	21861576968559	0.163547098689802	133671444762365	9.40839e-27	5.61662e-25	115299650756476
CENPW	262414385699075	259965395054265	0.173693724882092	149668846834125	1.20851e-36	1.55261e-35	0.90593063721884
CENPX	270402151366346	105971938751064	0.148784871619681	712249421580617	105.991	680.965	0.995031561367341
CEP131	63211538287148	180533844463973	0.114774218054773	157294771877965	9.49922e-42	1.46898e-39	0.947962011920702
CEP152	114076279483995	138340640948598	0.13455595666704	102812721469421	8.55903e-11	2.16298e-09	0.794886437342711
CEP250	10768535979471	108704530245617	0.0813927761601621	133555501328166	1.09943e-26	6.29815e-25	118876714947973
CEP55	169508901254356	306551138558451	0.20918004880487	146548937295838	1.25353e-34	1.08408e-32	122009024194229
CEP72	24508850878702	137012271084144	0.133928226123979	102302759507402	1.45105e-10	3.17109e-09	0.90593063721884
CERS1	373732003900996	449005310998296	0.428584253556898	104764770817388	1.10794e-11	3.2367e-10	0.740277061123834
CERS3	218646499524995	112510865663679	0.394653999510537	285087357034817	0.00435993015619827	0.00463602712556893	181201088751161
CFAP43	366746576487148	109728500065157	0.194592855699766	563887608671795	1.71164e+06	8.83459e+06	0.740277061123834
CFAP45	193612908319456	117392681826786	0.250305894467438	46899687311222	2.73247e+08	8.60615e+08	0.926079317758803
CFAP47	100936654519225	12635941308377	0.374121421798729	337749740381744	0.000731486436033496	0.00164397381561314	0.922866740464942
CFAP53	284070460483723	138405660386406	0.175472450951878	788760056838563	0.308052	3.44753	0.740277061123834
CFAP61	486575763631995	230804700782024	0.378578177383091	609661926045113	108335	527183	0.916910653286286
CFAP65	99867329109887	137150458655866	0.281064994188844	487967059191002	1.06263e+08	3.53306e+08	0.926079317758803
CFAP92	120697817873597	134334799573156	0.272628775001625	49273888852105	8.33358e+07	2.8127e+08	0.926079317758803
CGA	126459807923668	104616261603036	0.474904352327572	220289119462261	0.0276024183974583	0.0470635184128814	0.928448540372894
CGB7	108427396431878	110490982004498	0.374117492093056	295337652848948	0.00314318320154952	0.00252176468163257	250720538287654
CGREF1	116589790070297	195597678302574	0.225230593930577	868432990781275	0.000380982	0.00594804	0.709370283899155
CHAF1A	7411238291008	146706214713313	0.112233928003087	130714675431548	4.79318e-25	2.58335e-23	116063127897958
CHAF1B	271108713008337	258643160566744	0.187746968889025	137761563926833	3.54658e-29	3.14021e-27	0.896246230775245
CHEK1	341188384184777	165344465492611	0.137954247002009	119854567065416	4.23504e-20	1.94739e-17	0.90593063721884
CHGA	261255915176355	520025440782375	0.50023694425012	103955824686623	2.59695e-12	6.46584e-10	0.843887822532013
CHGB	615354050225442	465038745970134	0.567408497014779	819583683389961	0.0248856	0.31157	0.740277061123834
CHI3L1	25111795637309	120321160895744	0.360002807728929	334222840246129	0.000831086435083553	0.00178582876635589	0.95943424924746
CHI3L2	385511970711036	114087640100377	0.294129752213981	387882012076689	0.000104964332462912	0.000292294314273079	0.843887822532013
CHKA	187567890124626	11258989475904	0.127039890462021	886256232979822	7.81961e-05	0.00159782	0.572985601436948
CHML	588792844348265	172697041866924	0.1661270445176	103954803005376	2.59974e-11	5.77478e-10	0.947962011920702
CHODL	153910815164651	239263241343343	0.402707087339995	594137150462762	28264.7	1.30326e+06	0.922866740464942
CHP2	214427743051576	679231971492233	0.799787574787797	849265471112688	0.0020197	0.0228117	0.926079317758803
CHRFAM7A	255983535842018	183505808180553	0.437970236388915	418991504293915	2.79059e+09	4.19943e+09	176514789994648
CHRM1	216022929589193	110478836794128	0.516527935308178	213887438107705	0.0324458433895509	0.0302326055809892	176514789994648
CHRM3	168920401245946	127736029241907	0.251549377470452	507797039795542	3.81488e+07	1.03887e+06	121585773816799
CHRM4	245798530030449	105334170687613	0.360026857011205	292573091802246	0.00343648031882938	0.00380361912398311	176514789994648
CHRNA1	676416713577191	133618067504226	0.371031011521383	3601264135748	0.000316673641419206	0.00074954763007518	0.92693109113931
CHRNA3	576084263530571	277502303815058	0.457413409663306	606677237598526	1305.06	625741	0.922866740464942
CHRNA5	184835410491909	174972133149597	0.259310332380902	67475958841694	1503.15	9072.39	0.928448540372894
CHRNA6	200024531277533	116939309255895	0.424279912226102	275618302649165	0.00584802633062612	0.00508847233597457	22004558832929
CHRNA7	238813645835054	126609758948434	0.44102173411972	287082810558413	0.00409398082474492	0.00448185094332263	176514789994648
CHRNA9	0.872273603697305	168142372900103	0.679351178790059	247504351430683	0.0133219943311041	0.00965374989151647	250720538287654
CHRNB2	767747460747216	198873219416336	0.297809132225279	667787511854732	2424.31	14257.7	0.926079317758803
CHRNB4	11762704377003	246624388560658	0.294342696145924	837881801688704	0.00534619	0.057882	0.922866740464942
CHRND	882061634583386	442320329169154	0.573393922707092	771407424551839	1.21864	10.3441	0.926079317758803
CHRNG	125454979819054	128246203484485	0.348228730697376	368281512061495	0.000230672455315509	0.000306274172880568	176514789994648
CHST1	182582745644327	135967934410241	0.206236215087487	659282533635339	4315.34	28493.1	0.794886437342711
CHST10	138045321677937	125699551794182	0.209065325708922	601245335006874	182736	916756	0.864675952044456
CHST5	295198248033726	263528984326287	0.616842734891411	427222320082408	1.93534e+09	2.41462e+09	22004558832929
CHST6	958809883231984	25087321391394	0.33055912122955	758935989969935	3.2149	26.1301	0.92693109113931
CHTF18	453080297204796	171594659638488	0.131979081847575	130016558106281	1.19723e-24	7.63942e-23	0.946412670017622
CIART	335202444096185	150971237951491	0.186684687371623	808696417885422	0.0611702	0.567837	0.972157883339661
CIB2	129491443015762	168801827478371	0.233557882047113	722740872621546	49.2297	40.6619	0.794886437342711
CIB3	173675415106959	212251225253034	0.444765980139433	477220009467661	1.82224e+08	2.60027e+07	22004558832929
CIP2A	14062899305813	217659305748702	0.182411146399289	119323467915857	8.02779e-19	2.72319e-17	122009024194229
CITED1	88119873199216	104745748906932	0.262756359526446	398642107447793	6.70774e+09	0.000175534837198457	0.928448540372894
CKAP2	499333289937892	12305848017146	0.129755711630402	948385844639974	2.4505e-08	3.9247e-06	0.946377764541293
CKAP2L	202504874030106	320344295511847	0.194981478008972	16429473136782	1.17677e-46	2.5623e-44	0.864675952044456
CKB	266669497314407	209303905185925	0.281893605767984	742492560679773	11.2843	82.012	0.978648097738888
CKLF	288544772345528	105110630848106	0.132161718000994	795318284583096	0.18178	1.79832	0.864675952044456
CKMT1A	166012958973954	356168947953538	0.500630686519907	711440504035853	112.397	76.8013	0.92693109113931
CKMT1B	392596397409737	433106176662826	0.595731391681275	727015871096725	35.9065	284.41	0.843887822532013
CKMT2	926866783234417	107472547014433	0.286199071461922	375516756450176	0.000173225546114658	0.000493401290885332	0.794886437342711
CKS1B	108488469839101	124936532633095	0.111311222260989	112240733769107	3.10625e-15	8.00321e-14	118876714947973
CKS2	76989826218688	136046696415397	0.145369240971589	935869895901745	8.07246e-07	1.04336e-05	111379738450843
CLCN1	142212471954152	212609808413544	0.328413856559929	647383793852643	955.444	52478.1	0.92693109113931
CLCN2	313280161421638	104221294508698	0.10878759582671	958025533303581	9.68053e-08	1.55724e-06	0.972157883339661
CLCNKA	377776247240664	267023217621982	0.315786510814125	845581456071614	0.00277146	0.0311908	0.916910653286286
CLCNKB	345791798800267	153642538640931	0.417295852271676	368186114969826	0.000231537508090924	0.000299764713566117	181201088751161
CLDN15	204728976242359	181239424933532	0.205017482083151	88401936796797	9.55528e-05	0.0013079	0.862329573726731
CLDN18	961992564340403	260185944587993	0.394825862551871	658989112076747	4401.49	25018	0.928448540372894
CLDN19	45800394780486	27379166604738	0.394215118964325	694523504747054	377.831	2454.52	0.916910653286286
CLDN4	165084802602417	144896988912602	0.349741876730615	414296938837001	3.42838e+09	7.41914e+09	118876714947973
CLEC18A	389214897731703	173602459397849	0.281218196906636	617322994413072	6690.88	176396	181201088751161
CLEC18B	686013431616081	112171330961763	0.257824551517706	435068461484591	1.35713e+09	3.90762e+09	0.926079317758803
CLEC18C	0.887443794204009	124858716651211	0.474026155504286	263400479491226	0.00843842962556754	0.00713610065210805	22004558832929
CLEC2L	338432090963792	621458819736939	0.636339208168783	976615634804799	1.57307e-08	3.51977e-07	0.745029512844227
CLGN	560589346310632	135407073588225	0.283076237730408	478341363704225	1.72343e+07	5.46748e+08	0.946377764541293
CLIC3	512752759652001	106545481270395	0.266801604160226	399343480732633	6.5123e+09	0.000211280273574834	0.740277061123834
CLIC5	146168753798411	141488101371329	0.234887222745003	60236610454086	170515	830376	0.896246230775245
CLIP2	862599544455117	124013990633291	0.197785923623503	62701120666888	36078.8	149428	116063127897958
CLK2	136340152327679	104244773232144	0.0869149842051998	119938781770966	3.82565e-19	1.4529e-17	111379738450843
CLN3	161205517887538	11136548016537	0.118103367988005	942949232207168	4.12079e-07	5.53351e-06	111379738450843
CLPS	370909708961682	405401468153542	12830446416134	315968326436218	0.00157940735544299	0.00179658990566399	181201088751161
CLPSL2	19113362470533	260270409613414	0.659733061116033	394508665630806	7.97711e+09	9.18329e+09	22004558832929
CLSPN	790209746378212	281428464165848	0.226306328963508	124357310489195	1.67204e-21	9.73144e-20	0.843887822532013
CLTCL1	622841842353912	114126567161136	0.162690569161876	701494670213986	230.037	12.2802	115299650756476
CLUL1	100554929998458	190336883879615	0.294756495244575	645742797700462	10649.7	58105.7	0.928448540372894
CLVS1	260235942175183	259242495947713	0.287007092010268	903261637654719	1.67615e-05	0.000233106	0.916910653286286
CLVS2	218197350835179	358012344550382	0.730585794797943	490034636725173	9.56678e+07	3.2302e+08	0.916910653286286
CMTM4	548098213629333	127543711952679	0.152317357835757	837355070787195	0.00559076	0.0489066	115299650756476
CNBD2	14919137974729	112550034675307	0.163660268232583	687705304963561	611.034	3876.54	0.922866740464942
CNFN	441606924436426	203614793978929	0.293188482545824	694484286050032	378.882	2459.82	0.916910653286286
CNGB3	506067765155947	242636694357169	0.425521929509543	570209612079998	1.18343e+06	5.06605e+06	0.922866740464942
CNIH2	253060678842505	168113865355784	0.212091426629669	792648095339215	0.225443	2.55919	0.740277061123834
CNIH4	161987485327181	109663049772562	0.0999998730335969	109663189007969	5.54856e-14	1.72578e-12	0.862329573726731
CNNM1	272929547012879	263356031141118	0.354347062962712	743214940005954	10.6847	84.1763	0.900484214151191
CNR1	461388510258171	266648470280121	0.363468235420313	733622485529635	21.9703	1.68369	0.896246230775245
CNTD1	332949113603043	103244225254504	0.133990890690088	770531673629225	1.30519	11.3963	0.896246230775245
CNTN5	981332153564647	112067342602498	0.426577374372858	262712814450734	0.00861088996407787	0.0160993738956731	0.928448540372894
CNTNAP1	180298137434594	156917786280231	0.20268122697902	774209770777016	0.977898	6.45635	122009024194229
CNTNAP3	538659655845031	129223152861279	0.286513395738119	45101958506468	6.47678e+08	2.12041e+09	0.843887822532013
CNTNAP3B	877646945138573	15996607009174	0.296013238050298	540401744007673	6.51646e+06	1.96122e+07	121585773816799
CNTNAP4	634140438037362	453413439575028	0.529437391325444	856406153029557	0.0010896	0.00137967	0.843887822532013
CNTNAP5	132546557689463	246979958145244	0.665042094008371	371374925542886	0.000204211136354125	0.0001964284962968	250720538287654
COA6	148708554430631	128032836444376	0.114245926546057	112067747459478	3.77707e-15	9.44186e-16	121940613765583
COCH	234083043848498	435200811704788	0.322670336546285	134874750608617	1.8534e-27	1.49297e-25	0.896246230775245
COG2	107249270509114	101789992307224	0.0824604850442861	123440933257374	5.24215e-21	2.07122e-19	121207511092582
COL10A1	657007611140803	170765124977066	0.404422798664519	422244061266983	2.41671e+09	6.82025e+08	0.916910653286286
COL15A1	102382931231055	380338842524296	0.195935063901697	194114741358961	6.17304e-70	7.9579e-67	0.709370283899155
COL1A1	186430608434841	180296611885223	0.253260723717832	711901195094502	108.703	626.423	111379738450868
COL1A2	109704716669834	142076640347261	0.233285221610298	609025464050181	1127.31	74205.9	0.6669467798541
COL21A1	145797095275939	141069482797526	0.232992463839038	605468007304232	140697	775002	0.794886437342711
COL22A1	143898718716923	43804700143062	0.415290671931145	105479614890856	5.19111e-12	9.76091e-11	121585773816799
COL24A1	452122826949083	40109717889937	0.374115933472398	107212001150697	8.09461e-13	2.62781e-11	0.745029512844227
COL2A1	409707890145658	815349978769157	0.608022144241879	134098730858855	5.29293e-27	3.91333e-26	0.947962011920702
COL4A1	917372910391945	178949859083901	0.153363317065525	116683612814298	1.84951e-17	7.1192e-16	0.95943424924746
COL4A2	103581030764275	165323850131273	0.155795293393909	106116074837558	2.63182e-12	6.38525e-11	0.95943424924746
COL4A5	357106484998949	176175064402915	0.316875843263807	55597505505096	2.70161e+06	1.12248e+07	0.90593063721884
COL5A3	262529766069713	130669534190976	0.21936166872249	595680799439414	257212	1.10522e+06	0.998495350515408
COL6A5	152821329257323	104018635018813	0.527638900462047	197139814611328	0.0486783529463566	0.0345453842162195	229346620018431
COL7A1	824042562258666	33488592239158	0.304455187157309	109995144283269	3.84195e-14	9.21298e-14	116063127897958
COL8A1	298367014462982	168287658330023	0.222606382168637	755987571832219	4.03455	33.4037	0.896246230775245
COL9A1	264356931512789	389141632167498	0.299972513336079	129725763150678	1.75046e-24	1.38406e-22	0.745029512844227
COL9A2	185173026142032	178111000199087	0.267233150350144	666500394751609	2646.58	17930.4	0.794886437342711
COLCA2	119709326407481	276550494903443	0.234222525681944	118071690200701	3.58427e-18	1.56099e-16	0.896246230775245
COLEC12	154016539213974	213952334794682	0.278319418073801	768729455800851	1.50279	14.6338	0.794886437342711
COLGALT2	405355211349271	130882818730946	0.270857275065846	483216921897808	1.35053e+07	4.84069e+08	0.843887822532013
COMP	127972806671292	343709979958676	0.414350648853411	829514762218398	0.010845	0.132395	0.794886437342711
CORIN	533952513782862	218631788189285	0.305502801339593	715645772250242	82.7884	709.195	0.745029512844227
CORO6	309514114879213	115730415251031	0.211689159778841	546699771362589	4.57722e+06	2.23151e+07	0.745029512844227
COX4I2	94504267709223	286546358632103	0.2005030715036	142913700265663	2.47688e-32	1.93959e-31	122009024194229
COX6B2	402773305864833	136894333963615	0.323382879049519	423319670991775	2.30393e+09	2.84601e+09	22004558832929
COX7B2	236163587994247	925068501568855	0.705608034486872	13110231975201	2.87717e-25	1.86346e-23	0.972157883339661
COX8C	145854886749762	121313087026071	0.554623266909662	218730612767153	0.0287201837090152	0.0270366386863272	176514789994648
CPA1	108241905318931	299163777069732	0.582698488624062	5134109370631	2.83483e+07	1.01471e+08	0.92693109113931
CPA2	139679072787681	485985235511727	0.71016833157918	684324003058622	774.218	4845.95	0.92693109113931
CPA4	112816662175089	139417452815427	0.342749142609712	406762367817741	4.7495e+09	0.000128437299017337	0.916910653286286
CPA5	756975703559712	227518936507226	0.375913175911241	605243314378922	142674	686470	0.916910653286286
CPA6	194802845700724	513946978357263	0.503707049915968	102032913464881	1.91665e-10	4.06562e-09	0.922866740464942
CPE	267180843642097	131153413016895	0.205735690716114	637484981630474	18314.2	90654.7	0.995031561367341
CPLX1	468102774198754	152085865625344	0.230693760473826	659254352232902	4323.54	24223.8	0.945542994669583
CPLX2	276989986898835	925736656531368	0.541161761481109	171064683875245	1.32812e-51	3.20407e-50	0.995031561367341
CPNE4	403197010065151	178998045020171	0.443805978602886	403324997071156	5.50107e+09	6.48863e+09	22004558832929
CPNE7	136872830525643	273596601434153	0.303885906871169	90032671883709	2.19098e-05	0.000319715	0.864675952044456
CPNE9	435197589455559	1370817955823	0.297440188764309	460871801325149	4.05159e+07	5.31164e+08	229346620018431
CPSF4L	458852551941697	121151493049645	0.310678387819743	389957904377752	9.63601e+09	0.000246855181705778	0.928448540372894
CPT1B	674979979673118	107163894111836	0.16446661844761	651584468163504	7228.17	49896.4	0.740277061123834
CPT1C	862137519830127	10125246108678	0.177977362700644	568906402198381	1.27738e+06	5467.74	0.916910653286286
CPXM1	136914565344579	240198869291031	0.244491078436104	982444311782137	8.8361e-10	1.90094e-07	0.794886437342711
CRABP1	188934783939587	295695755293085	0.738744528595593	400267946288853	6.26291e+09	8.78261e+09	181201088751161
CRACDL	111879416207539	132576289637188	0.168960377599706	784659051551614	0.4275	2.93577	122009024194229
CRACR2B	336679434626822	134635225405637	0.230767704814136	5834231679605	540390	2.56284e+06	0.864675952044456
CREB3L1	259920487862975	204730724691574	0.286698689641869	714097176193286	92.6734	658.794	0.900484214151191
CREG2	110645195487395	324937478534978	0.322747827376642	100678440247339	7.66396e-10	1.55388e-08	0.916910653286286
CRH	0.708938578505757	134533920198245	0.618035066107077	2176800760605	0.0294954362858101	0.0200675967701498	250720538287654
CRHR2	152043637889996	175093976777944	0.206588899160779	847547847387847	0.00234115	0.0262182	0.92693109113931
CRIP3	336115383136825	214642008893466	0.194523563590111	110342420698064	2.61245e-14	8.18382e-14	0.896246230775245
CRISP2	648754844109326	421614331721184	0.857445433689971	491709810508628	8.78365e+07	2.94745e+08	0.928448540372894
CRLF1	605833762990664	156292846592981	0.20807756159857	751127826528967	5.85528	47.4516	0.896246230775245
CRLF2	139102253573837	269346913871137	0.428721725509901	628255807542266	33304.7	171618	0.928448540372894
CRYAB	678311034910676	117679310031965	0.277081566389266	424709992676451	2.16555e+09	5.10924e+09	111379738450843
CRYBA2	318048888042079	299158413804564	0.557748819250388	536367632667751	8.1545e+06	1.70413e+07	176514789994648
CRYBG2	145782977458054	257145893166146	0.22021056387162	11677273271779	1.66553e-17	7.1192e-16	0.864675952044456
CRYGS	759505016390372	131334421509647	0.134562518514653	976010429645351	1.66983e-08	3.12487e-07	0.896246230775245
CSAG1	191417890523541	570968095047225	0.574206936728008	994359452187674	2.68944e-09	3.9785e-08	122009024194229
CSAG2	163423631986475	328050052719835	0.675122252211057	485912072436445	1.17908e+08	3.89525e+08	0.926079317758803
CSAG3	302841051871969	277977904536339	0.599555744831414	463639798188411	3.54533e+08	1.34945e+08	0.745029512844227
CSKMT	949699180943294	109847625712845	0.136095672467284	807135331501823	0.0695232	0.516903	122009024194229
CSMD1	111847888940219	656075557983313	0.522515119195885	125561066824816	3.68e-22	2.11399e-20	0.896246230775245
CSMD2	70484238003962	313098752178586	0.284012229064134	110241292500079	2.92334e-14	1.09117e-12	0.740277061123834
CSN2	298079805864844	379509956926157	104272354421797	363960283653887	0.000273058873336545	0.000357931533479083	176514789994648
CSN3	142189772708028	189375430422252	0.86469122334043	21900931258521	0.028517483675127	0.0194696811542155	250720538287654
CSPG4	500096724511476	211546806651163	0.157180035739467	134588852621087	2.73004e-27	2.0671e-25	0.946377764541293
CSPG5	640149320903074	253675209436538	0.222245282733875	114141999468353	3.55157e-16	1.57295e-14	0.745029512844227
CST2	174239000509639	308918325672156	0.408421359263438	756371621281684	3.91714	31.4282	0.928448540372894
CST4	365445877656494	344384581438531	0.866542143445199	397423926860991	7.06046e+09	8.19069e+09	22004558832929
CST5	569673161671347	17429729067708	0.561640755978502	310335902125578	0.00191337370725914	0.00401014902641716	0.928448540372894
CSTL1	357110376928753	246213483064914	0.485416178590517	507221419318644	3.93213e+07	5.8732e+07	229346620018431
CT45A1	174959862232313	303003498073005	129500708923204	233978254321905	0.0192949707265791	0.0152820273425739	22004558832929
CT45A10	255485152347309	357689854642631	123796947395543	28893269355001	0.0038606745307463	0.00332477498197339	229346620018431
CT47B1	146362588181582	271238329101893	0.843679125351941	321494654722844	0.00130468814321211	0.00154052625607449	176514789994648
CT55	36861619529099	398078491910381	0.898692815249503	442952792272922	9.44396e+08	1.17815e+08	229346620018431
CT83	551557614903756	439108589115094	0.986468546391643	445131870368588	8.53446e+08	2.52161e+09	0.92693109113931
CTHRC1	331143681298302	402401893401367	0.284315751514547	141533450488683	1.78081e-31	1.78909e-29	0.90593063721884
CTLA4	512151046369206	114132211571283	0.266495014981758	428271469089565	1.84627e+09	6.47408e+09	0.740277061123834
CTNNA2	358357173089732	587385839429177	0.555722721908702	105697646734998	4.11526e-12	1.03457e-10	0.90593063721884
CTNND2	410867068716292	2421887889406	0.457858341264391	528960088991254	1.22584e+07	4.52011e+07	0.945542994669583
CTRB1	0.885004820052957	173761268266654	0.692327218686419	250981419734354	0.0120794701126674	0.0121966679855752	176514789994648
CTRB2	117810441597469	134128464288614	0.55318422475619	242466177244533	0.0153226548388905	0.0109903774477827	250720538287654
CTRC	216314562059441	162283876302107	0.362964201826182	447107112727943	7.78288e+08	1.25648e+09	176514789994648
CTSE	577243356638907	129111977477437	0.448328489326042	287985217427353	0.00397861669957462	0.00800625643655862	0.916910653286286
CTSV	134425387089543	382514552535094	0.321823681746765	118858422866495	1.40214e-18	4.66238e-17	121585773816799
CTXN1	333349942229493	210443264540106	0.283822273629865	741461414739234	12.1979	101.753	0.843887822532013
CUEDC1	837448672307112	104870147800696	0.116580929892832	899548046984173	2.35201e-05	0.000250034	119634206973591
CUL7	170262996050204	115589112669907	0.0936171006000951	123470083915192	5.05567e-21	2.0418e-19	118876714947973
CUZD1	134342414836135	15618569998823	0.20745522441395	75286462623174	5.12691	40.4751	0.928448540372894
CYB561D1	233820924382612	120721406453098	0.119775789367365	100789489337309	6.84544e-10	1.42268e-08	0.896246230775245
CYP11B2	338806119199862	368266949350736	160193526423361	229888783631292	0.0215113092918379	0.0202343587105314	181201088751161
CYP17A1	328478901289479	421158536214396	0.38381428965154	109729769727115	5.15468e-14	1.40913e-12	0.995031561367341
CYP19A1	312607976756887	500048907963252	0.48863723946708	102335407041145	1.40294e-10	3.28459e-09	0.843887822532013
CYP24A1	296934367902917	180443632716555	0.633264047546089	28494217130402	0.00437987832602405	0.00477083184141053	176514789994648
CYP27B1	508131409478352	167555604320397	0.22456526935109	746133205747136	8.56521	6.86343	0.896246230775245
CYP27C1	299868768578855	158234079571318	0.269860426104905	586355257253637	453067	2.09223e+06	0.896246230775245
CYP2F1	107660011162637	146953863595439	0.419164815379812	350587306480582	0.000455112208585818	0.000563871486954582	181201088751161
CYP2W1	176029449788393	276901940642688	0.323265566494188	856577283023636	0.00107353	0.0124609	0.92693109113931
CYP4F8	131540059125604	172891082636951	0.522490854836798	330897815792305	0.00093637141778635	0.000920578780659095	22004558832929
CYP7A1	366222138093046	185429146132195	0.346193391374365	535623009428497	849763	2.74117e+07	111379738450843
CYTL1	112565910404054	160125823922164	0.250515745547698	639184669099677	16389.4	87673.2	0.922866740464942
DACH2	784586628648916	476688821449629	0.521711173696664	91370253405151	6.41937e-06	9.19516e-05	0.928448540372894
DAGLA	210023602591855	143179589128655	0.22014876641518	65037652247677	7833.41	33422.7	122009024194229
DAND5	695866810020005	30385539807445	0.349140589390895	870295254426162	0.000323359	0.00392921	0.92693109113931
DAPK2	543149213936541	161827042594064	0.169442396338086	955056385482019	1.28992e-08	2.10229e-06	0.947962011920702
DAPL1	673077740955455	231174874991801	0.61327103197552	37695384738314	0.000163549697153585	0.000408859475207562	0.916910653286286
DBF4B	199454243789398	155695816502703	0.116834002183788	133262418125318	1.62899e-26	1.37127e-24	0.794886437342711
DBN1	117928086796115	176114294948549	0.203279945364981	866363352431758	0.000456961	0.0042216	121207511092582
DBNDD1	153920223070071	159431034744257	0.206973305783056	770297571182291	1.32934	9.43222	111379738450843
DCAF12L2	109942501215343	225038964447743	0.718123661858232	313370769409585	0.0017261271248158	0.00156626248024351	229346620018431
DCAF13	162901838113843	10508206164984	0.115645870331162	90865381832423	1.02243e-05	0.000120826	111379738450843
DCAF4L1	172489881940897	214825042540493	0.241047521630312	891214483714812	5.00547e-05	0.000660489	0.922866740464942
DCAF4L2	424499194617035	959908962806339	0.75720408966899	126770176746663	7.92918e-23	4.46927e-21	0.946412670017622
DCAF8L2	233568560407868	660823427043339	0.731786871638587	90302716904944	1.71246e-05	0.000236305	0.922866740464942
DCDC2	142078985327496	165892546630632	0.313761549133778	528721722239779	1.24191e+07	3.61505e+07	121207511092582
DCLK3	101219375059072	13766024974189	0.230371101686093	597558672656207	229264	1.06158e+06	0.928448540372894
DCST1	19803502842009	221512355092564	0.223166087537798	992589678550718	3.21202e-09	6.12891e-08	0.928448540372894
DCST2	725864818534462	188694005454514	0.18423076446369	102422636091109	1.28201e-10	3.01387e-09	0.843887822532013
DCX	127256168209462	232901476696589	0.388362159001003	599701776547151	200974	939050	0.92693109113931
DDIAS	951061379959148	157235676651751	0.148518820172797	105869193189666	3.42685e-12	9.09301e-11	0.864675952044456
DDIT4L	343671666553602	168642874133745	0.299350814820894	563362001318241	1.76466e+06	803151	0.843887822532013
DDN	648133691374619	22187492817067	0.374166848602635	592983929493714	303231	1.38805e+06	0.92693109113931
DDR1	174034885569998	117956974081918	0.242274375508163	486873503788863	1.12315e+08	3.98097e+08	0.862329573726731
DDX11	512626205851866	126143448270515	0.146700017273161	859873438430692	0.000806	0.00764494	115299650756476
DDX39A	244613603091595	14785822556644	0.117722699290171	125598738780182	3.50892e-22	1.86096e-20	0.978648097738888
DDX39B	193832735317562	100101962040014	0.123530206792652	810344001188609	0.0534266	0.824035	0.572985601436948
DDX4	200824006982502	201468356401116	0.486137443870856	41442674071129	3.40902e+09	3.96127e+09	229346620018431
DDX53	260050255607725	674263614571052	0.714890141361851	943170951115081	4.03459e-07	7.94714e-06	0.740277061123834
DEFB124	0.586823420986728	109569005116556	0.435200528146323	251766709896355	0.0118134918285774	0.00864568365303663	250720538287654
DENND4B	163431478385367	105397086289072	0.0812333629093697	129746058164133	1.70471e-24	9.09984e-23	111379738450843
DEPDC1	214220676250089	37688640746574	0.220018436008664	171297648643816	8.90137e-52	2.41913e-49	0.90593063721884
DEPDC1B	230353061865947	322047760176155	0.230383392767913	139787749588611	2.10073e-30	1.98801e-28	0.90593063721884
DERL3	429587401883387	126675067838304	0.24286154279564	521593770590913	1.8289e+07	6.5662e+07	0.946377764541293
DGAT2L6	0.967310035789801	169130181306593	0.676710608722941	24992985055424	0.0124439442373884	0.00907113556028792	250720538287654
DGKI	231631821550137	23205800173753	0.219221422478289	105855531413912	3.47721e-12	8.61725e-11	0.92693109113931
DGKK	110685950373971	331739367932765	0.535561203500857	619423822644828	58567.6	294097	0.922866740464942
DHDH	232388197329474	200909023662559	0.271056237094924	741207897725667	12.4335	94.669	0.92693109113931
DHRS2	354512666998653	140852016068168	0.377408534237899	373208349282802	0.000189902531717465	0.000442624435764974	0.978648097738888
DHX34	105385812862039	116374251039134	0.0935062993942706	124456054611295	1.4776e-21	1.01785e-19	0.709370283899155
DIAPH3	148763620554523	339778526609582	0.21690416439546	156649148510628	2.62781e-41	4.38815e-39	0.864675952044456
DIO2	127797757386765	414525938596895	0.400721285566195	1034449512736	4.43246e-11	7.58328e-10	122009024194229
DIPK2B	42860426892407	221158424143525	0.120182049679439	184019514339637	1.26718e-61	5.5806e-59	0.947962011920702
DIRAS1	662969501979426	356275353023981	0.378295291378622	941791666836789	4.60127e-07	9.01544e-06	0.740277061123834
DIRAS2	521572547540447	140744974297133	0.396895090408211	354615054956652	0.000390902814410747	0.000922081736011252	0.916910653286286
DISP2	115399949863471	156172682586123	0.234846703928199	66499840097339	2931.25	13194.1	121585773816799
DISP3	793951473041178	206158683903495	0.364985435532125	564840850712107	1.6194e+06	6.81185e+06	0.922866740464942
DKK1	59475064710034	554115119828991	0.456061247508505	121500154388508	5.73548e-20	2.65954e-19	0.945542994669583
DKK2	449201368743982	178538813134189	0.290495388743888	614601195241676	79455.3	478293	0.745029512844227
DKK3	13472043829696	117816339537594	0.244282433812212	482295585887946	1.41446e+08	3.65717e+07	118876714947973
DKK4	246012986165873	494574370686256	0.517639754681054	955441243091907	1.24287e-07	2.13905e-06	0.896246230775245
DKKL1	127285402343213	201549349253295	0.297487637534261	677504957597047	1243.64	758.95	0.926079317758803
DLG5	691241848394447	161329270268901	0.172107884403798	937372920640821	7.00141e-07	8.84919e-06	114845450627745
DLGAP5	251121997093241	371707340777403	0.200035861811366	185820351116802	4.49145e-63	2.01646e-60	0.972157883339661
DLK1	283272304340188	64384155406319	0.680350804094642	946337610227367	2.98158e-07	4.50467e-06	0.998495350515408
DLK2	731142613616019	198528994280798	0.198898268069022	998143403701758	1.83791e-09	4.46009e-08	0.740277061123834
DLL3	274809982666909	291213147387696	0.51684886284174	563439659684162	1.75672e+06	3.10396e+06	229346620018431
DLL4	619647164306081	10742379767856	0.127196488285525	844550027493057	0.00302746	0.0328988	0.945542994669583
DLX1	986086585613719	424809468853261	0.49467546517042	858763975098118	0.000887741	0.0104811	0.916910653286286
DLX2	481676233626777	359571855195751	0.555400249980667	647410322930657	9537.67	5244.8	0.926079317758803
DLX3	519107823056385	206129117062964	0.541742326572668	380492915085738	0.000141844785482752	0.000357931533479083	0.916910653286286
DLX4	135986193087749	271005368857901	0.376883269370396	71906977805258	64.461	455.166	0.922866740464942
DLX5	122653136017222	479587436918784	0.491753213059194	9752604033541	1.79796e-08	3.26189e-07	0.922866740464942
DLX6	158352641746083	568370209192729	0.711949607737439	798329267992713	0.142481	1.34421	0.916910653286286
DMBT1	343496627873481	339180123728589	0.470099770053594	721506678656577	5.39075	473.729	0.740277061123834
DMC1	198126064321074	233635870798957	0.279452781151483	836047756748964	0.00624649	0.0672793	0.922866740464942
DMKN	475625746582376	208845216711408	0.388574979892296	537464395595658	7.67342e+06	2.90272e+07	0.945542994669583
DMP1	10210561232457	193279844363784	0.495238967122842	390275921716479	9.51023e+09	0.000130069733946491	181201088751161
DMRT2	249059213920565	201618516991187	0.675990452063627	298256456693577	0.00285844348417729	0.00320504532464346	176514789994648
DMRTA2	0.996094900865959	120230417832711	0.556734108451275	215956622753308	0.0308062652400032	0.0235527794837903	22004558832929
DMRTB1	102486721849403	227405165488462	0.888038182553025	256075887226711	0.0104443818665195	0.00870011172154011	22004558832929
DNA2	165260170543022	137835025577141	0.139484035424607	988177787927868	4.99389e-09	1.09284e-07	0.794886437342711
DNAAF1	710786617002864	171579411728202	0.347204345955609	494174147665014	7.74278e+07	3.23708e+07	0.740277061123834
DNAH11	118693785517401	157850447771925	0.283713900318604	556371921131332	2.64085e+06	8.30001e+06	122009024194229
DNAH12	422270344124466	269312013931428	0.310878396980923	86629375520086	0.00045976	0.00678743	0.745029512844227
DNAH14	294567590314355	128112908069571	0.108504535975163	118071476844891	3.58518e-18	1.54784e-16	0.90593063721884
DNAH17	647289228753056	154102800166886	0.186462650319287	82645398369598	0.0140235	0.150317	0.896246230775245
DNAH3	991771844789014	214105311061003	0.341188068014583	627528718418876	34899	181553	0.916910653286286
DNAH8	118104605872869	221040909004841	0.322990969402165	68435631316248	772.473	4840.94	0.926079317758803
DNAJB13	657591855824524	194962526058278	0.338635002520231	575730578963497	854670	3.70981e+06	0.92693109113931
DNAJC5G	270383533581899	20491097984204	0.41354093614279	495503496590449	7.23173e+07	1.08554e+08	22004558832929
DNAJC6	207150038679492	258345051187768	0.204329744239907	126435361698707	1.21466e-22	7.16987e-21	0.896246230775245
DNASE1	285503391319214	107785101637184	0.125522237906084	858693275671427	0.000893219	0.0107826	0.896246230775245
DNASE1L2	42700835966625	269251460408566	0.270823617094724	994194905514431	2.73424e-09	6.48971e-08	0.745029512844227
DNER	426109152372398	525946935680672	0.577956906661049	910010642002969	9.02434e-06	0.000132261	0.896246230775245
DNM3	728789271530331	156412429223141	0.154437845636567	101278561986173	4.15662e-10	9.2918e-09	0.843887822532013
DNMT1	168167466364655	117127609899516	0.121131654732942	966944686405431	4.0657e-08	5.60405e-07	118876714947973
DNMT3A	107532378264649	130903129465841	0.120880271409773	108291558199841	2.50454e-13	8.98047e-12	0.709370283899155
DNMT3B	125615209275027	17049770153764	0.163006043004912	104595939141043	1.32422e-11	3.1989e-10	0.896246230775245
DNTT	202194389489686	227799186656501	0.643848450470788	353808705278287	0.000403037157612792	0.000403054105568991	229346620018431
DOCK3	267934659297875	253692792500531	0.263510754941142	962741701215177	6.12497e-08	1.30668e-06	0.740277061123834
DOK7	135193420626463	141324208259827	0.272129731647517	519326599869216	2.06637e+07	8.70028e+07	0.794886437342711
DPEP1	784174139435778	192798294535143	0.374392248063897	514963372057421	2.60996e+07	1.15216e+08	0.745029512844227
DPF1	735352394329697	232721540115952	0.297611782015566	781963464416135	0.0529769	4.69106	0.922866740464942
DPP6	395355964234109	122885480502915	0.325400442768072	377643863842256	0.000159086728660797	0.000210938101505888	181201088751161
DPYSL4	378112106195826	186540520809321	0.326496606619446	571339845582979	1.10742e+06	5.16777e+06	0.843887822532013
DPYSL5	175149652963393	260074576911683	0.574159674170933	452965592345408	5.90798e+08	9.6816e+08	176514789994648
DQX1	950451217714263	612593233355897	0.510084468804681	120096429281886	3.16207e-19	1.53672e-17	0.864675952044456
DRC1	780935202454763	233364876531878	0.304424810312934	766576404505237	1.7777	14.9709	0.916910653286286
DRC7	409388870934952	12492719349343	0.204179229481614	611850646172994	94456.5	472992	0.896246230775245
DRD4	407043256902228	139689796098552	0.207980962947511	67164703018423	1861.79	11243.9	0.916910653286286
DRD5	100359861672907	156977092274999	0.603673385680558	260036463423063	0.00931247511061271	0.0069291944181647	250720538287654
DRICH1	787752766893587	119971172576715	0.22978451688551	522102943239166	1.77931e+07	6.55325e+07	0.922866740464942
DRP2	483527409608836	35238245300159	0.419323843140703	840358731719793	0.00433043	0.0474524	0.922866740464942
DSCC1	167070541754763	20880590830144	0.138388272653995	150884106215782	1.93036e-37	2.97048e-35	0.794886437342711
DSN1	756205862472244	127369310111285	0.105286724955683	120973760143928	1.09041e-19	4.05441e-18	116063127897958
DSTYK	508872433256079	102730386076737	0.105776367870993	971203569799527	2.67932e-08	4.66686e-07	0.946377764541293
DTL	468597376640857	326923175889993	0.188592580416486	173348906498876	2.56555e-53	7.54497e-51	0.946377764541293
DTNA	78406731728689	174625830812481	0.208966121746678	835665749801177	0.00645203	0.00540834	119634206973591
DTYMK	117382251577933	132871081711349	0.11901546685147	111641860697963	6.10478e-15	2.53478e-13	0.709370283899155
DUOX1	160165657438763	229910827667553	0.232192952802218	990171428085463	4.092e-09	5.97334e-08	121585773816799
DUOX2	553177368472092	333708084659745	0.439901936613263	758596534557025	3.30021	21.7348	115299650756476
DUOXA1	869918999785866	117038561120662	0.362229665672213	323105952416863	0.00123332252880584	0.00269297407950007	0.916910653286286
DUOXA2	131853086656527	347792718417247	0.482339752833303	721053399339956	55.7329	30.5017	121585773816799
DUSP13	894740224048279	450734204895084	0.516948006966513	871914000674892	0.000280323	0.0034638	0.916910653286286
DUSP15	396954363255188	160972520212416	0.29177514519241	551700591584879	3.44824e+06	1.71728e+07	0.740277061123834
DUSP9	115285183704791	504949974177955	0.320616342810017	157493523178625	6.93883e-42	8.52234e-40	121207511092582
DYDC1	308231039679612	270730787550416	0.460333886238127	588118310739282	407344	971664	181201088751161
DYDC2	942157802385374	349057312549512	0.333888365013281	104543119535066	1.40011e-11	3.48999e-10	0.864675952044456
DYNC1I1	25525914297502	384707125175986	0.340307221841917	113047005906532	1.24378e-15	4.2871e-14	0.90593063721884
E2F1	892423780644065	368499396653277	0.204851891872465	179885766875267	2.39429e-58	7.26149e-56	119634206973591
E2F2	115844576100859	301002684527504	0.199455033561639	150912553648079	1.84891e-38	2.63226e-35	0.864675952044456
E2F5	23922926933746	118362375386623	0.143452626932279	825097301581657	0.015711	0.154945	0.972157883339661
E2F7	812675384191884	348752599203798	0.236195133960479	147654438665172	2.44706e-35	3.54641e-33	0.740277061123834
E2F8	14216535433566	364833853200163	0.223480477683415	163250883022091	6.54459e-47	1.46402e-43	0.794886437342711
EBF1	150575554686426	200511078521765	0.166993248423283	120071368402585	3.25935e-19	1.13894e-17	121585773816799
EBF2	489910524582945	518968115953729	0.275979144747218	188046135308187	6.92249e-67	4.23798e-62	0.896246230775245
EBF3	413751190739201	227577171193176	0.218128941404354	104331488397639	1.74991e-11	4.09047e-10	0.916910653286286
ECEL1	107446203059724	435683595473239	0.481533666792066	904783248855109	1.45834e-05	0.000215927	0.864675952044456
ECT2	547499574509943	239869794714078	0.170356471187824	140804627521084	5.00808e-31	4.65388e-29	0.947962011920702
EDA2R	738582527687731	111936746567263	0.262172600816999	426958218434873	1.95839e+09	6.04044e+09	0.843887822532013
EDARADD	703221558789448	222607093011191	0.297332405437164	748680900367702	7.05683	6.03492	0.843887822532013
EDDM3A	213731098642424	325807147284333	133841694586016	243427243126354	0.0149217595094121	0.011644468422212	229346620018431
EDIL3	256144043612647	259795343592936	0.216318648577328	12009844981075	3.15436e-19	1.53633e-17	0.864675952044456
EDN3	378048129898671	160975074993494	0.576927624570558	279021263912121	0.00526734349870726	0.00553646766947528	181201088751161
EEF1A2	396713499192901	397492940393207	0.399318988408582	995427094457361	2.41587e-09	4.36573e-09	0.995031561367341
EFCAB12	214451119040267	115900064296043	0.247881486888005	467562405531348	2.93061e+08	9.467e+08	0.896246230775245
EFCAB8	424894726937087	112802912331753	0.280724691559829	401827540374062	5.86257e+08	6.62385e+09	229346620018431
EFHC2	813887462787071	233534090003085	0.433002995059505	539335969191141	6.91523e+06	2.68156e+07	0.928448540372894
EFNA3	137258457604167	213302374385352	0.19723606776795	108145724460652	2.93659e-13	8.64988e-12	0.864675952044456
EFNA4	43795266557384	15599980173041	0.125848827479996	123958089124991	2.75353e-21	1.4158e-20	0.945542994669583
EFNA5	13274201172194	127256691380831	0.361609432046923	351917511278628	0.000432890875348673	0.00103661338277186	0.896246230775245
EGF	550178102724737	477396992478358	0.504867838354	945588045447293	3.20315e-07	6.39192e-06	0.740277061123834
EGFL6	153091862037644	416744721175852	0.374738452301478	111209489876577	9.9211e-15	3.13752e-13	0.922866740464942
EGFL8	366208814773888	118589605459563	0.159709833932925	742531643413819	1.12511	105.92	0.745029512844227
EGLN3	43371446617539	144487349519202	0.274806709533595	525778099684785	1.45804e+07	5.30892e+07	0.946412670017622
EHF	327484486124577	147174601869581	0.278898809062547	527698925514506	1.31324e+07	5.01678e+07	0.90593063721884
EHMT2	232077687063531	131766764153369	0.0961493197542373	13704388599958	9.55689e-29	6.27591e-27	118876714947973
EID2B	455284604862593	100305507353854	0.133615462228004	750702842929141	0.604846	51.9209	0.843887822532013
EIF5A2	293183768432509	140741144997494	0.229505192400627	613237302064235	86577.8	431628	0.90593063721884
ELAVL2	428860471117674	24664610595433	0.364932786900665	675867213930185	1392.62	3563.85	229346620018431
ELAVL3	2039121694669	171025057880167	0.348188042610949	491185902300681	9.02169e+07	1.28494e+08	229346620018431
ELFN2	299546386642081	372438977540458	0.328276394462393	113452865884673	7.82694e-16	2.75608e-14	0.90593063721884
ELL3	173429329294483	119919212315598	0.15080414939304	795198360245735	0.183549	1.6984	0.92693109113931
ELOVL3	136466262598445	247039699191603	0.365589581076103	675729594001142	1405.91	8617.41	0.916910653286286
ELOVL4	2074692060761	152222334124469	0.293435672529089	518758788979138	2.13035e+07	7.81549e+07	0.916910653286286
ELOVL7	397533038443995	170557717316396	0.318562611132618	535397787926195	8.60414e+06	3.1481e+07	0.972157883339661
EME1	100463005833889	325047958285823	0.189980423843274	17109550116278	1.25969e-51	3.45395e-49	0.864675952044456
EME2	316210178391616	121574729272064	0.116878085742032	10401841243396	2.43188e-11	5.72618e-10	0.896246230775245
EML6	114775185306259	201360161688257	0.197942779847683	101726449352284	2.62677e-10	6.33979e-09	0.794886437342711
EMX1	768157282040061	38587441867932	0.350950847960976	109951128746732	4.03408e-14	1.46662e-12	0.745029512844227
EN1	375576203978829	371955760962535	0.6676004973219	557153211321212	2.52509e+06	5.60306e+06	176514789994648
EN2	12856564044	394110242434016	0.555186957684502	709869417822274	125.941	854.031	0.926079317758803
ENAH	319776081075758	156368183735244	0.135917430323772	115046453838007	1.25002e-16	4.35474e-15	0.995031561367341
ENOX1	409931697440765	184430172751462	0.272535833945774	676718984367238	1313.08	8734.62	0.843887822532013
ENTPD2	204301512602811	170048185928882	0.22196516434715	766103034361416	1.84447	1.18063	122009024194229
ENTPD3	122777442743824	232002452386735	0.39501988073858	587318420412039	427503	1.92249e+06	0.92693109113931
EPCAM	199925785883831	177463388694861	0.426437068763094	416153757949804	3.16112e+09	9.27537e+09	0.862329573726731
EPHA10	517694065998717	346601485184705	0.405780378444252	854160288660489	0.00132373	0.0156879	0.896246230775245
EPHA5	264381586785969	254013235038026	0.793150886264521	320258401568892	0.00136200564713721	0.00156457487746507	181201088751161
EPHA6	840471872348731	131358053138931	0.572850106681764	229306151132315	0.0218444638617659	0.0381076913939	0.926079317758803
EPHB2	479516573993014	249292940949698	0.291077407472094	856448953268893	0.000108556	0.00123541	0.946412670017622
EPHX4	131343358554008	266272998491922	0.276926081777594	961530950001927	6.89018e-08	1.17977e-06	0.928448540372894
EPPK1	458830286850722	338898157333953	0.300614955824312	11273496237227	1.77384e-15	5.79592e-14	0.947962011920702
EPS8L3	76969931266937	494960996271599	0.323415880531096	153041648869808	7.17166e-40	8.56583e-37	114845450627745
ERC2	982556516904596	315343617939713	0.434353447846253	726006940898819	38.6892	278.831	0.928448540372894
ERCC6L	645531536298569	320410230025422	0.203817238077458	157204676624876	1.09512e-41	2.15222e-41	0.740277061123834
ERFE	632436504394475	268443346705921	0.21729648165414	123537824755575	4.64739e-21	2.59212e-20	0.843887822532013
ERFL	629008227047841	180227144686713	0.401175524239834	449247608084305	7.03998e+08	2.10815e+09	0.922866740464942
ERICH4	571521786604842	399046052191874	0.558800887059795	714111343472462	92.5779	639.978	0.92693109113931
ERICH5	17105242278322	15747390593512	0.280433041945504	5615383438508	1.96127e+06	6.41884e+06	118876714947973
ERP27	532072627575717	145637393025176	0.278661111156536	522632643000427	1.72911e+07	6.93857e+07	0.843887822532013
ERVMER34.1	33848440873834	238766567829458	0.396657655759984	601946198093641	174998	851045	0.896246230775245
ERVV.2	145746339710179	25834495758065	0.902487076491563	286258899778346	0.00420195233984955	0.00331189083391391	250720538287654
ESCO2	982290027670252	165753209656655	0.198170560934844	836416917198679	0.006054	0.0671776	0.896246230775245
ESM1	467360648079184	41777707434845	0.232079235007074	180014844643777	1.89667e-58	7.26149e-56	0.946412670017622
ESPL1	475526080214769	13682849340679	0.197056472489685	694361832819029	382.182	2409.85	0.945542994669583
ESRP1	2885890885369	194021156364824	0.51009626492481	380361844824375	0.00014259776192223	0.000379875447195863	0.864675952044456
ESYT3	47187132931051	200201619061264	0.274047271116639	730536809381529	27.6509	20.9764	0.896246230775245
ETV4	935806445142099	301992353499701	0.288530841247318	104665536687236	1.23041e-11	2.25467e-10	119634206973591
EVPL	174462919511746	270122143832061	0.393665778645837	686171261218715	680.398	4424.58	0.896246230775245
EVX1	151694513205945	5736252722687	0.522385726240413	10980875691169	4.72323e-14	1.40318e-12	0.916910653286286
EXO1	198397579545131	361634799079131	0.193268035582791	187115680039194	3.98477e-64	2.46845e-61	0.794886437342711
EXOSC4	188545882374498	106910224604808	0.171731096676676	622544353781725	48019.6	260319	0.862329573726731
EXTL1	126637136592259	259538519370024	0.321855227219103	806382800156741	0.0739418	0.712841	0.926079317758803
EYA1	634502259562327	303810365393516	0.481547381967181	630904406856938	28076.4	145968	0.926079317758803
EZH2	513631436074508	241125723078503	0.139928105578001	172321151696069	1.52472e-52	4.12896e-50	0.945542994669583
EZHIP	540480504307528	424739314720715	0.768856909014975	552429600021247	3.30809e+06	1.3321e+07	0.92693109113931
F13A1	471830872109592	17917716898375	0.259047903097953	69167581300976	462.096	2893.09	0.945542994669583
F2RL3	183011121142234	232329528046876	0.242428891808245	958340923451662	9.38933e-08	1.83232e-06	0.794886437342711
FAAP24	109475333964194	146602030029899	0.118636270070105	123572689821813	4.4502e-21	2.62871e-19	0.794886437342711
FABP4	449551504223957	238167316265956	0.288646270853379	825118285996966	0.0156834	0.15857	0.946377764541293
FABP5	285765046140729	170315425783438	0.186298126405115	91420901041741	6.12568e-06	9.40858e-05	0.864675952044456
FABP6	915954607638291	354058141759646	0.529698501418489	66841446749709	232.277	13656.7	0.928448540372894
FABP7	167472453014923	131415817873858	0.4811040042278	273154695697841	0.00630377572521251	0.00525315820479616	229346620018431
FAIM2	143648952483945	109967394832848	0.315625463646609	348411036176643	0.000493775836995477	0.00113913710685173	0.922866740464942
FAM111B	314809041366888	260253023077102	0.196753160026945	132273872013777	6.09702e-27	4.06894e-24	0.972157883339661
FAM131C	239451617233606	149885302976565	0.403491830184484	371470477873208	0.000203441065601009	0.000612986981410785	0.740277061123834
FAM133A	148899655702968	539973275439769	0.495810859683488	108907109413552	1.2764e-14	3.86742e-12	0.864675952044456
FAM135B	340457805647533	148911255647003	0.308813207215721	482204945149841	1.42091e+08	5.71203e+08	0.745029512844227
FAM153B	270432534233722	108316693422032	0.396967961024701	272860039239519	0.00636037267369113	0.0126061087905339	0.896246230775245
FAM155B	726073352762212	270014341913544	0.32105274648127	841027977093777	0.00409034	0.0462259	0.896246230775245
FAM162B	347857168813734	146360139784495	0.188235882272199	777535813139231	0.752343	6.60128	0.916910653286286
FAM166A	135540238416707	177170373703002	0.274834577717993	644643680478937	11451	62333.3	0.92693109113931
FAM171A2	597925664502677	212334965366867	0.225081988332993	943367201167302	3.95978e-07	6.51665e-07	0.896246230775245
FAM171B	756546249105614	12008698917537	0.190349469159294	630876406988429	28127.2	147608	0.916910653286286
FAM178B	481486854308574	461570254846978	0.520183568973787	887321865543656	7.10616e-06	0.00113277	0.745029512844227
FAM180B	18017333015814	15942466328536	0.401866941032329	396710072432992	7.27523e+09	0.000101014116230937	181201088751161
FAM183A	124667834061177	215711071726369	0.453120331478002	476056925150006	1.93048e+08	6.20371e+08	0.92693109113931
FAM186A	167422778581907	143223136507643	0.208737950666928	686138462364117	68.1963	4295.8	0.926079317758803
FAM189B	128864550547323	167596008724793	0.0997280566763049	16805301768666	2.23174e-49	4.13758e-47	111379738450843
FAM205C	160558996109496	132474743786473	0.508774209583506	260380226220428	0.00921959316144204	0.00745666953198751	229346620018431
FAM222A	637406368859357	174198566936826	0.155382907130327	112109221119616	3.60419e-15	1.15277e-13	0.945542994669583
FAM227A	177497242746698	168533508062052	0.272262285660114	6190115816204	60120	300351	0.92693109113931
FAM229A	973974674952159	105936424936951	0.137661576446912	769542436395131	1.41025	9.18532	121585773816799
FAM240C	102629765301091	148072085476223	0.428269877524203	345744805430204	0.000545317361863667	0.00124945474352705	0.922866740464942
FAM241B	187962897219075	105781279183655	0.203017442899479	521045274105	1.8838e+07	5.31947e+07	122009024194229
FAM24B	209738068622672	191428268905876	0.220123365733095	869640841027244	0.000342554	0.00415883	0.922866740464942
FAM3B	8901490004255	299423743589829	0.381863342688707	784112299131884	0.446535	0.310972	119634206973591
FAM50A	390046958654265	109296521753625	0.125052128876888	874007685716621	2.32952e-05	0.00267935	0.995031561367341
FAM71F2	342655294188603	13820934238565	0.203982808996619	6775538736107	1239.44	7637.26	0.916910653286286
FAM72A	230928686482546	186163810850937	0.184840146306302	100716113123196	7.37596e-10	1.48728e-08	0.922866740464942
FAM72B	19563077758883	226096500720292	0.22424046022657	100827700983064	6.58432e-10	1.32609e-08	0.928448540372894
FAM72C	117628265967475	322640395011888	0.297397001506336	108488112986242	2.02036e-13	5.71051e-12	0.916910653286286
FAM72D	171394336115595	365713716377965	0.285486545257572	128101909688252	1.4378e-24	8.61721e-22	0.926079317758803
FAM78B	116088005502442	127405150336925	0.168854081640314	754528105564648	4.51313	27.7809	122009024194229
FAM81A	480432028983565	210851898992866	0.234956748347501	897407290813441	2.85748e-05	0.000422799	0.843887822532013
FAM81B	163658097383475	148859876510517	0.50899979110464	292455673090669	0.00344947197418119	0.00310900714683643	22004558832929
FAM83D	518839413669358	240210076805717	0.164764965847511	145789534547064	3.82333e-34	4.21633e-32	0.946412670017622
FAM83H	455634440401109	14816284962698	0.141627187869184	104614694294314	1.29826e-11	2.93959e-10	0.95943424924746
FAM90A1	118524778785256	130544755535841	0.298939061341032	436693535298537	1.26002e+09	3.65995e+09	0.922866740464942
FAM9A	338283638677367	198303110636011	0.684944079374633	289517227183079	0.00378950500898193	0.00406743158779725	181201088751161
FAM9C	0.890574108604386	114327525328613	0.438040896655327	260997377645703	0.00905491635878529	0.00762020312862156	22004558832929
FANCA	367464458490013	10288124824405	0.126101462514299	815860864677792	0.0338906	0.344895	0.90593063721884
FANCB	192482324376047	226921499782647	0.207464582679114	109378428285096	7.59864e-14	2.20121e-12	0.916910653286286
FANCD2	321598700977903	221667703181478	0.159776177920493	138736391160754	9.15135e-30	8.27373e-28	0.896246230775245
FANCE	164451192419551	167061166127361	0.142689798205248	117079965231331	1.15988e-17	5.44117e-16	0.794886437342711
FANCG	440487867014289	147060037560591	0.114498077082543	128438871034117	9.30809e-24	4.55979e-22	115299650756476
FANCI	538760100974529	227274865879677	0.15091588854932	150597043203574	2.98117e-37	3.80803e-35	0.945542994669583
FAP	108056895407931	239143879613671	0.271867720224326	879633225365433	0.000141361	0.000136502	122009024194229
FATE1	194062780262646	456431227922837	0.340845650142727	133911413489275	6.81257e-28	5.15105e-25	0.916910653286286
FAXC	146911850695429	198272244006147	0.403590141209583	491271276874887	8.98248e+06	3.01747e+08	0.926079317758803
FBF1	129400284749585	144305210857507	0.131367758632255	109848270504081	4.52104e-14	1.53839e-12	0.794886437342711
FBLIM1	111734866550781	135350912031409	0.171772962223918	787964009463666	0.328325	3.81476	0.709370283899155
FBLL1	767116860211287	138922701083973	0.349127825298642	397913574963952	6.91662e+09	0.000182862232491812	0.916910653286286
FBLN1	205687815971699	149637430240623	0.251703491334494	594498826564809	276477	1.11898e+06	105912715634988
FBN3	108579273269563	344361108974826	0.365687958987888	94168019621951	4.65036e-08	5.68064e-06	121585773816799
FBXL16	143493635429582	241584744636012	0.324983353192355	743375752212821	10.5555	62.489	121585773816799
FBXL18	148941104542996	136898284946507	0.112248731924112	121959760791828	3.26567e-20	1.64645e-18	0.896246230775245
FBXL19	374905156564124	10805361923984	0.0978639708486878	11041205287583	2.41768e-15	7.02336e-13	0.972157883339661
FBXL22	260293352820557	115975887686964	0.137303012204519	844671109721999	0.00299624	0.0409065	0.745029512844227
FBXL6	137669066547687	113509514809912	0.134427632970022	844391233424639	0.00306889	0.026139	121940613765583
FBXO32	573253478299649	169412000274393	0.198558444956616	853209745429909	0.00143718	0.0160857	0.946377764541293
FBXO43	588464630271556	404193982507216	0.222496360499487	181663188377478	9.53871e-60	4.16211e-57	0.916910653286286
FBXO47	0.602478479148896	10259355864025	0.478237790897254	214524156377871	0.0319335380031774	0.0216073942798996	250720538287654
FBXW10	605206141703119	421330602381665	0.399403798154844	105489883753764	5.13469e-12	1.55067e-10	0.740277061123834
FCGBP	558400621738302	146685462736662	0.274919972068504	533556953439932	9.52451e+06	3.55346e+07	0.946377764541293
FDCSP	710796604156781	4235688321687	0.567802820810152	745978738824057	8.66622	73.4228	0.843887822532013
FEN1	126559300256846	163021745526297	0.119422161463808	136508788258452	1.99459e-28	1.37562e-26	111379738450843
FER1L5	95100294452329	232807608601826	0.296322744695697	785655548786519	0.394841	3.52921	0.926079317758803
FER1L6	685438241599787	565147165130821	0.545378367555281	103624785791222	3.67318e-11	1.01046e-09	0.745029512844227
FERMT1	217660132112859	220639511195031	0.302477729518112	729440516320126	29.9981	20.9764	0.972157883339661
FEV	0.787900805088712	126502138584608	0.522713902046128	24201028151236	0.015516119350521	0.0120711632804911	229346620018431
FGD1	32592912204912	138266991314177	0.139263613453246	992843628609395	3.13127e-09	6.1547e-08	0.900484214151191
FGF12	19126661130136	200215267507848	0.275875669893526	725744563067561	39.4468	303.883	0.864675952044456
FGF13	27776759465537	192504395556623	0.244762829716345	786493585564916	0.369287	3.15796	0.972157883339661
FGF17	113427146055965	228019487838558	0.321850072129016	708464926946341	139.397	942.404	0.922866740464942
FGF19	202234685480633	265514274123711	0.480089813860844	553051255115092	3.19296e+06	1.33002e+07	0.896246230775245
FGF22	563393351870528	160325562788997	0.314349127854927	510023882945168	3.39225e+07	1.20268e+08	0.926079317758803
FGF3	0.794982584245997	185248800232239	0.727774648464854	254541430679122	0.0109148150167723	0.00872076232151947	229346620018431
FGF4	178882656784867	204596274494204	0.941477271519062	217314087852689	0.0297697158526618	0.020236231397311	250720538287654
FHAD1	358322922496679	216843014316451	0.247534902681	876009855450156	0.00019508	0.00297891	0.745029512844227
FHDC1	612197613399807	200880628752104	0.238608948541809	841882209278944	0.00380288	0.0513482	0.745029512844227
FHL5	22703959344642	132467565236008	0.288887410621447	45854391837653	4.53033e+08	1.39783e+09	0.916910653286286
FIBCD1	201481820095405	555350580436838	0.516983507647153	107421333992703	6.45356e-13	1.71573e-12	0.926079317758803
FIGNL1	309347219452975	110150842669927	0.123647396862316	890846434822902	5.17443e-06	0.000701285	0.896246230775245
FIGNL2	288988376174115	157700227790839	0.232643479506717	677862229903098	1213.27	9176.17	0.740277061123834
FKBP10	136318662692466	130717745949101	0.243501709201905	53682475731911	7.95054e+06	2.57916e+07	111379738450843
FKBP6	200252643204023	133672073298751	0.396545245727381	33709160490263	0.000749186845487041	0.000662405019316291	250720538287654
FLAD1	241093730963374	103049013838702	0.0908190156029829	113466340891849	7.70728e-16	2.21842e-14	111383846496267
FLNC	969548606058406	328303273892722	0.353831875021691	927851041889869	1.71864e-07	2.01373e-05	119634206973591
FLRT1	167537114061114	139286994416264	0.220377118294478	632039276555665	26089.9	135759	0.928448540372894
FLVCR1	641297597866852	221205216601435	0.135253660291302	16354841423516	4.01753e-46	7.69067e-44	0.946412670017622
FMN2	65724359566649	21960425043886	0.533802548142335	411396032490095	3.88928e+09	0.000105330069190028	0.92693109113931
FMO1	21798149422124	221594116131505	0.343540393378585	645030745736226	1116.23	650.17	0.864675952044456
FNDC10	128373670502821	162138420451173	0.254826477180353	636269912943227	19823.9	8079.34	122009024194229
FNDC9	0.79967062905648	140569781751901	0.40177984202561	349867681372976	0.000467572956872342	0.000592266786972763	176514789994648
FOLR1	547126616512264	203113310561672	0.381896603687147	531854194566402	1.04602e+07	4.86423e+07	0.745029512844227
FOXC2	229668706464359	141573846758298	0.234800207140234	60295452241123	164422	784618	0.916910653286286
FOXD1	359788576521734	205187903460945	0.477874205388505	429376394765083	1.75669e+08	2.71323e+08	176514789994648
FOXD2	110001798904996	210927637748652	0.189308089144333	111420298362335	7.83138e-15	1.92071e-13	121585773816799
FOXD4	877258235284785	167873660437809	0.258021835090764	650618039278559	770.857	42816.3	0.92693109113931
FOXD4L1	268775681788179	115604262673158	0.306788269126364	376821001019244	0.000164422349079538	0.00022297019458003	176514789994648
FOXE1	514118458603455	134316211435825	0.627941675180384	21389918322787	0.0324363298673681	0.0545589991503962	0.928448540372894
FOXE3	170506070262308	204075832281327	0.405964130010546	502694246105008	4.98362e+07	9.41637e+07	176514789994648
FOXF2	190430835956298	200302325940431	0.282879351745416	708083940042038	143.284	972.447	0.916910653286286
FOXH1	475965690346727	240011710902702	0.331145112715696	724793154681897	42.3184	304.004	0.92693109113931
FOXI2	250469545239378	196116769993589	0.377051273174297	5201328942415	1.97869e+07	3.07331e+07	229346620018431
FOXJ1	100268048324358	28932000798471	0.408399227088953	708424474862419	139.805	731.252	121585773816799
FOXK1	893184726398578	123055272621904	0.104242028217921	118047657672827	3.68817e-18	1.26119e-16	114845450627745
FOXL1	313360419587531	154099212499296	0.249702804624367	61713048330038	67728.7	346936	0.896246230775245
FOXL2	242422260692645	15425633261707	0.599965635069735	257108613561076	0.0101380108263172	0.0101324373256427	181201088751161
FOXL2NB	0.883031278280951	132680407854802	0.615194216455744	215672391426565	0.0310271825205803	0.0290225709594615	176514789994648
FOXM1	710682872919052	360842180552449	0.196644916178734	183499369098601	3.30496e-61	1.21242e-58	111379738450843
FOXN1	189292481607592	115898153492756	0.542782268606888	213526049386657	0.0327397379996176	0.0304855649947448	176514789994648
FOXN4	149715502148246	239831639343027	0.376135098234336	637621004976274	18152.4	74508.8	121585773816799
FOXO6	488552158758184	157012391139254	0.333227800562321	471186350221368	2.45462e+08	8.02861e+08	0.896246230775245
FOXQ1	292737545647596	153557605292066	0.345650973159319	444256250426604	8.88938e+08	2.50465e+09	0.972157883339661
FOXS1	105093280035094	285935517992466	0.223607083871101	12787408745838	1.92796e-23	8.74515e-22	122009024194229
FRAS1	423005113456171	173595480848972	0.360426005225987	481639721695798	1.46173e+08	4.68054e+07	0.946412670017622
FRMD3	239292877484065	18651392494641	0.255770130482709	72922481055316	30.4825	229.062	0.900484214151191
FRMPD1	137805348100434	129853572401776	0.296068442480154	438593087848194	1.15491e+09	3.46442e+09	0.896246230775245
FRMPD2	294141741357377	213592030818433	0.504503945617075	423370387236876	2.29874e+09	3.41401e+08	181201088751161
FRRS1L	36274472245582	422366749039239	0.482135429370387	876033419885365	1.94672e-05	0.00299001	0.740277061123834
FRZB	376281490341586	111384791276553	0.201818772344835	551905008550133	3.40837e+06	1.41671e+07	0.896246230775245
FSCN2	630933416633373	131283791004681	0.287593427753403	456490928983435	4.9971e+08	1.51576e+09	0.928448540372894
FSD1L	914904329513821	117020524740988	0.140566764179369	832490705922955	0.00843949	0.103868	0.794886437342711
FSIP2	261690655429996	162646056776101	0.299739968752167	542623853112433	5.7554e+06	2.77294e+07	0.745029512844227
FSTL4	951703320241905	437016964405754	0.323943429029576	134905333846378	1.7781e-27	1.0682e-25	122009024194229
FSTL5	675769923432071	36124727282432	0.5712531732119	632376833538078	25526	137528	0.896246230775245
FTHL17	183703918084387	31020752431405	120878166122314	25662825162334	0.0102795065359839	0.010264175714257	181201088751161
FUT1	148716367260187	101379278198509	0.182189408210036	556449901201911	2.62907e+06	1.2394e+06	0.794886437342711
FUT2	11556481123606	301492086651855	0.287823837171511	104748824702868	1.12677e-11	2.04094e-10	121585773816799
FXYD2	971664252413361	201986916164429	0.427438868225097	472551588495362	2.29532e+08	5.96912e+08	114845450627745
FZD10	127099373909019	259301916119348	0.359236236502826	721814476856952	52.7016	374.212	0.928448540372894
FZD2	536175994055616	124254528340531	0.236516793661993	52535182139372	1.49221e+07	6.04012e+06	0.843887822532013
FZD9	331502958223679	211086432095479	0.3774896961467	559184619474878	2.24668e+06	1.1419e+06	0.740277061123834
G6PD	187157497640478	262217198534064	0.213883248258125	122598286995159	1.48814e-20	5.73753e-19	118876714947973
GABBR2	125619110172867	441237064686577	0.445686655023714	990016325849154	4.15596e-09	6.06111e-08	121585773816799
GABRA2	425163113271882	525408921742741	0.756400008362742	694617815882907	375.315	249.13	0.896246230775245
GABRA3	384112753344868	606856705952214	0.692382368922992	876476255304112	0.000187171	0.00235162	0.916910653286286
GABRB1	216706898623293	173957961855276	0.578748731754982	300575970728732	0.00264918258266186	0.00233721826093811	229346620018431
GABRD	166615607057257	452934518600639	0.194372875181971	233023521505561	4.19639e-106	1.01382e-101	0.794886437342711
GABRE	824657945549771	286104267700758	0.235846770782934	121309385221169	7.24147e-20	2.72315e-18	116063127897958
GABRG3	119032752306792	166652727454244	0.436712687913126	381607249037371	0.000135592684337404	0.00033987306371115	0.926079317758803
GABRQ	16136657109949	463188936650537	0.389946970518141	118782545235593	1.5354e-18	6.68561e-17	0.916910653286286
GABRR1	177004069049895	257356352510135	0.529640045935277	485908032229089	1.17932e+08	1.52225e+08	250720538287654
GABRR3	320468468416501	401782379058152	0.459222552326367	874918657680834	0.000214896	0.00329283	0.740277061123834
GAD1	394471037274568	479566490580935	0.421110016293647	11388152074885	4.79041e-17	1.7427e-14	0.896246230775245
GADL1	272136260090772	201871978779288	0.55024331691144	366877656801743	0.000243713953236321	0.000322057098467492	176514789994648
GAGE1	546711572216721	443697674605353	0.963400456234987	460553731040718	4.11402e+08	1.26519e+09	0.926079317758803
GAGE2A	469996771560535	43952641913463	0.994454866454766	441977241965281	9.88049e+08	2.88982e+09	0.928448540372894
GAL	127352023343827	306458569216007	0.546849484215192	560407530887259	2.0937e+06	8.67713e+06	0.922866740464942
GAL3ST1	73902920423251	250287107550093	0.312698230479161	800411013412414	0.120334	0.893318	118485111424296
GAL3ST2	109514337300883	143512597942302	0.367223286912903	390804731227026	9.30451e+09	0.000241511833931879	0.916910653286286
GAL3ST4	112932472467842	122144006591547	0.210148870660869	581226090853749	616347	2.0976e+06	121585773816799
GALNT10	876546030812128	104015275781158	0.108793267726336	956081915314861	1.16828e-07	1.52841e-06	119634206973591
GALNT13	135712934990037	199614236636973	0.354569513191779	562976311302336	1.80457e+06	7.59402e+06	0.916910653286286
GALNT5	116360566475554	127772129631006	0.387889117245307	329403749551965	0.000987593234764059	0.00216493365027998	0.92693109113931
GALNT9	850078492154172	102226833742694	0.393999005737086	259459623639023	0.00947020972411324	0.0176104932050625	0.928448540372894
GALR2	654702517733459	123682082854552	0.249928790523968	494869288949289	7.47135e+07	2.56024e+08	0.916910653286286
GALR3	15632658343313	133062764732068	0.32094710718154	414594061621507	3.38422e+09	9.24978e+08	0.926079317758803
GAP43	976190287349205	278793597598436	0.384896399251676	724334127678183	43.7763	313.607	0.92693109113931
GAREM2	110426134015443	219017854056212	0.226909165109122	965222598879536	4.81001e-08	6.44926e-07	121585773816799
GAS2L2	0.792130852402659	118436422254255	0.575703940995963	205724529259537	0.0396626367945973	0.0296994451992454	22004558832929
GAS2L3	24538127647285	117060515664129	0.159022622808199	736124921076911	18.2197	130.167	0.972157883339661
GAST	810111712818923	50049373632205	0.841382311551226	59484699101804	270661	1.25861e+06	0.916910653286286
GBA	350989882234644	137223752031409	0.107385381748633	127786249670948	2.15852e-23	1.18687e-21	0.995031561367341
GBP2	398136409144624	139484081426581	0.157975892539432	882945360740813	0.000105188	0.00127022	0.978648097738888
GBX2	20057011706775	29280187256402	0.453923937894069	645046114823647	1115.1	26662.5	22004558832929
GCG	253252758988134	247365160538412	0.701046295363756	352851391091169	0.000417899981989849	0.000416936278181338	229346620018431
GCM1	523559021232858	344224642800103	0.460419847116999	747632068764035	7.64323	59.8377	0.922866740464942
GCNT3	322799681357749	255385636960807	0.333940403490828	764764114468173	2.047	17.4816	0.896246230775245
GCSAML	742376347012804	144565589628986	0.427379057698462	338260817943457	0.000718009928165276	0.00161612979370217	0.922866740464942
GDAP1	229326744516552	102920988161822	0.169885840563183	605824404321347	137616	674364	0.900484214151191
GDAP1L1	369693740914373	217337543246872	0.409782511566837	530372910292984	1.13461e+07	1.81862e+07	229346620018431
GDF10	357483308156716	281607388088254	0.469104923543083	600307892659308	193610	989825	0.843887822532013
GDF3	119364244543704	124992951541929	0.412762673144108	302820384871115	0.00246012075945531	0.00217845360640145	229346620018431
GDF5	149648372229186	203870762240057	0.448136165207126	454930394081961	5.38237e+08	6.38179e+08	250720538287654
GDPD1	109823627288356	116095901898505	0.146617273856869	791829631287787	0.240787	2.54697	0.794886437342711
GDPD2	215947288615625	142879143255344	0.308655913033962	462907520063037	3.67302e+08	4.44941e+08	250720538287654
GDPD3	703111042268547	155666278630833	0.201222388539655	773603174878106	1.02568	9.07031	0.896246230775245
GFY	182688888346253	292122717265028	0.574837169812113	508183417158826	3.73808e+07	5.60013e+07	229346620018431
GGN	879885867631357	159144078337923	0.237832464687141	669143628256429	2209.91	13194.1	0.916910653286286
GHRHR	753507152815264	37275893436965	0.427060902926443	872847249222094	0.000258135	0.00392921	0.740277061123834
GINS1	371769008832322	274404178722859	0.182371307998599	150464555929471	3.64233e-37	4.82565e-35	0.90593063721884
GINS2	369938234779749	178894171442854	0.165392038067476	108163714247157	2.87953e-13	8.12791e-13	0.90593063721884
GINS3	15756087940391	142588739799709	0.132916282855045	107277104608178	7.54422e-14	2.06188e-11	0.896246230775245
GINS4	124704554692794	175020740245365	0.186679599477475	937546152526879	6.88738e-07	1.14153e-05	0.864675952044456
GIP	228827682715293	322509502680284	0.714342432735879	451477453810347	6.33842e+08	1.0091e+09	181201088751161
GIPR	457342023844099	164283707334831	0.286406468556485	573603341303135	969195	4.56354e+06	0.843887822532013
GJA10	129530403671056	574095265722667	0.789402702160754	727252724308205	35.2823	255.854	0.92693109113931
GJA3	717858058379016	1793320512769	0.377481563688818	475074993131941	2.02664e+08	6.55948e+08	0.916910653286286
GJA5	340051792041442	152576052568648	0.184089931189486	828812589492466	0.0115047	0.129308	0.864675952044456
GJB6	316264444960511	312080878905805	0.567171287169335	550240969466831	3.74635e+06	1.8464e+07	0.745029512844227
GJB7	242110440696488	142332907556125	0.532767474550586	267157651987275	0.00754958574095743	0.00789997423284798	176514789994648
GJC1	197512429625787	235968193229205	0.169543871461125	139178249968954	4.937e-30	3.40823e-28	122009024194229
GJD4	0.798671390576572	118128487184956	0.396074661925481	298248028820338	0.00285923059846836	0.00260772421429446	22004558832929
GLA	101144169984189	118684855374616	0.125924252302935	942509907377465	4.297e-07	5.28274e-06	121940613765583
GLB1L3	176193690402025	337954823937249	0.474129921811733	712789487417002	101.916	702.347	0.92693109113931
GLDN	210795312527752	386253804292903	0.348244123707565	110914665316006	1.38006e-14	3.30768e-13	121585773816799
GLI1	521839493955713	138201597937443	0.213476648290106	647385084244122	9553.62	57393.8	0.843887822532013
GLI4	665569587154507	158145554676913	0.129700495083863	12193134233964	3.38161e-20	1.33678e-18	114845450627745
GLIS2	511203721377322	103172216349327	0.203621932272117	506685184636444	4.04449e+07	1.38683e+07	0.947962011920702
GLP1R	191771051887543	596053280965654	0.636065065092286	93709482516411	7.18838e-07	1.11964e-05	0.922866740464942
GLS	161345890209006	108387596901545	0.162898757838802	665367853871547	285.857	13998.1	111379738450843
GLUL	143388224848519	20382508980708	0.285573273291813	713740076084787	95.1122	550.842	111383846496267
GLYATL1B	301040062107717	216637815141191	0.572763896221386	378232316265715	0.000155371467442276	0.000206244147566991	181201088751161
GMCL2	446438006936202	264851614496162	0.582501565899004	454679660967783	5.44686e+08	1.65369e+09	0.922866740464942
GMNN	168984844189286	220587005399364	0.14486662448304	152269031039091	2.34436e-38	5.30898e-36	0.572985601436948
GNAL	257689467063901	204362073265875	0.209007536859482	977773702980245	1.40313e-09	2.44853e-07	0.972157883339661
GNAT1	303787612996097	138743865349928	0.225868157942823	614269256072163	81134.2	402295	0.916910653286286
GNAZ	512089029746239	365829928353617	0.246620401244896	148337252922699	8.86723e-36	1.03835e-33	0.947962011920702
GNB1L	251480222910586	103508787621909	0.121396165796024	852652857223101	0.00150805	0.0164042	0.972157883339661
GNG4	487339073884138	546704767963801	0.438782747189522	124595775806031	1.24026e-21	6.537e-20	0.946377764541293
GNGT1	105372605900101	485618534320078	0.68527012317528	708652716493618	137.519	93.6053	0.916910653286286
GNRH1	218441612151356	103913371724059	0.153808641897258	675601646580243	1418.37	8688.73	0.916910653286286
GOLGA6D	0.736000548938986	119482635732974	0.588334992799028	203086060144971	0.0422691374182034	0.0386541849840278	176514789994648
GOLGA6L10	106235213974414	11415990025883	0.18964824551512	601956005175529	174892	822710	0.928448540372894
GOLGA6L7	0.690326378093649	155167301896307	0.663055985699759	23401840152691	0.0192742406479185	0.0183022744462933	181201088751161
GOLGA6L9	588881442907396	118322288181717	0.136960261579832	86391692609866	0.000566232	0.00678838	0.916910653286286
GOLGA7B	180921420539365	179369547157897	0.329222540650354	544827662175156	5.08602e+06	1.54394e+07	122009024194229
GOLGA8A	29006722727135	175300879650371	0.217740815201004	805089663545829	0.0821897	0.802887	0.90593063721884
GOLGA8B	839077531860052	163731212112457	0.151365479206772	108169453808416	2.86156e-13	6.43144e-12	114845450627745
GOLM1	402370929712779	127781050067697	0.198192127069173	644733229100966	11383.6	58908.3	0.978648097738888
GP2	168686287693123	424553180185928	0.614471977500773	690923582736358	487.271	2381.85	122009024194229
GPAA1	104103490136054	143290633085494	0.130478580378285	10981927659702	4.66854e-14	1.15152e-12	111383846496267
GPAT2	955785449007135	153454878574433	0.239982209480077	639442727470897	16115	91747.3	0.864675952044456
GPC2	160227818577204	211905450607053	0.238455693640324	88865754208697	6.30213e-05	0.000827544	0.916910653286286
GPC3	292715926123182	59498034318795	0.305818608434468	194553348546625	2.62632e-70	2.92046e-67	0.95943424924746
GPC5	92498842001165	148894514044983	0.357460997830172	416533593731314	3.10894e+09	8.81161e+09	0.896246230775245
GPHA2	274226464176171	102293893960083	0.484876972613973	210968760608729	0.0348852727434138	0.0234164040456385	250720538287654
GPR1	66804505495428	23753829736633	0.395221266387066	601026102511632	185225	878287	0.916910653286286
GPR119	199028864544307	278365929810541	0.772582252061459	360305882082827	0.000314494324605502	0.000332527356191153	22004558832929
GPR137C	80326511386716	122932758523981	0.166888394658772	736616580052404	17.5605	163.046	0.740277061123834
GPR150	165871798545953	169453038410245	0.291702262311267	580910950321757	628060	2.76812e+06	0.926079317758803
GPR158	139428850091366	341180106743003	0.302856437246895	112654071296779	1.94451e-15	7.52857e-14	0.794886437342711
GPR161	116648706240902	100896683798367	0.178971770255818	56375753368337	1.72461e+06	5.5591e+06	121585773816799
GPR19	213574739977947	253603668357776	0.228666198622862	110905621331486	1.39409e-14	4.36292e-13	0.92693109113931
GPR27	312397985931557	157721544689013	0.403450712257273	390931382439689	9.25587e+09	0.000240398196798824	0.916910653286286
GPR35	234731016496967	303171278355388	0.302261638981767	100300944366174	1.12409e-09	2.12898e-08	0.972157883339661
GPR37L1	279136744600129	141098269021233	0.225568375543248	625523275066455	39692.3	251020	0.740277061123834
GPR50	135308638663954	169194157825129	0.859200460449859	196920469219188	0.0489295902932463	0.0347148523242473	229346620018431
GPR61	635595706235699	120317542605325	0.240916304409835	499416354987111	5.90913e+07	2.02992e+08	0.92693109113931
GPR63	699287016684086	142500342749418	0.292910839193426	48649733530454	1.14472e+08	3.78596e+08	0.926079317758803
GPR88	17788460715917	156778607810084	0.401849916166375	390142193647178	9.56293e+09	0.000206465350872117	111379738450843
GPRC6A	0.86416996040371	201888095271779	0.773414544063179	261034779888089	0.00904502110956758	0.00674591596686261	250720538287654
GPRIN1	172040321556743	261493689191149	0.19559503403329	133691374366203	9.15969e-28	5.20409e-25	121585773816799
GPSM1	589248797533373	203463429102351	0.204887601765832	993049005155965	3.06744e-09	4.76146e-08	115299650756476
GPSM2	219219198535823	159729468934589	0.139933249974878	114146901442841	3.5316e-16	1.30424e-14	0.90593063721884
GPX8	199944608498725	10280463084451	0.189496591006333	542514407771456	5.79078e+06	1.75452e+07	121585773816799
GRAMD1A	199999301993427	145211695307924	0.147881173462445	981948492211554	9.28166e-09	1.43143e-07	111379738450843
GRAMD1B	404390528378752	101571650028153	0.273467127768253	371421789730532	0.000203833109238398	0.000476510983239024	0.972157883339661
GREB1	685440899156648	146745367188615	0.253780881458752	578236494195748	736577	2.52698e+06	119634206973591
GRID1	195289717659292	100737037492693	0.330347715186879	30494243750318	0.00229280350257407	0.00368127642783287	122009024194229
GRID2	1240363252945	224139685174524	0.721777405974686	31053851688783	0.0019003139097557	0.00157697726420016	250720538287654
GRIK4	351528643071586	261533356405445	0.336990535298634	776085168604749	0.843609	8.97812	0.745029512844227
GRIN1	580838003447796	265870074761318	0.410617860132833	647487848373938	9488.83	52234.9	0.926079317758803
GRIN2A	48239831671498	32141272400544	0.415642699927408	77329091563878	0.105116	9.82377	0.843887822532013
GRIN2C	257927293471711	119806716872845	0.159161561558212	752736500571635	5.17745	44.7308	0.843887822532013
GRIN2D	574780289653007	10593180128299	0.224664076129177	47151197070813	2.41569e+08	9.40149e+07	0.745029512844227
GRIN3B	671338345944379	12925053012327	0.280688452660375	460476834362897	4.12925e+07	1.2695e+09	0.926079317758803
GRM1	257272119266085	108734731557069	0.356302929945431	305174957651127	0.00227511823341395	0.00202685030472405	229346620018431
GRM2	194331395297627	166506568343321	0.257783450425797	645916439043281	10528.3	57567.4	0.92693109113931
GRM4	465050908404433	294122122808895	0.467097383847323	629680518409911	30384.3	158028	0.922866740464942
GRM5	16035859394023	219353203292595	0.655101724575485	334838384732904	0.000812843452045087	0.000714809872907787	250720538287654
GRM7	825639654066938	113230447094417	0.403703628422635	2804791414356	0.00503491508017683	0.00983920703283862	0.928448540372894
GRP	276289865377904	321016707005273	0.632822419908703	507277708415555	3.92052e+07	6.08383e+07	22004558832929
GRPR	4182458033647	393266367641819	0.418317704542918	940114088815648	5.39746e-07	8.55111e-06	0.916910653286286
GSC	342189798280253	280397018589701	0.477561817341819	587142875346343	432055	1.02645e+06	181201088751161
GSDMC	209042787522673	368186005085179	0.346129292519711	106372391196625	1.99967e-12	5.05019e-11	0.928448540372894
GSTA4	120971451701255	107556629063937	0.155344527489131	692374754375963	439.849	2160.65	121940613765583
GTF2IRD1	592732475261477	111002817264226	0.117369274621546	94575703583541	3.15181e-07	5.00837e-07	0.946377764541293
GTSE1	21778208317223	354716984004028	0.204670457868638	17331127691701	2.73905e-53	8.22729e-51	0.900484214151191
GTSF1	251466487748208	426755157398179	0.452060668148732	944021870218915	3.72002e-07	6.08467e-06	0.90593063721884
GTSF1L	0.932244945047916	17328860483869	0.523051403701604	331303201965116	0.000922904133754812	0.000908054683698785	22004558832929
GUCA1A	0.605496759624846	105858785264069	0.487693909653293	21705988770564	0.0299615070555487	0.0221135520241989	229346620018431
GUCA2A	245766520762206	270058548997794	0.471956129848414	572211127090422	1.05208e+06	465383	0.896246230775245
GUCY2D	382127096072342	216439425924743	0.30914112859008	700131447769089	25.3572	2057.58	0.740277061123834
GUCY2F	0.824181567260723	149571254270184	0.5454967627001	274192744114258	0.00610798324270589	0.00468920965408981	250720538287654
GULP1	156295974799297	18205535867788	0.348720254703618	522067061555145	1.78276e+07	7.55491e+07	0.794886437342711
GXYLT2	590139438622996	249686539181819	0.319557143057208	781351769492817	0.556136	5.36261	0.843887822532013
H1.1	165057059172985	159484781799205	0.425462051352107	374850779975245	0.000177889806404998	0.000240059482539214	176514789994648
H1.2	679629455395708	145991729558028	0.214166252158485	681674764752349	931.246	4853.71	111281493908931
H1.4	119398615550733	138486222947842	0.236976770317601	584387333670893	510008	2.28036e+06	0.922866740464942
H1.5	344911662431081	309731648631076	0.392825363663535	788471614313504	0.315251	0.149825	181201088751161
H1.6	0.915290763777648	109979495970851	0.449632128906684	244598837361278	0.0144455658692535	0.0104098372004659	250720538287654
H1.7	283112232953308	311393482202666	0.573289480347537	54316971247038	5.58206e+06	9.63914e+06	22004558832929
H2AC1	0.872135267856265	155125303888607	0.434700498705736	35685559218467	0.000358954244185641	0.000451544001836459	181201088751161
H2AC11	169539116764484	210663429400118	0.291071974121073	723750302777318	45.7021	252.135	122009024194229
H2AC12	112950836798751	200584848856098	0.39497965027504	507835906777534	3.80709e+07	5.92044e+07	22004558832929
H2AC13	10022394308322	367659213887419	0.382669047440798	960775940322946	7.41448e-08	1.26745e-06	0.928448540372894
H2AC14	125422450179952	20885816781143	0.417254514911356	500553404091509	5.57074e+07	7.48845e+07	250720538287654
H2AC16	236189423370465	290058393693531	0.384251472775397	754866055810997	4.39757	15.4008	22004558832929
H2AC17	952968363899209	251655480903264	0.270435945889483	930554849413793	1.33303e-06	2.01625e-05	0.926079317758803
H2AC20	438572038989246	108724299506222	0.181622645251245	5986274418359	214702	1.23744e+06	0.740277061123834
H2AC4	141031491182693	159512295526171	0.376978373804022	423133809816623	2.32305e+09	3.5338e+09	176514789994648
H2AC7	160189193415521	204050224009986	0.264325723013116	771965065238317	1.16649	9.91269	0.92693109113931
H2AC8	108233637940809	158156454861036	0.237724463474018	665293140427348	2873.12	19351.3	0.794886437342711
H2AW	104654685007157	27472092281206	0.339873694517849	808302987972589	0.00631771	0.655362	0.864675952044456
H2AX	120642805858864	145096594474527	0.141080150677667	102846923381899	8.26055e-11	1.41063e-09	118876714947973
H2AZ1	430139123876727	117461371983847	0.109061326240641	107702130565213	4.75899e-13	1.07401e-11	111379738450843
H2BC1	0.647917300387323	119095628643003	0.451739008915554	263638132400619	0.00837955058649334	0.00709043094102172	22004558832929
H2BC11	701594186615923	184186227686223	0.234631695746049	785001476891575	0.415988	3.74251	0.916910653286286
H2BC13	326300597268729	25039617692084	0.373779736164896	669903027622598	2098.07	5483.82	22004558832929
H2BC14	0.639255605041666	132299131752961	0.373244639573022	354456883571875	0.000393255803399835	0.000409601917792186	22004558832929
H2BC15	981055040951584	153474699839105	0.180096022339639	852182618168381	0.00157057	0.00137967	121585773816799
H2BC17	885955673018597	195254225993356	0.269516506268998	724461105170596	43.3682	313.787	0.916910653286286
H2BC18	256858051405346	204027331661226	0.235675782317881	865711910042726	0.000483837	0.00584743	0.916910653286286
H2BC6	539638487905179	172960456497864	0.25806369304826	670223906566815	2052.5	12164.4	0.928448540372894
H2BC7	411936685790836	242763903151637	0.374551672952379	648145291243972	9084.35	19387.5	250720538287654
H2BC8	397549547028873	21965182420943	0.246532326271511	890965608978694	5.11911e-05	7.35903e-05	0.843887822532013
H2BC9	423883599127582	231968489437979	0.407351781956522	569454951992178	1.23698e+06	2.31762e+06	22004558832929
H2BU1	108870616688427	318939550586507	0.453146228459431	703833620486727	194.549	1300.98	0.916910653286286
H3C10	157555073530995	200026023857913	0.229562001909527	871337687396303	0.000294954	0.00415883	0.794886437342711
H3C11	0.964227633893908	141012884912903	0.411613943920967	342585296235684	0.000612872060784947	0.000597136787398243	229346620018431
H3C12	163116090352401	26980304798563	0.376607079668225	716404609874341	7.833	288.85	181201088751161
H3C13	177225507882419	18570291903598	0.367144092594463	505803913999242	4.2359e+07	6.29323e+07	229346620018431
H3C4	303264708598078	226569699315284	0.247124915659882	916822566070641	4.80869e-06	7.01353e-05	0.916910653286286
H3C6	289441793412875	169354697149338	0.20909435510871	809943898587264	0.0552132	0.556211	0.896246230775245
H3C8	97893420651605	300692718777573	0.469841344565176	639987779397861	15550.1	8352.71	0.922866740464942
H4C1	0.80614745920034	115962313581101	0.37993680963486	305214737399483	0.00227210517093958	0.00210457477926498	22004558832929
H4C12	824565024074228	190098425107913	0.265842141527525	71508009985027	86.273	597.989	0.92693109113931
H4C14	167067190875001	204537697693479	0.228458843204782	895293414009538	3.46156e-05	0.000464423	0.922866740464942
H4C2	222966653624718	116396481679563	0.362144098066635	321409301714329	0.00130857274704999	0.00150695173790061	181201088751161
H4C4	328955707888213	180911980822217	0.315902292020114	572683343527935	1.02323e+06	1.93709e+06	22004558832929
H4C5	861988076895222	252554434815081	0.307822050532973	820455956218214	0.0231438	0.236194	0.922866740464942
H4C8	515438318493656	261368058863702	0.250730256700107	104242727743991	1.92123e-11	5.48898e-10	0.740277061123834
H4C9	64976516593554	104028405758457	0.15252218993607	682054236187278	906.974	5508.66	0.946377764541293
HAGHL	102956271356031	285890363666198	0.253079151680843	11296480242147	1.36583e-15	3.51849e-14	122009024194229
HAPLN1	925002962833516	326420414184311	0.488927821204644	66762495408844	245.134	14375.8	0.928448540372894
HAPLN3	143984247217785	140103805956559	0.214978818893084	651709813450214	716.805	46266.6	0.794886437342711
HASPIN	340787902887672	273557225813867	0.208031480877314	131497994755513	1.70626e-25	1.46083e-23	0.740277061123834
HAUS5	611074681334023	10174381001312	0.0875558456111443	116204474187809	3.24433e-17	1.24796e-15	0.945542994669583
HBE1	69226466974807	228307100716376	0.601374524175213	379642122402009	0.000146799982035947	0.00036742498489341	0.922866740464942
HCAR1	959675921832382	183618371047094	0.323337545215072	567884471705745	135608	5.72608e+06	0.926079317758803
HCN2	790727614629039	331576016759562	0.297566849894026	111429084549454	7.75448e-15	3.06186e-13	0.740277061123834
HCN4	894889425945938	116016643356366	0.455218037017425	254859504505805	0.010815781023351	0.0199453627041365	0.926079317758803
HCRT	0.870077161183212	151094927239891	0.464536109472076	325259811151395	0.00114355109875521	0.00132889795059988	181201088751161
HDAC11	102630409065468	176946263988977	0.130018781495014	136092849013327	3.52678e-28	3.71504e-26	0.709370283899155
HECW1	280199082571713	109896028739335	0.299765902256794	366606168053072	0.000246314539080814	0.000612986981410785	0.896246230775245
HELLS	326915409295732	241239528085772	0.179705547322559	134241558861154	4.3653e-27	3.40206e-25	0.90593063721884
HEPACAM2	230511209088216	135568511340903	0.451284989232596	300405541011757	0.00266406801424475	0.0021595399621112	250720538287654
HES2	323294512881751	29095572570925	0.32857615037083	885504700754691	8.36486e-05	0.00133291	0.740277061123834
HES4	1620721291464	122683252100802	0.191723542711775	639896646836096	1564.32	64591.1	122009024194229
HES5	786801982687499	175645984700576	0.264624385901812	663755851910596	318.921	18502.8	0.92693109113931
HES6	354489023216617	140851655180361	0.150609425632271	935211422452834	8.59129e-07	1.35103e-05	0.90593063721884
HES7	13261759653063	186693464791726	0.466997113961127	399774343803047	6.39492e+09	7.18847e+09	229346620018431
HEY1	262022521100432	133516860613697	0.151258877722667	882704292296156	0.00010748	0.00140106	0.900484214151191
HGH1	223869578347847	107195111107133	0.131803980872882	813291908159565	0.0419074	0.363919	105912715634988
HHIPL2	13307398580044	581797106965211	0.419404213595264	138719900302828	9.36422e-30	6.2938e-28	121585773816799
HIC2	311490407688218	126072966313234	0.163354329268924	771776094808511	1.18391	10.3796	0.896246230775245
HID1	660490235913282	108823206744587	0.206390025416542	527269699807232	1.34433e+07	3.98043e+07	118485111424296
HIGD1B	484608231006444	31289998686829	0.178412822976488	175379763431872	7.34984e-56	2.6134e-52	0.843887822532013
HJURP	336517507353932	39013867385306	0.198535977259925	19650779633874	5.69317e-72	8.04562e-69	0.90593063721884
HK2	476726998901541	155214291997439	0.295171278298333	525844834538956	1.45276e+07	5.28466e+07	0.947962011920702
HKDC1	172405381604924	166011497537651	0.248799541840758	667250013040239	2514.82	1168.75	118876714947973
HLA.DOB	101227631714214	115531149032222	0.25430338899288	454304401879035	5.54477e+08	1.2961e+09	121585773816799
HMCN2	46136947993993	141126249559378	0.310406686691286	454649515007821	5.45466e+07	1.61458e+09	0.947962011920702
HMGA1	361666766885891	17213575160838	0.161060902112024	106876187424217	1.16319e-12	2.8639e-11	0.978648097738888
HMGA2	650092830969845	487928976852946	0.515757671365305	94604308174672	3.06677e-07	5.02591e-06	0.916910653286286
HMGB2	196664792881483	137832531428429	0.130850975866391	105335501333339	6.05085e-12	1.28621e-10	105912715634988
HMHB1	0.777330773124366	158233944226645	0.445084355564972	355514504718526	0.000377770628290616	0.000474032377331863	181201088751161
HMMR	369559662118178	323768305300396	0.18223031613985	177669836808013	1.27357e-56	4.12932e-54	0.972157883339661
HMX1	10402758794185	208171241862104	0.968076241555985	215035999155925	0.0315267504373797	0.0294468228674609	176514789994648
HMX2	126342633754918	250733621032485	0.8736657011735	286990345043536	0.00410597150750225	0.00449362114541388	176514789994648
HMX3	121615216439904	220817843715286	0.891206960309989	247773921826731	0.0132217743319641	0.0108235774328427	22004558832929
HNRNPCL3	136057665711792	253002191284398	0.977211238197321	258902253059549	0.0096248796804778	0.00714291228230951	250720538287654
HOATZ	136548978315031	175379817063172	0.414888075223973	422715974587832	2.3666e+09	2.58153e+09	250720538287654
HOMER3	542273396082822	127278639328667	0.177143948348632	718504021814925	67.1874	462.161	0.946377764541293
HOPX	121910227086719	105180111376445	0.206711476742342	508825697702059	3.61369e+07	1.36031e+08	0.864675952044456
HOXA10	112367234849065	563599033405073	0.397936473362574	141630403627656	1.55134e-31	1.5829e-29	0.896246230775245
HOXA11	118980650980358	527043350209335	0.577243791940962	913034245785771	6.82829e-06	9.84263e-05	0.916910653286286
HOXA13	274502189236597	698011262233379	0.387659387902539	180057876583364	1.75486e-58	7.26149e-56	0.90593063721884
HOXA3	123606679264258	28485423583822	0.280846846550811	101426894884748	3.57129e-10	8.51731e-09	0.794886437342711
HOXA6	304260836351527	342198542691465	0.545823223620834	626940239774736	3624.36	72331.7	250720538287654
HOXA7	275997999304601	216479754648249	0.487903973016925	443693363080565	9.12494e+07	1.42385e+08	181201088751161
HOXA9	714552490999352	266871268954311	0.398275929492004	670066276148554	2074.76	12305.9	0.92693109113931
HOXB13	24026627373832	544082985841077	0.684340346742129	795047359740279	0.1858	1.77493	0.896246230775245
HOXB7	693263721280754	168358744998935	0.251806241022305	668604337666207	2292.85	16750.3	0.740277061123834
HOXB8	3947095102021	326127432407145	0.467579149669373	697480699551618	306.291	1074.24	176514789994648
HOXB9	906552401033685	48800888953213	0.545106590298416	895254062631992	3.47393e-06	0.000465481	0.922866740464942
HOXC10	231477101712354	387338929913393	0.733254151688363	528246487280735	1.27457e+07	4.82033e+07	0.916910653286286
HOXC11	182306809231694	284804123643162	0.753455077786908	37799748391066	0.000156844207703991	0.000153194591365596	250720538287654
HOXC13	359766255302901	371297650524172	0.673943967915952	550932522880711	3.60212e+06	6.37403e+06	22004558832929
HOXC4	166717951424146	190419889128262	0.305297489117864	623719145802563	44549.7	226071	0.928448540372894
HOXC5	0.678015248056426	15573200846944	0.685383389324683	227218825105879	0.0230751425933507	0.015986307010639	250720538287654
HOXC6	22940716216116	481564113122485	0.518505508012999	928754093602438	1.57894e-06	2.3778e-05	0.926079317758803
HOXC8	591793578692417	370730185378643	0.638939458510859	580227407214267	654215	2.87281e+06	0.92693109113931
HOXC9	32892682532703	592246555947604	0.579076144244207	102274383400923	1.49419e-10	3.93006e-10	0.745029512844227
HOXD1	83487216635841	493602707721123	0.501701452955312	983857441140577	7.67912e-09	1.43058e-07	0.922866740464942
HOXD10	179323116492819	446153977675042	0.466241052164445	956916975894438	1.07768e-07	1.80637e-06	0.928448540372894
HOXD11	190069963001429	260172114036548	0.763415400558999	340800190624975	0.000654404375375596	0.000809507631869886	176514789994648
HOXD13	244700975401301	345410625510663	0.806378011190117	428348269319593	1.8399e+09	2.76551e+09	181201088751161
HOXD3	476008885197074	362809523300887	0.379219135418947	956727890063008	1.09756e-07	1.84336e-06	0.922866740464942
HOXD4	698283035836103	46754815749951	0.45111295759203	103643256002933	3.60291e-11	8.06096e-10	0.92693109113931
HOXD8	440559424648033	311613706601881	0.250470194586844	124411492200058	1.5624e-21	9.14005e-23	0.843887822532013
HOXD9	851415438979067	46409893191191	0.322131462731111	144071283188908	4.66716e-34	4.98725e-31	0.916910653286286
HPCA	260795056862157	171226050457572	0.363403048999843	471173951150988	2.45611e+08	3.44174e+08	22004558832929
HPDL	216004205445887	232599124343568	0.294002885071394	791145720515921	0.254393	2.31771	0.92693109113931
HPSE2	31782224452793	21100242637947	0.401870452543807	525050859160811	1.5168e+07	2.49341e+07	22004558832929
HRCT1	404019730019777	286121598952306	0.270628191598641	105724979080022	3.99704e-13	1.01716e-10	0.896246230775245
HRH3	136098540472461	125692172394065	0.452512817725603	277764888574457	0.00547537489856759	0.0046031367318157	229346620018431
[truncated: 1,890 more rows]
